# Supplementary material for: Combined lineage tracing and scRNA-seq reveals unexpected first heart field predominance of human iPSC differentiation
Source: eLife. 2023 Jun 7;12:e80075. doi: 10.7554/eLife.80075 (PMC10348749; doi:10.7554/eLife.80075)
Supplement: Figure 1—source data 2. [file elife-80075-fig1-data2.xlsx]

## Sheet: Sheet1
Target	sgRNA Sequence
TBX5	GAGCGACAATAGCTAAAGTG
MYL2	CGGAGAAGAGAAGGACTAGG
CCR5	GCAGCATAGTGAGCCCAGAA
