# Supplementary material for: Combined lineage tracing and scRNA-seq reveals unexpected first heart field predominance of human iPSC differentiation
Source: eLife. 2023 Jun 7;12:e80075. doi: 10.7554/eLife.80075 (PMC10348749; doi:10.7554/eLife.80075)
Supplement: Figure 1—source data 3. [file elife-80075-fig1-data3.xlsx]

## Sheet: Sheet1
Construct	PCR Method	Forward Primer (5' -> 3')	Reverse Primer (5' - 3')
TBX5-Cre	5' inside/outside	CGGTTAGGGCTAACAGTCTCTC	GGTGTACGGTCAGTAAATTGGC
	3' inside/outside	CACTGCATTCTAGTTGTGGTTTGT	GGTTTCAGGGATGGTTTACTTGA
	Outside/Outside	CGGTTAGGGCTAACAGTCTCTC	GGTTTCAGGGATGGTTTACTTGA
CCR5 LSL TurboGFP	5' inside/outside	GACAGGGAAGCTAGCAGCAA	ACCGTAAGTTATGTAACGCGGA
	3' inside/outside	TGATCGGCGACTTCAAGGTG	TCTCATTTCGACACCGAAGC
	Outside/Outside	GACAGGGAAGCTAGCAGCAA	TCTCATTTCGACACCGAAGC
MYL2-tdTomato	5' inside/outside	ACATCTCTGCATGATGTTTACTTGG	TTCGACATCCCCTGCTTGTTTC
	3' inside/outside	TCGAGATCCGGAACCCTTAAT	CTACCATGTGTCAGTCCGCTT
	Outside/Outside	ACATCTCTGCATGATGTTTACTTGG	CTACCATGTGTCAGTCCGCTT
