# Supplementary material for: Combined lineage tracing and scRNA-seq reveals unexpected first heart field predominance of human iPSC differentiation
Source: eLife. 2023 Jun 7;12:e80075. doi: 10.7554/eLife.80075 (PMC10348749; doi:10.7554/eLife.80075)
Supplement: Figure 4—source data 1. [file elife-80075-fig4-data1.xlsx]

## Sheet: Sheet1
Accession	Dataset Name/Reference
GSE202398	Galdos_Seq_Run1
GSE202398	Galdos_Seq_Run3
GSE202398	Galdos_Seq_Run2
GSE126128	deSoysa etal
GSE131181	Hill etal
E-MTAB-6967	Pijuan Sala etal
GSE150202	Drakhlis etal
