# Supplementary material for: Combined lineage tracing and scRNA-seq reveals unexpected first heart field predominance of human iPSC differentiation
Source: eLife. 2023 Jun 7;12:e80075. doi: 10.7554/eLife.80075 (PMC10348749; doi:10.7554/eLife.80075)
Supplement: Figure 4—source data 2. [file elife-80075-fig4-data2.xlsx]

## Sheet: Table 5
gene	avg_log2FC	pct.1	pct.2	p_val_adj	cluster	gene
MIXL1	2.89762	0.99	0.215	0	Early Primitive Streak	MIXL1
TUBB2B	2.42624	0.999	0.584	0	Early Primitive Streak	TUBB2B
GAL	2.22657	0.984	0.225	0	Early Primitive Streak	GAL
TUBB2A	2.16775	0.998	0.468	0	Early Primitive Streak	TUBB2A
POU5F1	2.0599	0.998	0.341	0	Early Primitive Streak	POU5F1
NODAL	1.78527	0.968	0.155	0	Early Primitive Streak	NODAL
LINC01356	1.68714	0.986	0.272	0	Early Primitive Streak	LINC01356
DPPA4	1.65174	0.997	0.371	0	Early Primitive Streak	DPPA4
CNTNAP2	1.63856	0.998	0.503	0	Early Primitive Streak	CNTNAP2
SFRP2	1.56253	0.991	0.244	0	Early Primitive Streak	SFRP2
L1TD1	1.56076	0.999	0.476	0	Early Primitive Streak	L1TD1
VAMP8	1.52354	0.986	0.362	0	Early Primitive Streak	VAMP8
DDX21	1.47713	0.996	0.714	0	Early Primitive Streak	DDX21
IER3	1.43545	0.967	0.426	0	Early Primitive Streak	IER3
PTPRZ1	1.36749	0.98	0.319	0	Early Primitive Streak	PTPRZ1
CD9	1.32637	0.972	0.247	0	Early Primitive Streak	CD9
ESRG	1.28875	0.977	0.192	0	Early Primitive Streak	ESRG
MSH2	1.26963	0.992	0.575	0	Early Primitive Streak	MSH2
AC009446.1	1.25809	0.92	0.138	0	Early Primitive Streak	AC009446.1
EOMES	1.24448	0.888	0.124	0	Early Primitive Streak	EOMES
FABP5	1.22514	0.994	0.696	0	Early Primitive Streak	FABP5
FOXH1	1.20979	0.991	0.474	0	Early Primitive Streak	FOXH1
CRABP1	1.19689	0.971	0.297	0	Early Primitive Streak	CRABP1
NPM3	1.18939	0.966	0.483	0	Early Primitive Streak	NPM3
FGF4	1.18089	0.657	0.038	0	Early Primitive Streak	FGF4
TDGF1	1.13841	0.958	0.242	0	Early Primitive Streak	TDGF1
FST	1.12198	0.835	0.262	0	Early Primitive Streak	FST
SCG3	1.12165	0.919	0.165	0	Early Primitive Streak	SCG3
IFITM1	1.11664	0.959	0.334	0	Early Primitive Streak	IFITM1
CDA	1.11576	0.845	0.113	0	Early Primitive Streak	CDA
DKK4	1.1065	0.288	0.033	0	Early Primitive Streak	DKK4
SLIRP	1.08723	0.998	0.884	0	Early Primitive Streak	SLIRP
SET	1.07614	1	0.985	0	Early Primitive Streak	SET
MDN1	1.07468	0.968	0.519	0	Early Primitive Streak	MDN1
HMGB3	1.06103	0.995	0.709	0	Early Primitive Streak	HMGB3
TOMM7	1.05921	0.999	0.957	0	Early Primitive Streak	TOMM7
C1QBP	1.03482	0.998	0.825	0	Early Primitive Streak	C1QBP
IGFBP2	1.0337	0.998	0.802	0	Early Primitive Streak	IGFBP2
PCDH10	1.02661	0.852	0.26	0	Early Primitive Streak	PCDH10
CBR1	0.990776	0.911	0.403	0	Early Primitive Streak	CBR1
SP5	0.984251	0.857	0.109	0	Early Primitive Streak	SP5
SEMA6A	0.977237	0.939	0.438	0	Early Primitive Streak	SEMA6A
CLDN7	0.960634	0.888	0.209	0	Early Primitive Streak	CLDN7
TUBB3	0.941663	0.886	0.31	0	Early Primitive Streak	TUBB3
ZIC2	0.939099	0.862	0.202	0	Early Primitive Streak	ZIC2
SEPHS1	0.927944	0.966	0.471	0	Early Primitive Streak	SEPHS1
EIF5A	0.92793	0.994	0.775	0	Early Primitive Streak	EIF5A
CTSC	0.917891	0.967	0.537	0	Early Primitive Streak	CTSC
EPCAM	0.908928	0.982	0.389	0	Early Primitive Streak	EPCAM
PA2G4	0.907795	0.999	0.922	0	Early Primitive Streak	PA2G4
NEFL	0.89927	0.755	0.149	0	Early Primitive Streak	NEFL
GSC	0.895433	0.659	0.061	0	Early Primitive Streak	GSC
PAICS	0.880299	0.994	0.773	0	Early Primitive Streak	PAICS
CCND1	0.880215	0.977	0.608	0	Early Primitive Streak	CCND1
WDR43	0.868239	0.978	0.641	0	Early Primitive Streak	WDR43
NUDT15	0.865956	0.859	0.35	0	Early Primitive Streak	NUDT15
PSAT1	0.864796	0.9	0.412	0	Early Primitive Streak	PSAT1
HNRNPM	0.863579	0.997	0.893	0	Early Primitive Streak	HNRNPM
GNL3	0.862087	0.98	0.668	0	Early Primitive Streak	GNL3
HMGA1	0.861103	1	0.913	0	Early Primitive Streak	HMGA1
HSPE1	0.858114	0.998	0.899	0	Early Primitive Streak	HSPE1
NARS	0.856789	0.992	0.847	0	Early Primitive Streak	NARS
HSPD1	0.856293	1	0.988	0	Early Primitive Streak	HSPD1
SERBP1	0.856192	1	0.991	0	Early Primitive Streak	SERBP1
DKC1	0.854722	0.954	0.569	0	Early Primitive Streak	DKC1
CDH1	0.854019	0.875	0.229	0	Early Primitive Streak	CDH1
EIF3A	0.853266	0.998	0.957	0	Early Primitive Streak	EIF3A
NCL	0.847774	0.999	0.988	0	Early Primitive Streak	NCL
TKT	0.843295	0.998	0.838	0	Early Primitive Streak	TKT
PPA1	0.838762	0.99	0.766	0	Early Primitive Streak	PPA1
HSD17B4	0.831969	0.951	0.595	0	Early Primitive Streak	HSD17B4
IGFBPL1	0.831603	0.638	0.118	0	Early Primitive Streak	IGFBPL1
NASP	0.821229	0.999	0.913	0	Early Primitive Streak	NASP
PMAIP1	0.808717	0.852	0.22	0	Early Primitive Streak	PMAIP1
RANBP1	0.799907	0.998	0.82	0	Early Primitive Streak	RANBP1
NEFM	0.799708	0.695	0.116	0	Early Primitive Streak	NEFM
TUBA1C	0.799167	0.977	0.591	0	Early Primitive Streak	TUBA1C
SNRPD1	0.798008	0.995	0.796	0	Early Primitive Streak	SNRPD1
SNRPB	0.793365	0.997	0.846	0	Early Primitive Streak	SNRPB
PEBP1	0.7919	0.998	0.919	0	Early Primitive Streak	PEBP1
LIN28A	0.790504	0.987	0.599	0	Early Primitive Streak	LIN28A
DNMT3B	0.785154	0.883	0.268	0	Early Primitive Streak	DNMT3B
TOMM40	0.78127	0.968	0.647	0	Early Primitive Streak	TOMM40
NPM1	0.780574	0.999	0.994	0	Early Primitive Streak	NPM1
NOP56	0.779713	0.984	0.731	0	Early Primitive Streak	NOP56
TIMM13	0.774058	0.998	0.888	0	Early Primitive Streak	TIMM13
GSTP1	0.7734	0.999	0.976	0	Early Primitive Streak	GSTP1
PABPC1	0.771253	0.999	0.955	0	Early Primitive Streak	PABPC1
DEK	0.763851	0.999	0.917	0	Early Primitive Streak	DEK
PRELID1	0.76345	0.997	0.831	0	Early Primitive Streak	PRELID1
NANOG	0.758285	0.731	0.11	0	Early Primitive Streak	NANOG
SNRPN	0.755043	0.996	0.889	0	Early Primitive Streak	SNRPN
XRCC5	0.744333	0.998	0.952	0	Early Primitive Streak	XRCC5
SNHG5	0.743278	0.997	0.858	0	Early Primitive Streak	SNHG5
LRPPRC	0.74185	0.992	0.823	0	Early Primitive Streak	LRPPRC
NME1	0.740359	0.978	0.698	0	Early Primitive Streak	NME1
DDT	0.738745	0.993	0.811	0	Early Primitive Streak	DDT
PSIP1	0.736614	0.997	0.856	0	Early Primitive Streak	PSIP1
MIR302CHG	0.733819	0.858	0.273	0	Early Primitive Streak	MIR302CHG
FBL	0.733099	0.995	0.801	0	Early Primitive Streak	FBL
MCM4	0.729984	0.916	0.471	0	Early Primitive Streak	MCM4
SNRPG	0.729058	0.993	0.811	0	Early Primitive Streak	SNRPG
PTMA	0.72892	1	0.997	0	Early Primitive Streak	PTMA
PMEPA1	0.727796	0.772	0.237	0	Early Primitive Streak	PMEPA1
RPL12	0.724663	1	0.996	0	Early Primitive Streak	RPL12
OIP5-AS1	0.723798	0.979	0.731	0	Early Primitive Streak	OIP5-AS1
CER1	0.717843	0.505	0.055	0	Early Primitive Streak	CER1
NUDCD1	0.717166	0.85	0.387	0	Early Primitive Streak	NUDCD1
PDCD11	0.716903	0.918	0.523	0	Early Primitive Streak	PDCD11
RPF2	0.716116	0.923	0.538	0	Early Primitive Streak	RPF2
RAN	0.710628	0.999	0.953	0	Early Primitive Streak	RAN
CCT5	0.707957	0.995	0.852	0	Early Primitive Streak	CCT5
PCSK1	0.707028	0.587	0.032	0	Early Primitive Streak	PCSK1
SRM	0.706706	0.958	0.6	0	Early Primitive Streak	SRM
SLC39A10	0.706195	0.988	0.764	0	Early Primitive Streak	SLC39A10
ENY2	0.704863	0.99	0.827	0	Early Primitive Streak	ENY2
GGCT	0.699436	0.977	0.687	0	Early Primitive Streak	GGCT
DSEL	0.69817	0.798	0.249	0	Early Primitive Streak	DSEL
NHP2	0.693747	0.99	0.791	0	Early Primitive Streak	NHP2
TALDO1	0.693364	0.976	0.719	0	Early Primitive Streak	TALDO1
AL353747.4	0.689485	0.647	0.087	0	Early Primitive Streak	AL353747.4
GSTO1	0.689172	0.996	0.867	0	Early Primitive Streak	GSTO1
UCHL1	0.683589	0.943	0.452	0	Early Primitive Streak	UCHL1
LARS	0.682762	0.993	0.822	0	Early Primitive Streak	LARS
MTHFD2	0.682681	0.938	0.521	0	Early Primitive Streak	MTHFD2
EIF4A1	0.681302	1	0.972	0	Early Primitive Streak	EIF4A1
MCM3	0.674568	0.967	0.571	0	Early Primitive Streak	MCM3
HSP90AB1	0.670291	1	0.997	0	Early Primitive Streak	HSP90AB1
DENR	0.66366	0.983	0.772	0	Early Primitive Streak	DENR
YWHAB	0.661893	0.998	0.882	0	Early Primitive Streak	YWHAB
RARRES2	0.661205	0.859	0.294	0	Early Primitive Streak	RARRES2
CDT1	0.66003	0.842	0.346	0	Early Primitive Streak	CDT1
EIF3K	0.651009	0.999	0.952	0	Early Primitive Streak	EIF3K
PUM3	0.647684	0.949	0.601	0	Early Primitive Streak	PUM3
LINC00458	0.643911	0.619	0.146	0	Early Primitive Streak	LINC00458
PTGES3	0.643283	0.998	0.943	0	Early Primitive Streak	PTGES3
XRN2	0.640685	0.992	0.826	0	Early Primitive Streak	XRN2
FOXA2	0.63293	0.648	0.133	0	Early Primitive Streak	FOXA2
IL17RD	0.627721	0.725	0.216	0	Early Primitive Streak	IL17RD
C20orf27	0.60987	0.85	0.379	0	Early Primitive Streak	C20orf27
PAK1IP1	0.606662	0.803	0.355	0	Early Primitive Streak	PAK1IP1
NUDT1	0.602524	0.903	0.468	0	Early Primitive Streak	NUDT1
FOXD3-AS1	0.598902	0.675	0.113	0	Early Primitive Streak	FOXD3-AS1
IQGAP2	0.597847	0.744	0.238	0	Early Primitive Streak	IQGAP2
TBCA	0.597496	0.999	0.956	0	Early Primitive Streak	TBCA
PPAT	0.588753	0.864	0.441	0	Early Primitive Streak	PPAT
LINC00678	0.585874	0.686	0.117	0	Early Primitive Streak	LINC00678
PRKX	0.580976	0.684	0.192	0	Early Primitive Streak	PRKX
CHMP4C	0.579342	0.557	0.123	0	Early Primitive Streak	CHMP4C
ZNF578	0.57874	0.621	0.136	0	Early Primitive Streak	ZNF578
NFE2L3	0.569486	0.65	0.142	0	Early Primitive Streak	NFE2L3
LDB2	0.568158	0.686	0.177	0	Early Primitive Streak	LDB2
LDHB	0.56777	0.999	0.983	0	Early Primitive Streak	LDHB
CHEK1	0.566363	0.854	0.41	0	Early Primitive Streak	CHEK1
RFC2	0.5654	0.825	0.395	0	Early Primitive Streak	RFC2
VRTN	0.560452	0.698	0.178	0	Early Primitive Streak	VRTN
ETV4	0.550975	0.712	0.183	0	Early Primitive Streak	ETV4
AP1M2	0.550197	0.711	0.194	0	Early Primitive Streak	AP1M2
ADD2	0.548681	0.657	0.191	0	Early Primitive Streak	ADD2
TBXT	0.542676	0.544	0.045	0	Early Primitive Streak	TBXT
KIF1A	0.535768	0.657	0.18	0	Early Primitive Streak	KIF1A
CHEK2	0.531658	0.671	0.222	0	Early Primitive Streak	CHEK2
SCGB3A2	0.529849	0.591	0.107	0	Early Primitive Streak	SCGB3A2
SLC7A8	0.520115	0.78	0.274	0	Early Primitive Streak	SLC7A8
VRK1	0.519335	0.804	0.349	0	Early Primitive Streak	VRK1
SNHG25	0.514676	0.81	0.355	0	Early Primitive Streak	SNHG25
GRID2	0.510342	0.604	0.155	0	Early Primitive Streak	GRID2
FGF19	0.509702	0.486	0.046	0	Early Primitive Streak	FGF19
RGS10	0.507592	0.657	0.228	0	Early Primitive Streak	RGS10
BOP1	0.504129	0.708	0.243	0	Early Primitive Streak	BOP1
GAD1	0.495509	0.606	0.1	0	Early Primitive Streak	GAD1
ZNF649	0.493738	0.71	0.268	0	Early Primitive Streak	ZNF649
TUNAR	0.491598	0.609	0.166	0	Early Primitive Streak	TUNAR
PLPP2	0.476162	0.568	0.139	0	Early Primitive Streak	PLPP2
WNT3	0.473504	0.579	0.109	0	Early Primitive Streak	WNT3
FGF8	0.469881	0.542	0.078	0	Early Primitive Streak	FGF8
ESRP1	0.469218	0.659	0.212	0	Early Primitive Streak	ESRP1
RRM2	0.468025	0.698	0.258	0	Early Primitive Streak	RRM2
UTF1	0.450684	0.571	0.111	0	Early Primitive Streak	UTF1
RAB25	0.447793	0.696	0.212	0	Early Primitive Streak	RAB25
LEFTY1	0.447514	0.352	0.029	0	Early Primitive Streak	LEFTY1
ZSCAN10	0.444783	0.583	0.121	0	Early Primitive Streak	ZSCAN10
AL591742.2	0.441483	0.419	0.066	0	Early Primitive Streak	AL591742.2
USP44	0.441063	0.656	0.193	0	Early Primitive Streak	USP44
SPINT1	0.43835	0.673	0.22	0	Early Primitive Streak	SPINT1
AC064802.1	0.425613	0.47	0.071	0	Early Primitive Streak	AC064802.1
SOX2	0.417165	0.57	0.133	0	Early Primitive Streak	SOX2
MAP7	0.416686	0.631	0.215	0	Early Primitive Streak	MAP7
CORO2A	0.415986	0.576	0.173	0	Early Primitive Streak	CORO2A
GPR160	0.415394	0.506	0.111	0	Early Primitive Streak	GPR160
CYP1B1	0.412587	0.408	0.075	0	Early Primitive Streak	CYP1B1
GRM4	0.408476	0.442	0.052	0	Early Primitive Streak	GRM4
CYP2S1	0.408028	0.559	0.146	0	Early Primitive Streak	CYP2S1
GNAL	0.404196	0.557	0.169	0	Early Primitive Streak	GNAL
PIK3CB	0.402004	0.584	0.193	0	Early Primitive Streak	PIK3CB
AL117378.1	0.399125	0.484	0.095	0	Early Primitive Streak	AL117378.1
SNHG4	0.398141	0.481	0.116	0	Early Primitive Streak	SNHG4
B3GNT7	0.396169	0.446	0.086	0	Early Primitive Streak	B3GNT7
TESMIN	0.385045	0.501	0.126	0	Early Primitive Streak	TESMIN
SALL3	0.382462	0.518	0.143	0	Early Primitive Streak	SALL3
DCLK1	0.375951	0.439	0.064	0	Early Primitive Streak	DCLK1
AC005062.1	0.371519	0.451	0.093	0	Early Primitive Streak	AC005062.1
RGS16	0.361357	0.421	0.104	0	Early Primitive Streak	RGS16
ADCY2	0.358493	0.472	0.109	0	Early Primitive Streak	ADCY2
SCNN1A	0.355232	0.463	0.11	0	Early Primitive Streak	SCNN1A
PRAC1	0.353776	0.438	0.098	0	Early Primitive Streak	PRAC1
SHISAL2B	0.348148	0.544	0.142	0	Early Primitive Streak	SHISAL2B
SYT6	0.347174	0.443	0.11	0	Early Primitive Streak	SYT6
MUC3A	0.34683	0.396	0.051	0	Early Primitive Streak	MUC3A
FOXB1	0.334113	0.363	0.049	0	Early Primitive Streak	FOXB1
TRIM36	0.330482	0.384	0.059	0	Early Primitive Streak	TRIM36
POLR3G	0.32911	0.607	0.181	0	Early Primitive Streak	POLR3G
MACC1	0.324145	0.362	0.063	0	Early Primitive Streak	MACC1
SHISA9	0.320784	0.433	0.09	0	Early Primitive Streak	SHISA9
STON2	0.30325	0.392	0.076	0	Early Primitive Streak	STON2
GDF3	0.297616	0.34	0.047	0	Early Primitive Streak	GDF3
AP000459.2	0.297434	0.353	0.056	0	Early Primitive Streak	AP000459.2
AP000688.2	0.271166	0.339	0.057	0	Early Primitive Streak	AP000688.2
EVX1	0.269814	0.297	0.023	0	Early Primitive Streak	EVX1
AL512358.2	0.260999	0.282	0.03	0	Early Primitive Streak	AL512358.2
LARGE2	0.258277	0.319	0.048	0	Early Primitive Streak	LARGE2
ATP5PD	0.614224	0.994	0.879	3.68e-303	Early Primitive Streak	ATP5PD
NLGN4X	0.381779	0.503	0.147	6.46e-303	Early Primitive Streak	NLGN4X
GART	0.619952	0.888	0.494	1.72e-302	Early Primitive Streak	GART
EPHA1	0.256123	0.372	0.085	1.8e-302	Early Primitive Streak	EPHA1
GPATCH4	0.600553	0.86	0.421	4.6e-302	Early Primitive Streak	GPATCH4
RBMX	0.649952	0.999	0.922	4.99e-302	Early Primitive Streak	RBMX
HPDL	0.273112	0.321	0.066	1.67e-300	Early Primitive Streak	HPDL
PSMD14	0.644008	0.963	0.644	2.24e-299	Early Primitive Streak	PSMD14
ATXN7L1	0.308144	0.465	0.131	1.48e-298	Early Primitive Streak	ATXN7L1
CAPG	0.412986	0.624	0.221	4.32e-298	Early Primitive Streak	CAPG
MND1	0.451896	0.734	0.294	2.41e-297	Early Primitive Streak	MND1
GAP43	0.425818	0.644	0.231	1.22e-296	Early Primitive Streak	GAP43
UGT8	0.274141	0.376	0.089	1.94e-296	Early Primitive Streak	UGT8
HNRNPA3	0.625801	0.999	0.953	2.63e-296	Early Primitive Streak	HNRNPA3
DHCR24	0.59248	0.78	0.362	3.05e-296	Early Primitive Streak	DHCR24
DUT	0.729023	0.959	0.633	5.35e-296	Early Primitive Streak	DUT
CCT8	0.584386	0.998	0.912	4.48e-295	Early Primitive Streak	CCT8
TUBA4A	0.332421	0.429	0.116	1.58e-294	Early Primitive Streak	TUBA4A
SNRPF	0.646575	0.997	0.839	3.03e-293	Early Primitive Streak	SNRPF
RAB38	0.331345	0.441	0.119	2e-292	Early Primitive Streak	RAB38
PREX2	0.350481	0.49	0.145	3.46e-291	Early Primitive Streak	PREX2
KCNG1	0.360962	0.581	0.19	5.22e-290	Early Primitive Streak	KCNG1
MT-ATP6	0.704471	1	0.988	1.24e-289	Early Primitive Streak	MT-ATP6
BAX	0.67941	0.946	0.603	2.21e-289	Early Primitive Streak	BAX
SSBP1	0.619505	0.996	0.867	2.7e-289	Early Primitive Streak	SSBP1
HES6	0.400815	0.536	0.177	2.46e-288	Early Primitive Streak	HES6
EFEMP1	0.283893	0.431	0.115	1.02e-287	Early Primitive Streak	EFEMP1
PSMA2	0.609564	0.996	0.878	1.61e-287	Early Primitive Streak	PSMA2
MGST1	0.623572	0.981	0.61	3.22e-287	Early Primitive Streak	MGST1
SNHG8	0.641136	0.958	0.656	1.04e-286	Early Primitive Streak	SNHG8
SRSF7	0.665241	0.99	0.783	4.58e-286	Early Primitive Streak	SRSF7
BRIX1	0.58139	0.874	0.475	1.59e-285	Early Primitive Streak	BRIX1
DKK1	0.397024	0.387	0.092	2.16e-284	Early Primitive Streak	DKK1
GABRB3	0.332359	0.595	0.192	6.86e-284	Early Primitive Streak	GABRB3
RBP1	0.731117	0.979	0.756	1.35e-283	Early Primitive Streak	RBP1
GJA1	0.650747	0.979	0.609	1.66e-283	Early Primitive Streak	GJA1
IMPA2	0.495323	0.76	0.332	6.19e-283	Early Primitive Streak	IMPA2
PSMG4	0.502694	0.756	0.343	6.76e-283	Early Primitive Streak	PSMG4
RFC3	0.504959	0.809	0.37	2.21e-282	Early Primitive Streak	RFC3
SUPT16H	0.635523	0.994	0.863	1.99e-280	Early Primitive Streak	SUPT16H
HSP90AA1	0.541224	1	0.992	1.25e-279	Early Primitive Streak	HSP90AA1
ATP5ME	0.541988	0.999	0.982	7.48e-279	Early Primitive Streak	ATP5ME
TPD52	0.490496	0.781	0.359	9.74e-279	Early Primitive Streak	TPD52
NOC3L	0.514067	0.785	0.38	3.19e-278	Early Primitive Streak	NOC3L
RBM8A	0.589861	0.996	0.876	4.88e-278	Early Primitive Streak	RBM8A
WDR4	0.315517	0.462	0.14	7.31e-277	Early Primitive Streak	WDR4
TEX10	0.44871	0.725	0.318	3.48e-276	Early Primitive Streak	TEX10
LMNB1	0.618894	0.922	0.536	4.46e-276	Early Primitive Streak	LMNB1
TCOF1	0.582341	0.877	0.496	1.11e-275	Early Primitive Streak	TCOF1
CAMKK2	0.391151	0.53	0.181	1.97e-275	Early Primitive Streak	CAMKK2
SAT1	0.934934	0.822	0.433	2.27e-275	Early Primitive Streak	SAT1
KNOP1	0.623759	0.989	0.717	8.17e-275	Early Primitive Streak	KNOP1
CSKMT	0.371606	0.607	0.219	8.53e-275	Early Primitive Streak	CSKMT
EEF2	0.487391	1	0.983	1.01e-274	Early Primitive Streak	EEF2
TUBB	0.574867	1	0.964	1.69e-274	Early Primitive Streak	TUBB
HIST1H4C	1.0179	0.992	0.924	2.15e-274	Early Primitive Streak	HIST1H4C
CD3EAP	0.439078	0.666	0.27	2.53e-274	Early Primitive Streak	CD3EAP
NMT1	0.593436	0.967	0.681	1.86e-273	Early Primitive Streak	NMT1
PRKDC	0.605541	0.995	0.899	2.65e-273	Early Primitive Streak	PRKDC
DANCR	0.615444	0.989	0.755	1.03e-270	Early Primitive Streak	DANCR
ARFGEF3	0.287837	0.404	0.109	8.27e-270	Early Primitive Streak	ARFGEF3
PPM1G	0.6209	0.993	0.831	1.58e-269	Early Primitive Streak	PPM1G
MT-CO3	0.650224	1	0.991	1.79e-269	Early Primitive Streak	MT-CO3
GCSH	0.607511	0.985	0.752	3e-269	Early Primitive Streak	GCSH
DDX18	0.59387	0.988	0.809	2.16e-267	Early Primitive Streak	DDX18
SNRPA	0.596592	0.911	0.562	1.24e-266	Early Primitive Streak	SNRPA
NME2	0.497469	1	0.983	1.52e-265	Early Primitive Streak	NME2
KHDRBS3	0.333411	0.568	0.195	2.62e-265	Early Primitive Streak	KHDRBS3
RPL8	0.408783	1	0.997	4.8e-264	Early Primitive Streak	RPL8
SERPINB9	0.553343	0.834	0.401	1.11e-263	Early Primitive Streak	SERPINB9
RFC4	0.481951	0.785	0.37	3e-263	Early Primitive Streak	RFC4
RAC3	0.526339	0.85	0.439	3.18e-263	Early Primitive Streak	RAC3
TSR1	0.588787	0.884	0.528	6.05e-263	Early Primitive Streak	TSR1
ADSL	0.588875	0.937	0.618	1.23e-262	Early Primitive Streak	ADSL
IDH1	0.631948	0.922	0.559	3.11e-262	Early Primitive Streak	IDH1
APRT	0.627948	0.992	0.804	4.2e-262	Early Primitive Streak	APRT
MPHOSPH6	0.435527	0.709	0.306	1.19e-261	Early Primitive Streak	MPHOSPH6
EIF2S2	0.570968	0.998	0.921	4.7e-261	Early Primitive Streak	EIF2S2
CCT6A	0.538935	0.995	0.918	8.33e-260	Early Primitive Streak	CCT6A
HMGB1	0.617295	1	0.984	1.97e-259	Early Primitive Streak	HMGB1
ZFP42	0.288268	0.465	0.134	4.39e-259	Early Primitive Streak	ZFP42
NOP58	0.620426	0.937	0.617	7.58e-259	Early Primitive Streak	NOP58
EEF1A1	0.361784	1	1	2.87e-258	Early Primitive Streak	EEF1A1
CENPH	0.493928	0.867	0.438	3.58e-258	Early Primitive Streak	CENPH
MYSM1	0.566846	0.816	0.434	4.22e-258	Early Primitive Streak	MYSM1
CCDC169	0.294232	0.459	0.138	8.95e-258	Early Primitive Streak	CCDC169
HNRNPD	0.582574	0.998	0.928	1.04e-255	Early Primitive Streak	HNRNPD
MTFP1	0.563893	0.846	0.462	5.15e-255	Early Primitive Streak	MTFP1
STC1	0.529065	0.656	0.268	8.05e-255	Early Primitive Streak	STC1
MRPS5	0.599739	0.952	0.679	1.38e-253	Early Primitive Streak	MRPS5
PHB2	0.572187	0.989	0.819	1.8e-252	Early Primitive Streak	PHB2
PLAAT3	0.518533	0.725	0.321	1.99e-252	Early Primitive Streak	PLAAT3
LIMA1	0.544702	0.79	0.384	3.7e-252	Early Primitive Streak	LIMA1
NOLC1	0.577376	0.898	0.542	7.12e-250	Early Primitive Streak	NOLC1
PGAM1	0.571298	0.992	0.834	3.24e-249	Early Primitive Streak	PGAM1
PDAP1	0.545089	0.992	0.85	1.58e-248	Early Primitive Streak	PDAP1
MAD2L2	0.537442	0.904	0.519	3.26e-248	Early Primitive Streak	MAD2L2
MAL2	0.297086	0.551	0.181	4.84e-248	Early Primitive Streak	MAL2
RPS29	0.402492	1	0.997	1.46e-247	Early Primitive Streak	RPS29
NMU	0.271271	0.443	0.131	2.72e-247	Early Primitive Streak	NMU
CYCS	0.626289	0.992	0.786	3.29e-247	Early Primitive Streak	CYCS
POLR2H	0.556922	0.936	0.595	4.93e-247	Early Primitive Streak	POLR2H
ATIC	0.514876	0.875	0.488	1.57e-246	Early Primitive Streak	ATIC
TUFM	0.578304	0.981	0.801	2.41e-245	Early Primitive Streak	TUFM
MTHFD1	0.442007	0.738	0.343	1.62e-244	Early Primitive Streak	MTHFD1
ALDH3A2	0.51555	0.867	0.481	2.24e-244	Early Primitive Streak	ALDH3A2
LSM4	0.577963	0.992	0.81	6.38e-244	Early Primitive Streak	LSM4
SERPINE2	0.32905	0.946	0.552	3.08e-243	Early Primitive Streak	SERPINE2
ABCF1	0.567048	0.982	0.795	7.16e-243	Early Primitive Streak	ABCF1
METTL8	0.389811	0.612	0.248	1.33e-242	Early Primitive Streak	METTL8
SLC25A39	0.537928	0.9	0.544	2.04e-242	Early Primitive Streak	SLC25A39
RSL1D1	0.546983	0.989	0.833	3.88e-242	Early Primitive Streak	RSL1D1
WDR45B	0.597849	0.946	0.691	5.34e-242	Early Primitive Streak	WDR45B
IMPDH2	0.570518	0.981	0.778	8.06e-242	Early Primitive Streak	IMPDH2
SNHG3	0.451429	0.738	0.345	8.49e-242	Early Primitive Streak	SNHG3
PHB	0.551661	0.995	0.85	1.22e-240	Early Primitive Streak	PHB
RPSA	0.468358	1	0.995	1.34e-240	Early Primitive Streak	RPSA
PPIA	0.432559	0.999	0.985	1.83e-240	Early Primitive Streak	PPIA
DNA2	0.333869	0.553	0.202	1.4e-239	Early Primitive Streak	DNA2
MCM7	0.512615	0.895	0.489	2.52e-239	Early Primitive Streak	MCM7
AXIN2	0.262813	0.369	0.099	5.59e-239	Early Primitive Streak	AXIN2
RBM47	0.308947	0.542	0.186	1.42e-238	Early Primitive Streak	RBM47
MITD1	0.459491	0.803	0.407	9.25e-238	Early Primitive Streak	MITD1
BCL2L12	0.471919	0.825	0.43	8.14e-237	Early Primitive Streak	BCL2L12
RTKN2	0.345629	0.562	0.209	1.11e-236	Early Primitive Streak	RTKN2
PNP	0.418951	0.623	0.259	1.1e-235	Early Primitive Streak	PNP
NIFK	0.539672	0.954	0.64	1.15e-235	Early Primitive Streak	NIFK
HEBP2	0.596321	0.96	0.712	1.91e-235	Early Primitive Streak	HEBP2
DBNDD1	0.292059	0.423	0.132	2.04e-235	Early Primitive Streak	DBNDD1
ALPL	0.268789	0.478	0.151	4.17e-235	Early Primitive Streak	ALPL
MT-ATP8	0.62538	0.98	0.774	4.76e-235	Early Primitive Streak	MT-ATP8
LINC00467	0.385576	0.673	0.285	1.35e-234	Early Primitive Streak	LINC00467
CMSS1	0.541233	0.915	0.582	2.72e-234	Early Primitive Streak	CMSS1
MRPL3	0.564615	0.943	0.654	8.26e-234	Early Primitive Streak	MRPL3
LSR	0.379116	0.689	0.296	2e-233	Early Primitive Streak	LSR
GSTO2	0.271448	0.4	0.115	2.2e-232	Early Primitive Streak	GSTO2
SRD5A3	0.326901	0.536	0.195	3.08e-232	Early Primitive Streak	SRD5A3
STIL	0.312597	0.477	0.161	4.64e-232	Early Primitive Streak	STIL
ZFAS1	0.508346	0.999	0.955	6e-232	Early Primitive Streak	ZFAS1
LINC01896	0.252131	0.371	0.103	2.24e-231	Early Primitive Streak	LINC01896
MT-ND4	0.515449	1	0.994	5.83e-231	Early Primitive Streak	MT-ND4
DRG1	0.483342	0.824	0.45	8.71e-231	Early Primitive Streak	DRG1
TMA16	0.553706	0.925	0.592	2.83e-230	Early Primitive Streak	TMA16
HELLS	0.524106	0.975	0.583	7.36e-230	Early Primitive Streak	HELLS
SURF6	0.513382	0.877	0.506	2.95e-229	Early Primitive Streak	SURF6
HNRNPAB	0.566685	0.999	0.835	1.17e-228	Early Primitive Streak	HNRNPAB
DDX27	0.525414	0.906	0.565	1.03e-227	Early Primitive Streak	DDX27
CDCA7L	0.461271	0.896	0.504	1.62e-227	Early Primitive Streak	CDCA7L
FANCD2	0.341064	0.588	0.232	2.26e-226	Early Primitive Streak	FANCD2
MRPS34	0.548231	0.986	0.789	3.92e-226	Early Primitive Streak	MRPS34
CEBPZ	0.567678	0.969	0.721	4.91e-226	Early Primitive Streak	CEBPZ
LYAR	0.475956	0.763	0.384	3.79e-225	Early Primitive Streak	LYAR
MYBL2	0.388546	0.692	0.297	9.53e-225	Early Primitive Streak	MYBL2
BCCIP	0.49396	0.886	0.533	4.06e-224	Early Primitive Streak	BCCIP
ZWINT	0.372486	0.68	0.294	6.28e-224	Early Primitive Streak	ZWINT
POLR1D	0.521567	0.989	0.815	2.5e-223	Early Primitive Streak	POLR1D
CD200	0.308143	0.531	0.192	8.29e-223	Early Primitive Streak	CD200
CDC20	0.38633	0.703	0.299	2.2e-222	Early Primitive Streak	CDC20
PUS7	0.422288	0.693	0.321	6.51e-222	Early Primitive Streak	PUS7
CCT4	0.523761	0.991	0.88	7.58e-222	Early Primitive Streak	CCT4
SF3A3	0.53437	0.897	0.571	1.29e-221	Early Primitive Streak	SF3A3
RPL35	0.351416	1	0.997	1.69e-221	Early Primitive Streak	RPL35
ABRACL	0.461136	0.803	0.405	8.38e-221	Early Primitive Streak	ABRACL
MT-ND3	0.55955	0.999	0.989	1.65e-220	Early Primitive Streak	MT-ND3
ENSA	0.522195	0.943	0.629	1.65e-220	Early Primitive Streak	ENSA
ACOT7	0.377286	0.653	0.292	1.73e-220	Early Primitive Streak	ACOT7
RUVBL1	0.554039	0.934	0.629	2.32e-220	Early Primitive Streak	RUVBL1
SPART	0.549369	0.934	0.62	4.16e-220	Early Primitive Streak	SPART
RNPS1	0.517895	0.975	0.769	5.18e-219	Early Primitive Streak	RNPS1
PSMA3	0.537423	0.972	0.726	3.38e-218	Early Primitive Streak	PSMA3
FCF1	0.377802	0.668	0.296	4.85e-218	Early Primitive Streak	FCF1
SNHG19	0.42797	0.692	0.317	5.21e-218	Early Primitive Streak	SNHG19
HNRNPA2B1	0.536857	0.998	0.978	1.45e-217	Early Primitive Streak	HNRNPA2B1
RPL41	0.328638	1	0.999	5.22e-216	Early Primitive Streak	RPL41
TPM3	0.559161	0.996	0.87	1.26e-215	Early Primitive Streak	TPM3
PPT1	0.422553	0.742	0.371	1.4e-215	Early Primitive Streak	PPT1
MIS18A	0.418308	0.791	0.394	3.87e-215	Early Primitive Streak	MIS18A
PNO1	0.434763	0.758	0.387	5.1e-215	Early Primitive Streak	PNO1
INTS13	0.369835	0.615	0.268	1.12e-214	Early Primitive Streak	INTS13
CENPU	0.411581	0.751	0.348	1.47e-214	Early Primitive Streak	CENPU
DHX37	0.28934	0.46	0.16	2.33e-213	Early Primitive Streak	DHX37
NCBP2	0.50829	0.94	0.648	3.94e-213	Early Primitive Streak	NCBP2
APEX1	0.507842	0.997	0.894	5.7e-213	Early Primitive Streak	APEX1
SLC39A1	0.486234	0.858	0.492	1.06e-212	Early Primitive Streak	SLC39A1
CHAF1A	0.418523	0.739	0.341	1.87e-212	Early Primitive Streak	CHAF1A
HSPA8	0.565552	0.998	0.887	2.72e-212	Early Primitive Streak	HSPA8
UTP18	0.435004	0.795	0.412	3.27e-212	Early Primitive Streak	UTP18
DAZAP1	0.460027	0.846	0.476	4.15e-212	Early Primitive Streak	DAZAP1
H2AFZ	0.535326	0.998	0.918	1.63e-211	Early Primitive Streak	H2AFZ
CENPK	0.366574	0.679	0.297	2.4e-211	Early Primitive Streak	CENPK
F11R	0.446022	0.839	0.446	4.74e-211	Early Primitive Streak	F11R
TCF4	0.526314	0.939	0.643	7.61e-210	Early Primitive Streak	TCF4
PLSCR1	0.341304	0.568	0.23	3.49e-209	Early Primitive Streak	PLSCR1
BUB1	0.405614	0.679	0.302	5.91e-209	Early Primitive Streak	BUB1
FAM174C	0.419455	0.771	0.396	1.08e-208	Early Primitive Streak	FAM174C
ARRB1	0.287686	0.436	0.148	2.26e-208	Early Primitive Streak	ARRB1
NR6A1	0.450647	0.853	0.437	7.91e-208	Early Primitive Streak	NR6A1
EMG1	0.405809	0.688	0.334	1.25e-207	Early Primitive Streak	EMG1
NAT10	0.360887	0.616	0.268	9.01e-207	Early Primitive Streak	NAT10
DMKN	0.508288	0.96	0.638	1.95e-206	Early Primitive Streak	DMKN
TPST2	0.326847	0.583	0.241	2.29e-206	Early Primitive Streak	TPST2
CLDN6	0.494386	0.955	0.592	5.76e-206	Early Primitive Streak	CLDN6
RRP1B	0.485175	0.869	0.516	6.95e-206	Early Primitive Streak	RRP1B
AP2B1	0.478952	0.981	0.778	1.79e-203	Early Primitive Streak	AP2B1
PFN1	0.453274	0.999	0.97	7.54e-203	Early Primitive Streak	PFN1
NOB1	0.430915	0.835	0.466	3.44e-202	Early Primitive Streak	NOB1
RPS10	0.483267	0.996	0.856	8.39e-201	Early Primitive Streak	RPS10
TXN	0.508352	0.99	0.813	1.26e-200	Early Primitive Streak	TXN
TXNDC17	0.463318	0.99	0.797	7.69e-200	Early Primitive Streak	TXNDC17
GINS2	0.376665	0.719	0.334	1.06e-199	Early Primitive Streak	GINS2
SRPK1	0.489899	0.936	0.625	3e-199	Early Primitive Streak	SRPK1
PRKD3	0.397916	0.644	0.304	2.59e-198	Early Primitive Streak	PRKD3
EEF1E1	0.475207	0.895	0.546	4.36e-198	Early Primitive Streak	EEF1E1
MAK16	0.357535	0.615	0.276	6.15e-198	Early Primitive Streak	MAK16
CDCA7	0.336138	0.608	0.257	1.17e-197	Early Primitive Streak	CDCA7
DDX31	0.259732	0.43	0.147	2.59e-197	Early Primitive Streak	DDX31
SLC39A8	0.321051	0.637	0.277	2.71e-197	Early Primitive Streak	SLC39A8
SLF1	0.35187	0.596	0.26	3.17e-197	Early Primitive Streak	SLF1
CDC123	0.498487	0.922	0.616	1.89e-196	Early Primitive Streak	CDC123
PINX1	0.349903	0.617	0.276	2.22e-196	Early Primitive Streak	PINX1
PPP1R14B	0.486285	0.995	0.836	1.06e-195	Early Primitive Streak	PPP1R14B
DHRS11	0.255065	0.438	0.152	1.51e-195	Early Primitive Streak	DHRS11
CFAP298	0.488131	0.926	0.598	1.52e-195	Early Primitive Streak	CFAP298
RPS3	0.443857	1	0.996	3.19e-194	Early Primitive Streak	RPS3
NOP16	0.34632	0.592	0.261	3.28e-194	Early Primitive Streak	NOP16
MCM5	0.357002	0.675	0.304	4.16e-194	Early Primitive Streak	MCM5
CSE1L	0.455048	0.873	0.51	5.86e-194	Early Primitive Streak	CSE1L
ZNF208	0.389251	0.38	0.119	1.16e-193	Early Primitive Streak	ZNF208
DLGAP5	0.343836	0.775	0.353	6.32e-193	Early Primitive Streak	DLGAP5
DDX46	0.518845	0.985	0.821	7.88e-193	Early Primitive Streak	DDX46
LSM7	0.50176	0.99	0.824	1.19e-192	Early Primitive Streak	LSM7
PES1	0.339636	0.621	0.281	1.38e-192	Early Primitive Streak	PES1
SSB	0.480403	0.997	0.909	1.56e-192	Early Primitive Streak	SSB
NUP85	0.335231	0.595	0.259	1.99e-192	Early Primitive Streak	NUP85
KIF15	0.295869	0.541	0.213	1.03e-191	Early Primitive Streak	KIF15
YBX1	0.387563	1	0.991	1.22e-191	Early Primitive Streak	YBX1
PLS1	0.273523	0.441	0.158	3.63e-191	Early Primitive Streak	PLS1
EMB	0.278085	0.474	0.177	2.54e-190	Early Primitive Streak	EMB
UTP20	0.357131	0.572	0.249	6.23e-190	Early Primitive Streak	UTP20
ZWILCH	0.33619	0.589	0.257	6.48e-190	Early Primitive Streak	ZWILCH
TACC3	0.361251	0.671	0.299	8.17e-190	Early Primitive Streak	TACC3
EPB41L2	0.483892	0.915	0.562	2.14e-189	Early Primitive Streak	EPB41L2
BLM	0.306599	0.523	0.208	3.31e-189	Early Primitive Streak	BLM
TARS	0.566792	0.96	0.709	8.56e-189	Early Primitive Streak	TARS
TCP1	0.496339	0.963	0.721	2.03e-188	Early Primitive Streak	TCP1
ARHGEF35	0.272094	0.432	0.151	2.44e-188	Early Primitive Streak	ARHGEF35
MRTO4	0.450357	0.838	0.489	2.75e-188	Early Primitive Streak	MRTO4
FEN1	0.346347	0.626	0.28	3.4e-188	Early Primitive Streak	FEN1
EIF1AX	0.488388	0.991	0.837	4.7e-188	Early Primitive Streak	EIF1AX
POMP	0.471736	0.994	0.894	1.52e-187	Early Primitive Streak	POMP
DDX10	0.403884	0.758	0.398	1.98e-187	Early Primitive Streak	DDX10
ANP32B	0.466345	0.997	0.927	5.53e-187	Early Primitive Streak	ANP32B
ZNF724	0.319261	0.613	0.269	1.68e-186	Early Primitive Streak	ZNF724
DCUN1D5	0.490918	0.908	0.607	1.87e-186	Early Primitive Streak	DCUN1D5
CALM1	0.465899	0.998	0.889	1.88e-186	Early Primitive Streak	CALM1
TIMM50	0.423994	0.786	0.445	3.68e-186	Early Primitive Streak	TIMM50
PRDX1	0.26934	1	0.951	1.09e-185	Early Primitive Streak	PRDX1
METAP2	0.408476	0.996	0.937	5.88e-185	Early Primitive Streak	METAP2
HIST1H1A	0.705443	0.645	0.306	1.45e-184	Early Primitive Streak	HIST1H1A
NLN	0.402063	0.809	0.433	1.91e-184	Early Primitive Streak	NLN
COMTD1	0.330368	0.65	0.307	3.78e-184	Early Primitive Streak	COMTD1
EIF5B	0.485214	0.996	0.885	4.93e-184	Early Primitive Streak	EIF5B
CCDC112	0.391866	0.683	0.342	3.35e-183	Early Primitive Streak	CCDC112
WDR74	0.351083	0.688	0.34	8.45e-183	Early Primitive Streak	WDR74
TIMM44	0.414441	0.821	0.482	2.07e-182	Early Primitive Streak	TIMM44
ESF1	0.482009	0.892	0.579	2.36e-182	Early Primitive Streak	ESF1
ZNF581	0.410818	0.863	0.498	3.4e-182	Early Primitive Streak	ZNF581
RAD51AP1	0.305668	0.675	0.303	6.6e-182	Early Primitive Streak	RAD51AP1
CFDP1	0.441647	0.994	0.916	3.62e-181	Early Primitive Streak	CFDP1
DCAF13	0.455719	0.852	0.516	1.4e-180	Early Primitive Streak	DCAF13
DTL	0.31478	0.508	0.201	2.81e-180	Early Primitive Streak	DTL
BUB1B	0.338058	0.668	0.3	5.1e-180	Early Primitive Streak	BUB1B
CCDC58	0.362097	0.679	0.337	6.89e-180	Early Primitive Streak	CCDC58
RPL38	0.314628	1	0.995	1.3e-179	Early Primitive Streak	RPL38
EIF3I	0.460294	0.979	0.802	1.43e-179	Early Primitive Streak	EIF3I
LIN28B	0.419432	0.871	0.504	1.73e-179	Early Primitive Streak	LIN28B
TMEM147	0.466222	0.947	0.669	3.3e-179	Early Primitive Streak	TMEM147
MYO19	0.255827	0.445	0.165	4.45e-179	Early Primitive Streak	MYO19
MAD2L1	0.350392	0.775	0.381	5.21e-179	Early Primitive Streak	MAD2L1
MCM10	0.292035	0.536	0.216	2.94e-178	Early Primitive Streak	MCM10
MRPS9	0.449048	0.88	0.559	2.96e-178	Early Primitive Streak	MRPS9
ATAD5	0.342543	0.754	0.372	5e-178	Early Primitive Streak	ATAD5
MRPL37	0.412187	0.836	0.497	7.01e-178	Early Primitive Streak	MRPL37
CENPE	0.337365	0.712	0.334	2.32e-177	Early Primitive Streak	CENPE
PHGDH	0.360005	0.987	0.734	2.5e-177	Early Primitive Streak	PHGDH
PPP1CA	0.471141	0.951	0.698	4.3e-177	Early Primitive Streak	PPP1CA
BOLA3	0.429595	0.82	0.469	5.69e-177	Early Primitive Streak	BOLA3
LIAS	0.325083	0.65	0.308	5.7e-177	Early Primitive Streak	LIAS
GRPEL1	0.443801	0.85	0.526	2.2e-176	Early Primitive Streak	GRPEL1
RPL22	0.330743	1	0.996	2.82e-176	Early Primitive Streak	RPL22
ARL2	0.469588	0.981	0.789	8.51e-176	Early Primitive Streak	ARL2
IRX2	0.299459	0.639	0.283	1.8e-175	Early Primitive Streak	IRX2
SINHCAF	0.474572	0.994	0.821	3.97e-175	Early Primitive Streak	SINHCAF
CCNB1	0.370132	0.79	0.4	4.56e-175	Early Primitive Streak	CCNB1
PABPC4	0.482426	0.964	0.731	4.82e-175	Early Primitive Streak	PABPC4
NLE1	0.254666	0.437	0.163	3.06e-174	Early Primitive Streak	NLE1
IQCB1	0.306659	0.589	0.263	5.42e-174	Early Primitive Streak	IQCB1
BNIP3	0.541512	0.999	0.927	6.09e-174	Early Primitive Streak	BNIP3
C19orf48	0.442862	0.872	0.539	6.55e-174	Early Primitive Streak	C19orf48
SSRP1	0.455383	0.956	0.708	1.3e-173	Early Primitive Streak	SSRP1
MCM6	0.426386	0.716	0.365	3.76e-173	Early Primitive Streak	MCM6
PFDN4	0.433183	0.906	0.602	7.1e-173	Early Primitive Streak	PFDN4
AC006329.1	0.25775	0.503	0.195	4.7e-172	Early Primitive Streak	AC006329.1
DNMT1	0.455108	0.947	0.644	2.85e-171	Early Primitive Streak	DNMT1
CLSPN	0.328831	0.719	0.336	2.89e-171	Early Primitive Streak	CLSPN
PGK1	0.535327	0.998	0.933	7.44e-171	Early Primitive Streak	PGK1
OCIAD2	0.393533	0.806	0.453	4.43e-170	Early Primitive Streak	OCIAD2
NIP7	0.321312	0.628	0.3	4.53e-170	Early Primitive Streak	NIP7
DBNDD2	0.343046	0.679	0.336	8.63e-170	Early Primitive Streak	DBNDD2
DSCC1	0.261068	0.444	0.169	1.38e-169	Early Primitive Streak	DSCC1
MRPL11	0.44727	0.934	0.65	1.49e-169	Early Primitive Streak	MRPL11
AURKAIP1	0.454813	0.995	0.867	3.39e-169	Early Primitive Streak	AURKAIP1
LTV1	0.360252	0.689	0.354	4.3e-169	Early Primitive Streak	LTV1
GNL3L	0.368443	0.752	0.408	1.57e-168	Early Primitive Streak	GNL3L
MAGOH	0.390609	0.837	0.49	1.81e-168	Early Primitive Streak	MAGOH
CCT3	0.425462	0.999	0.913	4.01e-168	Early Primitive Streak	CCT3
MT-ND1	0.433355	0.999	0.993	4.03e-168	Early Primitive Streak	MT-ND1
SMIM4	0.386824	0.793	0.446	9.08e-168	Early Primitive Streak	SMIM4
STRBP	0.417971	0.874	0.536	2.1e-167	Early Primitive Streak	STRBP
HMGN1	0.393969	0.999	0.977	4.49e-167	Early Primitive Streak	HMGN1
GAS5	0.415404	0.998	0.93	6e-167	Early Primitive Streak	GAS5
SRSF3	0.478759	0.996	0.897	1.26e-166	Early Primitive Streak	SRSF3
MYEF2	0.408493	0.777	0.431	1.74e-166	Early Primitive Streak	MYEF2
UROD	0.414435	0.838	0.505	2.61e-166	Early Primitive Streak	UROD
ANP32A	0.46207	0.993	0.89	3.67e-166	Early Primitive Streak	ANP32A
MYBBP1A	0.289555	0.5	0.215	5.18e-166	Early Primitive Streak	MYBBP1A
PHC1	0.324913	0.682	0.337	5.33e-166	Early Primitive Streak	PHC1
SNRPD3	0.437713	0.935	0.677	1.15e-165	Early Primitive Streak	SNRPD3
PDCD2	0.428449	0.84	0.525	1.28e-165	Early Primitive Streak	PDCD2
UTP6	0.353537	0.697	0.362	7.75e-165	Early Primitive Streak	UTP6
WDHD1	0.317411	0.629	0.293	1.99e-164	Early Primitive Streak	WDHD1
ANP32E	0.485989	0.979	0.764	2.42e-164	Early Primitive Streak	ANP32E
METAP1	0.400707	0.832	0.506	2.94e-164	Early Primitive Streak	METAP1
CRMP1	0.274634	0.539	0.229	1.19e-163	Early Primitive Streak	CRMP1
SHMT2	0.355824	0.802	0.456	2.65e-163	Early Primitive Streak	SHMT2
PAWR	0.453651	0.96	0.693	2.92e-163	Early Primitive Streak	PAWR
POR	0.335356	0.712	0.369	1.89e-162	Early Primitive Streak	POR
KIF20B	0.332198	0.831	0.432	2.12e-162	Early Primitive Streak	KIF20B
STOML2	0.457468	0.969	0.752	3.29e-161	Early Primitive Streak	STOML2
TES	0.396611	0.722	0.399	1.09e-160	Early Primitive Streak	TES
RPS12	0.328407	1	0.998	1.43e-160	Early Primitive Streak	RPS12
GNPNAT1	0.321804	0.741	0.387	3.56e-160	Early Primitive Streak	GNPNAT1
ERP29	0.421003	0.996	0.89	3.86e-160	Early Primitive Streak	ERP29
POLR3K	0.346575	0.722	0.385	3.99e-160	Early Primitive Streak	POLR3K
RPS27	0.321973	1	0.999	8.3e-160	Early Primitive Streak	RPS27
FXYD5	0.324807	0.734	0.366	8.9e-160	Early Primitive Streak	FXYD5
NXN	0.422397	0.859	0.552	2.44e-159	Early Primitive Streak	NXN
MID1IP1	0.319164	0.616	0.292	9.18e-159	Early Primitive Streak	MID1IP1
CCDC85B	0.402579	0.919	0.61	1.51e-158	Early Primitive Streak	CCDC85B
PARP1	0.422287	0.984	0.797	2.5e-158	Early Primitive Streak	PARP1
SALL4	0.298013	0.753	0.371	3.61e-158	Early Primitive Streak	SALL4
MFSD3	0.302911	0.591	0.278	1.44e-157	Early Primitive Streak	MFSD3
UTP11	0.408158	0.875	0.567	4.39e-157	Early Primitive Streak	UTP11
HSPA9	0.45554	0.972	0.775	5.46e-157	Early Primitive Streak	HSPA9
VARS	0.303315	0.598	0.288	7.37e-157	Early Primitive Streak	VARS
YEATS4	0.358694	0.739	0.407	3.66e-156	Early Primitive Streak	YEATS4
CAD	0.254437	0.483	0.205	6.08e-155	Early Primitive Streak	CAD
RNF145	0.352333	0.757	0.427	1.42e-154	Early Primitive Streak	RNF145
PELP1	0.375642	0.783	0.457	1.62e-154	Early Primitive Streak	PELP1
CFL1	0.383316	1	0.968	2.58e-154	Early Primitive Streak	CFL1
TFRC	0.532117	0.734	0.428	8.88e-154	Early Primitive Streak	TFRC
DUSP23	0.333462	0.608	0.297	3.32e-153	Early Primitive Streak	DUSP23
NIPA2	0.354688	0.642	0.339	8.42e-153	Early Primitive Streak	NIPA2
ILF3	0.43035	0.987	0.839	1.19e-152	Early Primitive Streak	ILF3
ZNF808	0.274467	0.533	0.237	1.4e-152	Early Primitive Streak	ZNF808
OAT	0.305403	0.588	0.28	1.7e-152	Early Primitive Streak	OAT
FNBP1L	0.401253	0.907	0.578	3.64e-152	Early Primitive Streak	FNBP1L
AP2S1	0.422411	0.989	0.845	4.28e-152	Early Primitive Streak	AP2S1
DNAJC8	0.408498	0.993	0.863	1.76e-151	Early Primitive Streak	DNAJC8
HNRNPK	0.381899	0.999	0.963	1.25e-150	Early Primitive Streak	HNRNPK
AGO1	0.357033	0.703	0.376	3.65e-150	Early Primitive Streak	AGO1
OLFML3	0.315893	0.562	0.256	3.81e-150	Early Primitive Streak	OLFML3
XRCC6	0.416564	0.99	0.855	1.85e-149	Early Primitive Streak	XRCC6
ITGB3BP	0.301731	0.798	0.435	1.12e-148	Early Primitive Streak	ITGB3BP
UBA2	0.418704	0.947	0.679	2.68e-148	Early Primitive Streak	UBA2
RPA3	0.391584	0.884	0.562	1.94e-147	Early Primitive Streak	RPA3
UGP2	0.442682	0.986	0.769	5.35e-147	Early Primitive Streak	UGP2
GET3	0.347113	0.778	0.452	8.21e-147	Early Primitive Streak	GET3
TIPIN	0.268681	0.527	0.24	1.16e-146	Early Primitive Streak	TIPIN
EXOSC9	0.332316	0.695	0.372	1.9e-146	Early Primitive Streak	EXOSC9
CTBP2	0.398835	0.874	0.568	3.96e-146	Early Primitive Streak	CTBP2
NTHL1	0.344879	0.78	0.443	8.98e-146	Early Primitive Streak	NTHL1
WARS	0.318645	0.625	0.322	1.16e-145	Early Primitive Streak	WARS
ZC3H15	0.40276	0.986	0.818	3.26e-145	Early Primitive Streak	ZC3H15
CENPN	0.270612	0.597	0.285	8.53e-145	Early Primitive Streak	CENPN
LSM3	0.424041	0.959	0.709	1.06e-144	Early Primitive Streak	LSM3
CCT2	0.394695	0.994	0.907	8.28e-144	Early Primitive Streak	CCT2
HIST1H1D	0.763494	0.828	0.516	1.17e-143	Early Primitive Streak	HIST1H1D
ODC1	0.675082	0.898	0.682	3.37e-143	Early Primitive Streak	ODC1
NUDT5	0.401523	0.931	0.639	3.78e-143	Early Primitive Streak	NUDT5
EPRS	0.428232	0.958	0.76	6.17e-143	Early Primitive Streak	EPRS
PSMB2	0.413721	0.944	0.703	1.02e-142	Early Primitive Streak	PSMB2
PWP1	0.353523	0.829	0.502	1.56e-142	Early Primitive Streak	PWP1
RRS1	0.27534	0.518	0.237	2.39e-142	Early Primitive Streak	RRS1
GLO1	0.428177	0.963	0.764	3.67e-142	Early Primitive Streak	GLO1
NDUFB9	0.391872	0.99	0.859	6.16e-142	Early Primitive Streak	NDUFB9
ARHGEF10	0.321339	0.683	0.363	7.02e-142	Early Primitive Streak	ARHGEF10
PGD	0.382008	0.884	0.582	2.17e-141	Early Primitive Streak	PGD
LINC00665	0.340352	0.908	0.583	2.22e-141	Early Primitive Streak	LINC00665
SREK1IP1	0.365294	0.899	0.596	2.99e-141	Early Primitive Streak	SREK1IP1
AGPAT5	0.351693	0.79	0.466	3.03e-141	Early Primitive Streak	AGPAT5
DTYMK	0.343692	0.851	0.507	3.25e-141	Early Primitive Streak	DTYMK
LAS1L	0.305981	0.674	0.353	4.52e-141	Early Primitive Streak	LAS1L
PCNA	0.300088	0.692	0.351	7.71e-141	Early Primitive Streak	PCNA
HIST1H1B	0.408872	0.684	0.346	1.33e-140	Early Primitive Streak	HIST1H1B
RPL24	0.260286	1	0.996	1.42e-140	Early Primitive Streak	RPL24
PHF5A	0.263839	0.597	0.29	1.69e-140	Early Primitive Streak	PHF5A
PTPN2	0.324609	0.777	0.449	2.8e-140	Early Primitive Streak	PTPN2
PARK7	0.377996	0.998	0.937	9.27e-140	Early Primitive Streak	PARK7
ABCE1	0.388678	0.858	0.545	9.67e-140	Early Primitive Streak	ABCE1
GRAMD1A	0.29365	0.653	0.336	9.97e-139	Early Primitive Streak	GRAMD1A
PNN	0.43735	0.989	0.87	1.09e-138	Early Primitive Streak	PNN
SNHG17	0.330948	0.678	0.366	1.35e-138	Early Primitive Streak	SNHG17
VDAC1	0.383898	0.996	0.914	1.45e-138	Early Primitive Streak	VDAC1
PSMD1	0.414928	0.949	0.672	1.81e-138	Early Primitive Streak	PSMD1
TCHP	0.277057	0.559	0.266	3.86e-138	Early Primitive Streak	TCHP
POP7	0.353526	0.779	0.449	4.36e-138	Early Primitive Streak	POP7
ACSL4	0.321305	0.615	0.319	4.98e-138	Early Primitive Streak	ACSL4
TXLNG	0.303274	0.595	0.301	5.38e-138	Early Primitive Streak	TXLNG
TIMM10	0.385924	0.778	0.471	1.89e-137	Early Primitive Streak	TIMM10
CHCHD4	0.256398	0.497	0.224	2.32e-137	Early Primitive Streak	CHCHD4
RPS27A	0.287842	1	0.997	2.97e-137	Early Primitive Streak	RPS27A
FAM133B	0.384743	0.95	0.714	4.83e-137	Early Primitive Streak	FAM133B
RAC1	0.382875	0.997	0.93	5.46e-137	Early Primitive Streak	RAC1
UBE2S	0.378051	0.944	0.658	9.35e-137	Early Primitive Streak	UBE2S
WDR12	0.329157	0.739	0.419	1.62e-136	Early Primitive Streak	WDR12
EXOSC7	0.355688	0.839	0.513	2.52e-136	Early Primitive Streak	EXOSC7
SNRPD2	0.371637	0.998	0.936	2.62e-136	Early Primitive Streak	SNRPD2
DFFA	0.387608	0.881	0.58	1.02e-134	Early Primitive Streak	DFFA
RCC2	0.324901	0.756	0.424	3.18e-134	Early Primitive Streak	RCC2
SEM1	0.388557	0.989	0.828	5.81e-134	Early Primitive Streak	SEM1
EBNA1BP2	0.341428	0.791	0.454	1.55e-133	Early Primitive Streak	EBNA1BP2
AC011447.3	0.259213	0.639	0.313	3.57e-133	Early Primitive Streak	AC011447.3
PTRH2	0.286549	0.589	0.296	3.66e-133	Early Primitive Streak	PTRH2
ATP1B3	0.388965	0.949	0.668	5.47e-133	Early Primitive Streak	ATP1B3
AHCY	0.399069	0.939	0.69	8.46e-133	Early Primitive Streak	AHCY
YWHAE	0.30293	1	0.99	1.11e-132	Early Primitive Streak	YWHAE
WDR3	0.285394	0.587	0.294	1.18e-132	Early Primitive Streak	WDR3
PPAN	0.253561	0.589	0.292	1.19e-132	Early Primitive Streak	PPAN
POLD3	0.322656	0.693	0.379	3.99e-132	Early Primitive Streak	POLD3
RPS6	0.324574	1	0.997	1.6e-131	Early Primitive Streak	RPS6
AGTRAP	0.325267	0.777	0.455	1.02e-130	Early Primitive Streak	AGTRAP
RALA	0.363999	0.895	0.622	1.43e-130	Early Primitive Streak	RALA
FAM207A	0.335537	0.826	0.515	1.49e-130	Early Primitive Streak	FAM207A
DDX54	0.322514	0.718	0.414	1.67e-130	Early Primitive Streak	DDX54
PDHB	0.41023	0.903	0.652	1.72e-130	Early Primitive Streak	PDHB
PPID	0.391887	0.862	0.568	1.87e-130	Early Primitive Streak	PPID
RBM17	0.396941	0.955	0.761	2.53e-130	Early Primitive Streak	RBM17
NOM1	0.293673	0.619	0.325	7.91e-130	Early Primitive Streak	NOM1
LAP3	0.330155	0.753	0.439	1.61e-129	Early Primitive Streak	LAP3
CACYBP	0.39177	0.964	0.726	3.63e-129	Early Primitive Streak	CACYBP
RPL3	0.27968	1	0.998	8.29e-129	Early Primitive Streak	RPL3
PRPS1	0.252597	0.543	0.262	9.21e-129	Early Primitive Streak	PRPS1
CKS1B	0.331007	0.94	0.597	1.01e-128	Early Primitive Streak	CKS1B
RUVBL2	0.336916	0.79	0.482	2.53e-128	Early Primitive Streak	RUVBL2
TUBA1B	0.372262	0.999	0.92	2.83e-128	Early Primitive Streak	TUBA1B
SRRM1	0.344338	0.996	0.928	5.62e-128	Early Primitive Streak	SRRM1
GARS	0.374871	0.903	0.625	6.72e-128	Early Primitive Streak	GARS
IQGAP1	0.338457	0.824	0.487	1.1e-127	Early Primitive Streak	IQGAP1
MAP3K4	0.321816	0.745	0.435	2.13e-127	Early Primitive Streak	MAP3K4
SAV1	0.282994	0.695	0.384	2.2e-127	Early Primitive Streak	SAV1
HEATR1	0.284275	0.634	0.334	2.66e-127	Early Primitive Streak	HEATR1
NAE1	0.367956	0.878	0.585	3.47e-127	Early Primitive Streak	NAE1
RRM1	0.297016	0.791	0.445	4.88e-127	Early Primitive Streak	RRM1
HSPA4	0.400778	0.964	0.757	9.06e-127	Early Primitive Streak	HSPA4
PNPT1	0.316266	0.719	0.41	2.52e-126	Early Primitive Streak	PNPT1
ACTL6A	0.287656	0.703	0.382	2.85e-126	Early Primitive Streak	ACTL6A
THRAP3	0.3901	0.987	0.85	3.78e-126	Early Primitive Streak	THRAP3
SNHG16	0.384234	0.986	0.841	4.05e-126	Early Primitive Streak	SNHG16
TAF1D	0.365276	0.97	0.768	6.63e-126	Early Primitive Streak	TAF1D
C8orf33	0.351632	0.9	0.629	8.43e-126	Early Primitive Streak	C8orf33
IMP3	0.353712	0.828	0.522	9.84e-126	Early Primitive Streak	IMP3
MPP6	0.301182	0.665	0.366	3.58e-125	Early Primitive Streak	MPP6
MT-CO2	0.425823	0.999	0.989	5.22e-125	Early Primitive Streak	MT-CO2
FKBP11	0.250941	0.534	0.256	7.77e-125	Early Primitive Streak	FKBP11
MDH2	0.37105	0.984	0.825	8.57e-125	Early Primitive Streak	MDH2
GDI2	0.360665	0.978	0.855	8.65e-125	Early Primitive Streak	GDI2
PAM16	0.35888	0.867	0.574	9.3e-125	Early Primitive Streak	PAM16
FKBP1B	0.297294	0.686	0.377	1.13e-124	Early Primitive Streak	FKBP1B
ZNF121	0.261328	0.648	0.34	1.57e-124	Early Primitive Streak	ZNF121
AKR1A1	0.351197	0.938	0.694	3.28e-124	Early Primitive Streak	AKR1A1
MRPL12	0.382882	0.94	0.673	5.6e-124	Early Primitive Streak	MRPL12
KXD1	0.324987	0.773	0.47	8.67e-124	Early Primitive Streak	KXD1
NOP14	0.317872	0.766	0.457	1.02e-123	Early Primitive Streak	NOP14
CBX3	0.344075	0.996	0.928	1.29e-123	Early Primitive Streak	CBX3
MTREX	0.323972	0.783	0.485	1.86e-123	Early Primitive Streak	MTREX
MTHFD1L	0.316177	0.714	0.416	2.84e-123	Early Primitive Streak	MTHFD1L
PSMB3	0.384188	0.978	0.77	2.93e-122	Early Primitive Streak	PSMB3
MTG1	0.294437	0.777	0.463	3.73e-122	Early Primitive Streak	MTG1
COMMD4	0.329866	0.795	0.481	4.96e-122	Early Primitive Streak	COMMD4
CARM1	0.286704	0.681	0.376	7.93e-122	Early Primitive Streak	CARM1
SLC4A7	0.333398	0.765	0.451	8.69e-122	Early Primitive Streak	SLC4A7
UCHL3	0.308064	0.719	0.41	1.01e-121	Early Primitive Streak	UCHL3
EIF3D	0.359405	0.957	0.757	2.86e-121	Early Primitive Streak	EIF3D
CEBPZOS	0.375915	0.795	0.49	3.15e-121	Early Primitive Streak	CEBPZOS
PSMA7	0.364101	0.999	0.946	5.1e-121	Early Primitive Streak	PSMA7
IMP4	0.292455	0.74	0.433	5.43e-121	Early Primitive Streak	IMP4
SF3B2	0.365882	0.984	0.839	5.78e-121	Early Primitive Streak	SF3B2
LSM12	0.351586	0.849	0.562	1.61e-120	Early Primitive Streak	LSM12
BMS1	0.361566	0.844	0.547	2.27e-120	Early Primitive Streak	BMS1
CCDC137	0.325063	0.725	0.425	7.32e-120	Early Primitive Streak	CCDC137
DPYSL2	0.361516	0.918	0.623	1.13e-119	Early Primitive Streak	DPYSL2
IFRD2	0.254171	0.571	0.296	3.92e-119	Early Primitive Streak	IFRD2
CAP1	0.366019	0.939	0.679	4.69e-119	Early Primitive Streak	CAP1
BTF3	0.283281	0.999	0.984	4.97e-119	Early Primitive Streak	BTF3
LSM6	0.317007	0.746	0.439	6.77e-119	Early Primitive Streak	LSM6
TMA7	0.357105	0.998	0.952	1.26e-118	Early Primitive Streak	TMA7
PSMD7	0.382707	0.978	0.791	1.94e-118	Early Primitive Streak	PSMD7
SRSF2	0.375815	0.951	0.707	2.59e-118	Early Primitive Streak	SRSF2
LTA4H	0.317007	0.837	0.532	3.18e-118	Early Primitive Streak	LTA4H
CENPX	0.3718	0.859	0.569	3.54e-118	Early Primitive Streak	CENPX
SLC25A5	0.332227	0.995	0.906	8.41e-118	Early Primitive Streak	SLC25A5
NOA1	0.266008	0.609	0.321	1.44e-117	Early Primitive Streak	NOA1
GCHFR	0.297851	0.719	0.409	1.92e-117	Early Primitive Streak	GCHFR
RRP1	0.253793	0.579	0.303	3.92e-117	Early Primitive Streak	RRP1
SFPQ	0.43951	0.975	0.825	1.08e-116	Early Primitive Streak	SFPQ
TTF1	0.300496	0.705	0.415	1.83e-116	Early Primitive Streak	TTF1
ATP5MF	0.345711	0.999	0.936	2.35e-116	Early Primitive Streak	ATP5MF
POLR2I	0.363244	0.97	0.787	4.06e-116	Early Primitive Streak	POLR2I
SNRPE	0.360491	0.996	0.876	4.29e-116	Early Primitive Streak	SNRPE
PPP1R3B	0.271012	0.657	0.352	3.2e-115	Early Primitive Streak	PPP1R3B
MIS18BP1	0.279263	0.84	0.507	3.41e-115	Early Primitive Streak	MIS18BP1
CHML	0.256805	0.567	0.293	5.71e-115	Early Primitive Streak	CHML
DDX1	0.35746	0.964	0.775	7.65e-115	Early Primitive Streak	DDX1
SNHG1	0.315498	0.821	0.525	2.52e-114	Early Primitive Streak	SNHG1
TCF7L1	0.292343	0.738	0.419	4.78e-114	Early Primitive Streak	TCF7L1
NANS	0.31606	0.763	0.468	7.93e-114	Early Primitive Streak	NANS
RRAS2	0.289171	0.732	0.423	1.16e-113	Early Primitive Streak	RRAS2
MTCH2	0.349306	0.876	0.595	1.44e-113	Early Primitive Streak	MTCH2
ADSS	0.324887	0.823	0.518	2.21e-113	Early Primitive Streak	ADSS
HES1	0.324662	0.731	0.425	2.93e-113	Early Primitive Streak	HES1
TTF2	0.279328	0.62	0.335	9.17e-113	Early Primitive Streak	TTF2
SRSF9	0.36315	0.975	0.759	3.3e-112	Early Primitive Streak	SRSF9
CBX1	0.346875	0.984	0.843	3.79e-112	Early Primitive Streak	CBX1
NUP107	0.25555	0.651	0.357	2.13e-111	Early Primitive Streak	NUP107
MTX1	0.282214	0.772	0.457	5.39e-111	Early Primitive Streak	MTX1
ORC2	0.262983	0.595	0.32	1.51e-110	Early Primitive Streak	ORC2
CDC37	0.353649	0.939	0.722	3.13e-110	Early Primitive Streak	CDC37
CHCHD1	0.344831	0.895	0.622	3.98e-110	Early Primitive Streak	CHCHD1
PCLAF	0.276496	0.777	0.432	8.63e-110	Early Primitive Streak	PCLAF
UQCRH	0.283977	0.999	0.981	1.39e-109	Early Primitive Streak	UQCRH
DHX15	0.340174	0.857	0.583	1.7e-109	Early Primitive Streak	DHX15
PRPF40A	0.352539	0.98	0.831	3.26e-109	Early Primitive Streak	PRPF40A
CCDC47	0.354201	0.89	0.634	3.34e-109	Early Primitive Streak	CCDC47
SMARCC1	0.344049	0.989	0.883	9.2e-109	Early Primitive Streak	SMARCC1
PDIA3	0.334425	0.996	0.916	1.13e-108	Early Primitive Streak	PDIA3
CNDP2	0.274597	0.652	0.369	1.33e-108	Early Primitive Streak	CNDP2
SARS	0.313771	0.949	0.726	2.07e-108	Early Primitive Streak	SARS
C12orf45	0.313063	0.79	0.489	2.98e-108	Early Primitive Streak	C12orf45
UBE2I	0.334448	0.984	0.824	4.72e-108	Early Primitive Streak	UBE2I
HDGF	0.341735	0.971	0.779	1.27e-107	Early Primitive Streak	HDGF
ADRM1	0.325577	0.818	0.531	1.52e-107	Early Primitive Streak	ADRM1
PSMD11	0.321106	0.844	0.538	1.8e-107	Early Primitive Streak	PSMD11
TMOD3	0.316895	0.836	0.533	1.86e-107	Early Primitive Streak	TMOD3
NQO2	0.472267	0.819	0.552	2.07e-107	Early Primitive Streak	NQO2
NAA15	0.305183	0.734	0.442	3.39e-107	Early Primitive Streak	NAA15
EI24	0.332898	0.868	0.589	6.32e-107	Early Primitive Streak	EI24
DIPK2A	0.307252	0.657	0.371	7.34e-107	Early Primitive Streak	DIPK2A
SNRPA1	0.337362	0.896	0.623	1.01e-106	Early Primitive Streak	SNRPA1
CCDC124	0.328707	0.88	0.604	6.26e-106	Early Primitive Streak	CCDC124
RACK1	0.25749	1	0.996	9.32e-106	Early Primitive Streak	RACK1
EXOSC8	0.302525	0.852	0.554	1.31e-105	Early Primitive Streak	EXOSC8
PPP1CC	0.335817	0.977	0.815	3.49e-105	Early Primitive Streak	PPP1CC
TTC19	0.309356	0.791	0.51	4.41e-105	Early Primitive Streak	TTC19
NUP54	0.25833	0.642	0.362	8.33e-105	Early Primitive Streak	NUP54
RSL24D1	0.328941	0.973	0.824	1.22e-104	Early Primitive Streak	RSL24D1
MRPS12	0.324906	0.857	0.576	1.56e-104	Early Primitive Streak	MRPS12
IPO5	0.361848	0.946	0.731	1.69e-104	Early Primitive Streak	IPO5
NOC2L	0.266491	0.75	0.452	1.7e-104	Early Primitive Streak	NOC2L
G3BP1	0.337178	0.951	0.736	1.52e-103	Early Primitive Streak	G3BP1
GOT2	0.341015	0.878	0.59	1.55e-103	Early Primitive Streak	GOT2
H3F3A	0.258595	1	0.993	1.68e-103	Early Primitive Streak	H3F3A
PSMA4	0.340234	0.978	0.809	3.86e-103	Early Primitive Streak	PSMA4
SMARCD1	0.288633	0.849	0.55	5.78e-103	Early Primitive Streak	SMARCD1
TGS1	0.267861	0.669	0.387	6.37e-103	Early Primitive Streak	TGS1
LEO1	0.29953	0.734	0.445	6.48e-103	Early Primitive Streak	LEO1
RPP30	0.261881	0.744	0.444	8.65e-103	Early Primitive Streak	RPP30
DNAJC2	0.311163	0.834	0.552	1.72e-102	Early Primitive Streak	DNAJC2
PPFIA1	0.326924	0.801	0.531	1.75e-102	Early Primitive Streak	PPFIA1
IPO7	0.352258	0.934	0.706	2.22e-102	Early Primitive Streak	IPO7
SMC1A	0.352167	0.921	0.678	7.1e-102	Early Primitive Streak	SMC1A
USP7	0.320983	0.88	0.608	9.36e-102	Early Primitive Streak	USP7
TAF15	0.394551	0.915	0.697	2.43e-101	Early Primitive Streak	TAF15
TRAP1	0.289285	0.827	0.547	6.45e-101	Early Primitive Streak	TRAP1
YWHAH	0.324819	0.954	0.705	7.38e-101	Early Primitive Streak	YWHAH
YBX3	0.335006	0.974	0.775	1.53e-100	Early Primitive Streak	YBX3
PYCR1	0.280972	0.694	0.415	1.54e-100	Early Primitive Streak	PYCR1
TCEA1	0.293446	0.992	0.899	2.42e-100	Early Primitive Streak	TCEA1
ISOC2	0.30719	0.833	0.539	2.5e-100	Early Primitive Streak	ISOC2
FSCN1	0.330091	0.973	0.777	5.6e-100	Early Primitive Streak	FSCN1
TOMM22	0.343151	0.892	0.652	5.97e-100	Early Primitive Streak	TOMM22
MSH6	0.341273	0.924	0.671	1.2e-99	Early Primitive Streak	MSH6
UPF3B	0.301707	0.813	0.53	1.41e-99	Early Primitive Streak	UPF3B
SURF2	0.267677	0.704	0.427	1.42e-99	Early Primitive Streak	SURF2
GPN3	0.278104	0.762	0.472	1.68e-99	Early Primitive Streak	GPN3
MT-ND2	0.250322	1	0.988	2.83e-99	Early Primitive Streak	MT-ND2
PSMB1	0.328739	0.995	0.9	4.71e-99	Early Primitive Streak	PSMB1
NDUFB7	0.337773	0.984	0.851	6.66e-99	Early Primitive Streak	NDUFB7
SLC25A6	0.269723	0.998	0.984	2.11e-98	Early Primitive Streak	SLC25A6
ORC3	0.254992	0.675	0.402	4.27e-98	Early Primitive Streak	ORC3
MRPL32	0.288763	0.77	0.489	6.47e-98	Early Primitive Streak	MRPL32
FKBP4	0.317096	0.905	0.638	6.77e-98	Early Primitive Streak	FKBP4
SMC6	0.285237	0.747	0.459	7.11e-98	Early Primitive Streak	SMC6
CCT7	0.339761	0.969	0.78	7.7e-98	Early Primitive Streak	CCT7
MT-CYB	0.369113	1	0.985	9.62e-98	Early Primitive Streak	MT-CYB
CD320	0.287941	0.785	0.491	2.18e-97	Early Primitive Streak	CD320
BUD23	0.287097	0.78	0.489	2.29e-97	Early Primitive Streak	BUD23
EIF4E	0.299535	0.787	0.514	2.52e-97	Early Primitive Streak	EIF4E
DNAJC7	0.332935	0.933	0.723	3.08e-97	Early Primitive Streak	DNAJC7
NDUFS5	0.28258	0.999	0.978	4.75e-97	Early Primitive Streak	NDUFS5
NAA10	0.313656	0.872	0.6	4.93e-97	Early Primitive Streak	NAA10
MRPL58	0.269453	0.688	0.417	1.13e-96	Early Primitive Streak	MRPL58
NUDC	0.348112	0.982	0.83	1.92e-96	Early Primitive Streak	NUDC
G2E3	0.275768	0.688	0.401	2.53e-96	Early Primitive Streak	G2E3
HNRNPF	0.330845	0.948	0.717	2.84e-96	Early Primitive Streak	HNRNPF
PIH1D1	0.285824	0.824	0.538	3.75e-96	Early Primitive Streak	PIH1D1
GTPBP4	0.313385	0.872	0.599	3.76e-96	Early Primitive Streak	GTPBP4
TMEM126B	0.270945	0.738	0.454	4.42e-96	Early Primitive Streak	TMEM126B
TLK1	0.298172	0.806	0.529	4.59e-96	Early Primitive Streak	TLK1
TXNL4A	0.334309	0.934	0.715	1.18e-95	Early Primitive Streak	TXNL4A
RPS26	0.362859	0.999	0.989	1.34e-95	Early Primitive Streak	RPS26
JPT1	0.316219	0.973	0.747	1.93e-95	Early Primitive Streak	JPT1
UBE2K	0.339987	0.934	0.728	2.56e-95	Early Primitive Streak	UBE2K
BRD9	0.265766	0.755	0.476	3.65e-95	Early Primitive Streak	BRD9
UBN2	0.26858	0.714	0.44	8.64e-95	Early Primitive Streak	UBN2
AMD1	0.315197	0.846	0.571	1.08e-94	Early Primitive Streak	AMD1
CHMP2B	0.266128	0.78	0.5	1.55e-94	Early Primitive Streak	CHMP2B
PSMC3	0.320202	0.956	0.759	3.44e-94	Early Primitive Streak	PSMC3
UNG	0.251531	0.574	0.314	7.01e-94	Early Primitive Streak	UNG
PTBP1	0.286593	0.874	0.596	1.07e-93	Early Primitive Streak	PTBP1
SMC2	0.273788	0.849	0.549	1.12e-93	Early Primitive Streak	SMC2
MRPL4	0.286717	0.789	0.512	1.56e-93	Early Primitive Streak	MRPL4
BRD7	0.297666	0.959	0.769	2.11e-93	Early Primitive Streak	BRD7
PRMT1	0.303998	0.998	0.902	2.33e-93	Early Primitive Streak	PRMT1
TATDN1	0.266545	0.775	0.503	2.37e-93	Early Primitive Streak	TATDN1
GNB4	0.251946	0.695	0.413	1.52e-92	Early Primitive Streak	GNB4
RPL39L	0.253447	0.691	0.413	1.66e-92	Early Primitive Streak	RPL39L
TMEM258	0.300155	0.996	0.925	2.2e-92	Early Primitive Streak	TMEM258
LSM5	0.308779	0.935	0.705	2.33e-92	Early Primitive Streak	LSM5
UBA1	0.284208	0.799	0.522	2.57e-92	Early Primitive Streak	UBA1
SNHG7	0.280286	0.986	0.857	5.96e-92	Early Primitive Streak	SNHG7
GMNN	0.294153	0.818	0.52	1.27e-91	Early Primitive Streak	GMNN
PAK1	0.258705	0.762	0.468	2.92e-91	Early Primitive Streak	PAK1
CNOT7	0.29808	0.892	0.643	4.23e-91	Early Primitive Streak	CNOT7
MRPS21	0.319833	0.986	0.866	1.29e-90	Early Primitive Streak	MRPS21
GADD45GIP1	0.320754	0.987	0.862	2.43e-90	Early Primitive Streak	GADD45GIP1
EIF3G	0.300665	0.98	0.833	6.9e-90	Early Primitive Streak	EIF3G
GMPS	0.3027	0.911	0.659	1.27e-89	Early Primitive Streak	GMPS
SYNCRIP	0.318607	0.959	0.751	1.43e-89	Early Primitive Streak	SYNCRIP
ACTB	0.284888	1	0.941	2.34e-89	Early Primitive Streak	ACTB
CWC27	0.286749	0.856	0.593	1.58e-88	Early Primitive Streak	CWC27
CPSF2	0.267766	0.757	0.48	5.48e-88	Early Primitive Streak	CPSF2
ARFGEF1	0.274982	0.762	0.489	6.98e-88	Early Primitive Streak	ARFGEF1
MRPL38	0.26774	0.767	0.494	2.31e-87	Early Primitive Streak	MRPL38
EIF2S1	0.2732	0.801	0.52	3.14e-87	Early Primitive Streak	EIF2S1
SNX5	0.27641	0.884	0.621	1.15e-86	Early Primitive Streak	SNX5
BANF1	0.310476	0.976	0.806	4.05e-86	Early Primitive Streak	BANF1
PTBP3	0.259169	0.745	0.467	5.94e-86	Early Primitive Streak	PTBP3
CENPV	0.264003	0.913	0.626	7.07e-86	Early Primitive Streak	CENPV
KHDRBS1	0.296436	0.993	0.897	7.76e-86	Early Primitive Streak	KHDRBS1
SNHG6	0.267728	0.996	0.932	8.66e-86	Early Primitive Streak	SNHG6
NAP1L4	0.308568	0.978	0.831	3.89e-85	Early Primitive Streak	NAP1L4
HNRNPU	0.320791	0.998	0.971	5.02e-85	Early Primitive Streak	HNRNPU
GLRX3	0.291915	0.874	0.62	1.07e-84	Early Primitive Streak	GLRX3
TFAM	0.30127	0.912	0.672	1.21e-84	Early Primitive Streak	TFAM
HNRNPL	0.273575	0.858	0.584	1.31e-84	Early Primitive Streak	HNRNPL
CYC1	0.292664	0.942	0.721	1.73e-84	Early Primitive Streak	CYC1
LSM2	0.28032	0.937	0.708	3.39e-84	Early Primitive Streak	LSM2
EIF4A3	0.259897	0.769	0.498	3.68e-84	Early Primitive Streak	EIF4A3
SUCLA2	0.312542	0.801	0.551	4.81e-84	Early Primitive Streak	SUCLA2
TRAPPC2L	0.272401	0.904	0.651	2.7e-83	Early Primitive Streak	TRAPPC2L
RPL22L1	0.292666	0.898	0.638	3.56e-83	Early Primitive Streak	RPL22L1
RRP15	0.258946	0.793	0.517	5.41e-83	Early Primitive Streak	RRP15
PSMC5	0.298489	0.944	0.716	7.02e-83	Early Primitive Streak	PSMC5
BCAP31	0.285389	0.878	0.639	1.77e-82	Early Primitive Streak	BCAP31
RBM28	0.250235	0.768	0.497	2.28e-82	Early Primitive Streak	RBM28
GATAD2A	0.252179	0.721	0.462	4.73e-82	Early Primitive Streak	GATAD2A
MRPS16	0.277919	0.88	0.613	7.96e-82	Early Primitive Streak	MRPS16
EIF6	0.286588	0.91	0.675	2.67e-81	Early Primitive Streak	EIF6
PTPN12	0.270246	0.821	0.56	3.46e-81	Early Primitive Streak	PTPN12
TDG	0.264973	0.846	0.581	1.09e-80	Early Primitive Streak	TDG
PRPF4B	0.277729	0.975	0.802	1.16e-80	Early Primitive Streak	PRPF4B
ERH	0.295032	0.986	0.838	2.46e-80	Early Primitive Streak	ERH
CARHSP1	0.261699	0.947	0.728	2.86e-80	Early Primitive Streak	CARHSP1
UBE2N	0.263167	0.806	0.528	3.02e-80	Early Primitive Streak	UBE2N
RIF1	0.296458	0.914	0.675	3.06e-79	Early Primitive Streak	RIF1
CDK4	0.270871	0.89	0.64	8.29e-79	Early Primitive Streak	CDK4
UBE2G2	0.269698	0.778	0.528	9.84e-79	Early Primitive Streak	UBE2G2
HNRNPA0	0.288851	0.96	0.777	2.49e-78	Early Primitive Streak	HNRNPA0
PDCD10	0.264087	0.818	0.568	1.52e-77	Early Primitive Streak	PDCD10
SRP9	0.290555	0.964	0.793	1.1e-76	Early Primitive Streak	SRP9
MARCKSL1	0.260926	0.994	0.868	1.17e-76	Early Primitive Streak	MARCKSL1
SMARCA5	0.297559	0.987	0.891	1.88e-76	Early Primitive Streak	SMARCA5
PRRC2C	0.278778	0.996	0.949	5e-76	Early Primitive Streak	PRRC2C
LARP7	0.305359	0.919	0.72	6.76e-76	Early Primitive Streak	LARP7
MRPS15	0.281628	0.918	0.673	1.13e-75	Early Primitive Streak	MRPS15
ILF2	0.287838	0.963	0.77	1.45e-75	Early Primitive Streak	ILF2
HNRNPDL	0.266312	0.998	0.945	2.12e-75	Early Primitive Streak	HNRNPDL
SSNA1	0.26378	0.816	0.548	3.9e-75	Early Primitive Streak	SSNA1
ARPC4	0.255006	0.802	0.545	1.93e-74	Early Primitive Streak	ARPC4
MPG	0.258012	0.82	0.564	4.52e-74	Early Primitive Streak	MPG
PSMA1	0.269099	0.964	0.809	7.5e-74	Early Primitive Streak	PSMA1
METTL5	0.255974	0.836	0.579	2.2e-73	Early Primitive Streak	METTL5
PRR13	0.260822	0.881	0.633	2.34e-73	Early Primitive Streak	PRR13
AKIRIN1	0.271281	0.942	0.736	1.15e-72	Early Primitive Streak	AKIRIN1
COX16	0.263511	0.88	0.638	1.69e-72	Early Primitive Streak	COX16
USP14	0.283433	0.948	0.751	2.62e-71	Early Primitive Streak	USP14
ADH5	0.284631	0.967	0.809	2.84e-71	Early Primitive Streak	ADH5
LAMTOR4	0.273723	0.966	0.764	3.05e-71	Early Primitive Streak	LAMTOR4
PSMD12	0.255113	0.891	0.64	1.3e-69	Early Primitive Streak	PSMD12
POLR2E	0.264936	0.916	0.694	2.96e-69	Early Primitive Streak	POLR2E
DNTTIP2	0.250448	0.813	0.563	2.02e-68	Early Primitive Streak	DNTTIP2
CLTA	0.25023	0.996	0.913	7.62e-68	Early Primitive Streak	CLTA
GRB2	0.250546	0.837	0.591	1.37e-67	Early Primitive Streak	GRB2
NDUFAB1	0.268759	0.98	0.831	4.51e-67	Early Primitive Streak	NDUFAB1
EIF2S3	0.253147	0.952	0.769	1.39e-66	Early Primitive Streak	EIF2S3
RBM25	0.259406	0.984	0.868	1.84e-66	Early Primitive Streak	RBM25
USP48	0.250249	0.83	0.577	3.01e-66	Early Primitive Streak	USP48
STIP1	0.256695	0.913	0.665	3.07e-66	Early Primitive Streak	STIP1
MRPL20	0.276209	0.98	0.827	4.06e-66	Early Primitive Streak	MRPL20
PSMB6	0.263569	0.989	0.881	5.05e-66	Early Primitive Streak	PSMB6
FAM136A	0.26649	0.914	0.676	8.15e-66	Early Primitive Streak	FAM136A
CHURC1	0.267799	0.93	0.75	8.3e-65	Early Primitive Streak	CHURC1
TRMT112	0.25358	0.962	0.785	4.45e-64	Early Primitive Streak	TRMT112
NDUFB4	0.254565	0.985	0.868	2.07e-63	Early Primitive Streak	NDUFB4
SNRNP200	0.267464	0.921	0.711	3.22e-63	Early Primitive Streak	SNRNP200
UBE2D2	0.260635	0.965	0.8	7.32e-63	Early Primitive Streak	UBE2D2
PSMA5	0.253371	0.876	0.632	8.11e-63	Early Primitive Streak	PSMA5
MLEC	0.25636	0.961	0.807	2.94e-62	Early Primitive Streak	MLEC
MRPL47	0.262495	0.877	0.648	5.2e-62	Early Primitive Streak	MRPL47
SNRPB2	0.255491	0.956	0.78	1.79e-61	Early Primitive Streak	SNRPB2
PFDN2	0.250703	0.908	0.693	4.04e-61	Early Primitive Streak	PFDN2
DYNC1LI1	0.250733	0.898	0.676	4.62e-61	Early Primitive Streak	DYNC1LI1
SUMO1	0.251608	0.936	0.743	4.57e-58	Early Primitive Streak	SUMO1
PSMD2	0.260887	0.93	0.727	8.33e-57	Early Primitive Streak	PSMD2
SNHG14	0.250909	0.999	0.935	1.17e-56	Early Primitive Streak	SNHG14
HNRNPH3	0.258387	0.97	0.814	1.88e-56	Early Primitive Streak	HNRNPH3
HIST1H1E	0.332676	0.713	0.51	1.17e-55	Early Primitive Streak	HIST1H1E
ACTG1	0.278329	1	0.929	8.99e-53	Early Primitive Streak	ACTG1
MT-ND6	0.260108	0.954	0.831	1.21e-50	Early Primitive Streak	MT-ND6
IGF2	2.34869	0.93	0.338	0	Epicardial Progenitors	IGF2
COL3A1	2.01136	0.926	0.209	0	Epicardial Progenitors	COL3A1
TMEM88	1.97227	0.911	0.473	0	Epicardial Progenitors	TMEM88
LUM	1.9414	0.596	0.04	0	Epicardial Progenitors	LUM
IGFBP3	1.86778	0.635	0.199	0	Epicardial Progenitors	IGFBP3
HAND1	1.7896	0.802	0.322	0	Epicardial Progenitors	HAND1
VIM	1.74787	1	0.802	0	Epicardial Progenitors	VIM
S100A10	1.736	0.989	0.757	0	Epicardial Progenitors	S100A10
KRT18	1.69849	0.997	0.953	0	Epicardial Progenitors	KRT18
COL1A1	1.68416	0.976	0.497	0	Epicardial Progenitors	COL1A1
COL1A2	1.4976	0.878	0.377	0	Epicardial Progenitors	COL1A2
SPARC	1.49056	0.941	0.648	0	Epicardial Progenitors	SPARC
SLC9A3R1	1.46475	0.852	0.488	0	Epicardial Progenitors	SLC9A3R1
KRT8	1.45576	0.999	0.948	0	Epicardial Progenitors	KRT8
BST2	1.3993	0.698	0.349	0	Epicardial Progenitors	BST2
PHGDH1	1.37754	0.927	0.714	0	Epicardial Progenitors	PHGDH
CALD1	1.30351	0.983	0.876	0	Epicardial Progenitors	CALD1
MEST	1.30106	0.823	0.401	0	Epicardial Progenitors	MEST
IGDCC3	1.2303	0.811	0.461	0	Epicardial Progenitors	IGDCC3
AKAP12	1.15749	0.956	0.785	0	Epicardial Progenitors	AKAP12
TCEAL9	1.10222	0.921	0.796	0	Epicardial Progenitors	TCEAL9
S100A11	1.09831	0.945	0.747	0	Epicardial Progenitors	S100A11
LINC02381	1.073	0.604	0.144	0	Epicardial Progenitors	LINC02381
SEPTIN7	1.04171	0.995	0.964	0	Epicardial Progenitors	SEPTIN7
SYT10	1.03936	0.525	0.144	0	Epicardial Progenitors	SYT10
FBLN1	1.03443	0.913	0.634	0	Epicardial Progenitors	FBLN1
ANXA1	1.02126	0.337	0.103	0	Epicardial Progenitors	ANXA1
MARCKS	0.994865	0.939	0.708	0	Epicardial Progenitors	MARCKS
SEPTIN11	0.992379	0.905	0.741	0	Epicardial Progenitors	SEPTIN11
CSRP2	0.988411	0.972	0.866	0	Epicardial Progenitors	CSRP2
MYH10	0.97726	0.96	0.872	0	Epicardial Progenitors	MYH10
AHNAK	0.972997	0.887	0.61	0	Epicardial Progenitors	AHNAK
CCDC34	0.950097	0.844	0.653	0	Epicardial Progenitors	CCDC34
IFITM2	0.935448	0.883	0.576	0	Epicardial Progenitors	IFITM2
CCDC80	0.925608	0.799	0.4	0	Epicardial Progenitors	CCDC80
IL6ST	0.915463	0.837	0.483	0	Epicardial Progenitors	IL6ST
COL6A2	0.913089	0.887	0.546	0	Epicardial Progenitors	COL6A2
EIF4EBP1	0.904635	0.944	0.798	0	Epicardial Progenitors	EIF4EBP1
TGFBR3	0.897863	0.379	0.066	0	Epicardial Progenitors	TGFBR3
IFITM3	0.884924	0.989	0.899	0	Epicardial Progenitors	IFITM3
TIMP1	0.853339	0.848	0.65	0	Epicardial Progenitors	TIMP1
MDK	0.842519	1	0.991	0	Epicardial Progenitors	MDK
TUBA1B1	0.837094	0.979	0.914	0	Epicardial Progenitors	TUBA1B
ATP2B1	0.836246	0.891	0.693	0	Epicardial Progenitors	ATP2B1
RHOBTB3	0.819739	0.965	0.847	0	Epicardial Progenitors	RHOBTB3
CD99	0.819364	0.977	0.864	0	Epicardial Progenitors	CD99
BMP4	0.812977	0.643	0.25	0	Epicardial Progenitors	BMP4
ACTA2	0.808911	0.683	0.363	0	Epicardial Progenitors	ACTA2
COL6A1	0.798879	0.939	0.786	0	Epicardial Progenitors	COL6A1
NME4	0.789925	0.981	0.934	0	Epicardial Progenitors	NME4
FRZB	0.785956	0.369	0.076	0	Epicardial Progenitors	FRZB
WLS	0.784038	0.849	0.617	0	Epicardial Progenitors	WLS
ACTB1	0.771717	0.998	0.933	0	Epicardial Progenitors	ACTB
TPM4	0.770558	0.962	0.919	0	Epicardial Progenitors	TPM4
TGFBI	0.768811	0.331	0.05	0	Epicardial Progenitors	TGFBI
CENPW	0.76857	0.653	0.404	0	Epicardial Progenitors	CENPW
RHOU	0.765719	0.57	0.192	0	Epicardial Progenitors	RHOU
COL5A2	0.764426	0.695	0.344	0	Epicardial Progenitors	COL5A2
COL6A3	0.761589	0.401	0.069	0	Epicardial Progenitors	COL6A3
AUXG01000058.1	0.747474	0.554	0.291	0	Epicardial Progenitors	AUXG01000058.1
LIX1	0.744523	0.666	0.34	0	Epicardial Progenitors	LIX1
CDK6	0.744384	0.811	0.593	0	Epicardial Progenitors	CDK6
GPC3	0.743185	0.728	0.392	0	Epicardial Progenitors	GPC3
CEBPD	0.737544	0.462	0.207	0	Epicardial Progenitors	CEBPD
TMEM98	0.720899	0.837	0.635	0	Epicardial Progenitors	TMEM98
DSC2	0.718015	0.788	0.601	0	Epicardial Progenitors	DSC2
TMEM141	0.717386	0.959	0.857	0	Epicardial Progenitors	TMEM141
TMSB10	0.717072	0.998	0.962	0	Epicardial Progenitors	TMSB10
GLIPR2	0.695296	0.565	0.234	0	Epicardial Progenitors	GLIPR2
RSPO3	0.693058	0.45	0.158	0	Epicardial Progenitors	RSPO3
SPECC1	0.682865	0.743	0.506	0	Epicardial Progenitors	SPECC1
C4orf48	0.682799	0.913	0.77	0	Epicardial Progenitors	C4orf48
SH3BP5	0.681161	0.704	0.381	0	Epicardial Progenitors	SH3BP5
SH3BGRL3	0.675547	0.865	0.77	0	Epicardial Progenitors	SH3BGRL3
C1orf21	0.672204	0.685	0.406	0	Epicardial Progenitors	C1orf21
CHCHD2	0.669134	0.577	0.292	0	Epicardial Progenitors	CHCHD2
COBLL1	0.659817	0.532	0.203	0	Epicardial Progenitors	COBLL1
CCDC3	0.659807	0.463	0.139	0	Epicardial Progenitors	CCDC3
HMGN2	0.657366	0.97	0.918	0	Epicardial Progenitors	HMGN2
ACTG11	0.655792	0.999	0.921	0	Epicardial Progenitors	ACTG1
CNN3	0.651216	0.859	0.738	0	Epicardial Progenitors	CNN3
BAMBI	0.651071	0.86	0.632	0	Epicardial Progenitors	BAMBI
PLAT	0.649312	0.414	0.074	0	Epicardial Progenitors	PLAT
MPZL1	0.64697	0.764	0.562	0	Epicardial Progenitors	MPZL1
BEX3	0.644396	0.985	0.958	0	Epicardial Progenitors	BEX3
LIFR	0.640468	0.688	0.406	0	Epicardial Progenitors	LIFR
FAM114A1	0.639212	0.591	0.301	0	Epicardial Progenitors	FAM114A1
RCN1	0.635141	0.845	0.723	0	Epicardial Progenitors	RCN1
ITGA8	0.631244	0.396	0.081	0	Epicardial Progenitors	ITGA8
EMP3	0.624305	0.595	0.316	0	Epicardial Progenitors	EMP3
CDH11	0.617309	0.501	0.24	0	Epicardial Progenitors	CDH11
JDP2	0.606205	0.512	0.183	0	Epicardial Progenitors	JDP2
H3F3B	0.597897	0.995	0.968	0	Epicardial Progenitors	H3F3B
LAMC1	0.581655	0.822	0.668	0	Epicardial Progenitors	LAMC1
DCN	0.56642	0.22	0.017	0	Epicardial Progenitors	DCN
NRP2	0.565926	0.804	0.585	0	Epicardial Progenitors	NRP2
TUBB1	0.560137	0.996	0.96	0	Epicardial Progenitors	TUBB
HOXB4	0.558972	0.464	0.127	0	Epicardial Progenitors	HOXB4
ITM2C	0.551031	0.86	0.704	0	Epicardial Progenitors	ITM2C
PPIB	0.545066	0.965	0.927	0	Epicardial Progenitors	PPIB
ETS1	0.539997	0.448	0.145	0	Epicardial Progenitors	ETS1
S100A13	0.537523	0.871	0.737	0	Epicardial Progenitors	S100A13
COL5A1	0.530592	0.608	0.336	0	Epicardial Progenitors	COL5A1
GUCY1A1	0.511775	0.642	0.343	0	Epicardial Progenitors	GUCY1A1
MMP2	0.507834	0.552	0.272	0	Epicardial Progenitors	MMP2
FMOD	0.503394	0.283	0.041	0	Epicardial Progenitors	FMOD
PDGFRA	0.498777	0.775	0.488	0	Epicardial Progenitors	PDGFRA
LSAMP	0.490856	0.404	0.133	0	Epicardial Progenitors	LSAMP
PITX2	0.490596	0.498	0.252	0	Epicardial Progenitors	PITX2
BIN1	0.485855	0.561	0.296	0	Epicardial Progenitors	BIN1
SOX6	0.482055	0.375	0.087	0	Epicardial Progenitors	SOX6
FBN1	0.475178	0.352	0.102	0	Epicardial Progenitors	FBN1
TFPI	0.471475	0.454	0.178	0	Epicardial Progenitors	TFPI
AFAP1L2	0.466778	0.346	0.06	0	Epicardial Progenitors	AFAP1L2
PDE3A	0.464464	0.316	0.06	0	Epicardial Progenitors	PDE3A
MSX1	0.464139	0.382	0.148	0	Epicardial Progenitors	MSX1
DSC3	0.463792	0.345	0.077	0	Epicardial Progenitors	DSC3
DAB2	0.450939	0.483	0.216	0	Epicardial Progenitors	DAB2
HOXB6	0.449613	0.267	0.02	0	Epicardial Progenitors	HOXB6
PLXNA2	0.445518	0.462	0.203	0	Epicardial Progenitors	PLXNA2
MAB21L2	0.444573	0.301	0.035	0	Epicardial Progenitors	MAB21L2
RGS4	0.443644	0.283	0.054	0	Epicardial Progenitors	RGS4
PTGIS	0.436063	0.421	0.167	0	Epicardial Progenitors	PTGIS
PLCE1	0.435921	0.481	0.214	0	Epicardial Progenitors	PLCE1
AC002454.1	0.428521	0.327	0.088	0	Epicardial Progenitors	AC002454.1
KCNMA1	0.426515	0.293	0.061	0	Epicardial Progenitors	KCNMA1
PLAGL1	0.424961	0.4	0.167	0	Epicardial Progenitors	PLAGL1
MIR503HG	0.415168	0.295	0.094	0	Epicardial Progenitors	MIR503HG
BNC2	0.413022	0.308	0.079	0	Epicardial Progenitors	BNC2
WT1	0.410621	0.298	0.062	0	Epicardial Progenitors	WT1
NTRK2	0.395507	0.246	0.063	0	Epicardial Progenitors	NTRK2
ASXL3	0.394027	0.395	0.152	0	Epicardial Progenitors	ASXL3
MBNL2	0.392418	0.448	0.189	0	Epicardial Progenitors	MBNL2
HOXB2	0.390193	0.367	0.145	0	Epicardial Progenitors	HOXB2
HOXB3	0.383419	0.349	0.112	0	Epicardial Progenitors	HOXB3
CPED1	0.380254	0.245	0.045	0	Epicardial Progenitors	CPED1
PRRX1	0.379077	0.166	0.03	0	Epicardial Progenitors	PRRX1
HOXB5	0.376579	0.258	0.032	0	Epicardial Progenitors	HOXB5
GNG2	0.373425	0.345	0.107	0	Epicardial Progenitors	GNG2
DDR2	0.371702	0.298	0.062	0	Epicardial Progenitors	DDR2
ADGRA2	0.370313	0.383	0.118	0	Epicardial Progenitors	ADGRA2
SNAI2	0.368313	0.318	0.085	0	Epicardial Progenitors	SNAI2
MYRF	0.363303	0.414	0.17	0	Epicardial Progenitors	MYRF
CRB2	0.362662	0.431	0.178	0	Epicardial Progenitors	CRB2
SVEP1	0.353179	0.321	0.105	0	Epicardial Progenitors	SVEP1
BNC1	0.343173	0.281	0.049	0	Epicardial Progenitors	BNC1
PDGFRB	0.342505	0.317	0.079	0	Epicardial Progenitors	PDGFRB
IGF2-AS	0.335628	0.233	0.028	0	Epicardial Progenitors	IGF2-AS
PRDM6	0.331611	0.279	0.052	0	Epicardial Progenitors	PRDM6
HOXB-AS3	0.324309	0.136	0.006	0	Epicardial Progenitors	HOXB-AS3
SHISA3	0.307661	0.159	0.025	0	Epicardial Progenitors	SHISA3
SMOC2	0.298846	0.248	0.042	0	Epicardial Progenitors	SMOC2
LHX2	0.278055	0.206	0.04	0	Epicardial Progenitors	LHX2
LRRC32	0.261255	0.242	0.058	0	Epicardial Progenitors	LRRC32
WASF1	0.498259	0.593	0.358	6.28e-303	Epicardial Progenitors	WASF1
PCDH18	0.314341	0.305	0.1	1.02e-301	Epicardial Progenitors	PCDH18
SLN	0.358979	0.141	0.021	1.07e-300	Epicardial Progenitors	SLN
FTL	0.714718	0.995	0.984	5.87e-300	Epicardial Progenitors	FTL
KCTD12	0.539307	0.499	0.242	4.34e-299	Epicardial Progenitors	KCTD12
ADAM12	0.267459	0.195	0.045	3.33e-286	Epicardial Progenitors	ADAM12
ATP10D	0.295816	0.242	0.071	1.98e-285	Epicardial Progenitors	ATP10D
ARHGAP10	0.471481	0.574	0.336	1.53e-284	Epicardial Progenitors	ARHGAP10
HNRNPDL1	0.427212	0.98	0.942	2.93e-284	Epicardial Progenitors	HNRNPDL
SERPINB91	0.564932	0.641	0.385	1.55e-283	Epicardial Progenitors	SERPINB9
DOK4	0.496122	0.703	0.442	4.28e-282	Epicardial Progenitors	DOK4
LGALS1	1.07664	0.466	0.251	1.65e-279	Epicardial Progenitors	LGALS1
FKBP7	0.318629	0.367	0.149	6.76e-277	Epicardial Progenitors	FKBP7
SERPINH1	0.516393	0.881	0.812	7.18e-271	Epicardial Progenitors	SERPINH1
PBK	0.442212	0.367	0.161	3.38e-269	Epicardial Progenitors	PBK
CYTOR	0.336472	0.263	0.089	3.43e-268	Epicardial Progenitors	CYTOR
CREB3L1	0.277697	0.306	0.113	1.52e-267	Epicardial Progenitors	CREB3L1
PXK	0.43876	0.425	0.205	4.4e-263	Epicardial Progenitors	PXK
KCNQ1OT1	0.625445	0.859	0.722	1.06e-261	Epicardial Progenitors	KCNQ1OT1
PTN	0.746582	0.691	0.5	1.31e-260	Epicardial Progenitors	PTN
TAGLN	1.18973	0.686	0.453	1.18e-256	Epicardial Progenitors	TAGLN
TM4SF1	0.31877	0.173	0.039	3.65e-256	Epicardial Progenitors	TM4SF1
ST3GAL5	0.354463	0.342	0.143	2.08e-255	Epicardial Progenitors	ST3GAL5
GAP431	0.657999	0.429	0.221	3.45e-253	Epicardial Progenitors	GAP43
CALR	0.537086	0.961	0.92	9.06e-251	Epicardial Progenitors	CALR
RAB37	0.274498	0.22	0.065	1.37e-248	Epicardial Progenitors	RAB37
FSTL1	0.503977	0.846	0.758	6.4e-247	Epicardial Progenitors	FSTL1
GPX8	0.471531	0.631	0.457	5.48e-246	Epicardial Progenitors	GPX8
STMN1	0.511115	0.968	0.914	1.81e-245	Epicardial Progenitors	STMN1
GNG12	0.426791	0.485	0.279	4.6e-245	Epicardial Progenitors	GNG12
ZNF641	0.332667	0.286	0.108	3.72e-243	Epicardial Progenitors	ZNF641
DIAPH3	0.60264	0.52	0.331	2.06e-242	Epicardial Progenitors	DIAPH3
ITGA1	0.482535	0.322	0.133	1.08e-238	Epicardial Progenitors	ITGA1
MME	0.259845	0.216	0.065	1.23e-237	Epicardial Progenitors	MME
PKIG	0.512781	0.742	0.564	5.11e-237	Epicardial Progenitors	PKIG
NUAK1	0.494805	0.5	0.291	4.14e-236	Epicardial Progenitors	NUAK1
RGS5	0.64076	0.629	0.388	2.16e-235	Epicardial Progenitors	RGS5
PAPPA	0.465473	0.302	0.118	2.35e-234	Epicardial Progenitors	PAPPA
ARID5B	0.421887	0.334	0.141	6.56e-234	Epicardial Progenitors	ARID5B
PLK2	0.645749	0.508	0.283	2.14e-233	Epicardial Progenitors	PLK2
KLF6	0.537546	0.497	0.295	1.5e-232	Epicardial Progenitors	KLF6
SBSPON	0.268613	0.224	0.071	2.84e-232	Epicardial Progenitors	SBSPON
HMGB2	0.861332	0.783	0.669	5.87e-232	Epicardial Progenitors	HMGB2
ANXA2	0.850303	0.758	0.666	1.68e-231	Epicardial Progenitors	ANXA2
DCTN3	0.423912	0.723	0.558	4.05e-231	Epicardial Progenitors	DCTN3
CKAP4	0.50205	0.763	0.666	4.76e-231	Epicardial Progenitors	CKAP4
BOC	0.280722	0.223	0.07	6.34e-231	Epicardial Progenitors	BOC
SERPINB6	0.467098	0.767	0.616	1.25e-229	Epicardial Progenitors	SERPINB6
PLS3	0.574212	0.709	0.59	3.23e-228	Epicardial Progenitors	PLS3
ZEB2	0.389766	0.533	0.301	6.36e-226	Epicardial Progenitors	ZEB2
PPIC	0.434182	0.759	0.528	2.03e-225	Epicardial Progenitors	PPIC
CDC42EP1	0.28124	0.319	0.133	2.46e-224	Epicardial Progenitors	CDC42EP1
TCF41	0.501768	0.796	0.634	3.61e-223	Epicardial Progenitors	TCF4
CAPN2	0.424615	0.541	0.344	3.56e-221	Epicardial Progenitors	CAPN2
MEIS2	0.388446	0.876	0.626	4.4e-219	Epicardial Progenitors	MEIS2
EIF2S21	0.487373	0.965	0.918	4.06e-218	Epicardial Progenitors	EIF2S2
DSG2	0.530003	0.812	0.69	1.13e-217	Epicardial Progenitors	DSG2
GYPC	0.427588	0.838	0.701	4.16e-217	Epicardial Progenitors	GYPC
FILIP1L	0.365422	0.275	0.103	5.05e-217	Epicardial Progenitors	FILIP1L
TMSB4X	0.675537	0.941	0.82	9.34e-216	Epicardial Progenitors	TMSB4X
TNC	0.445375	0.348	0.157	3.1e-213	Epicardial Progenitors	TNC
MZT2B	0.353148	0.952	0.916	8.82e-210	Epicardial Progenitors	MZT2B
KIF5B	0.425973	0.881	0.834	1.59e-209	Epicardial Progenitors	KIF5B
REXO2	0.531285	0.678	0.556	7.86e-209	Epicardial Progenitors	REXO2
LMAN1	0.404311	0.856	0.796	2.68e-208	Epicardial Progenitors	LMAN1
CALU	0.49619	0.895	0.863	5.2e-208	Epicardial Progenitors	CALU
CTSV	0.600065	0.788	0.669	1.09e-204	Epicardial Progenitors	CTSV
SPCS3	0.435679	0.764	0.673	4.11e-204	Epicardial Progenitors	SPCS3
KDELR2	0.496577	0.723	0.623	1.65e-203	Epicardial Progenitors	KDELR2
RGL1	0.272827	0.335	0.152	3.82e-202	Epicardial Progenitors	RGL1
TMEM14C	0.449289	0.93	0.873	4.2e-201	Epicardial Progenitors	TMEM14C
RBMS3	0.303029	0.359	0.171	2e-200	Epicardial Progenitors	RBMS3
CDKN1C	0.496736	0.664	0.481	2.07e-200	Epicardial Progenitors	CDKN1C
MTPN	0.364602	0.908	0.852	4.32e-200	Epicardial Progenitors	MTPN
FAM89A	0.380591	0.578	0.354	5.88e-199	Epicardial Progenitors	FAM89A
NID2	0.35521	0.714	0.457	1.33e-197	Epicardial Progenitors	NID2
IER5L	0.343485	0.451	0.248	1.57e-197	Epicardial Progenitors	IER5L
PRDX6	0.355863	0.986	0.963	1.06e-196	Epicardial Progenitors	PRDX6
TAX1BP1	0.430982	0.878	0.841	1.48e-196	Epicardial Progenitors	TAX1BP1
YARS	0.445087	0.718	0.563	1.21e-195	Epicardial Progenitors	YARS
LOX	0.372775	0.211	0.071	2.06e-195	Epicardial Progenitors	LOX
FLRT2	0.360086	0.473	0.266	1.34e-194	Epicardial Progenitors	FLRT2
LEPROTL1	0.488473	0.701	0.577	3.72e-194	Epicardial Progenitors	LEPROTL1
PPFIBP1	0.421404	0.651	0.474	5e-194	Epicardial Progenitors	PPFIBP1
ELK3	0.317865	0.409	0.219	1.89e-193	Epicardial Progenitors	ELK3
CALM2	0.452711	0.968	0.947	1.91e-193	Epicardial Progenitors	CALM2
GABARAP	0.34226	0.97	0.95	2.72e-193	Epicardial Progenitors	GABARAP
IKBIP	0.446227	0.545	0.389	5.76e-192	Epicardial Progenitors	IKBIP
RERE	0.420866	0.839	0.755	2.6e-191	Epicardial Progenitors	RERE
IFI16	0.328808	0.462	0.243	5.87e-191	Epicardial Progenitors	IFI16
FZD2	0.366243	0.547	0.355	5.62e-190	Epicardial Progenitors	FZD2
CLTA1	0.34299	0.952	0.911	4.12e-187	Epicardial Progenitors	CLTA
BCAT1	0.427875	0.757	0.59	5.2e-187	Epicardial Progenitors	BCAT1
LMCD1	0.38555	0.247	0.1	5.62e-186	Epicardial Progenitors	LMCD1
PKDCC	0.375167	0.521	0.323	2.11e-185	Epicardial Progenitors	PKDCC
RAD21	0.495242	0.882	0.827	2.13e-185	Epicardial Progenitors	RAD21
RELN	0.382898	0.389	0.198	8.19e-185	Epicardial Progenitors	RELN
PRTG	0.420601	0.758	0.564	1.38e-184	Epicardial Progenitors	PRTG
HMGB11	0.465746	0.994	0.983	2.45e-184	Epicardial Progenitors	HMGB1
CDK1	0.639242	0.486	0.31	4.75e-183	Epicardial Progenitors	CDK1
MXD3	0.263831	0.225	0.086	5.05e-182	Epicardial Progenitors	MXD3
SEC61B	0.417599	0.912	0.863	1.78e-181	Epicardial Progenitors	SEC61B
SARAF	0.379387	0.805	0.722	1.85e-181	Epicardial Progenitors	SARAF
CCN1	0.597996	0.499	0.317	3.91e-181	Epicardial Progenitors	CCN1
JUN	0.545932	0.69	0.511	6.47e-181	Epicardial Progenitors	JUN
EIF1	0.335413	0.997	0.989	2.34e-180	Epicardial Progenitors	EIF1
RESF1	0.408576	0.77	0.629	3.51e-179	Epicardial Progenitors	RESF1
MT2A	0.778176	0.357	0.183	1.99e-178	Epicardial Progenitors	MT2A
TUBA1A	0.638588	0.853	0.764	7.04e-178	Epicardial Progenitors	TUBA1A
HAPLN1	0.367271	0.441	0.231	1.29e-177	Epicardial Progenitors	HAPLN1
RBM3	0.36811	0.838	0.744	1.79e-176	Epicardial Progenitors	RBM3
RAC11	0.32241	0.964	0.929	2.25e-176	Epicardial Progenitors	RAC1
FGFR2	0.426493	0.468	0.294	1.94e-175	Epicardial Progenitors	FGFR2
PTMS	0.355784	0.966	0.942	2.71e-175	Epicardial Progenitors	PTMS
TAGLN2	0.658242	0.533	0.391	6.61e-175	Epicardial Progenitors	TAGLN2
NUSAP1	0.7987	0.565	0.406	1.8e-174	Epicardial Progenitors	NUSAP1
ATF3	0.414837	0.323	0.158	6.46e-174	Epicardial Progenitors	ATF3
PHACTR2	0.426066	0.763	0.643	5.03e-173	Epicardial Progenitors	PHACTR2
GATA5	0.310353	0.414	0.224	5.64e-173	Epicardial Progenitors	GATA5
TPM2	0.524991	0.952	0.915	6.89e-173	Epicardial Progenitors	TPM2
CYB5D1	0.377768	0.311	0.154	8.03e-173	Epicardial Progenitors	CYB5D1
PLAC9	0.258032	0.254	0.103	9.24e-173	Epicardial Progenitors	PLAC9
ARL4D	0.278564	0.41	0.222	1.02e-172	Epicardial Progenitors	ARL4D
PDCD4	0.430813	0.565	0.388	4.43e-171	Epicardial Progenitors	PDCD4
KIRREL1	0.263978	0.342	0.172	4.59e-171	Epicardial Progenitors	KIRREL1
GPRC5C	0.360317	0.507	0.315	1.29e-170	Epicardial Progenitors	GPRC5C
SEC62	0.352113	0.89	0.845	1.47e-170	Epicardial Progenitors	SEC62
SERINC3	0.466026	0.647	0.501	1.7e-169	Epicardial Progenitors	SERINC3
ASH2L	0.38495	0.59	0.423	5.18e-169	Epicardial Progenitors	ASH2L
TOP2A	0.932916	0.628	0.47	8.41e-169	Epicardial Progenitors	TOP2A
CGNL1	0.361717	0.821	0.667	1.8e-168	Epicardial Progenitors	CGNL1
EML4	0.357257	0.727	0.591	2e-168	Epicardial Progenitors	EML4
KLF10	0.263716	0.304	0.143	3.67e-167	Epicardial Progenitors	KLF10
EFNB2	0.445708	0.444	0.277	1e-166	Epicardial Progenitors	EFNB2
SLBP	0.403642	0.642	0.504	1.63e-166	Epicardial Progenitors	SLBP
LEF1	0.274944	0.363	0.185	3.48e-166	Epicardial Progenitors	LEF1
HMGA2	0.419705	0.699	0.59	9.39e-166	Epicardial Progenitors	HMGA2
H1FX	0.486328	0.897	0.835	1.35e-165	Epicardial Progenitors	H1FX
SNCAIP	0.255558	0.282	0.127	2.44e-165	Epicardial Progenitors	SNCAIP
CHD3	0.383022	0.625	0.464	2.6e-165	Epicardial Progenitors	CHD3
PARVA	0.331878	0.486	0.31	4.02e-165	Epicardial Progenitors	PARVA
PCDH7	0.321007	0.787	0.576	1.68e-163	Epicardial Progenitors	PCDH7
TERF1	0.395463	0.791	0.647	1.97e-162	Epicardial Progenitors	TERF1
EVA1B	0.41665	0.572	0.413	3.71e-162	Epicardial Progenitors	EVA1B
DNAJC1	0.380041	0.64	0.487	5.51e-162	Epicardial Progenitors	DNAJC1
KDELR1	0.342798	0.958	0.928	1.12e-161	Epicardial Progenitors	KDELR1
LGR4	0.445468	0.6	0.427	6.13e-161	Epicardial Progenitors	LGR4
PDLIM4	0.342013	0.402	0.234	9.01e-161	Epicardial Progenitors	PDLIM4
HIST1H1A1	0.843906	0.473	0.298	3.48e-160	Epicardial Progenitors	HIST1H1A
BZW1	0.361485	0.911	0.851	1.03e-159	Epicardial Progenitors	BZW1
BIRC5	0.566176	0.604	0.438	1.13e-159	Epicardial Progenitors	BIRC5
LOXL1	0.252843	0.264	0.118	3.66e-159	Epicardial Progenitors	LOXL1
H2AFZ1	0.460945	0.961	0.915	4.18e-159	Epicardial Progenitors	H2AFZ
KRT19	0.310209	0.955	0.887	5.66e-159	Epicardial Progenitors	KRT19
ANK3	0.483217	0.728	0.593	1.85e-158	Epicardial Progenitors	ANK3
HP1BP3	0.405003	0.799	0.726	1.15e-157	Epicardial Progenitors	HP1BP3
CPE	0.386343	0.598	0.413	8.41e-157	Epicardial Progenitors	CPE
RRBP1	0.357349	0.832	0.731	1.59e-156	Epicardial Progenitors	RRBP1
H2AFJ	0.493223	0.653	0.511	1.61e-156	Epicardial Progenitors	H2AFJ
MICAL2	0.449392	0.477	0.308	2.35e-156	Epicardial Progenitors	MICAL2
ENAH	0.387845	0.92	0.875	3.87e-156	Epicardial Progenitors	ENAH
PPDPF	0.329823	0.934	0.903	8.08e-156	Epicardial Progenitors	PPDPF
SEMA5A	0.334315	0.471	0.285	2.87e-155	Epicardial Progenitors	SEMA5A
GLI3	0.260446	0.362	0.195	4.14e-155	Epicardial Progenitors	GLI3
PDLIM2	0.406641	0.703	0.611	4.97e-155	Epicardial Progenitors	PDLIM2
FLNA	0.410638	0.773	0.669	5.67e-153	Epicardial Progenitors	FLNA
SMC4	0.60717	0.672	0.577	1.36e-152	Epicardial Progenitors	SMC4
MAML2	0.278045	0.372	0.205	2.1e-152	Epicardial Progenitors	MAML2
PRC1	0.543792	0.478	0.322	2.65e-152	Epicardial Progenitors	PRC1
MAGED2	0.390588	0.832	0.772	3.15e-151	Epicardial Progenitors	MAGED2
TLN1	0.423814	0.802	0.75	7.08e-151	Epicardial Progenitors	TLN1
MALAT1	0.265176	0.996	0.993	7.1e-151	Epicardial Progenitors	MALAT1
HSPA5	0.482887	0.939	0.898	3.92e-150	Epicardial Progenitors	HSPA5
SLC1A5	0.42857	0.608	0.47	2.9e-149	Epicardial Progenitors	SLC1A5
GNG5	0.340276	0.967	0.948	1.04e-148	Epicardial Progenitors	GNG5
SLC3A2	0.50832	0.705	0.585	1.33e-148	Epicardial Progenitors	SLC3A2
ARPC2	0.462757	0.921	0.896	1.42e-148	Epicardial Progenitors	ARPC2
AC068987.3	0.315368	0.285	0.138	2.71e-148	Epicardial Progenitors	AC068987.3
INPP5F	0.382513	0.567	0.415	1.52e-146	Epicardial Progenitors	INPP5F
NXPH2	0.277804	0.312	0.157	3.53e-145	Epicardial Progenitors	NXPH2
PDLIM7	0.35431	0.668	0.524	4.03e-145	Epicardial Progenitors	PDLIM7
H2AFV	0.363663	0.829	0.756	3.86e-144	Epicardial Progenitors	H2AFV
TOP3A	0.387443	0.394	0.24	5.88e-144	Epicardial Progenitors	TOP3A
SKA2	0.394234	0.673	0.566	7.5e-144	Epicardial Progenitors	SKA2
RAB34	0.355469	0.765	0.677	8.81e-144	Epicardial Progenitors	RAB34
KIFAP3	0.394887	0.573	0.382	1.71e-143	Epicardial Progenitors	KIFAP3
NUF2	0.37947	0.362	0.21	3.56e-143	Epicardial Progenitors	NUF2
CDC42	0.297244	0.939	0.923	2.29e-142	Epicardial Progenitors	CDC42
MRC2	0.338522	0.628	0.46	3.86e-142	Epicardial Progenitors	MRC2
CKS1B1	0.523122	0.705	0.6	6.39e-141	Epicardial Progenitors	CKS1B
AHCYL1	0.433104	0.764	0.683	6.59e-141	Epicardial Progenitors	AHCYL1
IQGAP11	0.350771	0.632	0.482	4.26e-139	Epicardial Progenitors	IQGAP1
TSPAN5	0.406068	0.514	0.37	4.39e-139	Epicardial Progenitors	TSPAN5
EXT1	0.337489	0.532	0.381	5.1e-139	Epicardial Progenitors	EXT1
FAM107B	0.365305	0.531	0.366	1.07e-138	Epicardial Progenitors	FAM107B
ID3	0.432195	0.88	0.8	4.37e-138	Epicardial Progenitors	ID3
DZIP1	0.250546	0.348	0.19	1.29e-137	Epicardial Progenitors	DZIP1
FRMD4B	0.311279	0.619	0.426	1.47e-137	Epicardial Progenitors	FRMD4B
TERF2IP	0.365098	0.661	0.528	2.09e-137	Epicardial Progenitors	TERF2IP
KCNK6	0.3053	0.349	0.193	2.23e-137	Epicardial Progenitors	KCNK6
NECTIN2	0.332837	0.681	0.562	2.01e-136	Epicardial Progenitors	NECTIN2
HSP90B1	0.329119	0.992	0.98	3.37e-136	Epicardial Progenitors	HSP90B1
SMC5	0.364182	0.617	0.484	1.75e-135	Epicardial Progenitors	SMC5
NOTCH2	0.303897	0.448	0.293	6.14e-135	Epicardial Progenitors	NOTCH2
RFTN1	0.270977	0.356	0.195	7.25e-135	Epicardial Progenitors	RFTN1
SERPING1	0.312156	0.482	0.314	3.79e-134	Epicardial Progenitors	SERPING1
ZFHX3	0.289064	0.532	0.359	1.59e-133	Epicardial Progenitors	ZFHX3
PPP1R15A	0.410145	0.564	0.417	1.91e-133	Epicardial Progenitors	PPP1R15A
KRTCAP2	0.32249	0.863	0.808	3.63e-133	Epicardial Progenitors	KRTCAP2
MKI67	0.716601	0.522	0.372	4.84e-133	Epicardial Progenitors	MKI67
TSPAN4	0.356899	0.573	0.438	4.95e-133	Epicardial Progenitors	TSPAN4
ARHGAP28	0.330109	0.446	0.285	1.05e-132	Epicardial Progenitors	ARHGAP28
P4HB	0.387162	0.837	0.816	3.59e-132	Epicardial Progenitors	P4HB
DAD1	0.333698	0.825	0.776	1.71e-131	Epicardial Progenitors	DAD1
TMPO	0.427282	0.779	0.707	1.21e-130	Epicardial Progenitors	TMPO
KNL1	0.378494	0.358	0.213	1.61e-130	Epicardial Progenitors	KNL1
PDIA6	0.315129	0.954	0.924	2.19e-130	Epicardial Progenitors	PDIA6
CENPF	0.907561	0.685	0.559	4.42e-130	Epicardial Progenitors	CENPF
TUT4	0.377839	0.83	0.77	2.19e-129	Epicardial Progenitors	TUT4
HIST1H3D	0.382741	0.306	0.164	2.62e-129	Epicardial Progenitors	HIST1H3D
MYL12B	0.466919	0.86	0.817	3.68e-129	Epicardial Progenitors	MYL12B
DNAJC9	0.361002	0.548	0.422	3.59e-128	Epicardial Progenitors	DNAJC9
KDR	0.390879	0.493	0.346	4.83e-128	Epicardial Progenitors	KDR
RAB31	0.360379	0.589	0.465	6.34e-128	Epicardial Progenitors	RAB31
CKAP2	0.578986	0.59	0.48	7.14e-128	Epicardial Progenitors	CKAP2
SMARCA2	0.290134	0.379	0.226	9.84e-128	Epicardial Progenitors	SMARCA2
NCAM1	0.337962	0.57	0.386	5.2e-127	Epicardial Progenitors	NCAM1
ITGB1	0.439807	0.946	0.939	7.48e-127	Epicardial Progenitors	ITGB1
RABL6	0.33124	0.815	0.743	8.53e-127	Epicardial Progenitors	RABL6
TPX2	0.70902	0.554	0.421	1.19e-126	Epicardial Progenitors	TPX2
PBX3	0.364045	0.66	0.531	3.91e-126	Epicardial Progenitors	PBX3
CREG1	0.302494	0.492	0.335	1.25e-125	Epicardial Progenitors	CREG1
ID2	0.389535	0.777	0.665	1.26e-125	Epicardial Progenitors	ID2
HDLBP	0.329554	0.865	0.825	1.18e-124	Epicardial Progenitors	HDLBP
CBX5	0.319652	0.947	0.923	3.07e-124	Epicardial Progenitors	CBX5
CREB3L2	0.296388	0.492	0.341	8.31e-124	Epicardial Progenitors	CREB3L2
LIMS1	0.414791	0.632	0.554	8.64e-124	Epicardial Progenitors	LIMS1
EDIL3	0.30247	0.348	0.202	2.55e-123	Epicardial Progenitors	EDIL3
TMEM14B	0.344121	0.898	0.841	4.31e-123	Epicardial Progenitors	TMEM14B
NPC2	0.454681	0.916	0.883	2.64e-122	Epicardial Progenitors	NPC2
OSTC	0.328314	0.879	0.842	2.68e-122	Epicardial Progenitors	OSTC
SSR2	0.279891	0.896	0.85	3.35e-122	Epicardial Progenitors	SSR2
ARID3A	0.338459	0.691	0.581	9.34e-122	Epicardial Progenitors	ARID3A
MEIS3	0.250286	0.447	0.284	1.65e-121	Epicardial Progenitors	MEIS3
ECE1	0.327309	0.505	0.36	2.68e-121	Epicardial Progenitors	ECE1
GTSE1	0.442165	0.405	0.265	2.98e-121	Epicardial Progenitors	GTSE1
SEC31A	0.332981	0.757	0.697	4.14e-121	Epicardial Progenitors	SEC31A
RABAC1	0.337261	0.833	0.784	7.19e-121	Epicardial Progenitors	RABAC1
EZH2	0.359441	0.537	0.406	1.36e-120	Epicardial Progenitors	EZH2
SLC2A4RG	0.273455	0.446	0.302	1.84e-120	Epicardial Progenitors	SLC2A4RG
PTTG1	0.649559	0.651	0.52	1.21e-119	Epicardial Progenitors	PTTG1
ASPM	0.638411	0.504	0.363	1.57e-119	Epicardial Progenitors	ASPM
MED13L	0.298206	0.682	0.56	4.84e-119	Epicardial Progenitors	MED13L
CDCA3	0.291779	0.284	0.153	3e-118	Epicardial Progenitors	CDCA3
DCP2	0.334213	0.756	0.652	3.55e-118	Epicardial Progenitors	DCP2
RHOA	0.291235	0.91	0.887	5.83e-118	Epicardial Progenitors	RHOA
ARPC5	0.360359	0.783	0.741	1.02e-116	Epicardial Progenitors	ARPC5
NFE2L2	0.337345	0.622	0.506	2.46e-116	Epicardial Progenitors	NFE2L2
CTHRC1	0.257679	0.223	0.103	5.14e-116	Epicardial Progenitors	CTHRC1
HIST1H4C1	0.816632	0.951	0.923	1.87e-115	Epicardial Progenitors	HIST1H4C
RGS3	0.279094	0.38	0.232	3.49e-115	Epicardial Progenitors	RGS3
RUNX1T1	0.329816	0.657	0.528	1.08e-114	Epicardial Progenitors	RUNX1T1
MAGED1	0.301503	0.71	0.603	1.28e-113	Epicardial Progenitors	MAGED1
ANXA5	0.37734	0.868	0.827	1.89e-113	Epicardial Progenitors	ANXA5
H2AFX	0.395277	0.457	0.328	7.2e-112	Epicardial Progenitors	H2AFX
RAP1B	0.291623	0.677	0.596	1.38e-111	Epicardial Progenitors	RAP1B
UBE2E3	0.294815	0.792	0.715	5.46e-111	Epicardial Progenitors	UBE2E3
CD151	0.311844	0.727	0.652	1.89e-110	Epicardial Progenitors	CD151
CEP55	0.338109	0.305	0.176	2.05e-110	Epicardial Progenitors	CEP55
COTL1	0.428114	0.505	0.394	2.6e-110	Epicardial Progenitors	COTL1
ITGB3BP1	0.349911	0.569	0.435	3.12e-110	Epicardial Progenitors	ITGB3BP
CKAP2L	0.262228	0.266	0.141	3.3e-110	Epicardial Progenitors	CKAP2L
NDC80	0.411203	0.346	0.216	6.24e-110	Epicardial Progenitors	NDC80
YIF1A	0.32133	0.621	0.525	4.23e-109	Epicardial Progenitors	YIF1A
STOM	0.289265	0.317	0.187	8.94e-109	Epicardial Progenitors	STOM
UBE2C	0.566772	0.435	0.292	1.63e-108	Epicardial Progenitors	UBE2C
PSMD8	0.278409	0.888	0.854	3.31e-108	Epicardial Progenitors	PSMD8
PDIA31	0.289428	0.957	0.913	8.24e-108	Epicardial Progenitors	PDIA3
HIST1H3B	0.534397	0.411	0.276	8.56e-108	Epicardial Progenitors	HIST1H3B
UBXN4	0.273361	0.912	0.874	9.05e-108	Epicardial Progenitors	UBXN4
HACD3	0.293142	0.78	0.7	5.52e-106	Epicardial Progenitors	HACD3
SRSF31	0.273189	0.955	0.893	6.62e-106	Epicardial Progenitors	SRSF3
ISYNA1	0.321944	0.793	0.733	7.22e-106	Epicardial Progenitors	ISYNA1
ATOX1	0.282665	0.826	0.769	8.97e-106	Epicardial Progenitors	ATOX1
SUCO	0.357508	0.639	0.531	1.02e-105	Epicardial Progenitors	SUCO
SPATS2L	0.38075	0.651	0.57	1.07e-105	Epicardial Progenitors	SPATS2L
L3MBTL3	0.263017	0.305	0.175	9.93e-105	Epicardial Progenitors	L3MBTL3
PLD3	0.336021	0.726	0.62	1.11e-104	Epicardial Progenitors	PLD3
PCLAF1	0.405482	0.557	0.432	1.4e-104	Epicardial Progenitors	PCLAF
COPS6	0.298448	0.793	0.744	1.4e-104	Epicardial Progenitors	COPS6
EDN1	0.361318	0.167	0.069	3.99e-104	Epicardial Progenitors	EDN1
CCN2	0.814575	0.382	0.249	9.58e-104	Epicardial Progenitors	CCN2
HCFC1R1	0.332559	0.596	0.479	1.58e-102	Epicardial Progenitors	HCFC1R1
FOS	0.493484	0.488	0.353	1.94e-102	Epicardial Progenitors	FOS
HES11	0.352625	0.565	0.42	2.27e-102	Epicardial Progenitors	HES1
PTPN13	0.287468	0.691	0.56	2.4e-102	Epicardial Progenitors	PTPN13
CNN2	0.295437	0.811	0.744	3.09e-102	Epicardial Progenitors	CNN2
PRR11	0.330448	0.377	0.247	7.03e-102	Epicardial Progenitors	PRR11
MYH9	0.413641	0.686	0.618	4.49e-101	Epicardial Progenitors	MYH9
PCOLCE	0.273098	0.379	0.24	5.63e-101	Epicardial Progenitors	PCOLCE
MYO6	0.380369	0.628	0.509	2.68e-100	Epicardial Progenitors	MYO6
ARF4	0.323951	0.678	0.616	2.85e-100	Epicardial Progenitors	ARF4
PSMA71	0.271022	0.973	0.945	4.59e-100	Epicardial Progenitors	PSMA7
CSRP1	0.371479	0.323	0.198	3.78e-98	Epicardial Progenitors	CSRP1
TRA2B	0.298198	0.808	0.742	4.41e-98	Epicardial Progenitors	TRA2B
CNTLN	0.285662	0.485	0.355	5.81e-98	Epicardial Progenitors	CNTLN
KIF23	0.309563	0.334	0.208	6.49e-98	Epicardial Progenitors	KIF23
MAD2L11	0.344129	0.511	0.384	9.43e-98	Epicardial Progenitors	MAD2L1
SPC25	0.318954	0.391	0.261	1.46e-97	Epicardial Progenitors	SPC25
DEPDC1	0.372754	0.361	0.233	2.74e-97	Epicardial Progenitors	DEPDC1
MSN	0.267417	0.574	0.468	4.33e-97	Epicardial Progenitors	MSN
ORC6	0.368363	0.608	0.505	4.49e-97	Epicardial Progenitors	ORC6
CLIC1	0.311353	0.871	0.842	5.59e-97	Epicardial Progenitors	CLIC1
RHOC	0.333775	0.702	0.629	6.56e-97	Epicardial Progenitors	RHOC
RALY	0.319119	0.689	0.6	8.09e-97	Epicardial Progenitors	RALY
CENPU1	0.360664	0.474	0.352	1.84e-96	Epicardial Progenitors	CENPU
KIF2A	0.27779	0.736	0.658	5.25e-96	Epicardial Progenitors	KIF2A
NNAT	0.361814	0.424	0.292	5.54e-96	Epicardial Progenitors	NNAT
DYNLT1	0.257653	0.804	0.738	5.63e-96	Epicardial Progenitors	DYNLT1
KLF3	0.282803	0.542	0.41	3.84e-95	Epicardial Progenitors	KLF3
NCAPG	0.384903	0.43	0.309	4.2e-95	Epicardial Progenitors	NCAPG
ANLN	0.335043	0.412	0.288	4.28e-95	Epicardial Progenitors	ANLN
CHSY1	0.301948	0.452	0.323	5.47e-95	Epicardial Progenitors	CHSY1
TMSB15A	0.290995	0.425	0.291	1.22e-94	Epicardial Progenitors	TMSB15A
KIF11	0.415091	0.436	0.316	1.42e-94	Epicardial Progenitors	KIF11
EAPP	0.299822	0.599	0.488	4.97e-94	Epicardial Progenitors	EAPP
GARS1	0.451184	0.704	0.629	5.39e-94	Epicardial Progenitors	GARS
ARCN1	0.294321	0.696	0.629	1.08e-93	Epicardial Progenitors	ARCN1
PON2	0.281672	0.49	0.368	1.74e-93	Epicardial Progenitors	PON2
LIN28B1	0.302111	0.638	0.504	3.38e-93	Epicardial Progenitors	LIN28B
SESN3	0.273422	0.507	0.376	7.93e-93	Epicardial Progenitors	SESN3
FHL3	0.252983	0.398	0.265	1.55e-92	Epicardial Progenitors	FHL3
MTDH	0.293363	0.844	0.81	5.4e-92	Epicardial Progenitors	MTDH
PSMC31	0.283105	0.825	0.761	5.9e-92	Epicardial Progenitors	PSMC3
AFDN	0.268904	0.857	0.821	7.4e-92	Epicardial Progenitors	AFDN
LOXL2	0.297916	0.375	0.248	8.85e-92	Epicardial Progenitors	LOXL2
RSPRY1	0.253077	0.443	0.314	1.15e-91	Epicardial Progenitors	RSPRY1
CLSPN1	0.385383	0.461	0.339	1.56e-91	Epicardial Progenitors	CLSPN
HMMR	0.577071	0.443	0.322	2.83e-91	Epicardial Progenitors	HMMR
SEPTIN9	0.279269	0.672	0.585	1.09e-90	Epicardial Progenitors	SEPTIN9
ARPC3	0.288429	0.858	0.833	1.16e-90	Epicardial Progenitors	ARPC3
ASXL1	0.253256	0.586	0.462	4.66e-90	Epicardial Progenitors	ASXL1
WFIKKN1	0.273309	0.325	0.205	4.14e-89	Epicardial Progenitors	WFIKKN1
MYDGF	0.343347	0.623	0.565	9.58e-89	Epicardial Progenitors	MYDGF
SLC39A6	0.280661	0.421	0.302	1.06e-88	Epicardial Progenitors	SLC39A6
RPP25	0.265826	0.425	0.301	1.33e-88	Epicardial Progenitors	RPP25
LBR	0.336679	0.568	0.459	1.43e-88	Epicardial Progenitors	LBR
AURKB	0.322489	0.388	0.262	2.85e-88	Epicardial Progenitors	AURKB
MIS18BP11	0.375342	0.618	0.51	3.36e-88	Epicardial Progenitors	MIS18BP1
CALCOCO2	0.291567	0.483	0.361	1.08e-87	Epicardial Progenitors	CALCOCO2
SDC2	0.298244	0.47	0.36	1.13e-87	Epicardial Progenitors	SDC2
HNRNPR	0.257962	0.908	0.871	1.58e-87	Epicardial Progenitors	HNRNPR
PHLDA1	0.320111	0.416	0.285	1.78e-87	Epicardial Progenitors	PHLDA1
TNPO1	0.277659	0.695	0.619	5.85e-87	Epicardial Progenitors	TNPO1
SGO1	0.302168	0.379	0.261	2.19e-86	Epicardial Progenitors	SGO1
FBXO17	0.263104	0.518	0.39	8.41e-86	Epicardial Progenitors	FBXO17
PFDN1	0.28237	0.758	0.714	1.28e-85	Epicardial Progenitors	PFDN1
CDKN3	0.500543	0.423	0.313	1.28e-84	Epicardial Progenitors	CDKN3
SARS1	0.372478	0.783	0.73	2.15e-84	Epicardial Progenitors	SARS
ANKRD11	0.292467	0.882	0.858	2.3e-84	Epicardial Progenitors	ANKRD11
KPNA2	0.573764	0.64	0.558	6.01e-84	Epicardial Progenitors	KPNA2
AC068587.4	0.33029	0.765	0.686	6.26e-84	Epicardial Progenitors	AC068587.4
CDCA8	0.394067	0.36	0.247	1.2e-83	Epicardial Progenitors	CDCA8
VPS28	0.252058	0.798	0.733	2.12e-83	Epicardial Progenitors	VPS28
CIR1	0.293894	0.684	0.592	7.63e-83	Epicardial Progenitors	CIR1
KIF18A	0.27977	0.298	0.185	1.08e-82	Epicardial Progenitors	KIF18A
P4HA2	0.31491	0.493	0.378	1.18e-82	Epicardial Progenitors	P4HA2
KIF2C	0.301248	0.338	0.223	2.74e-82	Epicardial Progenitors	KIF2C
FKBP10	0.254518	0.583	0.491	8.61e-82	Epicardial Progenitors	FKBP10
CDK5RAP3	0.275443	0.456	0.34	3.21e-81	Epicardial Progenitors	CDK5RAP3
NUCKS1	0.269673	0.987	0.977	5.11e-81	Epicardial Progenitors	NUCKS1
KIF4A	0.303689	0.349	0.233	1.14e-80	Epicardial Progenitors	KIF4A
MXD4	0.279661	0.442	0.324	1.93e-80	Epicardial Progenitors	MXD4
HIST1H1B1	0.62528	0.468	0.346	3.31e-79	Epicardial Progenitors	HIST1H1B
GADD45A	0.344886	0.586	0.485	3.68e-79	Epicardial Progenitors	GADD45A
LSM8	0.290635	0.665	0.603	4.86e-79	Epicardial Progenitors	LSM8
CXCL14	0.321211	0.199	0.099	7.86e-79	Epicardial Progenitors	CXCL14
DLGAP51	0.522691	0.48	0.359	1.89e-78	Epicardial Progenitors	DLGAP5
EZR	0.414875	0.877	0.853	2.02e-78	Epicardial Progenitors	EZR
KIF20B1	0.412481	0.54	0.44	2.72e-78	Epicardial Progenitors	KIF20B
RAB11FIP1	0.333867	0.593	0.515	2.77e-78	Epicardial Progenitors	RAB11FIP1
TXNIP	0.287265	0.335	0.216	7.72e-78	Epicardial Progenitors	TXNIP
TYMS	0.419387	0.575	0.51	1.25e-77	Epicardial Progenitors	TYMS
SIPA1L2	0.276609	0.666	0.527	1.78e-77	Epicardial Progenitors	SIPA1L2
CCNB2	0.412956	0.459	0.347	4.08e-77	Epicardial Progenitors	CCNB2
COPB1	0.262647	0.759	0.733	9.28e-77	Epicardial Progenitors	COPB1
MTHFD21	0.439887	0.627	0.53	1.49e-76	Epicardial Progenitors	MTHFD2
PLIN2	0.312834	0.608	0.509	1.28e-75	Epicardial Progenitors	PLIN2
SERP1	0.270675	0.764	0.723	1.57e-75	Epicardial Progenitors	SERP1
ANXA11	0.2548	0.556	0.459	1.64e-75	Epicardial Progenitors	ANXA11
SEPTIN10	0.262228	0.695	0.627	1.77e-75	Epicardial Progenitors	SEPTIN10
CRABP2	0.380144	0.771	0.731	4.06e-75	Epicardial Progenitors	CRABP2
ARHGDIA	0.266868	0.557	0.478	5.62e-75	Epicardial Progenitors	ARHGDIA
SULF1	0.259938	0.131	0.055	2.25e-74	Epicardial Progenitors	SULF1
ACTN1	0.470849	0.618	0.565	3.45e-74	Epicardial Progenitors	ACTN1
FRG1	0.263879	0.573	0.471	6.83e-74	Epicardial Progenitors	FRG1
SDC4	0.262822	0.446	0.329	6.59e-73	Epicardial Progenitors	SDC4
PDIA4	0.285929	0.775	0.721	8.98e-73	Epicardial Progenitors	PDIA4
SPDL1	0.37729	0.514	0.432	2.32e-72	Epicardial Progenitors	SPDL1
LSM51	0.2677	0.782	0.706	2.88e-72	Epicardial Progenitors	LSM5
EIF3M	0.255429	0.863	0.832	4.29e-72	Epicardial Progenitors	EIF3M
CENPK1	0.251028	0.41	0.302	7.13e-72	Epicardial Progenitors	CENPK
ARL6IP1	0.626139	0.744	0.694	8.58e-72	Epicardial Progenitors	ARL6IP1
CALM11	0.26056	0.94	0.886	9.85e-72	Epicardial Progenitors	CALM1
MAP4K5	0.271566	0.489	0.387	2.19e-71	Epicardial Progenitors	MAP4K5
ALDH2	0.303661	0.645	0.554	3.54e-71	Epicardial Progenitors	ALDH2
SESTD1	0.256308	0.421	0.31	8.2e-71	Epicardial Progenitors	SESTD1
XBP1	0.300736	0.603	0.53	1.72e-70	Epicardial Progenitors	XBP1
HJURP	0.280563	0.313	0.206	3.91e-70	Epicardial Progenitors	HJURP
MVB12A	0.262148	0.552	0.455	2.83e-69	Epicardial Progenitors	MVB12A
DYNLL1	0.304357	0.962	0.943	3.42e-69	Epicardial Progenitors	DYNLL1
JAK1	0.256193	0.532	0.439	2.76e-68	Epicardial Progenitors	JAK1
UBE2S1	0.454201	0.738	0.663	6.62e-68	Epicardial Progenitors	UBE2S
FN1	0.264714	0.714	0.626	6.75e-68	Epicardial Progenitors	FN1
YIPF5	0.268431	0.511	0.427	5.84e-67	Epicardial Progenitors	YIPF5
CCNA2	0.327787	0.38	0.277	6.77e-67	Epicardial Progenitors	CCNA2
B2M	0.272013	0.729	0.685	1.41e-66	Epicardial Progenitors	B2M
LINC01578	0.276442	0.746	0.693	5.16e-66	Epicardial Progenitors	LINC01578
LMNB11	0.29133	0.626	0.546	1.04e-65	Epicardial Progenitors	LMNB1
CENPE1	0.548284	0.443	0.34	2.2e-65	Epicardial Progenitors	CENPE
BASP1	0.250062	0.704	0.607	6.46e-65	Epicardial Progenitors	BASP1
MANF	0.314998	0.566	0.506	9.38e-65	Epicardial Progenitors	MANF
BTG3	0.273229	0.595	0.525	1.3e-64	Epicardial Progenitors	BTG3
PHLDB2	0.285628	0.47	0.381	1.4e-64	Epicardial Progenitors	PHLDB2
GOLGA7	0.25782	0.552	0.46	4.85e-63	Epicardial Progenitors	GOLGA7
ATAD2	0.357671	0.528	0.457	5.83e-62	Epicardial Progenitors	ATAD2
DTYMK1	0.26601	0.59	0.516	1.33e-60	Epicardial Progenitors	DTYMK
JPT11	0.356527	0.8	0.753	4.15e-60	Epicardial Progenitors	JPT1
ATF7IP2	0.257485	0.416	0.314	9.47e-60	Epicardial Progenitors	ATF7IP2
JUND	0.277121	0.841	0.806	1.56e-59	Epicardial Progenitors	JUND
MFGE8	0.280772	0.734	0.692	7.42e-59	Epicardial Progenitors	MFGE8
HIST1H3G	0.326479	0.298	0.203	1.78e-57	Epicardial Progenitors	HIST1H3G
DUSP6	0.257711	0.597	0.49	1.93e-57	Epicardial Progenitors	DUSP6
LMNA	0.363592	0.498	0.424	2.59e-57	Epicardial Progenitors	LMNA
PELO	0.257602	0.376	0.287	1.23e-56	Epicardial Progenitors	PELO
HIST1H1D1	0.457018	0.617	0.519	3.54e-56	Epicardial Progenitors	HIST1H1D
SGO2	0.395455	0.391	0.302	6.56e-56	Epicardial Progenitors	SGO2
HIST1H2AG	0.282987	0.323	0.226	9.05e-56	Epicardial Progenitors	HIST1H2AG
SPP1	0.404961	0.143	0.074	4.72e-54	Epicardial Progenitors	SPP1
PSAT11	0.38673	0.523	0.425	6.76e-54	Epicardial Progenitors	PSAT1
TUBB4B	0.540685	0.771	0.748	8.05e-54	Epicardial Progenitors	TUBB4B
NCAPD2	0.25786	0.409	0.319	1.58e-53	Epicardial Progenitors	NCAPD2
CCNB11	0.522388	0.5	0.408	6.32e-53	Epicardial Progenitors	CCNB1
ATAD51	0.250263	0.47	0.38	3.77e-52	Epicardial Progenitors	ATAD5
GLUL	0.26627	0.676	0.601	9.39e-51	Epicardial Progenitors	GLUL
USP1	0.264482	0.587	0.527	9.44e-51	Epicardial Progenitors	USP1
SERINC5	0.28101	0.496	0.415	2.15e-49	Epicardial Progenitors	SERINC5
RRAS	0.25607	0.423	0.342	3.82e-48	Epicardial Progenitors	RRAS
IGFBP7	0.892589	0.325	0.241	1.54e-47	Epicardial Progenitors	IGFBP7
UACA	0.283713	0.663	0.627	2.69e-46	Epicardial Progenitors	UACA
PLK1	0.297569	0.308	0.222	7.03e-46	Epicardial Progenitors	PLK1
DBF4	0.27826	0.534	0.462	2.95e-45	Epicardial Progenitors	DBF4
CCNE1	0.259713	0.266	0.19	1.83e-44	Epicardial Progenitors	CCNE1
SYDE2	0.265524	0.421	0.339	5e-44	Epicardial Progenitors	SYDE2
DSP	0.266208	0.954	0.946	5.63e-44	Epicardial Progenitors	DSP
CDC201	0.418751	0.391	0.31	4.18e-43	Epicardial Progenitors	CDC20
FLNB	0.252512	0.48	0.411	1.83e-41	Epicardial Progenitors	FLNB
DDIT3	0.285514	0.33	0.246	3.76e-41	Epicardial Progenitors	DDIT3
CCND2	0.290559	0.859	0.828	5.67e-40	Epicardial Progenitors	CCND2
PRSS23	0.405863	0.322	0.246	2.04e-38	Epicardial Progenitors	PRSS23
RAI14	0.30329	0.531	0.494	1.02e-36	Epicardial Progenitors	RAI14
PPP1R14A	0.307465	0.439	0.383	2.37e-35	Epicardial Progenitors	PPP1R14A
TACC31	0.268937	0.381	0.31	1.33e-31	Epicardial Progenitors	TACC3
ACAT2	0.255259	0.539	0.487	1.21e-28	Epicardial Progenitors	ACAT2
PDLIM3	0.400851	0.3	0.235	1.08e-26	Epicardial Progenitors	PDLIM3
THBS1	0.310107	0.209	0.148	5.28e-25	Epicardial Progenitors	THBS1
HIST1H1E1	0.359028	0.551	0.516	1.76e-23	Epicardial Progenitors	HIST1H1E
HIST2H2AC	0.296493	0.427	0.378	3.67e-23	Epicardial Progenitors	HIST2H2AC
ARG2	0.366958	0.335	0.289	1.7e-22	Epicardial Progenitors	ARG2
HIST1H1C	0.435713	0.545	0.513	1.39e-21	Epicardial Progenitors	HIST1H1C
MYL12A	0.255413	0.796	0.805	1.67e-19	Epicardial Progenitors	MYL12A
AURKA	0.266842	0.393	0.364	2.33e-11	Epicardial Progenitors	AURKA
H19	0.434848	0.242	0.32	2.83e-06	Epicardial Progenitors	H19
COL4A1	0.280347	0.644	0.684	0.0355473	Epicardial Progenitors	COL4A1
DDIT4	0.291649	0.582	0.676	1	Epicardial Progenitors	DDIT4
TTR	4.18927	0.765	0.011	0	Hepatic Endoderm	TTR
APOA1	3.1235	0.752	0.201	0	Hepatic Endoderm	APOA1
APOA2	2.92404	0.766	0.023	0	Hepatic Endoderm	APOA2
SERPINA1	2.82212	0.291	0.01	0	Hepatic Endoderm	SERPINA1
AFP	2.77503	0.229	0.019	0	Hepatic Endoderm	AFP
FN11	2.47101	0.987	0.61	0	Hepatic Endoderm	FN1
CKB	2.07272	0.967	0.79	0	Hepatic Endoderm	CKB
NPY	2.02451	0.511	0.149	0	Hepatic Endoderm	NPY
LINC00261	1.92136	0.878	0.065	0	Hepatic Endoderm	LINC00261
CD24	1.84405	0.992	0.758	0	Hepatic Endoderm	CD24
FGB	1.81634	0.213	0.007	0	Hepatic Endoderm	FGB
PCAT14	1.7894	0.788	0.093	0	Hepatic Endoderm	PCAT14
DLK1	1.77511	0.737	0.121	0	Hepatic Endoderm	DLK1
EPCAM1	1.74043	0.974	0.376	0	Hepatic Endoderm	EPCAM
ID1	1.6718	0.959	0.582	0	Hepatic Endoderm	ID1
VTN	1.61064	0.597	0.112	0	Hepatic Endoderm	VTN
HHEX	1.60622	0.709	0.091	0	Hepatic Endoderm	HHEX
PEG10	1.50915	0.902	0.738	0	Hepatic Endoderm	PEG10
KRT191	1.48226	0.996	0.889	0	Hepatic Endoderm	KRT19
APELA	1.47267	0.635	0.048	0	Hepatic Endoderm	APELA
APOC1	1.4581	0.876	0.474	0	Hepatic Endoderm	APOC1
LY6E	1.40947	0.929	0.654	0	Hepatic Endoderm	LY6E
SLC2A3	1.3964	0.949	0.799	0	Hepatic Endoderm	SLC2A3
TBX3	1.39005	0.78	0.237	0	Hepatic Endoderm	TBX3
APOB	1.38408	0.416	0.014	0	Hepatic Endoderm	APOB
GPC31	1.35141	0.815	0.415	0	Hepatic Endoderm	GPC3
APOE	1.23141	0.995	0.956	0	Hepatic Endoderm	APOE
WFDC2	1.20047	0.823	0.377	0	Hepatic Endoderm	WFDC2
HLA-B	1.19401	0.719	0.217	0	Hepatic Endoderm	HLA-B
FAM184A	1.18457	0.746	0.302	0	Hepatic Endoderm	FAM184A
FOXA21	1.18089	0.737	0.113	0	Hepatic Endoderm	FOXA2
TTC3	1.1712	0.952	0.765	0	Hepatic Endoderm	TTC3
ID4	1.08809	0.839	0.365	0	Hepatic Endoderm	ID4
CST3	1.06825	0.896	0.648	0	Hepatic Endoderm	CST3
CLDN3	1.02618	0.664	0.126	0	Hepatic Endoderm	CLDN3
RIPPLY3	0.995803	0.468	0.022	0	Hepatic Endoderm	RIPPLY3
GATA3	0.993181	0.607	0.141	0	Hepatic Endoderm	GATA3
AMBP	0.985502	0.274	0.007	0	Hepatic Endoderm	AMBP
FLRT3	0.972907	0.64	0.181	0	Hepatic Endoderm	FLRT3
RAB251	0.944371	0.736	0.197	0	Hepatic Endoderm	RAB25
COL4A6	0.920859	0.743	0.305	0	Hepatic Endoderm	COL4A6
ONECUT1	0.907731	0.366	0.1	0	Hepatic Endoderm	ONECUT1
DCDC2	0.901533	0.458	0.016	0	Hepatic Endoderm	DCDC2
MUSTN1	0.901378	0.405	0.016	0	Hepatic Endoderm	MUSTN1
SPINK1	0.89947	0.145	0.009	0	Hepatic Endoderm	SPINK1
ROBO2	0.878522	0.561	0.152	0	Hepatic Endoderm	ROBO2
CAMK2N1	0.872551	0.613	0.203	0	Hepatic Endoderm	CAMK2N1
CGN	0.869652	0.574	0.112	0	Hepatic Endoderm	CGN
GOLM1	0.824613	0.835	0.568	0	Hepatic Endoderm	GOLM1
LINC00348	0.793831	0.349	0.007	0	Hepatic Endoderm	LINC00348
EPSTI1	0.792193	0.502	0.136	0	Hepatic Endoderm	EPSTI1
ARSE	0.780876	0.613	0.144	0	Hepatic Endoderm	ARSE
CCKBR	0.779501	0.504	0.105	0	Hepatic Endoderm	CCKBR
ZFP36L2	0.768551	0.762	0.468	0	Hepatic Endoderm	ZFP36L2
PCBD1	0.76126	0.889	0.639	0	Hepatic Endoderm	PCBD1
CDH6	0.743017	0.231	0.032	0	Hepatic Endoderm	CDH6
S100A16	0.736238	0.622	0.25	0	Hepatic Endoderm	S100A16
PABPC11	0.735238	0.995	0.954	0	Hepatic Endoderm	PABPC1
HABP2	0.735194	0.352	0.008	0	Hepatic Endoderm	HABP2
MAL21	0.725895	0.591	0.169	0	Hepatic Endoderm	MAL2
S100A14	0.722181	0.233	0.011	0	Hepatic Endoderm	S100A14
MTTP	0.721528	0.342	0.009	0	Hepatic Endoderm	MTTP
SYTL5	0.720589	0.53	0.125	0	Hepatic Endoderm	SYTL5
FTL1	0.703133	0.996	0.985	0	Hepatic Endoderm	FTL
FRMD4A	0.686287	0.514	0.163	0	Hepatic Endoderm	FRMD4A
PPFIBP2	0.686076	0.48	0.076	0	Hepatic Endoderm	PPFIBP2
ONECUT2	0.668716	0.173	0.021	0	Hepatic Endoderm	ONECUT2
ADAMTS19	0.667904	0.538	0.194	0	Hepatic Endoderm	ADAMTS19
ERRFI1	0.665557	0.515	0.168	0	Hepatic Endoderm	ERRFI1
FOXA3	0.661469	0.495	0.091	0	Hepatic Endoderm	FOXA3
SH3YL1	0.659099	0.552	0.193	0	Hepatic Endoderm	SH3YL1
CDH12	0.641229	0.654	0.234	0	Hepatic Endoderm	CDH1
APOM	0.639471	0.363	0.051	0	Hepatic Endoderm	APOM
F10	0.639191	0.411	0.057	0	Hepatic Endoderm	F10
FOXA1	0.638685	0.427	0.01	0	Hepatic Endoderm	FOXA1
FZD5	0.636476	0.446	0.103	0	Hepatic Endoderm	FZD5
ALDH1A1	0.635068	0.2	0.009	0	Hepatic Endoderm	ALDH1A1
RAB3B	0.632231	0.654	0.301	0	Hepatic Endoderm	RAB3B
CST1	0.628355	0.254	0.04	0	Hepatic Endoderm	CST1
CLDN71	0.616347	0.638	0.216	0	Hepatic Endoderm	CLDN7
F2	0.615499	0.391	0.007	0	Hepatic Endoderm	F2
ADGRG6	0.615412	0.438	0.103	0	Hepatic Endoderm	ADGRG6
DENND2C	0.600857	0.41	0.078	0	Hepatic Endoderm	DENND2C
PCDH17	0.600434	0.397	0.099	0	Hepatic Endoderm	PCDH17
ITLN2	0.598946	0.321	0.047	0	Hepatic Endoderm	ITLN2
AMOT	0.591879	0.494	0.145	0	Hepatic Endoderm	AMOT
RPS17	0.573296	0.997	0.992	0	Hepatic Endoderm	RPS17
HPN	0.573048	0.453	0.074	0	Hepatic Endoderm	HPN
ZBTB16	0.569332	0.407	0.024	0	Hepatic Endoderm	ZBTB16
GSTA2	0.56721	0.313	0.007	0	Hepatic Endoderm	GSTA2
RBP4	0.566127	0.146	0.01	0	Hepatic Endoderm	RBP4
VIL1	0.562724	0.381	0.027	0	Hepatic Endoderm	VIL1
RPL13	0.558472	1	0.999	0	Hepatic Endoderm	RPL13
RPL6	0.557649	1	0.998	0	Hepatic Endoderm	RPL6
GRB14	0.548416	0.434	0.105	0	Hepatic Endoderm	GRB14
RPL11	0.548246	1	0.998	0	Hepatic Endoderm	RPL11
COL19A1	0.544276	0.347	0.013	0	Hepatic Endoderm	COL19A1
CMTM8	0.543818	0.468	0.137	0	Hepatic Endoderm	CMTM8
DUSP9	0.536926	0.317	0.028	0	Hepatic Endoderm	DUSP9
RPL37	0.530655	0.999	0.998	0	Hepatic Endoderm	RPL37
RPL31	0.520445	0.999	0.994	0	Hepatic Endoderm	RPL31
SMAGP	0.519768	0.444	0.107	0	Hepatic Endoderm	SMAGP
AP001528.1	0.516561	0.45	0.134	0	Hepatic Endoderm	AP001528.1
DNMBP	0.512821	0.456	0.147	0	Hepatic Endoderm	DNMBP
LYPD6B	0.50848	0.34	0.04	0	Hepatic Endoderm	LYPD6B
LGALS2	0.501723	0.243	0.008	0	Hepatic Endoderm	LGALS2
RPS19	0.495571	0.999	0.998	0	Hepatic Endoderm	RPS19
FGA	0.494375	0.175	0.004	0	Hepatic Endoderm	FGA
RPS21	0.488522	0.999	0.995	0	Hepatic Endoderm	RPS21
RPS8	0.486779	1	0.999	0	Hepatic Endoderm	RPS8
C5	0.484357	0.325	0.02	0	Hepatic Endoderm	C5
RPS61	0.483615	1	0.997	0	Hepatic Endoderm	RPS6
HMGCS2	0.483327	0.191	0.003	0	Hepatic Endoderm	HMGCS2
TOX3	0.477635	0.405	0.098	0	Hepatic Endoderm	TOX3
LINC02772	0.475743	0.303	0.059	0	Hepatic Endoderm	LINC02772
SPTLC3	0.469273	0.25	0.02	0	Hepatic Endoderm	SPTLC3
RPS14	0.465677	0.999	0.998	0	Hepatic Endoderm	RPS14
RPS3A	0.465589	1	0.998	0	Hepatic Endoderm	RPS3A
CLDN4	0.463643	0.29	0.051	0	Hepatic Endoderm	CLDN4
AC020656.2	0.460418	0.251	0.005	0	Hepatic Endoderm	AC020656.2
CRYM	0.455925	0.351	0.06	0	Hepatic Endoderm	CRYM
RPLP0	0.45261	0.999	0.996	0	Hepatic Endoderm	RPLP0
RPL36A	0.451463	0.999	0.996	0	Hepatic Endoderm	RPL36A
EXPH5	0.451005	0.36	0.09	0	Hepatic Endoderm	EXPH5
KIT	0.447112	0.369	0.098	0	Hepatic Endoderm	KIT
LINC02387	0.446191	0.315	0.036	0	Hepatic Endoderm	LINC02387
NOSTRIN	0.409333	0.267	0.029	0	Hepatic Endoderm	NOSTRIN
IHH	0.406277	0.282	0.007	0	Hepatic Endoderm	IHH
SOX17	0.403107	0.249	0.044	0	Hepatic Endoderm	SOX17
FGFR4	0.391731	0.324	0.059	0	Hepatic Endoderm	FGFR4
CXCR4	0.380344	0.276	0.047	0	Hepatic Endoderm	CXCR4
GSTA1	0.357229	0.157	0.014	0	Hepatic Endoderm	GSTA1
OVOL2	0.354496	0.262	0.035	0	Hepatic Endoderm	OVOL2
FOLR1	0.349488	0.28	0.052	0	Hepatic Endoderm	FOLR1
A1CF	0.342582	0.169	0.003	0	Hepatic Endoderm	A1CF
LINC02413	0.340178	0.209	0.006	0	Hepatic Endoderm	LINC02413
CYP4X1	0.33421	0.232	0.012	0	Hepatic Endoderm	CYP4X1
SERPINF2	0.334185	0.203	0.007	0	Hepatic Endoderm	SERPINF2
CELF4	0.33303	0.231	0.03	0	Hepatic Endoderm	CELF4
MAATS1	0.323221	0.248	0.02	0	Hepatic Endoderm	MAATS1
HNF1B	0.319501	0.236	0.012	0	Hepatic Endoderm	HNF1B
SLC39A5	0.296785	0.202	0.004	0	Hepatic Endoderm	SLC39A5
SLCO2A1	0.292488	0.24	0.028	0	Hepatic Endoderm	SLCO2A1
ENPP2	0.290753	0.222	0.026	0	Hepatic Endoderm	ENPP2
UNC13C	0.285096	0.183	0.015	0	Hepatic Endoderm	UNC13C
SERPINA5	0.275373	0.106	0.006	0	Hepatic Endoderm	SERPINA5
DOCK8	0.266821	0.204	0.018	0	Hepatic Endoderm	DOCK8
SPTSSB	0.264336	0.169	0.012	0	Hepatic Endoderm	SPTSSB
IGFBP31	0.771013	0.59	0.243	1.75e-300	Hepatic Endoderm	IGFBP3
CD302	0.3278	0.261	0.055	3.33e-300	Hepatic Endoderm	CD302
RPS27A1	0.429021	0.999	0.997	3.03e-296	Hepatic Endoderm	RPS27A
LAMB1	0.778354	0.787	0.501	3.88e-296	Hepatic Endoderm	LAMB1
RPL39	0.417905	1	0.998	6.13e-292	Hepatic Endoderm	RPL39
RPS11	0.510631	1	0.996	5.35e-289	Hepatic Endoderm	RPS11
TPM31	0.682104	0.981	0.868	3.56e-286	Hepatic Endoderm	TPM3
DUSP4	0.421571	0.35	0.098	9.07e-286	Hepatic Endoderm	DUSP4
AP1M21	0.466066	0.515	0.199	5.71e-285	Hepatic Endoderm	AP1M2
CLU	1.1139	0.694	0.412	3.74e-284	Hepatic Endoderm	CLU
RPS28	0.405832	1	0.998	7.3e-284	Hepatic Endoderm	RPS28
NRCAM	0.27299	0.192	0.03	8.51e-283	Hepatic Endoderm	NRCAM
RPL29	0.451719	0.998	0.997	3.65e-281	Hepatic Endoderm	RPL29
RPL7A	0.437086	1	0.997	5.49e-281	Hepatic Endoderm	RPL7A
RPS15A	0.426404	0.999	0.996	6.5e-281	Hepatic Endoderm	RPS15A
RPL37A	0.34339	1	0.999	1.73e-280	Hepatic Endoderm	RPL37A
RPS18	0.454181	1	0.998	1.22e-279	Hepatic Endoderm	RPS18
CNKSR2	0.379132	0.306	0.08	2.7e-276	Hepatic Endoderm	CNKSR2
RBM471	0.482727	0.481	0.184	3.16e-276	Hepatic Endoderm	RBM47
PRDX4	0.727923	0.9	0.76	6.9e-276	Hepatic Endoderm	PRDX4
RPL34	0.41229	1	0.998	1.17e-273	Hepatic Endoderm	RPL34
PLK21	0.593696	0.641	0.292	1.69e-273	Hepatic Endoderm	PLK2
ARHGAP18	0.393448	0.325	0.092	1.27e-271	Hepatic Endoderm	ARHGAP18
ESRP11	0.470177	0.515	0.214	1.28e-268	Hepatic Endoderm	ESRP1
C10orf82	0.334575	0.326	0.091	4.62e-266	Hepatic Endoderm	C10orf82
FZD4	0.462227	0.436	0.157	5.4e-266	Hepatic Endoderm	FZD4
RPL18	0.423662	0.999	0.997	1.46e-262	Hepatic Endoderm	RPL18
RPL26	0.412004	1	0.998	1.7e-262	Hepatic Endoderm	RPL26
RPS31	0.477043	0.999	0.996	2.88e-256	Hepatic Endoderm	RPS3
RPL23	0.515332	0.999	0.995	3.71e-255	Hepatic Endoderm	RPL23
RPL18A	0.424148	1	0.998	2.11e-254	Hepatic Endoderm	RPL18A
LIN28A1	0.661517	0.917	0.596	2.66e-254	Hepatic Endoderm	LIN28A
FGD6	0.701505	0.701	0.426	2.27e-253	Hepatic Endoderm	FGD6
SINHCAF1	0.616024	0.953	0.821	1.89e-252	Hepatic Endoderm	SINHCAF
IGFBP6	0.97084	0.46	0.194	1.91e-251	Hepatic Endoderm	IGFBP6
EXOC6	0.455518	0.436	0.17	2.65e-250	Hepatic Endoderm	EXOC6
RPL36	0.386137	0.999	0.998	1.18e-248	Hepatic Endoderm	RPL36
RPL14	0.409154	1	0.997	1.17e-245	Hepatic Endoderm	RPL14
TLE1	0.545528	0.604	0.29	8.67e-244	Hepatic Endoderm	TLE1
CHST9	0.459328	0.448	0.174	1.08e-242	Hepatic Endoderm	CHST9
CSPP1	0.629011	0.61	0.335	7.99e-241	Hepatic Endoderm	CSPP1
HES12	0.736878	0.705	0.421	2.87e-239	Hepatic Endoderm	HES1
ALCAM	0.558026	0.612	0.304	6.03e-239	Hepatic Endoderm	ALCAM
RPL9	0.36001	0.999	0.996	4.81e-238	Hepatic Endoderm	RPL9
RPL5	0.390079	1	0.998	1.31e-237	Hepatic Endoderm	RPL5
VEZT	0.614452	0.721	0.46	1.02e-236	Hepatic Endoderm	VEZT
RPL27A	0.449376	1	0.995	1.05e-233	Hepatic Endoderm	RPL27A
GLUL1	0.676158	0.818	0.596	7.46e-233	Hepatic Endoderm	GLUL
PRSS1	0.303056	0.164	0.026	3.64e-230	Hepatic Endoderm	PRSS1
FAM107B1	0.579655	0.656	0.37	1.84e-227	Hepatic Endoderm	FAM107B
EEF1B2	0.412117	0.994	0.987	2.96e-226	Hepatic Endoderm	EEF1B2
JADE1	0.733404	0.61	0.343	1.48e-225	Hepatic Endoderm	JADE1
RPS7	0.376713	0.999	0.996	2.01e-222	Hepatic Endoderm	RPS7
OCLN	0.384023	0.392	0.146	2.69e-221	Hepatic Endoderm	OCLN
LFNG	0.250813	0.198	0.041	1.71e-220	Hepatic Endoderm	LFNG
MYOF	0.471109	0.435	0.17	3.97e-219	Hepatic Endoderm	MYOF
RPL221	0.385841	1	0.996	4.78e-219	Hepatic Endoderm	RPL22
RPL35A	0.358351	1	0.997	6.69e-219	Hepatic Endoderm	RPL35A
SPINT11	0.440501	0.501	0.225	1.51e-218	Hepatic Endoderm	SPINT1
UGT3A1	0.255893	0.179	0.034	6.35e-216	Hepatic Endoderm	UGT3A1
ARHGAP24	0.355486	0.304	0.094	8.25e-213	Hepatic Endoderm	ARHGAP24
SMAD9	0.446363	0.525	0.243	1.85e-210	Hepatic Endoderm	SMAD9
RPL10A	0.348277	0.997	0.996	1e-208	Hepatic Endoderm	RPL10A
SPINT2	0.559694	0.901	0.751	4.16e-206	Hepatic Endoderm	SPINT2
DYNLT3	0.58568	0.516	0.252	7.2e-206	Hepatic Endoderm	DYNLT3
TMEM123	0.566972	0.838	0.679	2.77e-205	Hepatic Endoderm	TMEM123
ODC11	0.521127	0.863	0.68	3.21e-204	Hepatic Endoderm	ODC1
NIPSNAP1	0.563436	0.798	0.607	2.34e-203	Hepatic Endoderm	NIPSNAP1
FGFR1	0.822919	0.82	0.639	5.02e-200	Hepatic Endoderm	FGFR1
ELF3	0.275283	0.238	0.062	1.31e-199	Hepatic Endoderm	ELF3
TMEM1411	0.706853	0.945	0.868	1.37e-197	Hepatic Endoderm	TMEM141
DOK6	0.303145	0.318	0.103	3.05e-197	Hepatic Endoderm	DOK6
F11R1	0.510957	0.711	0.448	3.84e-195	Hepatic Endoderm	F11R
RPS16	0.361201	0.999	0.995	3.72e-193	Hepatic Endoderm	RPS16
ISL1	0.496208	0.453	0.194	7.22e-189	Hepatic Endoderm	ISL1
CCDC125	0.307205	0.312	0.108	5.93e-185	Hepatic Endoderm	CCDC125
RPL17	0.355099	1	0.997	5.54e-184	Hepatic Endoderm	RPL17
RPS24	0.337033	1	0.999	1.34e-183	Hepatic Endoderm	RPS24
RPS2	0.313568	1	0.999	1.81e-182	Hepatic Endoderm	RPS2
TPT1	0.281634	1	0.998	4.28e-181	Hepatic Endoderm	TPT1
RPL30	0.314337	0.996	0.996	1.39e-180	Hepatic Endoderm	RPL30
RPL32	0.3146	1	0.998	1.7e-179	Hepatic Endoderm	RPL32
NR2F2	0.3914	0.487	0.222	2.38e-177	Hepatic Endoderm	NR2F2
FREM2	0.410769	0.476	0.22	1.94e-176	Hepatic Endoderm	FREM2
RPLP2	0.282999	0.999	0.998	5.28e-176	Hepatic Endoderm	RPLP2
ID31	0.640038	0.919	0.804	1.77e-175	Hepatic Endoderm	ID3
RPL15	0.323121	0.999	0.997	1.91e-175	Hepatic Endoderm	RPL15
RPS23	0.307	0.999	0.998	4.11e-175	Hepatic Endoderm	RPS23
AGRN	0.34523	0.375	0.157	4.18e-175	Hepatic Endoderm	AGRN
PROM1	0.356517	0.379	0.154	4.82e-175	Hepatic Endoderm	PROM1
FNBP1L1	0.518665	0.808	0.579	1.11e-174	Hepatic Endoderm	FNBP1L
RPS15	0.328884	0.999	0.998	2.11e-172	Hepatic Endoderm	RPS15
FRY	0.349012	0.304	0.109	7.07e-172	Hepatic Endoderm	FRY
UGT3A2	0.366631	0.299	0.107	1.21e-170	Hepatic Endoderm	UGT3A2
COBL	0.298987	0.289	0.099	1.08e-169	Hepatic Endoderm	COBL
SYAP1	0.564741	0.766	0.602	1.1e-168	Hepatic Endoderm	SYAP1
ZNF765	0.377959	0.355	0.144	3.02e-168	Hepatic Endoderm	ZNF765
ATP2B11	0.451408	0.872	0.713	4.73e-168	Hepatic Endoderm	ATP2B1
B4GALT1	0.451805	0.512	0.276	7e-168	Hepatic Endoderm	B4GALT1
HELLS1	0.73671	0.819	0.588	1.51e-166	Hepatic Endoderm	HELLS
TMEM54	0.423241	0.442	0.211	1.21e-165	Hepatic Endoderm	TMEM54
BASP11	0.600414	0.816	0.606	5.69e-165	Hepatic Endoderm	BASP1
NACA	0.352363	0.998	0.996	3.19e-163	Hepatic Endoderm	NACA
EBPL	0.472044	0.74	0.539	7.12e-162	Hepatic Endoderm	EBPL
STARD10	0.41703	0.483	0.25	7.82e-162	Hepatic Endoderm	STARD10
TRIM71	0.473396	0.665	0.402	1.04e-161	Hepatic Endoderm	TRIM71
ABCA1	0.318492	0.386	0.158	5.02e-160	Hepatic Endoderm	ABCA1
HLA-C	0.484504	0.581	0.347	7.41e-158	Hepatic Endoderm	HLA-C
MARVELD3	0.31256	0.341	0.14	8.43e-157	Hepatic Endoderm	MARVELD3
ALDH21	0.50132	0.757	0.553	4.68e-155	Hepatic Endoderm	ALDH2
LAMA1	0.453278	0.673	0.433	2.81e-154	Hepatic Endoderm	LAMA1
MBP	0.256832	0.283	0.102	5.9e-154	Hepatic Endoderm	MBP
SALL41	0.420357	0.634	0.372	2.23e-153	Hepatic Endoderm	SALL4
GLDC	0.275876	0.311	0.119	2.28e-152	Hepatic Endoderm	GLDC
FTX	0.547745	0.737	0.544	3.01e-152	Hepatic Endoderm	FTX
MARCKSL11	0.458288	0.957	0.869	1.1e-150	Hepatic Endoderm	MARCKSL1
LLGL2	0.375186	0.504	0.275	1.38e-150	Hepatic Endoderm	LLGL2
RPSA1	0.341138	0.998	0.995	4.09e-150	Hepatic Endoderm	RPSA
RPL23A	0.313961	0.997	0.993	5.17e-150	Hepatic Endoderm	RPL23A
RPL33	0.318289	1	0.998	7.9e-149	Hepatic Endoderm	RPL3
COL9A2	0.323282	0.266	0.09	3.42e-148	Hepatic Endoderm	COL9A2
RPL351	0.279045	1	0.997	2.39e-145	Hepatic Endoderm	RPL35
CTSH	0.286343	0.307	0.121	3.96e-145	Hepatic Endoderm	CTSH
SHTN1	0.403728	0.47	0.252	9.9e-145	Hepatic Endoderm	SHTN1
MAP71	0.332894	0.45	0.222	1.92e-143	Hepatic Endoderm	MAP7
RPL19	0.292307	1	0.997	9.34e-143	Hepatic Endoderm	RPL19
ID21	0.612641	0.831	0.671	3.64e-142	Hepatic Endoderm	ID2
RPL21	0.264965	0.999	0.997	2.21e-141	Hepatic Endoderm	RPL21
HMGN11	0.377511	0.996	0.977	7.02e-141	Hepatic Endoderm	HMGN1
FAM126A	0.423962	0.538	0.32	8.83e-141	Hepatic Endoderm	FAM126A
KIAA1217	0.390372	0.416	0.204	2.08e-140	Hepatic Endoderm	KIAA1217
BCAM	0.367211	0.562	0.325	2.57e-140	Hepatic Endoderm	BCAM
PLPP3	0.338269	0.412	0.195	7.3e-140	Hepatic Endoderm	PLPP3
NEO1	0.412048	0.587	0.353	1.93e-139	Hepatic Endoderm	NEO1
CENPV1	0.477966	0.808	0.629	7.39e-139	Hepatic Endoderm	CENPV
COL4A5	0.401642	0.58	0.345	1.27e-137	Hepatic Endoderm	COL4A5
KDELR11	0.392276	0.959	0.93	2.07e-137	Hepatic Endoderm	KDELR1
B4GALT4	0.402955	0.493	0.28	8.12e-137	Hepatic Endoderm	B4GALT4
RPL13A	0.308683	1	0.999	9.71e-137	Hepatic Endoderm	RPL13A
ADD3	0.527101	0.734	0.56	1.65e-136	Hepatic Endoderm	ADD3
PIK3C2A	0.458468	0.761	0.592	2.97e-136	Hepatic Endoderm	PIK3C2A
SEMA3E	0.344247	0.311	0.126	7.95e-135	Hepatic Endoderm	SEMA3E
RPS4X	0.28707	0.999	0.995	7.03e-134	Hepatic Endoderm	RPS4X
PTPRF	0.446053	0.668	0.477	1.82e-133	Hepatic Endoderm	PTPRF
ARHGAP29	0.467479	0.64	0.411	2.57e-133	Hepatic Endoderm	ARHGAP29
MEG3	0.726328	0.317	0.134	2.48e-132	Hepatic Endoderm	MEG3
HES4	0.36386	0.5	0.27	2.74e-130	Hepatic Endoderm	HES4
BEX1	0.722373	0.749	0.588	9.24e-130	Hepatic Endoderm	BEX1
RPS121	0.280318	1	0.998	1.9e-129	Hepatic Endoderm	RPS12
VEGFA	0.410308	0.778	0.572	2.37e-129	Hepatic Endoderm	VEGFA
PRDX61	0.396148	0.977	0.966	1.17e-128	Hepatic Endoderm	PRDX6
RACK11	0.299548	0.998	0.996	2.07e-128	Hepatic Endoderm	RACK1
PGRMC2	0.483482	0.775	0.63	3.11e-128	Hepatic Endoderm	PGRMC2
DMKN1	0.408947	0.841	0.641	2.69e-127	Hepatic Endoderm	DMKN
RAB11FIP4	0.251859	0.298	0.122	8.94e-127	Hepatic Endoderm	RAB11FIP4
RPS25	0.274235	0.999	0.996	1.03e-126	Hepatic Endoderm	RPS25
RPS9	0.273912	0.997	0.996	1.72e-126	Hepatic Endoderm	RPS9
CD991	0.380892	0.958	0.876	3.67e-126	Hepatic Endoderm	CD99
SKA1	0.385868	0.362	0.177	1.69e-123	Hepatic Endoderm	SKA1
CLDN61	0.42846	0.826	0.595	1.79e-123	Hepatic Endoderm	CLDN6
UGDH	0.390246	0.553	0.352	6.3e-123	Hepatic Endoderm	UGDH
EEF1G	0.262068	0.998	0.993	9.54e-123	Hepatic Endoderm	EEF1G
ALPL1	0.331922	0.338	0.156	2.37e-122	Hepatic Endoderm	ALPL
SNHG29	0.350663	0.988	0.982	2.72e-122	Hepatic Endoderm	SNHG29
PTPN131	0.621765	0.726	0.569	1.55e-121	Hepatic Endoderm	PTPN13
ERBB3	0.269755	0.274	0.112	2.25e-121	Hepatic Endoderm	ERBB3
EPHX2	0.301028	0.293	0.122	3.77e-121	Hepatic Endoderm	EPHX2
RPS20	0.294589	0.998	0.994	4.35e-121	Hepatic Endoderm	RPS20
MXI1	0.549981	0.688	0.506	1.3e-120	Hepatic Endoderm	MXI1
MRPS26	0.484373	0.857	0.731	1.79e-120	Hepatic Endoderm	MRPS26
TLE5	0.437832	0.889	0.779	2.26e-120	Hepatic Endoderm	TLE5
RCN2	0.410861	0.867	0.759	3.75e-120	Hepatic Endoderm	RCN2
TMEFF1	0.421888	0.612	0.413	9.77e-119	Hepatic Endoderm	TMEFF1
ANXA21	0.461611	0.851	0.666	7.55e-118	Hepatic Endoderm	ANXA2
GAMT	0.434428	0.712	0.53	9.05e-117	Hepatic Endoderm	GAMT
TOMM20	0.368241	0.975	0.952	2.92e-116	Hepatic Endoderm	TOMM20
TMEM2581	0.350193	0.967	0.926	5.36e-116	Hepatic Endoderm	TMEM258
ZFAS11	0.370022	0.985	0.955	1e-115	Hepatic Endoderm	ZFAS1
FLRT21	0.500895	0.49	0.283	3.72e-115	Hepatic Endoderm	FLRT2
MOK	0.259163	0.413	0.201	1.08e-114	Hepatic Endoderm	MOK
RASSF7	0.275632	0.382	0.194	1.09e-113	Hepatic Endoderm	RASSF7
RPS5	0.284904	0.994	0.993	6.92e-112	Hepatic Endoderm	RPS5
MARVELD2	0.259497	0.31	0.141	1.41e-111	Hepatic Endoderm	MARVELD2
FARP1	0.437829	0.742	0.607	6.01e-111	Hepatic Endoderm	FARP1
BCL7A	0.385246	0.607	0.425	5.43e-110	Hepatic Endoderm	BCL7A
GTF2I	0.377436	0.96	0.916	6.2e-110	Hepatic Endoderm	GTF2I
PNN1	0.402688	0.947	0.871	1.22e-108	Hepatic Endoderm	PNN
CRLF1	0.290483	0.348	0.166	2.98e-108	Hepatic Endoderm	CRLF1
ERP291	0.37142	0.949	0.892	4.95e-108	Hepatic Endoderm	ERP29
RBM39	0.377892	0.951	0.899	1.09e-107	Hepatic Endoderm	RBM39
RPL28	0.258954	1	0.998	1.76e-107	Hepatic Endoderm	RPL28
TMED9	0.449224	0.896	0.829	1.95e-107	Hepatic Endoderm	TMED9
PRKAB2	0.373165	0.524	0.332	1.29e-106	Hepatic Endoderm	PRKAB2
HNF1A-AS1	0.271093	0.328	0.149	2.68e-106	Hepatic Endoderm	HNF1A-AS1
TULP4	0.413567	0.591	0.413	3.78e-106	Hepatic Endoderm	TULP4
SNHG71	0.480001	0.932	0.858	4.86e-106	Hepatic Endoderm	SNHG7
CYBA	0.450289	0.83	0.716	9.41e-105	Hepatic Endoderm	CYBA
CARHSP11	0.407057	0.87	0.729	2.12e-104	Hepatic Endoderm	CARHSP1
SLC37A4	0.269235	0.342	0.168	5.35e-104	Hepatic Endoderm	SLC37A4
HOOK2	0.333786	0.489	0.3	3.71e-103	Hepatic Endoderm	HOOK2
HNRNPA1	0.343962	0.996	0.98	1.68e-102	Hepatic Endoderm	HNRNPA1
FILIP1L1	0.489757	0.278	0.119	5.68e-102	Hepatic Endoderm	FILIP1L
RPS13	0.251567	0.998	0.994	9.85e-102	Hepatic Endoderm	RPS13
DNAJC11	0.359623	0.672	0.499	1.1e-101	Hepatic Endoderm	DNAJC1
LINC013561	0.494957	0.516	0.297	3.29e-101	Hepatic Endoderm	LINC01356
H3F3B1	0.340231	0.992	0.971	6.06e-100	Hepatic Endoderm	H3F3B
HSP90B11	0.378044	0.995	0.981	7.78e-100	Hepatic Endoderm	HSP90B1
MYCN	0.319839	0.404	0.22	1.16e-98	Hepatic Endoderm	MYCN
FIRRE	0.310153	0.428	0.242	1.36e-98	Hepatic Endoderm	FIRRE
PRXL2A	0.383843	0.855	0.78	2.04e-98	Hepatic Endoderm	PRXL2A
EFNA1	0.287768	0.362	0.184	2.23e-98	Hepatic Endoderm	EFNA1
SPATA7	0.306249	0.42	0.236	2.71e-98	Hepatic Endoderm	SPATA7
ARL6IP11	0.60807	0.827	0.692	2.76e-98	Hepatic Endoderm	ARL6IP1
STX3	0.348988	0.504	0.33	5.69e-97	Hepatic Endoderm	STX3
NUDT4	0.341393	0.657	0.466	6.54e-96	Hepatic Endoderm	NUDT4
MCC	0.370953	0.532	0.354	7.4e-95	Hepatic Endoderm	MCC
NEK2	0.37682	0.297	0.143	9.97e-95	Hepatic Endoderm	NEK2
RPGR	0.302562	0.358	0.19	1.66e-93	Hepatic Endoderm	RPGR
DSP1	0.398623	0.98	0.945	5.67e-93	Hepatic Endoderm	DSP
ECHDC2	0.250876	0.316	0.156	1.37e-92	Hepatic Endoderm	ECHDC2
NT5DC1	0.383189	0.628	0.466	2.95e-92	Hepatic Endoderm	NT5DC1
SAMD11	0.270355	0.398	0.209	3.39e-92	Hepatic Endoderm	SAMD11
C12orf75	0.323697	0.602	0.403	9.56e-91	Hepatic Endoderm	C12orf75
CXXC4	0.279646	0.39	0.21	2.29e-90	Hepatic Endoderm	CXXC4
SERPINE21	0.948996	0.727	0.562	2.44e-90	Hepatic Endoderm	SERPINE2
PATJ	0.305959	0.469	0.293	1e-89	Hepatic Endoderm	PATJ
TPD52L1	0.466344	0.34	0.187	4.47e-89	Hepatic Endoderm	TPD52L1
MFAP2	0.301832	0.655	0.466	9.43e-89	Hepatic Endoderm	MFAP2
PDIA61	0.328267	0.962	0.926	1.19e-88	Hepatic Endoderm	PDIA6
APPL1	0.373377	0.767	0.652	2.47e-88	Hepatic Endoderm	APPL1
MGST2	0.438223	0.54	0.378	4.06e-88	Hepatic Endoderm	MGST2
GAS51	0.414	0.97	0.931	1.91e-87	Hepatic Endoderm	GAS5
IFI161	0.499483	0.447	0.265	3.4e-87	Hepatic Endoderm	IFI16
SNRPE1	0.308903	0.951	0.877	3.94e-87	Hepatic Endoderm	SNRPE
PPDPF1	0.295585	0.951	0.904	5.63e-87	Hepatic Endoderm	PPDPF
AGL	0.403615	0.699	0.54	1.47e-86	Hepatic Endoderm	AGL
EIF4B	0.324724	0.963	0.93	1.53e-86	Hepatic Endoderm	EIF4B
CAPRIN2	0.355547	0.423	0.259	1.78e-86	Hepatic Endoderm	CAPRIN2
SERPINF1	0.321479	0.345	0.183	2.5e-86	Hepatic Endoderm	SERPINF1
SSBP3	0.350201	0.645	0.499	4.29e-86	Hepatic Endoderm	SSBP3
NEDD4L	0.33309	0.503	0.333	2.62e-85	Hepatic Endoderm	NEDD4L
TYRO3	0.277423	0.448	0.267	7.25e-85	Hepatic Endoderm	TYRO3
BRD71	0.335117	0.864	0.773	7.56e-84	Hepatic Endoderm	BRD7
SLC44A1	0.309653	0.497	0.32	1.02e-83	Hepatic Endoderm	SLC44A1
GDF15	0.502966	0.148	0.048	1.45e-83	Hepatic Endoderm	GDF15
HMGA11	0.313885	0.989	0.912	1.82e-83	Hepatic Endoderm	HMGA1
UTRN	0.421689	0.782	0.652	3.61e-83	Hepatic Endoderm	UTRN
DDAH2	0.356117	0.783	0.675	9e-83	Hepatic Endoderm	DDAH2
RAB4A	0.341506	0.726	0.603	2.43e-82	Hepatic Endoderm	RAB4A
YTHDC1	0.396617	0.852	0.765	7.84e-82	Hepatic Endoderm	YTHDC1
ZNF614	0.258361	0.283	0.142	3.74e-80	Hepatic Endoderm	ZNF614
TLN2	0.378804	0.63	0.471	4.4e-80	Hepatic Endoderm	TLN2
SRRM11	0.299975	0.967	0.929	1.33e-79	Hepatic Endoderm	SRRM1
CASD1	0.296188	0.478	0.307	1.37e-79	Hepatic Endoderm	CASD1
FRAT2	0.263192	0.372	0.215	4.94e-79	Hepatic Endoderm	FRAT2
PSAP	0.348951	0.889	0.826	1.2e-77	Hepatic Endoderm	PSAP
LSR1	0.280085	0.47	0.306	1.08e-76	Hepatic Endoderm	LSR
GJA11	0.363313	0.793	0.617	2.09e-76	Hepatic Endoderm	GJA1
GNPNAT11	0.324599	0.555	0.396	1.44e-75	Hepatic Endoderm	GNPNAT1
AGO11	0.346885	0.537	0.383	3.16e-75	Hepatic Endoderm	AGO1
TAF1D1	0.337343	0.873	0.773	4.16e-75	Hepatic Endoderm	TAF1D
[truncated: 7,167 more rows]
