# Supplementary material for: Combined lineage tracing and scRNA-seq reveals unexpected first heart field predominance of human iPSC differentiation
Source: eLife. 2023 Jun 7;12:e80075. doi: 10.7554/eLife.80075 (PMC10348749; doi:10.7554/eLife.80075)
Supplement: Figure 4—source data 3. [file elife-80075-fig4-data3.xlsx]

## Sheet: Table 6
gene	zscore	H_statistic	H_pvalue	S2S1_pvalue	S3S5_pvalue	S3S4_pvalue	S1S0_pvalue
LINC00348	1.73205	6097.94	0	0	0	0	1
SCGB1A1	1.73205	1924.84	0	0	0	0	1
IHH	1.73205	5575.65	0	0	0	0	1
SMLR1	1.73205	1885.63	0	0	0	0	1
F2	1.73205	6592.82	0	0	0	0	1
DCN	1.73204	2767.57	0	0	1	0	2.29219e-266
HNF4A	1.73204	3271.99	0	0	0	0	1
RFX6	1.73204	1712.32	0	5.23361e-291	0	0	1
LINC02413	1.73204	3731.34	0	0	0	0	1
FOXA1	1.73204	7914.31	0	0	0	0	1
SLC39A5	1.73204	3560.26	0	0	0	0	1
AKR1D1	1.73204	1806.92	0	8.20907e-307	0	0	1
HABP2	1.73204	6339.18	0	0	0	0	1
APOA2	1.73204	14239.2	0	0	0	0	1
TTR	1.73203	14461.2	0	0	0	0	1
MUSTN1	1.73203	6336.76	0	0	0	0	1
MYL2	1.73203	5222.44	0	0	0	1	0
FOXD3-AS1	1.73203	13832.6	0	1	0	0	0
DKK4	1.73203	4111.1	0	1	0	0	0
LNCPRESS1	1.73202	8674.95	0	1	0	0	0
TRDN-AS1	1.73202	2535.9	0	0	0	1	3.13631e-238
AC020656.2	1.73202	4496.45	0	0	0	0	1
HHATL	1.73202	1448.92	0	4.62305e-202	2.19161e-240	1	5.2433e-134
HMGCS2	1.73202	3010.3	0	0	0	0	1
CBR3	1.732	3219.85	0	1	0	0	0
FGA	1.732	2918.15	0	0	0	0	1
COL19A1	1.73199	6825.63	0	0	0	0	1
LINC00678	1.73199	16284.3	0	1	0	0	0
AC064802.1	1.73198	9298.06	0	1	0	0	0
CAPN9	1.73198	1748.43	0	1.21942e-290	0	0	1
TCAP	1.73198	13018.4	0	0	0	1	0
APOB	1.73198	6471.55	0	0	0	0	1
ITGA8	1.73197	5615.1	0	0	1	0	0
VIL1	1.73197	4892.73	0	0	0	0	1
CKM	1.73196	14319.5	0	0	0	1	0
BANCR	1.73196	2866.13	0	0	0	1	8.93488e-284
PCSK1	1.73196	5671.28	0	1	0	0	0
ASGR2	1.73196	1687.14	0	1.6793e-291	0	0	1
FGFBP3	1.73196	3928.71	0	1	0	0	0
NEFM	1.73195	12019.2	0	1	0	0	0
LGALS2	1.73195	4334.46	0	0	0	0	1
FGB	1.73195	2969.99	0	0	0	0	1
TEK	1.73194	2140.88	0	5.0958e-294	1	0	3.02664e-205
GSTA2	1.73194	5175.83	0	0	0	0	1
TNNI3	1.73194	12625.5	0	0	0	1	0
FBN1	1.73194	5841.24	0	0	1	0	0
PLA2G12B	1.73193	2307.75	0	0	0	0	1
MYH7	1.73193	12438.8	0	0	0	1	0
AC009446.1	1.73192	19492.5	0	1	0	0	0
UTF1	1.73191	11449.3	0	1	0	0	0
COX6A2	1.73191	9366.28	0	0	0	1	0
MT1H	1.7319	3648.01	0	1	0	0	0
FBXL22	1.73189	5713.89	0	0	0	1	0
AMBP	1.73189	3906.23	0	0	0	0	1
MTTP	1.73188	5523.06	0	0	0	0	1
AL117378.1	1.73187	10576.2	0	1	0	0	0
SERPINF2	1.73185	2767.02	0	0	0	0	1
AL591742.2	1.73184	8257.33	0	1	0	0	0
PDE4DIP	1.73184	9114.64	0	0	0	1	0
MIXL1	1.73183	7408.05	0	1	0	0	0
A1CF	1.73181	2433.66	0	0	0	0	1
NANOG	1.7318	14435.4	0	1	0	0	0
APOM	1.73179	2636.1	0	0	0	0	1
LUM	1.73178	6929.91	0	0	1	0	0
CYP2J2	1.73178	1815.88	0	9.85176e-260	6.37465e-300	1	2.98792e-170
C1orf105	1.73177	2995.36	0	0	0	1	1.03608e-281
SMOC2	1.73177	3351.02	0	0	1	0	0
AC007218.1	1.73177	1696.22	0	1	3.67365e-290	1.06778e-304	3.63372e-170
DCDC2	1.73176	6829.38	0	0	0	0	1
AFP	1.73175	1714.15	0	2.06472e-296	0	0	1
LMOD2	1.73174	9658.02	0	0	0	1	0
LRRC10	1.73171	4836.71	0	0	0	1	0
TRIM63	1.7317	8706.32	0	0	0	1	0
HSPB3	1.7317	8553.8	0	0	0	1	0
FSD2	1.7317	8391.58	0	0	0	1	0
AL353747.4	1.73169	11304	0	1	0	0	0
PDZK1	1.73168	1770.91	0	2.67809e-283	0	0	1
RSPO1	1.73168	1814.18	0	6.54848e-256	1	0	5.48981e-160
FOXB1	1.73168	5835.66	0	1	0	0	0
LHX2	1.73167	2944.41	0	0	1	0	7.87356e-294
MT1G	1.73167	4976.13	0	1	0	0	0
TCF21	1.73165	3979.96	0	0	1	0	0
S100A14	1.73163	3829.9	0	0	0	0	1
MYH7B	1.73162	7007.31	0	0	0	1	0
MIR503HG	1.73156	3416.96	0	0	1	0	0
FGF4	1.73156	6181.43	0	1	0	0	0
LAMA4	1.73156	8161.26	0	0	0	1	0
ESRG	1.73154	19148.6	0	1	0	0	0
CCN4	1.73153	2151.85	0	0	1	0	1.71603e-205
COL6A3	1.73153	5339.46	0	0	1	0	0
ADPRHL1	1.73152	10168.6	0	0	0	1	0
AL591030.1	1.73151	5459.27	0	1	0	0	0
SCGB3A2	1.73151	12615.2	0	1	0	0	0
MYL3	1.73149	18255.9	0	0	0	1	0
CSRP3	1.73149	17029.7	0	0	0	1	0
CRYAB	1.73149	14981.6	0	0	0	1	0
HSPB2	1.73148	8089.85	0	0	0	1	0
POLR3G	1.73146	9489.56	0	1	0	0	0
PDGFRB	1.73145	4192.79	0	0	1	0	0
SERPINA1	1.73145	3475.99	0	0	0	0	1
ASB2	1.73142	9146.05	0	0	0	1	0
COL8A1	1.73138	1904.1	0	4.92845e-279	1	0	1.90856e-188
TBXT	1.73136	6320.08	0	1	0	0	0
FRMD3	1.73136	7671.9	0	0	0	1	0
FGF19	1.73135	6032.07	0	1	0	0	0
MYBPC3	1.73135	16466.8	0	0	0	1	0
MYH10	1.73135	5979.03	0	0	1	0	0
PLAT	1.73129	5362.69	0	0	1	0	0
LZTS1	1.73124	2678.58	0	1	0	0	7.1341e-290
PGAM2	1.7312	9705.94	0	0	0	1	0
LRRC49	1.7312	2755.91	0	0	0	1	5.93728e-274
GPAT3	1.73119	2585.53	0	0	0	1	3.91732e-255
KLHL31	1.73117	5455.08	0	0	0	1	0
CFI	1.73115	1965.46	0	1.63476e-296	1	0	2.99834e-191
LAMA2	1.73112	7838.9	0	0	0	1	0
EMC10	1.73111	14470.4	0	0	0	1	0
SPHKAP	1.73111	3210.09	0	0	0	1	0
TBX3	1.7311	5443.61	0	0	0	0	1
LEFTY1	1.7311	3569.99	0	1	0	0	0
C5	1.73107	3999.78	0	0	0	0	1
CLIC5	1.73106	4320.51	0	0	0	1	0
AHNAK2	1.73106	5965.02	0	0	0	1	0
APOBEC2	1.73105	12179.4	0	0	0	1	0
TXLNB	1.73105	3565.32	0	0	0	1	0
TUBB2A	1.73103	9363.49	0	1	0	0	0
ADAM12	1.73101	1874.48	0	2.6373e-263	1	0	2.11396e-165
BNC1	1.73099	3975.69	0	0	1	0	0
GNG2	1.73097	4327.61	0	0	1	0	0
AC018464.1	1.73094	1741.94	0	3.78031e-254	6.83867e-282	1	1.97099e-163
SOX2	1.73091	13707.9	0	1	0	0	0
RCAN2	1.7309	6838.46	0	0	0	1	0
NPPA	1.73089	13951.2	0	0	0	1	0
CKMT2	1.73087	4806	0	0	0	1	0
RIPPLY3	1.73085	7501.93	0	0	0	0	1
ALDH1A1	1.73085	2025.96	0	0	0	0	1
ITGB1BP2	1.73084	7028.29	0	0	0	1	0
AFAP1L2	1.73081	3165.74	0	0	1	0	0
APELA	1.73081	8140.83	0	0	0	0	1
MGST1	1.7308	4860.04	0	1	0	0	0
NAV2-AS2	1.73072	2222.54	0	0	0	1	4.89981e-213
MLIP	1.73065	5043.06	0	0	0	1	0
LDB3	1.7306	16235.6	0	0	0	1	0
SNAI2	1.7306	3829.25	0	0	1	0	0
CBR1	1.73055	10854.2	0	1	0	0	0
MB	1.73045	11947.9	0	0	0	1	0
GSC	1.73045	6914.13	0	1	0	0	0
MIAT	1.73044	4418.08	0	1	0	0	0
SPINK1	1.7304	1498.82	0	4.00627e-195	4.78289e-298	4.64255e-290	1
DDR2	1.73038	4280.95	0	0	1	0	0
MOBP	1.73037	1944.3	0	6.16214e-302	0	0	1
CNMD	1.73032	9305.01	0	1	0	0	0
SFRP2	1.73024	16829.4	0	1	0	0	0
AL136171.2	1.73016	8113.44	0	0	0	1	0
WT1	1.73014	4693.53	0	0	1	0	0
FITM1	1.73013	12721.5	0	0	0	1	0
SMYD1	1.73008	15273	0	0	0	1	0
RBP4	1.73005	1711.75	0	1.6776e-232	0	0	1
MYOM1	1.73003	15778.5	0	0	0	1	0
SLC25A23	1.72995	2414.6	0	1.74076e-271	0	1	4.95989e-235
PPP2R2B	1.72988	4318.44	0	1	0	0	0
PGM5	1.72985	6199.43	0	0	0	1	0
PCAT14	1.72983	11766	0	0	0	0	1
HPX	1.72979	1487.14	0	8.12695e-274	3.47965e-268	5.33748e-272	1
PPP1R14C	1.72978	13316.7	0	0	0	1	0
ACTA1	1.72975	5569.14	0	0	0	1	0
KLHL41	1.72974	7668.49	0	0	0	1	0
GJA3	1.72972	4913.72	0	0	0	1	0
CCDC81	1.72969	1487.46	0	3.24604e-271	6.22355e-265	7.04467e-278	1
HSF1	1.72965	2900.55	0	0	0	1	7.33604e-303
PPP1R16A	1.72961	5293.15	0	0	0	1	0
LINC02700	1.72961	3872.37	0	1	0	0	0
TBX18	1.72958	3734.43	0	0	1	0	0
CXCL14	1.72955	2664.07	0	0	1	0	7.0038e-298
COL6A6	1.72949	2295.23	0	0	1	0	2.30484e-220
CCKBR	1.72945	6431.37	0	0	0	0	1
COL1A2	1.72939	11059.5	0	0	1	0	0
MYO18B	1.7293	9563.08	0	0	0	1	0
LINC00881	1.72929	8979.49	0	0	0	1	0
MYZAP	1.72929	5204.77	0	0	0	1	0
TESC	1.72927	1786.16	0	3.08228e-183	0	1	2.65587e-161
COL3A1	1.7292	16386.8	0	0	1	0	0
FABP3	1.72918	12620.6	0	0	0	1	0
FAM78A	1.72916	6090.39	0	0	0	1	0
CDA	1.72912	12660.7	0	1	0	0	0
ACTN2	1.72908	16448.9	0	0	0	1	0
AC020909.2	1.72904	18831.6	0	0	0	1	0
MYH6	1.72901	17078	0	0	0	1	0
GBP4	1.72899	2976.3	0	0	1	0	5.49211e-295
TMEM132B	1.72892	4526.67	0	1	0	0	0
MIR133A1HG	1.72883	5037.61	0	0	0	1	0
TRIML2	1.72875	5500.7	0	1	0	0	0
IGFBPL1	1.72865	4418.18	0	1	0	0	0
POU3F1	1.72859	3316.45	0	1	0	0	0
HRC	1.72853	13031.8	0	0	0	1	0
AC005062.1	1.72848	8989.68	0	1	0	0	0
LINC00261	1.72844	15752.5	0	0	0	0	1
LINC00545	1.72842	2417.11	0	1	0	0	8.00732e-236
TGFBI	1.72837	3371.48	0	0	1	0	4.98438e-284
HSPB7	1.72836	16317.6	0	0	0	1	0
CORIN	1.7283	7627.57	0	0	0	1	0
SH3BGR	1.72817	9091.33	0	0	0	1	0
VASH2	1.72815	8026.08	0	1	0	0	0
SULF1	1.72813	1890.78	0	4.37025e-209	1	0	1.44322e-180
IQGAP2	1.72813	7713.72	0	1	0	0	0
PHC1	1.72809	4926.7	0	1	0	0	0
DUSP9	1.72799	2947.49	0	0	0	0	1
IL1R1	1.72791	1570.95	0	1.10274e-239	1	3.52198e-257	1.78234e-132
HOXB6	1.72784	2782.22	0	0	1	0	2.25877e-234
SMPX	1.72783	16784.4	0	0	0	1	0
EEF1A2	1.7277	10561.1	0	0	0	1	0
LRRTM1	1.72765	1900.61	0	1.1921e-268	1	1.99476e-305	7.49981e-204
VCAM1	1.72757	6557.51	0	0	0	1	0
DUSP27	1.72754	5510.66	0	0	0	1	0
CCDC3	1.72751	5917.69	0	0	1	0	0
CPED1	1.72749	2513.56	0	0	1	0	4.50705e-250
GRID2	1.72748	11590.4	0	1	0	0	0
RGS4	1.72744	3077.88	0	0	1	0	2.33938e-308
CASZ1	1.72742	6466.01	0	0	0	1	0
ZBTB16	1.72739	5258.49	0	0	0	0	1
PPP1R12B	1.72731	11321.8	0	0	0	1	0
LYPD6B	1.72716	3150.2	0	0	0	0	1
POPDC3	1.72713	8179.75	0	0	0	1	0
ACOT11	1.72689	3519.01	0	0	0	1	0
EMILIN1	1.72684	2005.9	0	4.28993e-286	1	0	9.63933e-218
AC006329.1	1.72681	6813.23	0	1	0	0	0
SCG3	1.72672	15432	0	1	0	0	0
CDKN2B	1.72664	1568.19	0	3.03165e-238	1	2.4727e-259	1.70058e-129
AKAP6	1.72659	5052.12	0	0	0	1	0
CER1	1.72655	4765.79	0	1	0	0	0
TMEM38A	1.72637	5059.94	0	0	0	1	0
SPARC	1.72632	9732.08	0	0	1	0	0
SYT1	1.72617	7234.92	0	1	0	0	0
SYNPO2L	1.72612	12081.9	0	0	0	1	0
ENO3	1.7261	16780.7	0	0	0	1	0
FHL2	1.72608	5756.98	0	0	0	1	0
MYH11	1.72602	1794.22	0	7.97715e-273	1.9982e-272	1	9.83008e-179
MT1F	1.72596	5311.43	0	1	0	0	0
NAV1	1.72589	6241.96	0	0	0	1	0
VGF	1.72584	1567.67	0	1	6.41025e-247	4.91966e-294	5.40131e-163
SFN	1.72563	1950.67	0	1	0	0	1.103e-183
CALD1	1.72553	6976.8	0	0	1	0	0
MLF1	1.72546	4200.68	0	0	0	1	0
NODAL	1.72536	11526.2	0	1	0	0	0
SPTLC3	1.72536	2277.36	0	0	0	0	1
CTNNA3	1.72529	8956.69	0	0	0	1	0
XIRP1	1.72527	11930.4	0	0	0	1	0
MEST	1.72523	6679.5	0	0	1	0	0
HRH2	1.72507	5193.99	0	0	0	1	0
NCCRP1	1.72499	2647.81	0	0	1	0	6.34918e-263
MMP9	1.72496	1528.49	0	1	6.04392e-256	5.83065e-283	1.49956e-141
POU5F1	1.72496	18016.9	0	1	0	0	0
TNNC1	1.72495	18704	0	0	0	1	0
HSP90AA1	1.72494	4464.22	0	1	0	0	0
SORBS2	1.72494	13866.5	0	0	0	1	0
LRRC32	1.7248	2661.58	0	0	1	0	9.5857e-255
PDPN	1.7246	2199	0	1	0	0	2.77804e-213
RRAD	1.72457	9331.12	0	0	0	1	0
POPDC2	1.72455	12502.4	0	0	0	1	0
CDX1	1.72449	2432.91	0	1	0	0	1.11348e-262
UNC45B	1.72415	12695.9	0	0	0	1	0
ITGA1	1.724	3974.09	0	0	1	0	0
SOX6	1.72398	4844.61	0	0	1	0	0
PDGFD	1.72396	2879.55	0	0	0	1	1.9065e-295
GAL	1.7239	17736	0	1	0	0	0
PAPPA	1.72379	3819.29	0	0	1	0	0
PLXNA2	1.72372	3200.85	0	0	1	0	0
GABRB3	1.72365	9373.86	0	1	0	0	0
ILDR2	1.72351	3017.24	0	0	0	1	0
PLN	1.72339	15433.1	0	0	0	1	0
BVES	1.72326	9917.3	0	0	0	1	0
COL9A2	1.72282	3346.28	0	0	0	0	1
SLCO3A1	1.72265	5811.61	0	0	0	1	0
HMGA2	1.7226	2154.66	0	0	1	0	1.0608e-236
SYT10	1.72231	3712.12	0	0	1	0	0
HAPLN1	1.72229	3304.34	0	0	1	0	0
TM4SF1	1.72218	2650.63	0	0	1	0	1.44972e-217
MT1X	1.72209	6670.65	0	1	0	0	0
BST2	1.72192	4860.12	0	0	1	0	0
CREB3L1	1.72176	1861.43	0	3.57718e-305	1	3.52643e-268	4.24524e-183
KCNMA1	1.72162	2862.09	0	7.19905e-279	1	0	1.77882e-258
CLDN10	1.7216	5813.72	0	1	0	0	0
SCUBE3	1.7214	4230.96	0	0	0	1	0
NEFL	1.7214	10104.6	0	1	0	0	0
S100A4	1.72127	1708.92	0	7.14729e-187	2.29634e-286	1	2.63046e-208
HES6	1.72126	6336.71	0	1	0	0	0
FAM184A	1.72116	5335.21	0	0	0	0	1
G0S2	1.72114	2398.3	0	0	0	1	6.08015e-251
MTUS2	1.72097	8985.46	0	0	0	1	0
PTGES3L	1.72073	5521.65	0	0	0	1	0
MYOZ2	1.72051	12284.5	0	0	0	1	0
FMOD	1.72049	2941.01	0	0	1	0	9.61265e-214
MYO18A	1.72008	3673.23	0	0	0	1	0
NKX2-5	1.72	15266.1	0	0	0	1	0
TMEM176B	1.71999	1694.36	0	6.33204e-270	4.13793e-239	1	8.01693e-172
PRKAG2	1.71998	7299.27	0	0	0	1	0
ARID5B	1.7199	3232.63	0	0	1	0	0
INPP4B	1.71984	2990.38	0	0	0	1	0
TRIM55	1.71976	13421.1	0	0	0	1	0
UNC5C	1.71975	2285	0	0	1	0	9.28149e-261
AL451069.1	1.71957	7735.74	0	0	0	1	0
SYT6	1.71956	6889.89	0	1	0	0	0
TRDN	1.71928	11712.2	0	0	0	1	0
CXCR4	1.71921	2886.59	0	0	0	0	1
PPP1R1A	1.71912	8487.4	0	0	0	1	0
F10	1.71893	3834.13	0	0	0	0	1
PLP2	1.71887	3819.51	0	0	0	1	0
PTPRZ1	1.71844	13564.1	0	1	0	0	0
KIRREL1	1.71838	1833.16	0	2.04789e-287	1	1.74372e-245	8.2158e-215
CD9	1.71825	14649.5	0	1	0	0	0
ANGPT1	1.71815	1879.78	0	4.41232e-260	6.95627e-287	1	1.15092e-216
EFNB1	1.71811	1443.53	0	2.34353e-210	1	3.66808e-195	5.68497e-179
DSC3	1.71804	3566.64	0	0	1	0	0
UNC5B-AS1	1.71785	3535.24	0	0	0	1	0
ATP2A2	1.71747	11598.6	0	0	0	1	0
FHOD3	1.71743	11155.9	0	0	0	1	0
SEPHS1	1.71741	10030.1	0	1	0	0	0
SNTA1	1.71713	11981.3	0	0	0	1	0
DNMT3B	1.71684	12256.1	0	1	0	0	0
MYL4	1.71684	19115.7	0	0	0	1	0
PCDH18	1.71681	3714.04	0	0	1	0	5.10109e-304
RAMP2	1.71649	1703.21	0	1.91553e-111	1	0	2.6794e-164
PTGIS	1.71633	3645.96	0	0	1	0	1.17524e-296
IDH3A	1.71617	4485.19	0	0	0	1	0
GLIPR2	1.71584	4792.85	0	0	1	0	0
PPM1K	1.7158	3755.97	0	0	0	1	0
C9orf135	1.71569	4680.67	0	1	0	0	0
KIF1A	1.71567	8910.71	0	1	0	0	0
ARHGDIB	1.71555	1907.77	0	0	1	6.90473e-238	3.59769e-186
HHEX	1.71519	7230.57	0	0	0	0	1
SLC28A3	1.71501	1503.03	0	1.81574e-238	6.21944e-209	1	9.21981e-154
GP1BB	1.71485	5481.24	0	0	0	1	0
IRX4	1.71483	5730.65	0	0	0	1	0
APOA1	1.71464	6236.18	0	0	0	0	1
A2M	1.71463	2532.56	0	0	0	1	6.13852e-266
GOT1	1.71445	6489.07	0	0	0	1	0
CDH11	1.71429	3986.16	0	0	1	0	0
STBD1	1.71424	4345.51	0	0	0	1	0
EGLN3	1.71422	2957.68	0	0	0	1	0
CACNA1C	1.71409	5855.19	0	0	0	1	0
TGFBR3	1.71397	2881.6	0	0	1	0	2.63773e-175
RYR2	1.71388	13041.7	0	0	0	1	0
EPB41L3	1.71365	3131.26	0	0	0	1	0
AL512358.2	1.71364	2331.73	0	1	0	0	1.10715e-203
AC092490.1	1.71339	8698.4	0	1	0	0	0
SOX17	1.71333	4514.57	0	0	0	0	1
EIF1B	1.7133	5995.03	0	0	0	1	0
DPPA4	1.7133	15561.6	0	1	0	0	0
CHSY1	1.71236	1506.92	0	2.40447e-180	1	5.32073e-224	2.1493e-204
TUBB2B	1.71213	12756.1	0	1	0	0	0
MAP3K20	1.71213	6792.36	0	0	0	1	0
EDN1	1.71209	1834.08	0	0	1	6.6667e-215	3.86904e-162
ITLN2	1.71196	3985.35	0	0	0	0	1
ETS1	1.71153	4708.06	0	0	1	0	0
NPY	1.71153	2748.18	0	0	0	0	1
IGF2	1.71137	12513.4	0	0	1	0	0
CRIP1	1.7113	8836.41	0	0	0	1	0
CDH6	1.71119	1490.66	0	1.28678e-224	5.33072e-151	0	1
ANXA1	1.71077	3755.05	0	0	1	0	0
AUXG01000058.1	1.71047	2467.43	0	0	1	0	9.96551e-256
AC104257.1	1.71039	5077.27	0	1	0	0	0
TGM2	1.71028	10351.1	0	0	0	1	0
ETV4	1.71026	10948.7	0	1	0	0	0
LIMS2	1.70999	6172.02	0	0	0	1	0
LSAMP	1.70996	3919.82	0	0	1	0	8.73938e-276
CPNE5	1.70986	1760.31	0	1.97433e-277	4.13075e-245	1	3.58535e-187
MPC1	1.70974	4954.98	0	0	0	1	0
PMAIP1	1.70925	13585.9	0	1	0	0	0
PCGF5	1.70868	4148.95	0	0	0	1	0
ADGRA2	1.70867	3750.02	0	0	1	0	0
RNF207	1.70848	7634.38	0	0	0	1	0
AFAP1L1	1.70845	4690.03	0	0	0	1	0
MYOCD	1.70839	13796.3	0	0	0	1	0
MDN1	1.70834	7370.3	0	1	0	0	0
ABLIM1	1.70799	5971.47	0	0	0	1	0
SLC8A1	1.70791	16464.6	0	0	0	1	0
SYNPO2	1.70737	4125.28	0	0	0	1	0
DKK1	1.70736	2570.66	0	1	4.96341e-306	0	5.91921e-164
ZIC2	1.70736	13995	0	1	0	0	0
SYNM	1.70735	2997.43	0	0	0	1	0
SPTSSB	1.70705	1727.96	0	1.18212e-132	0	0	1
CCDC69	1.70703	6249.18	0	0	0	1	0
MMP15	1.7068	5398.65	0	0	0	1	0
SLC25A4	1.70642	13613.6	0	0	0	1	0
CACNA1D	1.70642	3948.64	0	0	0	1	0
ATP10D	1.70631	1610.23	0	4.06118e-272	1	2.66179e-195	3.8967e-178
MASP1	1.70623	9358.35	0	0	0	1	0
TMOD1	1.70619	11650.2	0	0	0	1	0
COL14A1	1.70613	2185.39	0	1.28814e-219	1	0	0
ACTC1	1.70583	18430.5	0	0	0	1	0
FRZB	1.7057	1754.08	0	1.84327e-304	1	2.47595e-252	4.72162e-144
GYG1	1.70544	3467.62	0	0	0	1	0
DKK3	1.70503	6242.11	0	0	0	1	0
KCNH2	1.70493	5293.05	0	0	0	1	0
CALB1	1.70493	5196.19	0	1	0	0	0
SLCO2A1	1.70463	2390.64	0	1.06548e-242	0	0	1
NTRK2	1.70359	1969.41	0	0	1	8.44334e-262	1.89432e-176
IGDCC3	1.70351	4056.65	0	0	1	0	0
RARRES2	1.70328	10531.6	0	1	0	0	0
AC002454.1	1.70314	2375.43	0	0	1	5.46352e-307	5.21644e-257
VSNL1	1.7027	6201.03	0	1	0	0	0
ALPK2	1.70257	11374.3	0	0	0	1	0
EOMES	1.70244	8664.51	0	1	0	0	0
FGF18	1.70239	1972.95	0	1.25138e-202	0	1	3.87259e-245
EPSTI1	1.70224	2325.56	0	0	0	0	1
TIMP3	1.70224	5752.94	0	0	0	1	0
PRDM16-DT	1.70176	1809.24	0	3.37724e-272	0	1	1.79915e-113
NPPB	1.70165	6500.93	0	0	0	1	0
FGF17	1.7014	5854.33	0	1	0	0	0
ADCY5	1.70126	4070.82	0	0	0	1	0
NREP	1.70107	8404.31	0	0	0	1	0
FABP5	1.70084	8999.13	0	1	0	0	0
PLAC9	1.70078	2763.2	0	9.10148e-219	1	0	1.80868e-186
ATP13A3	1.70039	3373.9	0	0	0	1	5.96158e-225
LMO7	1.70017	6839.43	0	0	0	1	0
CST1	1.70007	3967.74	0	0	0	0	1
IFITM1	1.69986	13346.8	0	1	0	0	0
TFPI	1.69982	4193.06	0	0	1	0	4.34223e-258
FST	1.69924	3096.84	0	1	0	0	5.17811e-262
MITF	1.6988	7111.67	0	0	0	1	0
MDH1	1.6987	9113.16	0	0	0	1	0
PDLIM5	1.69866	12060.9	0	0	0	1	0
MMP2	1.69823	4597.65	0	0	1	0	0
IER3	1.6982	6874.01	0	1	0	0	0
STARD4-AS1	1.69782	4714.26	0	0	0	1	0
JARID2	1.69682	3819.97	0	1	0	0	3.79666e-270
PRDX1	1.69675	2687.29	0	1	0	0	0
GPRIN3	1.69666	3374.06	0	0	0	1	0
SLC7A8	1.69662	9192.17	0	1	0	0	0
EMILIN2	1.69657	7788.14	0	0	0	1	0
TTN	1.69635	18187	0	0	0	1	0
AC004889.1	1.69633	5449.78	0	1	0	0	0
OXCT1	1.69632	3224.41	0	1.48264e-273	0	1	0
PEG10	1.69631	3634.07	0	0	0	0	1
CITED4	1.69624	5601.23	0	0	0	1	0
STARD4	1.69597	2338.71	0	1.02596e-235	0	1	0
LOX	1.69509	1722.37	0	3.63749e-242	1	0	1.73951e-99
GSTA1	1.69495	1451.42	0	1.40512e-250	2.32189e-184	1.43679e-299	1
PPP1R3C	1.69402	6141.97	0	0	0	1	0
CYTOR	1.69398	1657.5	0	0	1	1.02567e-138	1.50777e-177
NTS	1.69355	5131.86	0	1	0	0	0
RHOQ	1.69347	6830.26	0	0	0	1	0
CPEB4	1.69282	4833.91	0	0	0	1	0
AMIGO2	1.69274	1686.59	0	1.88854e-97	1	0	7.55432e-156
DIO3	1.69272	1641.95	0	1.32464e-174	1.71827e-291	0	1
STK39	1.69214	2977.08	0	0	0	1	0
SBSPON	1.69188	1516.67	0	8.71875e-291	1	5.42727e-156	1.91102e-137
EBNA1BP2	1.69164	1741.97	0	1	1.18486e-254	3.79398e-308	1.03696e-231
L1TD1	1.69146	14684.8	0	1	0	0	0
HLA-B	1.69122	6645.97	0	0	0	0	1
FAM189A2	1.69111	6041.12	0	0	0	1	0
CYB5R1	1.69061	2823.67	0	0	0	1	4.97735e-289
DLK1	1.69058	6971.69	0	0	0	0	1
PFKP	1.69048	11339.5	0	0	0	1	0
TDGF1	1.69039	16546.7	0	1	0	0	0
PHLDA2	1.68934	3344.24	0	1	0	0	5.03248e-287
PROX1	1.68899	5450.2	0	0	0	1	0
GATA3	1.68895	6693.33	0	0	0	0	1
IRX3	1.68858	2661.72	0	0	0	1	2.82857e-295
GSN	1.68855	2942.78	0	0	0	1	2.45978e-252
CYP1B1	1.68826	3646.03	0	1	0	0	1.43505e-251
CNTNAP2	1.68824	9746.16	0	1	0	0	0
TNC	1.68822	2105.29	0	0	1	8.55529e-262	1.12945e-160
VTN	1.68818	3997.59	0	0	0	0	1
APOE	1.68795	3953.59	0	0	0	0	1
PRADC1	1.68788	2206.1	0	0	1.72341e-280	1	3.39568e-269
LGALS1	1.68697	2335.45	0	1.27343e-93	1	0	7.02274e-202
BMP4	1.68598	4564.93	0	0	1	0	8.66117e-268
PPP1R14B	1.68596	3749.8	0	1	0	0	2.99777e-307
GDF6	1.68587	2076.7	0	0	1	3.64673e-252	2.76427e-220
NEBL	1.68569	16242	0	0	0	1	0
AL009031.1	1.68471	2816.33	0	1	0	0	7.6021e-195
CFC1	1.68341	2067.24	0	0	1.76101e-256	1	2.87746e-195
LINC00458	1.68319	6946.87	0	1	0	0	0
CRABP1	1.68227	16269.4	0	1	0	0	0
PLP1	1.6815	2349.36	0	1	0	0	8.60101e-187
UNC13C	1.67986	1710.66	0	1.7517e-300	5.57843e-212	0	1
NFE2L3	1.67986	9623.15	0	1	0	0	0
HSPA8	1.67982	4491.46	0	1	0	0	0
AC018647.1	1.6786	2116.99	0	0	3.00376e-260	1	2.388e-231
CAMK2N1	1.67854	3795.62	0	2.65149e-295	0	0	1
MYLK3	1.67815	11799.3	0	0	0	1	0
TRH	1.67813	3981.59	0	0	0	1	0
USP44	1.67799	10471.2	0	1	0	0	0
EHD3	1.67755	1806.18	0	3.15609e-282	2.2248e-224	1	3.82569e-220
NOSTRIN	1.67724	2011.43	0	0	7.05388e-254	0	1
MYRF	1.67707	3779.39	0	0	1	0	0
KCNK6	1.6766	2500.18	0	2.66613e-114	1	0	5.3963e-232
LINC02772	1.67634	3358.89	0	0	0	0	1
RBM24	1.67632	11532.9	0	0	0	1	0
SSPN	1.67565	2171.09	0	0	7.97946e-223	1	1.83515e-252
APOC1	1.67526	7232.98	0	0	0	0	1
PALM2-AKAP2	1.67484	10802.6	0	0	0	1	0
CRIP2	1.6743	13465	0	0	0	1	0
TANC1	1.67365	2739.01	0	0	0	1	5.24832e-308
WNT2	1.67338	1799.99	0	0	1.30328e-192	1	8.07181e-201
CMYA5	1.67249	12594.1	0	0	0	1	0
OSR1	1.6719	1815.07	0	0	5.75983e-215	1	1.59545e-176
ATP1B1	1.67189	6299.94	0	0	0	1	0
COL2A1	1.67175	10325	0	0	0	1	0
PAM	1.67153	6519.65	0	0	0	1	0
PLS3	1.66984	2130.48	0	6.07653e-149	1	0	2.90699e-205
TNNT2	1.6682	19865.1	0	0	0	1	0
COBLL1	1.6665	4011.32	0	0	1	0	3.85202e-218
ENC1	1.66582	1881.51	0	1.73362e-123	1	0	1.4978e-98
TUBB3	1.66573	10287.8	0	1	0	0	0
NEXN	1.66562	14481.4	0	0	0	1	0
ITPR2	1.66527	3623.16	0	1	0	0	0
SP5	1.66515	8663.25	0	1	0	0	0
MRAS	1.66471	4049.56	0	0	0	1	0
FOXH1	1.6641	8429.14	0	1	0	0	0
GOLIM4	1.66315	1804.37	0	0	2.11601e-207	1	1.61915e-188
CLDN3	1.66304	8189.54	0	0	0	0	1
GAD1	1.66301	4580.23	0	1	0	0	3.16029e-298
NLGN4X	1.66269	7034.19	0	1	0	0	0
ELK3	1.66262	2959.93	0	4.39034e-168	1	0	0
MTUS1	1.66259	3562.26	0	0	0	1	0
ADAMTSL4	1.66158	2894.74	0	0	0	1	0
CHCHD10	1.66149	10533.6	0	0	0	1	0
DUT	1.66132	4207.43	0	1	0	0	0
SH3KBP1	1.66108	2653.89	0	0	2.55069e-305	1	0
CELF2	1.65967	2711.83	0	0	0	1	0
FBN2	1.65952	6006.64	0	0	0	1	0
UQCRQ	1.65892	3300.54	0	0	0	1	0
MCM10	1.65825	2782.11	0	1	0	0	4.80038e-263
ATP5MC3	1.65818	8871.58	0	0	0	1	0
CHCHD2	1.65818	2092.49	0	2.01311e-165	1	0	7.41605e-239
SYTL5	1.65817	3618.1	0	0	0	1.48136e-300	1
RTL8C	1.65736	4378.48	0	0	0	1	0
TCEA3	1.65717	10564.5	0	0	0	1	0
HACD1	1.65631	8596.57	0	0	0	1	0
DMD	1.65597	3087.73	0	0	0	1	2.19255e-182
ID1	1.65452	6428.71	0	0	0	0	1
TIMP1	1.65371	5627.49	0	0	1	0	0
GNG4	1.65324	7102.63	0	1	0	0	0
PRSS35	1.65274	3018.71	0	0	0	1	0
COL1A1	1.65247	14050.1	0	0	1	0	0
RBM20	1.65069	7319.03	0	0	0	1	0
PTN	1.6491	3451.63	0	0	1	0	0
SYNPO	1.64909	1526.73	0	2.71689e-275	1	2.22574e-129	1.50888e-177
CGN	1.64904	5225	0	9.92558e-215	0	0	1
RSPO3	1.64528	2304.09	0	1.18491e-289	1	0	0
NPNT	1.64526	2002.83	0	0	3.23733e-225	1	6.03911e-166
SLC9A3R1	1.64508	5834.09	0	0	1	0	1.18876e-235
PIF1	1.64285	3847.5	0	1	0	0	3.4505e-293
FLRT3	1.64231	4832.07	0	0	0	0	1
IGFBP6	1.64222	2420.79	0	0	0	4.00864e-130	1
CREM	1.64048	4520.4	0	0	0	1	0
ARHGAP18	1.63975	1598.21	0	6.31214e-102	2.51338e-148	0	1
ZFP42	1.63824	7609.77	0	1	0	0	0
UBE2T	1.63692	1548.21	0	1	8.97019e-187	4.44986e-308	1.7283e-180
FXYD1	1.63672	6642.37	0	0	0	1	0
FBXO32	1.6352	5046.06	0	0	0	1	0
SIX3	1.63299	5401.76	0	1	0	0	0
MT-CO3	1.6316	5152.49	0	1	0	0	0
ISL1	1.63071	2527.15	0	0	5.64502e-284	0	1
ADGRG6	1.63028	2000.49	0	0	7.32305e-151	0	1
SCN5A	1.62855	1444.54	0	2.13847e-61	1.04787e-287	1	3.74802e-142
NR2F1	1.6263	1961.46	0	0	1	1.94378e-296	7.36958e-68
COL21A1	1.62603	1445.15	0	5.83596e-216	1	2.49733e-125	5.83596e-216
DENND5B	1.6239	6645.3	0	0	0	1	0
MEF2C	1.62371	8973.16	0	0	0	1	0
PRSS1	1.62368	2031.74	0	6.4024e-149	0	0	1
PDE5A	1.62274	3938.92	0	1	0	0	3.73291e-239
LRRN4	1.62102	2028.81	0	0	1	3.3204e-121	3.2342e-238
HEY1	1.62049	1511.33	0	0	1	8.87582e-106	5.66448e-104
SELENOW	1.61979	7445.73	0	0	0	1	0
ERRFI1	1.6182	2622.13	0	1.41386e-290	1.1583e-204	0	1
FAM114A1	1.61594	3180.84	0	0	1	0	1.28324e-167
TNNI1	1.61567	19984.9	0	0	0	1	0
BUB1B	1.61459	3863.17	0	1	0	0	1.71053e-282
MYL7	1.61425	19527.9	0	0	0	1	0
DGKI	1.6135	5536.48	0	0	0	1	0
KIF26B	1.61179	8207.34	0	0	0	1	0
EFNB2	1.60967	1711.31	0	2.21919e-88	1	0	6.09668e-103
CCDC80	1.60855	8898.5	0	0	1	0	0
VAMP8	1.60789	8857.31	0	1	0	0	0
S100A16	1.60546	2466.86	0	0	1.75466e-242	0	1
UBE2S	1.6051	4340.75	0	1	0	0	0
CAV2	1.60454	2032.6	0	0	6.01181e-200	1	5.12028e-133
HMGB3	1.60369	8851.5	0	1	0	0	0
FOXA2	1.60335	10863.9	0	0	0	0	1
PHLDA1	1.60305	2373.07	0	2.3962e-68	1	0	3.87469e-279
LINC02381	1.60114	5750.44	0	0	1	0	2.42992e-217
ID4	1.59971	4776.03	0	0	0	0	1
RTN4	1.59942	5212.9	0	0	0	1	0
BMP7	1.59929	6617.14	0	0	0	1	7.79184e-304
PPP1R14A	1.59919	1494.27	0	1.13724e-63	1	3.80123e-187	2.85488e-273
CADPS	1.59797	4238.43	0	0	0	1	1.51074e-190
CCDC141	1.59775	8122.07	0	0	0	1	0
FILIP1	1.59733	14372.1	0	0	0	1	0
GNG12	1.59578	2521.87	0	6.92455e-297	1	1.1472e-225	0
CFL2	1.59506	4707.4	0	0	0	1	0
CRABP2	1.59499	1473.14	0	1.46011e-221	1	5.22369e-132	2.29163e-217
TPM4	1.59361	5553.06	0	0	1	0	0
DSEL	1.59165	6965.71	0	1	0	0	0
HAND2-AS1	1.59158	4064.71	0	0	5.59311e-294	1	0
DOK5	1.58864	1951.15	0	1.88411e-53	1	0	2.82908e-216
FLNC	1.58824	9934.2	0	0	0	1	0
STC1	1.58746	2251.86	0	1	0	2.37664e-227	2.01509e-124
COLGALT2	1.58721	1710.69	0	1.01866e-284	1.09569e-142	1	7.53153e-227
LTBP1	1.58578	4851.22	0	0	0	1	0
PEA15	1.58567	2348.92	0	0	9.43678e-206	1	0
LAMC1	1.58455	3211.42	0	0	1	6.45239e-265	0
RHOU	1.5829	5803.17	0	0	1	0	1.81876e-174
TLCD4	1.58149	4665.11	0	0	0	1	1.08556e-176
PSAT1	1.58017	6847.61	0	1	0	0	0
TTYH1	1.57991	3468.74	0	1	0	0	1.2199e-216
ACAT2	1.57769	1863.22	0	1	5.35482e-168	0	9.04326e-138
AKAP12	1.57675	7807.88	0	0	1	0	0
FZD5	1.57658	3842.43	0	4.2443e-68	0	0	1
PLCXD3	1.57569	3213.26	0	0	0	1	1.72395e-129
TMEM88	1.57455	9521.55	0	0	1	0	0
CLDN4	1.57372	3379.74	0	7.86219e-51	0	0	1
ARL4D	1.57323	1516.14	0	2.03077e-96	1	0	1.4345e-75
CHRM2	1.57137	3047.49	0	0	1.2799e-237	1	0
HOPX	1.56795	2662.79	0	0	4.12111e-178	1	0
UCHL1	1.56646	7870.74	0	1	0	0	0
RPL22L1	1.56608	1619.48	0	1	5.18366e-174	3.90345e-254	4.1748e-277
HAND1	1.5645	6393.12	0	0	1	1.14082e-265	0
TNFRSF12A	1.56274	2335.62	0	1.49411e-99	0	1	0
NQO1	1.56156	1793.59	0	1	6.89541e-182	0	4.10538e-154
PKIA	1.5591	4055.56	0	0	0	1	0
CCND1	1.55873	5384.24	0	1	0	0	2.64156e-211
LITAF	1.55789	1557.97	0	1.17125e-84	1	0	7.74682e-52
CDC42EP5	1.55689	1669.82	0	3.24238e-248	1	2.61036e-119	7.6076e-260
CAP2	1.5558	10004.5	0	0	0	1	0
MYL9	1.55459	13105.7	0	0	0	1	0
SEMA6A	1.55405	9543.82	0	1	0	0	0
ALPK3	1.55385	5641.75	0	0	0	1	3.68659e-239
PLAAT3	1.55327	7535.88	0	1	0	0	0
RCSD1	1.55168	7761.9	0	0	0	1	0
IDH2	1.55129	7073	0	0	0	1	0
HSPH1	1.5485	1540.37	0	1	1.33812e-293	1.05932e-115	1.23733e-205
LBH	1.54841	6211.2	0	0	0	1	0
MSRB3	1.54832	7949.36	0	0	0	1	0
HSPB1	1.54526	12830.9	0	0	0	1	0
PALLD	1.54089	11099.7	0	0	0	1	0
KRT18	1.53795	7349.56	0	0	1	0	1.03358e-282
COX7B	1.53757	9443.29	0	0	0	1	0
THY1	1.53664	8541.95	0	1	0	0	0
CCNB1	1.536	4777.8	0	1	0	0	5.22705e-298
LRAT	1.53538	1648.36	0	1	0	9.1036e-134	3.43594e-195
H2AFZ	1.53532	6412.06	0	1	0	0	0
NPW	1.53471	2706.91	0	1	6.90121e-258	0	5.92332e-218
FN1	1.53044	10025.3	0	0	0	0	1
AQP1	1.52965	3427.62	0	0	5.00552e-226	1	0
SESN3	1.529	1981.88	0	0	1	0	8.11974e-61
DYNLT3	1.52856	1592.94	0	0	4.01598e-127	5.05964e-104	1
ZFP36L1	1.52685	4231.66	0	0	1.28349e-263	1	0
MIR302CHG	1.52657	13029.6	0	1	0	0	0
LAMB1	1.52655	1604.82	0	0	3.13611e-129	1.63796e-170	1
DANCR	1.52373	6692.44	0	1	0	0	0
MAP1LC3A	1.52162	1691.5	0	9.09528e-290	1	4.64489e-42	4.80681e-200
VASH1	1.52156	1475.02	0	2.21579e-254	1	1.15504e-41	2.44079e-174
MT-ATP6	1.52073	5406.15	0	1	0	0	0
CNN1	1.52005	7070.22	0	0	0	1	0
COL5A2	1.51889	6686.81	0	0	1	0	0
FSTL1	1.51787	3974.91	0	0	1	3.0052e-251	0
LIFR	1.51636	5092.7	0	0	1	0	1.79175e-187
JPH1	1.51616	1628.5	0	3.13371e-66	7.86676e-233	1	2.48045e-271
ARL6IP5	1.51532	5363.03	0	0	0	1	0
RGS16	1.5151	3694.32	0	1	0	0	3.19378e-190
PRSS2	1.51377	2212.65	0	9.20524e-97	0	0	1
ROBO2	1.5135	3384.37	0	0	9.48953e-130	0	1
ANKRD1	1.51238	7639.23	0	0	0	1	7.70856e-261
MYOF	1.50953	2230.18	0	0	1.09837e-108	2.09025e-221	1
JUN	1.50739	1993.83	0	0	1	4.00094e-96	8.36982e-201
IL6ST	1.50574	9047.42	0	0	1	0	0
PCDH17	1.50509	3008.37	0	0	2.41685e-127	0	1
PRICKLE1	1.50455	4933.67	0	0	2.61914e-307	1	0
KRT19	1.50393	7687.04	0	0	0	0	1
TUBA1C	1.50204	8615.99	0	1	0	0	0
IGFBP4	1.50145	3167.24	0	1	1.37944e-239	0	0
LMOD1	1.50015	5082.69	0	0	0	1	0
CREB5	1.49999	2056.76	0	0	1	2.69537e-83	7.12653e-240
EVA1B	1.49761	4325.9	0	1.87721e-85	1	0	6.74252e-242
SEPTIN11	1.49312	5751.58	0	0	1	0	0
COL5A1	1.49294	4596.35	0	0	1	3.73691e-195	0
RCAN1	1.49027	1879.07	0	0	1.3223e-127	1	1.16069e-209
HIST1H1D	1.48943	4369.12	0	1	1.63901e-282	0	2.11686e-243
NRP2	1.48872	5622.29	0	0	1	4.75812e-303	0
CHAC1	1.48867	1470.3	0	1	1.919e-122	4.20458e-301	2.47814e-166
SLC2A3	1.4877	4261.6	0	1.91629e-118	0	0	1
HIST1H3G	1.48745	1981.46	0	1	3.88477e-180	0	9.25386e-143
MAP1A	1.4862	2553.39	0	0	3.51774e-110	1	1.81133e-307
HIST1H2AL	1.48499	1493.07	0	1	2.23937e-130	0	1.15103e-127
MYL6	1.48432	6216.79	0	0	0	1	0
MT-CYB	1.48069	3224.21	0	1	0	1.57324e-142	0
HCN4	1.48045	3671.35	0	0	1.69439e-244	1	0
RFTN1	1.47964	3309.9	0	0	1	1.16308e-88	0
GSTM3	1.47725	3373.18	0	0	6.819e-179	1	1.07659e-304
IGFBP2	1.47346	6977.72	0	1	0	0	3.1752e-207
PTTG1	1.47332	3700.36	0	1	1.73511e-263	0	2.47412e-285
MT-ND5	1.46768	7628.13	0	0	0	1	0
CCNA2	1.46529	3170.21	0	1	1.10922e-304	0	2.83785e-219
TXNDC17	1.46443	2651.27	0	1	3.80546e-147	0	2.67472e-150
CYP26A1	1.46193	1584.55	0	1	1.45865e-256	2.43289e-303	1.23535e-54
CEBPD	1.45996	2534.49	0	0	1	2.82041e-39	2.06561e-296
PIMREG	1.45665	2717.4	0	1	2.75351e-305	0	7.3201e-146
RAMP1	1.45449	1860.11	0	0	8.55758e-68	1	1.36102e-207
FLNA	1.44827	2568.14	0	1.44881e-52	1	0	7.2492e-153
RELN	1.44708	3393.5	0	0	1	4.34364e-79	0
TECRL	1.44586	9868.08	0	0	0	1	0
EMP3	1.44495	5247.06	0	0	1	1.67462e-161	0
CAMK2D	1.44438	4703.67	0	0	0	1	1.90841e-157
TERF1	1.44352	4576.97	0	1	7.93169e-171	0	0
MME	1.44185	1555.89	0	5.35179e-11	1	9.08591e-277	3.85917e-139
SAMD3	1.44018	2404.14	0	1	0	0	1.57931e-85
HIST1H1B	1.43727	3773.64	0	1	2.67209e-306	0	4.56047e-186
ITM2A	1.43688	1876.04	0	1	2.95496e-146	0	9.96676e-252
KLF6	1.4363	1687.27	0	2.22208e-162	1	0	9.20861e-29
HIST1H1A	1.43559	2829.07	0	1	2.99392e-133	0	3.23226e-211
GAP43	1.43312	3564.42	0	3.0869e-08	1	0	0
ARHGAP11A	1.43278	1709.26	0	1	6.35938e-184	0	1.06498e-96
PDGFA	1.43262	2482.57	0	1	0	0	5.03902e-62
CAPN2	1.43255	2403.33	0	0	1	5.28616e-76	1.61757e-190
MYL12B	1.43216	1630.77	0	1.50938e-59	1	0	4.41916e-148
JPT1	1.43176	3270.33	0	1	4.15734e-165	0	2.52842e-161
PLXNA4	1.43083	2674.52	0	0	5.93745e-116	1	0
CKB	1.43021	4636.86	0	4.73709e-122	0	0	1
SLC1A3	1.42836	1535.87	0	7.62011e-92	8.31141e-142	1	0
SH3GL3	1.42768	2340.78	0	0	1.11339e-115	1	0
EMP2	1.42544	8232.02	0	0	0	1	0
PKP2	1.42484	6984.93	0	0	0	1	0
AC108052.1	1.41913	3596.62	0	6.50142e-37	0	0	1
HIST1H2AH	1.41484	1699.26	0	1	1.09209e-152	0	1.16482e-79
NES	1.41426	7535.29	0	0	0	1	0
RAB25	1.41295	12327.3	0	1.66904e-124	0	0	1
SPATS2L	1.4111	2133.96	0	3.20198e-66	1	0	1.12235e-63
HIST1H4C	1.41083	4358.46	0	1	1.75994e-291	0	6.75891e-141
CAVIN1	1.4107	3575.65	0	0	1.7795e-185	1	0
MICAL2	1.41051	6147.14	0	0	1	4.08125e-98	0
EDNRA	1.4076	3601.7	0	0	3.86691e-242	1	6.3532e-190
FZD1	1.40384	1613.72	0	7.44057e-304	1.53522e-48	1	3.00263e-161
CST3	1.40349	4780.15	0	0	4.27481e-154	0	1
MATN2	1.4028	2966.69	0	0	5.20724e-128	1	0
CD24	1.39877	10143.8	0	1.14916e-285	0	0	1
VIM	1.39874	17299.2	0	0	1	0	0
PLK1	1.39836	2541.09	0	1	8.25583e-229	0	3.77211e-159
RGS3	1.39827	1996.89	0	0	1	1.54536e-28	2.69948e-149
MXRA7	1.39529	5988.97	0	0	3.07257e-221	1	0
ZNF208	1.39498	1473.36	0	1	2.0332e-72	0	9.34378e-68
WFDC2	1.39423	10608	0	1.07434e-79	0	0	1
KPNA2	1.39098	2432.44	0	1	1.10809e-106	0	6.354e-227
NCAPG	1.38336	2939.03	0	1	1.65221e-218	0	1.52863e-196
ATP5MC1	1.38204	7440.95	0	7.5994e-220	0	1	0
HES1	1.38035	2732.65	0	1.2349e-76	1.00497e-92	0	1
MT-CO2	1.38033	4905.39	0	1	0	2.7026e-165	0
JADE1	1.37598	2400.48	0	1.08724e-11	2.24885e-195	0	1
TOX3	1.37322	4875.19	0	7.87007e-11	0	0	1
ITGB1	1.37075	3184.84	0	0	1	2.68294e-106	0
TUBA1A	1.37058	1676.48	0	7.02307e-61	1	4.38978e-220	3.08045e-298
SVIL	1.36779	8612.99	0	0	0	1	0
MARCKS	1.36714	10062.6	0	0	1	0	0
TENT5A	1.36573	1933.97	0	0	6.365e-285	1	3.9118e-48
CDK6	1.36084	5538.89	0	0	1	6.54706e-136	0
LHFPL6	1.35645	2062.27	0	0	1	1.39629e-09	1.74192e-221
TK1	1.35627	1625.4	0	1	3.09095e-135	0	2.23423e-86
CDC42EP3	1.35373	1602.94	0	1.0767e-232	2.60924e-64	1	2.85135e-249
ONECUT1	1.35137	5157.33	0	1.25968e-08	0	0	1
HEG1	1.34965	2568.36	0	0	2.24754e-83	1	5.17871e-241
KCNQ1OT1	1.34954	4322.02	0	0	1	0	5.1594e-47
S100A10	1.34911	12575	0	0	1	0	9.73895e-260
LRP2	1.34812	1605.88	0	0	1	1.73843e-178	2.18822e-14
PTPRD	1.34742	3901.16	0	0	3.6017e-107	1	0
CDKN3	1.34465	2397.65	0	1	3.64039e-182	0	1.8929e-184
TKT	1.34012	13996.8	0	1	0	0	0
ATP2B4	1.33928	3713	0	0	4.35808e-85	1	0
SH3BGRL3	1.33803	6112.04	0	7.32093e-157	1	0	3.3445e-273
CDKN1C	1.33788	2451.5	0	0	1	3.03974e-239	9.72125e-54
GADD45A	1.33433	2496.91	0	0	1	1.59348e-34	2.1137e-239
SMTNL2	1.33257	4328.41	0	0	2.82504e-147	1	0
MLLT11	1.33207	2192.96	0	2.93347e-296	4.87504e-41	1	0
JAG1	1.32973	2469.78	0	0	8.81463e-70	1	0
DES	1.32917	1678.03	0	2.98991e-273	1.04654e-30	1	5.29419e-204
TPM1	1.32263	19128.8	0	0	0	1	0
LIX1	1.32	4948.56	0	0	1	6.35887e-53	0
LRRN1	1.31394	4292.91	0	1	0	0	1.70469e-91
SFRP5	1.31378	2269.61	0	0	1	4.8715e-140	0.0003537
PLPP2	1.31356	9265.09	0	1	0	0	3.69604e-253
SLC16A12	1.31279	2279.16	0	1.24853e-193	2.78134e-122	1	0
LHX1	1.30561	2847.65	0	1.2607e-66	0	0	1
MIR100HG	1.30316	3413.64	0	0	1	2.59667e-07	0
EPCAM	1.29973	18150.3	0	2.22531e-268	0	0	1
TGFB2	1.29812	4833.29	0	0	1	4.56027e-52	0
BMP5	1.29674	6409.75	0	0	5.72653e-138	1	0
KCTD12	1.28304	3516.95	0	0	1	2.49153e-30	0
H19	1.28271	3192.48	0	0	4.95591e-243	1	4.63651e-280
NFIB	1.28245	1715.79	0	6.49064e-206	1	1.0459e-20	1.06428e-270
FLRT2	1.28154	3996.57	0	0	1	0	1.01902e-36
SGO2	1.27366	1834.63	0	1	7.71746e-139	0	1.82322e-106
GLDC	1.26641	7162.63	0	1	0	0	7.86059e-117
C12orf75	1.26169	2485.52	0	6.26682e-285	0	1	7.96394e-09
NUDT4	1.26091	3852.92	0	0	0	1	2.53131e-24
FBXO5	1.26062	1615.35	0	1	2.20544e-118	0	3.44097e-59
H2AFJ	1.25598	1594.77	0	2.47534e-22	1	7.35908e-192	2.1703e-274
TAGLN2	1.25419	4033.66	0	2.25784e-53	1	0	2.32093e-45
CALB2	1.25398	1749.48	0	0	1	1.08742e-31	1.42326e-145
SLIT2	1.25314	1566.83	0	1.05431e-184	2.99047e-42	1	2.09069e-273
PCDH10	1.25237	6122.14	0	1	0	0	5.20177e-36
HMGB1	1.24828	7419.3	0	1	0	0	4.03141e-231
GSTP1	1.24581	9535.32	0	1	0	0	1.782e-244
ASPM	1.24425	2947.36	0	1	7.71906e-196	0	8.64738e-144
GPC3	1.23956	6649.43	0	0	3.76924e-37	0	1
CDH1	1.2394	15611.5	0	1	0	0	1.50084e-234
ENO2	1.2351	2649.3	0	0.00871111	0	1	2.29073e-58
ALCAM	1.23263	3423.89	0	0	0	5.06313e-27	1
CGNL1	1.23109	6062.21	0	0	1	2.59755e-64	0
MIR205HG	1.22648	6291.35	0	1	0	0	4.17919e-43
SPDL1	1.22633	1587.23	0	1	1.30309e-84	0	3.46289e-79
EFEMP1	1.2237	2191.85	0	1	9.87284e-83	0	3.62675e-114
CSRP2	1.2218	6593.45	0	0	1	4.33821e-145	0
KIFAP3	1.22153	4733.7	0	0	3.4469e-62	1	0
CLDN7	1.2203	15189.2	0	1	0	0	3.13252e-184
MGST3	1.22004	6627.3	0	0	9.0177e-107	1	0
COL4A2	1.21911	5064.82	0	0	4.7831e-147	1	9.69143e-187
HIST1H3B	1.21663	2511.23	0	1	6.41875e-167	0	1.68736e-102
ODC1	1.2149	3009.75	0	8.73944e-94	6.16152e-61	0	1
SERPINE2	1.21332	7117.61	0	7.91619e-09	4.6224e-267	0	1
KRT8	1.21167	10459.8	0	0	1	0	1.68249e-169
NCAM1	1.21083	6124.71	0	0	6.10437e-78	1	0
AHNAK	1.20613	7089.89	0	0	1	0	1.50353e-89
FAM13C	1.20481	1739.24	0	3.02007e-307	1.09862e-35	1	4.72622e-187
COLEC12	1.2019	3263.05	0	0	1	1.22679e-189	2.19733e-48
KDR	1.20153	2069.74	0	9.929e-15	1	1.37892e-97	0
FAM162A	1.19782	4477.51	0	2.3663e-160	0	1	8.28081e-54
IGFBP3	1.19646	6035.68	0	0	1	0	1.35528e-10
DIAPH3	1.19506	1521.39	0	4.92019e-06	1	7.96342e-240	1.82306e-22
SLC3A2	1.19111	4163.69	0	1	3.11201e-82	0	1.46249e-180
RRAS	1.19053	2143.09	0	4.78164e-228	1	6.70448e-05	0
KIF4A	1.19033	1833.38	0	1	1.41045e-117	0	7.25852e-90
FKBP11	1.18913	2458.89	0	1	1.59363e-191	0	2.33433e-61
ANXA2	1.18492	2109.53	0	5.13754e-262	5.96147e-19	3.7071e-228	1
FAM107B	1.18283	3911.45	0	1.12103e-98	6.75924e-32	0	1
MT2A	1.18204	4335.14	0	1	2.9573e-152	0	0
CARMN	1.17996	1746.77	0	6.51161e-292	3.19986e-18	1	3.39189e-181
LIMA1	1.17962	3693.85	0	1	3.4816e-68	0	2.53665e-210
RHOC	1.17671	2713.72	0	0	1	7.852e-25	7.04475e-141
TPM2	1.17604	8777.39	0	0	3.6291e-88	1	0
ACTA2	1.17217	8172.87	0	0	7.86409e-25	1	0
FOXC1	1.15972	1748.82	0	6.07327e-30	2.39862e-09	2.93054e-236	1
CPE	1.15385	4016.09	0	0	1	1.1394e-09	0
TUBA1B	1.15021	4186.82	0	1	3.09337e-18	0	7.95557e-154
HSPG2	1.14781	1848.35	0	0	9.09537e-226	1	5.68744e-11
PTMA	1.13924	13019.9	0	1	0	0	0
SAT1	1.1381	3682.79	0	1	0	0	1.96757e-22
SCN7A	1.13651	1544.41	0	2.65072e-143	0.000546238	1.33018e-149	1
MSX1	1.1276	1634.75	0	1.56269e-10	1	5.42214e-299	3.24215e-130
NRP1	1.12573	5022.51	0	0	1.41294e-22	1	0
MT-ND2	1.12129	5425.72	0	3.49027e-26	0	1	0
NNAT	1.12051	3063.72	0	1	8.38291e-74	0	4.27727e-266
CENPW	1.12051	4837.43	0	1	2.75262e-80	0	6.61004e-302
HNF1A-AS1	1.11969	5648.85	0	0	0	1	3.34748e-21
CYCS	1.11619	7901.19	0	1.04835e-33	0	1	0
LIN28A	1.11556	12342.5	0	1	0	0	4.67462e-40
ANXA3	1.11267	3240.1	0	0	9.68895e-247	1	1.36765e-19
NSG1	1.10486	2899.91	0	1	1.56449e-78	0	9.06483e-298
IGFBP7	1.10333	3692.06	0	0	1	3.86787e-35	1.47662e-175
PDLIM7	1.10038	2755.68	0	0	1	1.28584e-09	2.0029e-152
LINC01356	1.09512	12290.1	0	1	0	0	1.28819e-57
ERBB4	1.09062	2591.91	0	0	8.68086e-244	1	7.3173e-35
NID2	1.0875	9300.01	0	0	4.47306e-24	1	0
GUCY1A1	1.08449	7570.36	0	0	2.33051e-17	1	0
TMSB4X	1.08125	8007.11	0	1	3.30452e-13	0	0
SYNE1	1.07775	2456.28	0	0	2.94831e-15	1	2.66789e-201
HAND2	1.07417	7750.76	0	0	1.43114e-07	1	0
RIN2	1.07055	1497.07	0	1.38828e-284	3.22046e-22	1	6.50758e-117
DOK4	1.06858	5468.32	0	0	1	7.53764e-07	0
CLSTN2	1.0677	2387.33	0	0	4.72825e-14	1	1.0247e-249
FLNB	1.06762	1489.41	0	3.95684e-42	4.49949e-06	1.55846e-196	1
CTSV	1.06027	2755.4	0	0	2.20797e-08	1.22731e-220	1
NEAT1	1.05323	2661.24	0	0	2.10324e-16	1	1.22955e-96
CSRP1	1.0508	1444.38	0	2.50285e-160	1	0.000708433	2.27535e-131
RGS5	1.04964	3907.27	0	0	1	6.97678e-42	2.25844e-66
ADAMTS9	1.04777	2859.45	0	0	5.24104e-15	1	4.12147e-165
TNFRSF19	1.04716	1873.97	0	0	1.09383e-150	1	3.71397e-07
UGP2	1.04527	5649.33	0	1	0	1.23115e-13	0
FILIP1L	1.04332	2424.63	0	0	1	0	0.00187935
TGFB1I1	1.04061	2769.05	0	0	2.11429e-12	1	0
TAGLN	1.03702	3559.04	0	0	1	4.43171e-11	0
TMSB10	1.03692	8904.72	0	0	1	0	3.21922e-118
IFI16	1.0239	4899.15	0	0	1	0	0.00015066
LMNA	1.02032	2277.34	0	0	0.000129691	1	1.56909e-253
OTX2	1.01316	3292.74	0	1	0	0	1.94012e-26
SLIT3	1.01034	2651.46	0	0	2.38097e-13	1	1.65381e-142
HTRA1	1.00894	3546.26	0	0	2.47868e-08	1	0
FHL1	1.00848	1572.27	0	1.41468e-112	1.13711e-05	1	1.28242e-283
NMRK2	1.00778	2913.54	0	1	0	1.50605e-20	6.4672e-232
SH3GLB1	-1.45668	4632.57	0	1	0	0	1.0619e-114
TLE1	-1.4747	6419.05	0	0	0	1	0
NR2F2	-1.47893	3170.65	0	1	0	1.10734e-195	0
PRC1	-1.54952	1540.5	0	0	1.1879e-137	1	4.18387e-32
MTRNR2L1	-1.6135	3214.34	0	0	1	0	2.01898e-133
S100A11	-1.62965	10554	0	0	0	1	0
RHOBTB3	-1.65036	8872.78	0	1	0	0	0
HES4	-1.65513	2286.14	0	1	0	0	0
HSPA5	-1.66046	2047.52	0	3.47418e-152	0	1	1.897e-202
MAP1B	-1.66716	2937.99	0	1.41374e-272	0	0	1
ITGAV	-1.67153	1906.01	0	1	7.75975e-219	0	2.24837e-120
LINC01405	-1.67165	5731.25	0	0	1	0	0
TRIM59	-1.67197	1482.6	0	3.86104e-292	6.6169e-119	1	4.21498e-135
ARL6IP1	-1.67266	3046.57	0	0	0	1	0
ACTB	-1.67515	10575	0	0	0	1	0
VCAN	-1.6886	2090.32	0	1	2.4179e-258	0	1.32895e-244
TCAF1	-1.68921	2083.18	0	1	0	0	1.34218e-144
FTL	-1.69109	9852.6	0	0	0	1	0
PCLAF	-1.69549	2596.31	0	0	3.58076e-276	1	1.03792e-179
BAMBI	-1.69712	6545.44	0	1	0	0	0
TUBB6	-1.7043	1907.39	0	2.56812e-299	7.8719e-294	0	1
MALAT1	-1.70807	8958.67	0	1	0	0	0
DSP	-1.71126	3903.01	0	1	0	0	0
IGFBP5	-1.72699	2120.42	0	1	3.67121e-188	0	6.07721e-197
ACTG1	-1.72753	13030.1	0	0	0	1	0
COL4A1	-1.72794	3301.3	0	1	0	0	0
PODXL	-1.73158	1971.6	0	0	5.30469e-259	1	3.22183e-191
DPYSL3	1.08845	1439.5	7.88773902431e-312	8.83768e-24	1.18627e-82	1	0
MGARP	1.5983	1436.89	2.914111033798e-311	1.55199e-201	1	3.62033e-132	6.91049e-224
ARPC1B	-1.50112	1436.56	3.4419131506805e-311	3.60062e-275	4.17307e-182	1	1.41185e-27
DAAM2	1.718	1430.46	7.2326857973207e-310	6.48001e-202	1	1.21634e-210	1.23169e-167
PNCK	1.7225	1425.23	0	6.37122e-212	2.33719e-230	1	7.67515e-123
AC068587.4	1.59514	1422.89	3.18215e-308	5.69041e-237	1	1.62046e-154	1.00197e-171
LOXL2	1.27129	1422.3	4.26345e-308	7.77807e-157	1	8.42998e-06	8.98348e-207
SPP1	1.2997	1419.63	1.61963e-307	4.37326e-26	1	1.8182e-168	2.04679e-28
TBX6	1.72078	1419.08	2.1344e-307	1	2.63883e-246	1.21495e-260	3.17792e-113
HIST1H2AG	1.37956	1415.31	1.40337e-306	1	1.40169e-98	0	1.77324e-100
CA4	1.71962	1409.66	2.36417e-305	5.06644e-138	1.99685e-275	1.24333e-267	1
NUCB2	-1.66938	1407.87	5.78128e-305	1	1.11757e-249	1.2221e-179	1.95345e-198
TWIST1	1.70049	1403	6.59395e-304	1.58707e-247	1	1.82943e-158	2.08867e-147
SLMAP	1.70786	1401.69	1.26923e-303	3.01536e-101	9.87549e-262	1	7.92759e-161
FDPS	1.56914	1392.44	1.28547e-301	1	4.68988e-125	2.32834e-232	8.46902e-227
SLN	1.7257	1384.76	5.96481e-300	6.82407e-226	1	1.72208e-201	3.74623e-127
FGF12	1.38705	1384.01	8.66777e-300	0.00414874	4.3636e-256	1	3.4855e-67
MT1E	1.50903	1382.82	1.57732e-299	1	1.95946e-156	6.76851e-205	2.09651e-241
LHX1-DT	1.4444	1376.95	2.96415e-298	9.74274e-23	1.63576e-198	5.75691e-182	1
EPHA4	1.57685	1376.78	3.21981e-298	3.21656e-58	5.5047e-278	1.10553e-122	1
PMP22	1.24396	1363.08	3.01903e-295	2.8629e-234	5.78118e-38	1	1.33883e-160
SOD3	1.57455	1356.54	7.93311e-294	2.99186e-242	3.36286e-118	1	4.82008e-154
KLF2	1.63943	1349.69	2.4324e-292	9.88242e-264	1	9.08744e-101	2.10092e-130
GJB1	1.73202	1347.24	8.27668e-292	6.32059e-230	1.05781e-253	1.85495e-251	1
PITX1	1.64907	1337.73	9.56092e-290	4.89992e-238	3.11208e-153	1.52771e-266	1
AGT	1.49196	1336.81	1.51609e-289	2.15376e-234	4.93786e-203	1	1.99827e-53
INHBA	1.20205	1336.72	1.58838e-289	5.43035e-233	8.53016e-25	1	2.96715e-140
HIST1H1E	1.59303	1335.47	2.96279e-289	1	1.30023e-152	5.62547e-290	2.50553e-99
CTSB	1.07618	1334.35	5.18562e-289	5.31827e-279	1	7.30239e-15	2.2953e-15
HHIP	1.71662	1332.36	1.40058e-288	9.16416e-217	1	3.90365e-205	1.30018e-106
ARMH4	1.58951	1326.63	2.45438e-287	4.29603e-205	8.65442e-229	1	6.86244e-60
IFIT1	1.30266	1323.29	1.30047e-286	6.45821e-226	2.39444e-42	1	3.25656e-161
PIEZO2	1.39998	1314.94	8.4151e-285	1	1.04169e-86	2.85484e-283	1.52943e-108
RASSF6	1.72826	1311.88	3.88302e-284	1.10204e-223	4.50531e-219	3.40374e-264	1
HOXB-AS3	1.73177	1310.97	6.13227e-284	8.22926e-181	1	6.56428e-225	9.61044e-117
RFLNB	1.55121	1308.36	2.25645e-283	1	7.42154e-133	7.12942e-251	4.18051e-172
TNS1	1.32533	1307.92	2.81897e-283	9.32565e-207	1	3.34463e-13	4.75959e-143
LYL1	1.73203	1307.12	4.20411e-283	2.36362e-175	1	2.21098e-217	3.96305e-132
ST3GAL5	1.49245	1298.22	3.57935e-281	7.08923e-250	1	4.013e-170	4.88416e-37
RASGRP3	1.40212	1292.65	5.79546e-280	5.03586e-222	1.51979e-123	1	4.92397e-152
CDX2	1.05379	1291.68	9.38789e-280	1	6.92281e-162	1.05476e-238	1.57877e-10
STMN2	1.03666	1271.92	1.8199e-275	1	3.96271e-120	1.49051e-280	1.93154e-92
ENDOD1	1.72774	1265.16	5.34071e-274	4.32001e-148	1	1.34183e-213	5.30721e-144
BRCA2	1.03369	1263.71	1.10384e-273	1	3.46548e-83	8.46441e-278	2.72504e-32
ONECUT2	1.71937	1251.64	4.57102e-271	3.71544e-85	1.39423e-219	3.11651e-235	1
CDH13	1.5945	1250.44	8.3446e-271	1.19851e-240	1	9.28279e-99	9.09179e-124
PPP1R3A	1.73198	1248.75	1.94219e-270	1.39144e-175	7.10172e-207	1	3.6906e-111
ELF3	1.65613	1247.98	2.85368e-270	8.89613e-101	2.05017e-274	2.28986e-125	1
KIFC1	1.06317	1245.95	7.85925e-270	1	5.79324e-69	4.90628e-275	2.14443e-54
SPOCK2	1.73111	1240.9	9.79202e-269	6.62325e-175	2.53283e-253	6.36436e-227	1
ABCA7	1.72519	1217.39	1.23859e-263	6.44718e-140	2.03494e-209	1	1.79041e-130
CTHRC1	1.68331	1215.78	2.75669e-263	3.55896e-224	1	8.99733e-128	1.59726e-118
SULF2	1.03642	1209.62	6.00738e-262	4.90199e-18	1	5.40881e-244	0.000956832
LCN1	1.73164	1208.3	1.15814e-261	1.73604e-168	1	2.00056e-205	1.06485e-106
FAM111B	1.62825	1208.13	1.26475e-261	1	1.90155e-231	8.76146e-200	2.9461e-82
ARSI	1.69961	1207.24	1.96486e-261	7.38341e-105	1	1.68248e-231	4.11407e-124
SLITRK4	1.73008	1201.67	3.18353e-260	1.29041e-158	1	2.40165e-210	9.59158e-108
ATP1A2	1.43139	1196.15	5.02023e-259	9.7101e-06	2.54026e-198	1	7.19447e-115
PRRX1	1.69125	1195.39	7.32076e-259	1.52661e-205	1	6.93787e-126	2.0413e-136
MESP1	1.63515	1193.36	2.01919e-258	1	1.54714e-222	1.23787e-66	2.00123e-152
LIMCH1	1.54702	1192.83	2.63817e-258	7.46255e-251	1	1.01957e-78	7.97465e-85
FGG	1.732	1188.69	2.08237e-257	1.31603e-202	5.74008e-225	7.33083e-219	1
ABRA	1.72714	1185.08	1.26586e-256	2.85419e-177	1.40336e-179	1	6.98359e-114
PLVAP	1.73171	1180.07	1.54768e-255	3.48305e-169	1	1.92294e-192	4.68347e-110
C7	1.63052	1170.75	1.62312e-253	7.42915e-208	1	1.43751e-35	3.4051e-130
CHGA	1.7196	1166.73	1.2144e-252	1	8.78491e-207	1.0476e-205	2.17203e-99
AP002954.2	1.7313	1166.26	1.53692e-252	1	2.37833e-204	7.10739e-201	4.00768e-114
CCN1	1.29292	1163.46	6.21047e-252	1.88148e-245	1	1.1579e-93	1.6668e-12
ITGA2	1.19218	1162.69	9.13481e-252	1	4.30801e-169	4.64506e-228	1.00899e-31
IKBIP	1.69066	1161.2	1.92008e-251	3.7662e-198	1	4.76198e-137	7.57945e-124
DDC	1.73203	1157.61	1.15612e-250	1.51343e-194	1.94452e-217	8.03343e-217	1
ADAMTS8	1.69314	1154.01	6.97823e-250	1.46413e-110	2.13011e-183	1	6.00436e-156
ARSJ	1.72639	1153.59	8.60974e-250	2.65712e-142	1	5.71761e-188	4.84978e-132
SDF2L1	1.53723	1152.36	1.59269e-249	1	9.31134e-104	2.07092e-217	3.24599e-156
AC107068.2	1.7316	1147.56	1.75155e-248	3.15019e-160	7.28458e-186	1	2.06522e-108
MAP4K4	1.58698	1147.46	1.83737e-248	3.4966e-129	1	2.99185e-234	8.69225e-48
PDZRN4	1.73037	1147.1	2.20283e-248	1.56241e-152	1	3.67873e-205	3.33375e-93
TAFA4	1.62229	1146.79	2.57346e-248	1.60838e-170	1.21361e-130	1	1.51706e-150
INCENP	1.3871	1140.75	5.24618e-247	1	1.15133e-108	8.75055e-254	1.27315e-65
MFAP4	1.65558	1139.99	7.65672e-247	1.10656e-150	1	5.4025e-123	1.80549e-174
SLC28A2	1.7318	1128.49	2.39464e-244	2.05869e-178	1.98607e-215	5.67114e-215	1
CA2	1.46253	1127.34	4.25164e-244	1	2.53959e-129	1.89777e-244	1.12787e-44
HMOX1	1.08181	1124.48	1.78231e-243	3.24562e-08	1.75197e-50	3.56474e-78	1
CAVIN2	1.72382	1119.37	2.27922e-242	1.51375e-177	1	7.80605e-157	1.48453e-113
RAB32	1.65485	1118.81	3.02569e-242	5.67011e-144	1	1.34808e-214	5.17546e-63
HELLPAR	1.23914	1118.15	4.20685e-242	1	1.35436e-88	9.47096e-249	7.98e-40
SERPINA5	1.73098	1116.19	1.12084e-241	7.52927e-160	2.58581e-213	6.0612e-219	1
GPBAR1	1.72997	1114.51	2.58768e-241	1.01313e-168	1	1.08176e-174	3.56849e-101
LINC02802	1.70367	1109.88	2.61736e-240	2.44358e-203	1	1.22929e-135	1.12715e-92
H2AFX	-1.67003	1103.67	5.8141e-239	9.49392e-238	2.51027e-91	1	3.19838e-47
LIPA	1.61027	1096.91	1.70102e-237	1.8686e-25	1	1.26783e-208	2.65282e-107
NKAIN4	1.48902	1095.19	4.02624e-237	1	4.95463e-142	3.4598e-233	1.17727e-62
TMEM176A	1.70118	1092.23	1.76767e-236	6.90888e-188	1.61648e-138	1	9.45288e-101
BTG2	-1.66873	1084.61	7.92997e-235	1	4.46272e-147	5.04883e-175	3.70361e-163
LEPR	1.6732	1083.24	1.57653e-234	2.57191e-203	1	3.27747e-121	1.02399e-92
HGF	1.73151	1081.22	4.31217e-234	1.34799e-139	1	2.4212e-191	5.9876e-96
MGST2	1.5923	1078.34	1.82432e-233	5.70103e-204	2.54116e-149	1.80807e-61	1
TXNDC5	1.02455	1074.39	1.30969e-232	3.35805e-13	1	8.05176e-108	1.0767e-78
SLC7A11	1.2402	1072.73	2.99549e-232	1	6.13371e-70	1.60407e-232	7.62065e-81
FTCD	1.7267	1071.91	4.52018e-232	8.45104e-192	2.11379e-210	7.77757e-171	1
NUAK1	1.54764	1071.68	5.07313e-232	2.8324e-223	1	2.47471e-96	8.86979e-67
SERPINI1	1.66999	1069.47	1.533e-231	3.74592e-73	6.40455e-234	1	2.63804e-53
MECOM	1.67623	1060.91	1.1029e-229	1.0273e-34	1	3.9435e-211	1.11419e-97
MIR4435-2HG	1.62348	1060.71	1.21434e-229	1.10302e-199	1	2.42664e-47	3.4593e-110
LIMS1	1.6953	1060.62	1.27019e-229	4.4457e-83	1	7.54972e-216	2.73871e-91
GJA5	1.71848	1059.36	2.38992e-229	1.98028e-156	1.19867e-156	1	1.00679e-107
CAV1	1.6196	1056.88	8.25453e-229	3.80963e-11	6.47369e-169	1	1.28539e-126
PKHD1L1	1.732	1054.63	2.54043e-228	8.53398e-146	1	6.10727e-177	1.23565e-96
KCNIP2	1.72876	1054.07	3.34983e-228	1.92208e-127	9.14379e-176	1	5.42263e-113
LUCAT1	1.72982	1051.24	1.37628e-227	3.44652e-151	2.51891e-167	1	7.42586e-97
GHRH	1.72875	1046.87	1.22195e-226	1.31865e-150	4.29292e-164	1	9.18211e-100
AC044810.2	1.40633	1045.88	2.00099e-226	1	1.39551e-167	5.67828e-189	3.19955e-24
CRIM1	1.70938	1043.47	6.67087e-226	6.56857e-123	1	8.22766e-200	1.39934e-78
ZMAT3	1.60537	1042.49	1.09223e-225	2.39086e-181	2.15708e-116	1	6.09516e-107
KIF14	1.14299	1034.78	5.11923e-224	1	9.59153e-71	4.83549e-229	1.57234e-61
BEX1	1.61889	1026.34	3.48107e-222	3.82695e-225	2.85776e-142	1.02862e-130	1
KNL1	1.11964	1023.28	1.60309e-221	4.29801e-22	1	1.20261e-116	2.71238e-14
UACA	-1.67183	1022.72	2.11546e-221	1	8.18406e-208	4.03806e-117	1.90837e-108
SMIM6	1.73196	1015.59	7.46163e-220	2.47049e-173	3.22521e-187	2.72664e-190	1
TM4SF4	1.7319	1013.99	1.66171e-219	2.73122e-177	3.74076e-187	5.36538e-186	1
SHISA3	1.60386	1007.08	5.25119e-218	9.1078e-85	1	4.55213e-218	3.10342e-36
HES7	1.71447	1006.17	8.251e-218	1	1.42257e-198	9.29392e-133	3.18378e-106
TMEM71	1.7014	1003.87	2.60551e-217	3.81998e-166	8.27264e-124	1	2.87765e-104
RSPO2	1.7246	1002.28	5.75853e-217	3.33888e-152	1	8.98027e-152	2.78237e-96
MYDGF	1.44638	995.928	1.37582e-215	8.76506e-28	1	1.97766e-218	9.23918e-35
DEPDC1	1.04163	994.191	3.2757e-215	1	2.35472e-54	1.21422e-213	2.00926e-69
UGT3A1	1.6906	994.091	3.44269e-215	4.88151e-118	6.25047e-136	6.60023e-221	1
CGA	1.73192	994.049	3.51608e-215	1.09581e-170	5.86413e-185	1.67819e-183	1
LGALS3	1.4289	991.417	1.30935e-214	8.96391e-191	8.21035e-121	1	9.72236e-57
RXRG	1.07294	989.698	3.08984e-214	7.65267e-157	1.13802e-09	1	9.64484e-106
FAM83D	1.46737	985.897	2.06257e-213	1	3.44178e-107	3.21644e-216	1.39878e-58
COL25A1	1.71643	982.847	9.46485e-213	8.33933e-80	1	1.49417e-184	1.10082e-107
ITGA3	1.69722	978.526	8.19358e-212	2.24353e-152	1	1.75751e-100	8.74226e-130
CCN2	1.40434	970.212	5.21257e-210	3.08324e-216	1	8.39135e-44	1.26778e-21
GUCY1A2	1.38649	969.757	6.54099e-210	2.30316e-204	1	3.16792e-22	5.07588e-46
CDKN1A	1.56337	968.241	1.39485e-209	2.2336e-141	6.12949e-98	1	6.4846e-136
DNAJC22	1.57912	965.748	4.844e-209	8.16167e-152	2.06371e-49	6.24242e-160	1
FABP1	1.73202	964.399	9.50497e-209	1.65204e-163	1.60696e-179	1.60696e-179	1
HIST1H3F	1.36944	960.429	6.90392e-208	1	1.74872e-82	6.84505e-214	3.79304e-53
BGN	1.7034	955.969	6.40735e-207	7.53337e-94	1	1.9536e-196	3.7863e-62
MEG3	1.56996	950.389	1.03996e-205	4.22912e-34	2.05104e-181	2.50353e-103	1
CXCL12	-1.69737	946.337	7.87064e-205	1.31037e-191	3.06387e-113	4.93914e-164	1
UBE2J1	-1.62045	944.981	1.54914e-204	1	1.53876e-164	3.00544e-169	2.85537e-37
GNG11	1.70489	944.522	1.94852e-204	2.35284e-44	1	6.8966e-147	4.13819e-144
FLI1	1.73181	940.915	1.18077e-203	1.52067e-130	1	8.24968e-160	1.35887e-81
EPAS1	1.68408	939.799	2.06103e-203	5.56407e-159	1	2.01918e-140	4.71871e-66
ARAP2	1.70844	939.78	2.08061e-203	1.34627e-145	1	4.22784e-153	5.67525e-69
MOXD1	1.69101	929.986	2.77202e-201	1.25046e-164	1	1.12019e-101	1.46548e-95
IL32	1.50275	927.726	8.57071e-201	1.02877e-119	1	1.53289e-178	3.53707e-43
CALCB	1.69342	927.512	9.53605e-201	1	1.10944e-160	1.58213e-168	4.82178e-70
ADAM9	1.22605	914.519	6.27798e-198	6.3685e-183	1	3.19695e-08	1.34092e-32
TXNRD1	1.68759	913.87	8.67771e-198	1	3.17126e-141	6.97317e-140	3.34566e-130
SLC7A7	1.47947	913.229	1.19577e-197	9.94915e-130	3.51573e-24	3.32755e-124	1
HSPB6	1.37445	910.855	3.91293e-197	1.85961e-145	4.57072e-29	1	3.56364e-120
ARHGAP22	1.70214	910.181	5.47804e-197	1.47684e-69	1	1.03565e-189	4.5101e-69
MYH9	1.66394	903.319	1.68706e-195	1.28506e-160	1	1.80674e-111	9.36163e-81
SC5D	1.67459	902.513	2.52328e-195	2.86178e-142	1.66763e-142	1	1.77711e-64
ITGA11	1.65092	901.966	3.31501e-195	1.50965e-135	1	3.67916e-158	5.13895e-45
TCEAL7	1.65582	898.364	2.00436e-194	1.91972e-82	1	6.71304e-109	2.26364e-153
CLDN11	1.50849	892.798	3.22993e-193	1	4.68177e-113	1.93887e-190	3.65886e-48
DPP4	1.70429	887.693	4.13446e-192	1.49537e-51	1.09043e-142	3.28761e-167	1
DDAH1	1.68261	887.056	5.68262e-192	2.79194e-82	1.83799e-140	1	2.35781e-120
KCNA5	1.26402	885.746	1.09328e-191	3.42826e-145	7.82093e-19	1	1.50993e-104
TYRP1	1.73198	885.244	1.40483e-191	1.12163e-123	1	1.88971e-147	9.78542e-80
TXNIP	1.13057	884.822	1.73427e-191	1.65351e-185	1	5.36049e-12	6.83561e-21
CCL2	1.72813	882.419	5.76077e-191	5.66219e-88	1	1.45701e-168	4.75019e-82
FREM2	1.42698	881.892	7.49448e-191	4.02498e-191	1.75636e-67	3.03165e-94	1
MIR122HG	1.73115	880.476	1.52043e-190	4.89421e-153	7.99229e-167	2.64067e-156	1
NTM	1.09513	877.96	5.33991e-190	1	4.74632e-36	3.95518e-174	1.27762e-80
THBS1	1.01984	877.818	5.73317e-190	2.4689e-104	1	3.98863e-06	1.47265e-49
OLFML1	1.70233	872.457	8.34092e-189	1.03484e-161	1	2.80337e-104	4.24882e-70
CCNF	-1.67051	869.856	3.05679e-188	7.0567e-193	8.07048e-50	1	1.51234e-29
S100A6	1.56334	866.821	1.39201e-187	6.50647e-135	1.34092e-91	1	1.90482e-110
ANO4	1.70677	863.871	6.07297e-187	1.64069e-125	1	1.10788e-115	2.00087e-104
DCLK2	1.38864	861.364	2.12459e-186	1.3139e-144	1	7.97907e-16	1.1038e-93
SCRG1	1.66532	859.322	5.89046e-186	2.77691e-151	1	3.34045e-89	3.49903e-92
TNNT1	1.02549	858.624	8.34708e-186	2.03052e-05	1.82692e-23	8.779e-72	1
KNSTRN	1.23745	847.626	2.02691e-183	1	3.68899e-56	2.23501e-181	2.55586e-69
REXO2	1.54255	846.054	4.44573e-183	8.63106e-34	1	4.44075e-138	1.87221e-120
AKR1B1	1.19202	842.226	3.00746e-182	9.4537e-06	2.98379e-70	1	1.45481e-156
LCN15	1.68837	841.594	4.12295e-182	1.58569e-155	4.81309e-93	1.6674e-159	1
NMB	1.34501	841.457	4.41443e-182	1	4.21058e-132	2.1665e-87	6.97976e-140
EPS8	1.54643	839.456	1.19934e-181	1.24715e-107	1	3.34074e-39	5.39712e-142
DACH1	1.43808	839.05	1.46901e-181	1.17449e-174	6.82168e-78	1	2.25842e-44
PURPL	-1.68258	832.889	3.18527e-180	6.57689e-160	7.10094e-79	1	8.7945e-72
ME1	1.6893	830.207	1.21586e-179	7.5834e-87	3.15473e-131	1	1.12821e-106
APLP1	1.67863	828.703	2.5775e-179	8.33694e-136	1	3.08553e-76	4.00265e-106
C3orf70	1.72806	826.026	9.81103e-179	2.46839e-124	1	6.86393e-124	3.91756e-81
PDX1	1.73191	823.35	3.73388e-178	2.45125e-140	8.53864e-154	3.63794e-151	1
F2R	1.51503	817.394	7.30851e-177	7.77727e-17	1	3.93332e-176	1.85644e-22
PELO	1.70211	815.363	2.01476e-176	8.7528e-67	1	2.8335e-124	1.11639e-121
SRPX	1.36584	811.611	1.31209e-175	4.15634e-121	2.12631e-47	1	4.15634e-121
COL11A1	1.6784	808.641	5.78271e-175	4.38233e-40	1	1.22539e-137	4.31914e-110
HAS2	1.32886	808.419	6.46064e-175	3.16906e-60	1	4.3769e-164	3.58445e-05
RAB11FIP1	1.67331	805.139	3.32448e-174	4.07714e-116	1	6.43327e-142	3.77658e-51
HAVCR1	1.73185	803.15	8.97688e-174	9.25519e-137	8.29367e-150	1.06603e-147	1
SDC2	1.63468	801.78	1.77907e-173	2.87681e-143	1	5.56204e-75	1.455e-87
AC131094.1	1.73002	799.996	4.33538e-173	1	9.54257e-137	7.36898e-142	3.05466e-73
TNFRSF9	1.71014	795.549	3.99548e-172	4.58635e-89	1	6.52715e-144	4.61244e-78
RCN3	1.6224	794.028	8.5394e-172	5.51186e-18	1	1.65338e-150	3.68091e-76
COLEC11	1.71329	787.703	2.01002e-170	1.48072e-134	1	1.14036e-104	1.86227e-70
HIST1H3D	1.05701	785.822	5.14251e-170	0.00408321	1	3.65048e-122	0.0058992
GABRA2	1.62395	783.552	1.59702e-169	1.0369e-112	1	7.74422e-142	2.34555e-34
CD48	1.72812	783.129	1.97327e-169	1	1.77071e-127	1.70776e-143	1.39929e-73
CD36	1.72897	779.388	1.2778e-168	4.98196e-114	6.30765e-125	1	3.25051e-66
ALB	1.73198	774.086	1.80376e-167	4.96923e-128	1.94181e-143	3.95591e-146	1
CEP55	1.04978	773.558	2.34811e-167	1.16136e-25	1	8.43842e-74	5.89398e-10
THSD7A	1.55122	766.702	7.20544e-166	6.47044e-153	1	1.02057e-46	1.53118e-67
JUNB	1.64473	766.574	7.68057e-166	4.7637e-138	1	2.32641e-56	1.36568e-87
LAYN	1.65239	763.371	3.80128e-165	2.3564e-35	1	6.48514e-160	4.55031e-59
AQP3	1.60262	753.839	4.43616e-163	7.50362e-128	1	3.14795e-118	1.09535e-32
ACTG2	1.73109	750.079	2.9007e-162	7.9536e-105	1	3.02871e-122	9.37621e-71
SMIM32	1.73147	747.383	1.11445e-161	4.87057e-121	2.23506e-137	1.18867e-143	1
SOX9	1.57871	744.325	5.13298e-161	1.56396e-50	1	1.57619e-163	1.04265e-32
AC093866.1	1.54156	742.765	1.11847e-160	7.51682e-05	1.55759e-63	4.48236e-102	1
HK2	1.68557	742.298	1.41187e-160	2.01617e-27	2.37013e-140	1	3.92971e-79
LGI2	1.03759	735.779	3.66101e-159	4.29331e-56	3.70279e-31	0.00574628	1
PRR11	1.26111	734.857	5.8e-159	0.000168795	1	2.66574e-110	1.74007e-12
LOXL1	1.59403	734.229	7.93717e-159	4.89245e-148	1	2.24426e-81	3.44794e-37
KDELR3	1.50504	730.323	5.58003e-158	5.74349e-153	1	2.00815e-72	5.71734e-26
GREM2	1.05064	722.764	2.43154e-156	2.38172e-94	1	2.65069e-75	0.000112016
ACTN1	1.29505	722.037	3.49527e-156	1.16996e-54	1	2.89204e-21	7.79782e-147
SCG5	-1.64052	721.618	4.30844e-156	4.73091e-119	1.19855e-91	1	9.55908e-72
ADH1B	1.73191	719.781	1.07824e-155	7.10199e-123	1.54268e-133	1.61375e-132	1
KLK6	1.71926	712.241	4.65215e-154	3.36017e-87	1	4.08814e-135	1.45407e-49
AP1S3	1.18108	711.437	6.95222e-154	1	7.33517e-74	1.13115e-152	2.58435e-20
KCNE4	1.73192	711.397	7.09268e-154	1.39193e-100	1	9.14603e-114	1.56191e-68
LMCD1	1.60143	710.677	1.01599e-153	1.14139e-136	1	4.5864e-26	1.15963e-65
RDH10	1.42095	708.805	2.58634e-153	1.05454e-87	1	0.000185759	3.00373e-94
C19orf33	1.20993	708.682	2.75089e-153	1	2.11252e-147	1.30236e-84	6.14499e-19
MSGN1	1.73174	708.483	3.03736e-153	1	6.9058e-122	6.9058e-122	2.03612e-70
KISS1	1.68248	706.442	8.41676e-153	8.19993e-103	3.07231e-121	1	9.86822e-46
IL18R1	1.72402	706.164	9.66912e-153	4.08662e-82	1	1.90786e-126	4.10366e-68
HIST1H1C	1.61293	705.274	1.50833e-152	1	1.09604e-87	3.69514e-121	1.32667e-101
AC026688.2	1.73004	701.687	9.04115e-152	1.18461e-103	1	1.43565e-109	1.68287e-65
SLC7A4	1.718	701.683	9.0603e-152	2.53826e-112	1	2.12652e-95	7.24792e-71
CAVIN3	1.45047	697.72	6.55276e-151	2.56338e-14	1.69661e-87	1	3.7069e-117
C1orf198	1.03154	696.089	1.47938e-150	1.6056e-109	3.32572e-09	1	8.4975e-79
C11orf96	1.01159	688.224	7.50669e-149	9.1017e-96	5.88686e-05	1	6.86921e-83
HMCES	1.56118	686.996	1.3863e-148	1.8401e-102	1.33461e-57	1	9.16922e-99
RAB9B	1.68749	686.608	1.68237e-148	4.13523e-118	2.3114e-80	1	8.52407e-68
TACSTD2	1.72664	684.87	4.00652e-148	5.51864e-86	6.51412e-127	1.16736e-137	1
NNMT	1.72752	681.944	1.72661e-147	7.13731e-105	1	4.02464e-109	1.35991e-53
DHFR	1.72311	678.825	8.19505e-147	1	2.64275e-113	1.47044e-113	6.49589e-77
TFPI2	1.61606	675.84	3.63735e-146	1.37892e-05	1	2.58061e-82	3.82157e-41
PPP1R17	1.72646	674.867	5.91254e-146	1	1.40174e-106	1.06194e-126	9.34702e-62
ARG2	1.17025	671.012	4.05002e-145	1.06034e-30	1	3.1061e-20	1.5199e-54
SGK1	1.58151	671.003	4.0701e-145	7.49408e-36	1	5.87162e-149	1.09935e-25
ACSM3	1.39216	665.983	4.98937e-144	8.07018e-68	1.31983e-23	2.51117e-117	1
ALKAL2	1.49732	664.985	8.2119e-144	1.21202e-43	1	1.94525e-146	2.20268e-19
CALCRL	1.73135	663.166	2.03621e-143	6.86459e-92	1	7.54372e-109	3.23487e-62
GADD45G	1.32174	660.513	7.65467e-143	4.78087e-100	1	0.000779729	1.19036e-65
RASD1	1.08479	659.986	9.96038e-143	2.08323e-86	1	0.000126277	1.61912e-27
EPHB6	1.65316	657.348	3.71735e-142	1.06803e-45	2.6989e-72	5.20609e-141	1
MYL12A	1.06187	656.286	6.3165e-142	1.59498e-39	1	1.85244e-13	2.5461e-136
RASL10A	1.70459	656.278	6.34185e-142	8.12675e-54	4.11114e-118	1	1.72482e-75
CDH5	1.73183	649.177	2.1963e-140	3.7579e-90	1	3.99741e-107	8.13913e-60
SPON1	1.56643	646.282	9.32008e-140	8.49027e-86	1	7.95637e-61	1.70387e-101
EGR1	1.62492	644.785	1.9676e-139	5.06817e-45	1	1.59834e-141	3.62885e-20
SHH	1.70848	643.727	3.33673e-139	4.00739e-71	5.57557e-124	4.43515e-124	1
PLAU	1.56875	643.109	4.54258e-139	7.2102e-13	1	3.70941e-120	1.54088e-61
SLC5A7	1.72657	642.763	5.39983e-139	4.6752e-93	1	1.84083e-98	1.08414e-64
SEMA3C	1.22566	640.663	1.54041e-138	4.10436e-83	1	0.000186595	3.28434e-82
GDF7	1.72545	638.302	5.00693e-138	1.91644e-67	1	6.0064e-122	2.68162e-55
DPEP1	1.37836	636.225	1.41247e-137	5.92985e-24	1	8.4787e-139	7.09898e-10
HAMP	1.73029	634.227	3.82826e-137	1.22375e-90	5.35855e-104	1	6.33463e-53
SPON2	1.63877	630.47	2.49848e-136	9.13949e-50	2.01715e-55	5.51401e-136	1
FOS	1.62315	628.201	7.75639e-136	3.10588e-32	1	1.84304e-138	2.75129e-30
GJA4	1.47985	622.088	1.6404e-134	4.04412e-88	4.5718e-49	4.37405e-125	1
KCTD16	1.68343	621.5	2.19957e-134	3.35452e-104	1	1.97053e-95	7.061e-39
FOXC2	1.70102	620.756	3.18961e-134	1.53249e-99	1	3.8202e-67	2.74093e-76
KLB	1.72924	620.687	3.29988e-134	2.8944e-88	7.41996e-119	5.00178e-120	1
F2RL2	1.73155	618.769	8.59789e-134	3.02982e-85	1	1.03606e-104	6.60303e-54
HIST1H2BC	1.25777	617.53	1.59639e-133	1	3.90203e-47	3.67931e-136	2.8788e-39
RHOB	1.6533	614.314	7.94838e-133	3.48271e-110	1	2.38035e-82	3.11608e-44
BST1	1.73012	608.634	1.35436e-131	4.59812e-78	1	4.05615e-100	1.0556e-63
CUBN	1.72869	602.815	2.4728e-130	4.88556e-113	5.85498e-108	5.85371e-103	1
LINC00607	1.72037	598.152	2.53493e-129	1.50048e-88	5.37875e-87	2.50815e-128	1
MCAM	1.55039	596.893	4.75262e-129	1.26995e-46	6.13127e-81	1	5.51307e-97
RND3	1.33862	596.685	5.27204e-129	1	3.5642e-40	2.06997e-72	7.89587e-117
HIST1H2BG	1.66748	596.25	6.5522e-129	1	1.27001e-80	1.3733e-115	1.039e-63
SELENOP	1.72548	594.053	1.96202e-128	2.13371e-46	8.41494e-119	1.87334e-98	1
GPR22	1.72965	590.162	1.36823e-127	5.294e-87	4.08058e-92	1	1.82129e-52
STC2	1.31641	589.252	2.15491e-127	1	2.34631e-97	9.47059e-35	2.18431e-90
MANF	1.44629	586.913	6.92348e-127	0.000359996	1	1.72085e-98	1.13195e-55
PRKCB	1.60997	585.241	1.59532e-126	7.43476e-15	1	2.61374e-103	3.7209e-68
PROCR	1.66803	574.584	3.25863e-124	1.0216e-42	1	1.55458e-87	5.66967e-87
KRT7	-1.64142	574.206	3.9344e-124	2.89133e-125	1.07864e-17	1	1.2842e-20
KIF20A	-1.7177	572.914	7.49792e-124	7.22959e-120	3.48312e-55	1	3.085e-21
FGF7	1.20137	570.479	2.52801e-123	1.30232e-96	2.83997e-16	1	1.42112e-66
ZNF385B	1.43421	569.993	3.22224e-123	6.80834e-106	1	1.93762e-09	2.44252e-45
ONECUT3	1.73188	569.409	4.31297e-123	1.7692e-93	1.34305e-104	2.00934e-108	1
NPR3	1.68765	567.98	8.80133e-123	2.38779e-102	1	2.15459e-80	3.46151e-31
DLL3	1.63025	566.496	1.84605e-122	1	1.89505e-111	8.18993e-49	6.88652e-68
ATF3	1.68611	565.835	2.56757e-122	1.64748e-15	1	2.23328e-84	3.84198e-85
HSPA1A	1.61369	563.791	7.12357e-122	4.69813e-38	4.02694e-78	1	4.07956e-92
FJX1	1.62977	561.318	2.44726e-121	3.4181e-30	1	3.52946e-121	2.5483e-35
CAVIN4	1.479	559.035	7.64853e-121	1.26047e-15	1.82333e-122	1	1.40124e-14
SYP	1.73175	558.456	1.02126e-120	1	1.82926e-93	9.24515e-97	5.17347e-58
KIF18A	1.05704	557.017	2.09432e-120	3.75026e-10	1	1.91663e-68	4.14178e-05
PCLO	1.70312	553.303	1.33634e-119	2.76123e-25	1	1.02535e-109	1.74091e-53
CST6	1.66249	553.164	1.43245e-119	1	3.6046e-92	5.55087e-104	2.94761e-36
SQLE	1.46534	552.852	1.67353e-119	1	1.48039e-40	1.6601e-122	7.73002e-30
MGP	1.73103	552.472	2.02332e-119	4.85151e-79	1	5.44584e-89	4.61823e-51
TGFB3	1.5374	552.347	2.15371e-119	2.87897e-93	1	3.50896e-12	4.4236e-61
XRCC4	1.67385	550.199	6.29263e-119	3.16163e-45	6.01768e-76	1	2.25482e-87
MAP2	1.71173	547.173	2.84952e-118	1	9.41153e-79	1.61088e-106	1.23779e-52
ART5	-1.66548	545.557	6.38212e-118	2.28008e-118	5.39453e-15	1	4.13682e-19
ACE2	1.68864	542.41	3.06884e-117	2.19006e-86	5.00154e-69	1	1.10829e-57
ESAM	1.71732	542.304	3.23705e-117	1.28205e-82	1	8.18008e-94	2.19267e-25
CCBE1	1.4044	541.361	5.18217e-117	6.24083e-35	1	6.59281e-114	1.83717e-05
PBK	1.72348	538.692	1.96272e-116	2.11135e-19	1	6.25917e-109	3.24866e-46
TSPO	1.11356	537.882	2.94102e-116	1	6.38795e-29	1.77841e-86	4.75978e-84
CDK2AP2	1.54355	535.191	1.12642e-115	1	5.00402e-72	4.58972e-75	1.30909e-88
ALDH1L2	1.04082	533.664	2.41426e-115	1	1.51117e-12	2.9579e-84	3.93086e-67
SERPINE1	1.71653	531.238	8.10141e-115	5.36284e-90	1	8.63423e-68	2.73581e-51
SERPINF1	1.30182	528.012	4.05249e-114	1.11647e-95	1.75453e-24	2.27531e-13	1
SUGCT	1.65719	526.547	8.41691e-114	3.92207e-37	4.23686e-110	1	3.40623e-38
HERPUD1	1.38967	526.182	1.01e-113	1.52938e-106	1	2.07084e-13	1.61826e-34
DDIT3	1.36004	523.77	3.36609e-113	8.54367e-106	1	3.98662e-08	3.18125e-25
AC025171.5	1.7277	516.194	1.476e-111	1	1.23229e-89	1.85924e-90	4.76096e-46
DUSP14	1.63512	516.163	1.49914e-111	1.23604e-69	2.45293e-64	1	2.57774e-69
PAH	1.72639	515.988	1.63588e-111	4.39611e-63	3.61313e-100	1.79798e-99	1
STK38L	1.36399	514.027	4.35247e-111	1	1.28188e-53	3.48624e-75	7.94565e-90
SPOCK1	1.33133	513.398	5.956e-111	6.43226e-58	1.26154e-13	1	5.94106e-89
GEM	1.61262	512.096	1.1408e-110	2.73186e-74	1	1.7388e-44	3.18425e-76
SOST	1.73171	507.254	1.27844e-109	4.90922e-68	1	7.91994e-87	4.36499e-45
PAEP	1.73139	506.733	1.65779e-109	2.54776e-72	1	1.17704e-80	1.84243e-48
ITIH2	1.73139	505.729	2.73583e-109	1.94499e-89	3.09324e-94	1.94499e-89	1
SLITRK2	1.73189	502.353	1.47452e-108	1.43192e-66	1	6.17027e-85	3.13097e-47
LGI1	1.71926	502.208	1.58534e-108	8.18253e-68	1	6.17838e-91	1.41099e-34
PTPRE	1.36165	500.199	4.31985e-108	2.45079e-96	6.06948e-36	1	1.83325e-47
SLC6A4	1.72481	498.146	1.20326e-107	9.85179e-73	1.34798e-77	1	1.45664e-45
LMO2	1.70227	497.504	1.65783e-107	1.1234e-67	1	2.41111e-92	8.23356e-26
LINC00664	1.63417	497.291	1.8442e-107	1	1.27693e-69	7.89439e-102	6.91445e-36
AC073174.1	1.70204	493.954	9.74822e-107	7.27333e-64	1	4.41485e-93	1.13705e-29
MMP28	1.73149	493.536	1.2011e-106	1.75573e-69	1	1.35388e-81	3.94048e-44
AC006062.1	1.72603	493.348	1.31915e-106	2.96057e-76	1	9.01146e-72	3.14635e-48
CCL21	1.7149	489.911	7.3308e-106	3.4406e-78	1	3.04944e-65	3.58525e-51
ALDH1A2	1.55986	489.421	9.36143e-106	8.15481e-85	1	2.98591e-28	1.86925e-60
PLAC8	1.7123	488.279	1.65448e-105	1.89594e-49	1.9985e-92	1	9.07349e-44
LRRC17	1.69013	487.833	2.06695e-105	1.0811e-49	1	2.57856e-68	3.52675e-73
APLNR	1.17132	487.577	2.34917e-105	1	1.10965e-18	1.13988e-83	4.22329e-63
SLC2A1	1.55236	486.403	4.2185e-105	2.99006e-11	4.13231e-90	1	4.27617e-49
FRMD6	1.66854	485.324	7.22883e-105	1.51455e-51	1	3.72088e-96	6.64576e-35
CPNE8	-1.6902	483.007	2.29724e-104	1.70096e-89	5.76291e-65	1	1.86466e-22
ZNF385D	1.63906	480.888	6.61361e-104	1	4.47574e-57	8.04748e-93	2.11061e-57
CASQ2	1.73192	479.828	1.12218e-103	1.77401e-67	5.22812e-78	1	1.05051e-42
RACGAP1	-1.59149	478.212	2.51332e-103	3.93119e-100	5.70707e-41	1	1.66118e-07
PLG	1.73187	476.481	5.95985e-103	7.21147e-81	5.60667e-88	1.88087e-88	1
PLSCR2	1.56971	474.173	1.88589e-102	8.05863e-22	8.94729e-78	4.58528e-80	1
MXD3	1.56225	468.966	2.53345e-101	3.06946e-14	1	1.06038e-102	1.29352e-15
APOC3	1.73054	468.959	2.54295e-101	1.18616e-83	1.16419e-89	2.67911e-78	1
CEMIP	1.73085	466.058	1.08119e-100	2.45031e-66	1	9.14725e-75	4.06725e-44
HVCN1	1.00664	463.046	4.85866e-100	1	8.18012e-15	7.5266e-96	7.23159e-15
OXTR	1.7194	461.248	1.19182e-99	1.33157e-86	5.18671e-82	1.82293e-79	1
RAI14	1.6114	459.662	2.62882e-99	6.17377e-12	1	2.52944e-92	1.9095e-36
ADAMTS1	1.32325	458.469	4.76703e-99	1.65608e-65	3.18843e-19	1	4.91087e-70
ECM1	1.72029	457.699	7.00089e-99	7.58917e-79	1	1.03424e-58	3.88093e-42
WNT2B	1.71847	457.06	9.62662e-99	3.34462e-72	1	6.63571e-63	9.80963e-47
FSTL3	1.25012	456.7	1.1523e-98	2.97125e-75	2.08958e-11	1	2.77312e-54
SEMA3D	1.23741	456.684	1.16145e-98	9.48203e-42	1	1.18442e-87	0.00861504
CD34	1.71869	450.302	2.80383e-97	4.88832e-65	1	4.70004e-80	6.15352e-26
IL11	1.71385	448.352	7.41746e-97	3.34464e-48	1	4.91182e-88	1.6002e-33
LIPC	1.73182	448.266	7.74351e-97	1.72405e-76	1.11023e-83	5.62965e-82	1
NPHS1	1.73063	447.735	1.00907e-96	2.20028e-56	1	6.73218e-77	8.56544e-44
HPGD	1.52628	446.555	1.81812e-96	0.00656418	9.5616e-50	1.73253e-51	1
PECAM1	1.72646	445.229	3.52294e-96	7.26251e-66	1	2.27597e-75	4.72098e-32
MT3	1.56918	444.709	4.5679e-96	2.81554e-65	1.4588e-43	1	2.17921e-62
ANXA4	1.52898	442.253	1.55489e-95	2.17811e-87	2.95914e-25	8.23751e-19	1
NDRG1	1.25318	441.604	2.14968e-95	5.8373e-83	0.000535173	1	2.12062e-25
DNM3OS	1.73205	437.346	1.79851e-94	1.7058e-60	1	1.41483e-72	2.79674e-40
CYP51A1	-1.71214	437.025	2.11034e-94	4.40714e-78	2.44921e-86	5.36216e-64	1
NRK	1.65589	436.183	3.21197e-94	3.68379e-22	1	9.3117e-84	7.06327e-47
SRPX2	1.72486	432.779	1.75473e-93	1.07214e-61	1	8.10223e-74	4.30739e-34
POSTN	1.69297	432.425	2.09432e-93	1.56856e-76	1	5.77601e-39	8.04813e-49
SERPINA4	1.73174	425.625	6.22577e-92	3.3555e-73	4.76566e-80	1.09692e-76	1
GBP2	1.72627	425.297	7.33047e-92	1.9372e-66	1	3.53973e-62	1.63539e-40
EMCN	1.73144	422.929	2.3895e-91	1.03122e-62	1	2.93792e-65	1.79375e-40
CD177	1.70335	421.383	5.16573e-91	1	5.57359e-62	6.51249e-84	7.39952e-34
CXCL3	1.62014	421.166	5.75531e-91	1	1.01e-52	4.80678e-88	1.27819e-34
GABRP	1.48267	420.075	9.92147e-91	1	5.44259e-72	1.7609e-77	7.53798e-26
PAX1	1.73198	419.223	1.51764e-90	2.23717e-67	1.91415e-78	1.22211e-79	1
NDUFA4L2	1.52424	417.933	2.88696e-90	1	1.57555e-87	3.65586e-42	2.72931e-40
ICAM1	1.48816	417.696	3.24915e-90	1	2.90372e-27	4.51927e-86	6.21715e-41
ADH6	1.73178	414.869	1.33106e-89	8.15099e-69	1.61538e-78	1.92132e-76	1
TLR4	1.7318	414.199	1.85965e-89	2.29852e-57	1	2.15945e-68	1.14184e-38
WNT8A	1.46661	412.634	4.05852e-89	1	2.14609e-70	3.56335e-72	2.20897e-12
SELENOM	1.18513	412.07	5.37906e-89	1.57619e-12	1	0.00565993	4.91984e-85
RBP7	1.60666	411.172	8.41797e-89	7.93057e-10	2.14841e-66	1	1.50197e-54
RIMS1	1.59932	411.148	8.51634e-89	5.05003e-33	1	1.27106e-88	8.33481e-21
GLRX	1.27718	409.843	1.63347e-88	1.65427e-86	3.75543e-37	1	3.96742e-18
COX7A1	1.69742	409.187	2.26521e-88	1.16836e-23	2.20243e-73	1	2.89584e-50
DDIT4	1.19734	403.395	4.07202e-87	6.9068e-06	1	1.98741e-44	4.07877e-23
DUSP1	1.44798	398.905	3.82218e-86	5.24128e-62	1	4.08869e-66	7.12372e-09
TRIB3	1.66956	394.016	4.37917e-85	3.74131e-16	1	2.93216e-78	2.37386e-37
2023-03-04	1.71363	393.916	4.60285e-85	3.22802e-41	1	2.61129e-71	3.22802e-41
CCDC198	1.73197	391.564	1.48763e-84	6.46688e-66	1.96549e-74	4.57705e-71	1
RNASE1	1.35129	383.85	6.9677e-83	3.69112e-54	2.34105e-15	5.00354e-61	1
ADAMTS5	1.69249	383.283	9.24733e-83	2.89839e-43	1	4.89304e-56	5.37929e-53
TNFSF15	1.73129	382.698	1.23777e-82	1.6612e-59	1.16557e-69	1.70501e-75	1
FIBIN	1.49666	377.423	1.71878e-81	1.72614e-67	1	1.50865e-19	5.81036e-44
SPX	1.52377	377.371	1.76336e-81	6.07078e-59	1	1.17588e-07	1.85287e-46
SHCBP1	1.15755	375.792	3.87628e-81	1	2.31128e-18	5.50238e-63	2.03524e-54
TFAP2A	1.69447	373.681	1.11068e-80	5.00237e-31	3.38294e-63	6.41862e-75	1
IDI1	1.47206	373.168	1.43435e-80	2.40641e-13	2.12455e-41	1	6.1117e-70
AKR1B10	1.72667	373.155	1.4434e-80	1.06955e-55	1	1.42795e-61	1.61745e-29
HOXC8	1.732	371.783	2.86191e-80	7.0098e-51	1	2.9616e-62	1.90185e-34
ECSCR	1.71839	368.844	1.23895e-79	2.71356e-17	1	3.19901e-71	5.66719e-39
FGF1	1.53933	368.59	1.40606e-79	3.59014e-64	2.57324e-23	1	7.16327e-45
PCDH8	1.73037	367.432	2.5054e-79	9.25819e-51	1	1.3312e-62	8.3556e-32
RFPL2	1.7291	361.456	4.93059e-78	1	3.67056e-63	5.33087e-63	5.88928e-33
CXCL6	1.58399	358.152	2.56139e-77	0.00433657	1	4.14725e-65	4.59096e-27
ITGA4	1.58087	355.133	1.15396e-76	2.18545e-12	1	3.04977e-65	1.80381e-40
CRHBP	1.563	354.442	1.62849e-76	1.76724e-64	1	8.45831e-08	5.25788e-33
HEY2	1.55043	351.866	5.88324e-76	0.00257045	6.69769e-32	1	4.12137e-64
HBEGF	1.00424	349.299	2.1161e-75	9.98394e-21	1	0.000129784	2.98434e-39
LCP1	1.60309	345.717	1.26215e-74	4.8982e-67	2.31501e-33	1.19216e-59	1
ISG15	1.43143	343.878	3.15734e-74	2.02277e-16	1.9245e-36	1	3.78413e-66
TP53I3	1.56231	342.247	7.11893e-74	6.21203e-10	1.28499e-34	1	5.95371e-66
TENM2	1.69012	340.646	1.58172e-73	1.20569e-48	1	1.71835e-39	5.9695e-47
CCDC18	1.12716	340.234	1.94206e-73	1.13529e-06	1	1.30291e-41	1.59518e-05
NIBAN1	1.55431	339.749	2.47342e-73	3.34089e-26	1	2.33447e-29	4.12682e-67
TDO2	1.73003	339.741	2.48316e-73	6.60415e-59	3.81942e-58	5.26715e-66	1
BCL2A1	1.73129	339.23	3.20277e-73	1.58094e-49	1	4.43906e-54	1.20172e-31
SERPINA6	1.73169	338.673	4.22813e-73	7.70101e-59	6.02077e-65	3.65282e-59	1
SCGB1B2P	1.42316	336.982	9.82243e-73	6.78085e-16	1	6.49806e-20	3.74653e-16
TDRD15	1.73184	336.696	1.13314e-72	4.77972e-56	1.83938e-63	1.49923e-62	1
TMEM151A	1.72253	335.671	1.8891e-72	1.3218e-36	1	4.34246e-59	1.43251e-36
ITLN1	1.54847	332.967	7.27067e-72	2.03844e-59	1	1.04454e-48	2.16946e-10
FOXD1	1.40666	332.039	1.155e-71	1	8.59715e-22	3.29403e-59	3.38736e-47
NKX2-1	1.73195	331.855	1.26564e-71	3.49199e-55	1.40643e-61	1.07215e-62	1
GDF10	1.71239	328.033	8.50556e-71	3.16586e-53	1	1.63721e-42	5.8776e-35
TINAGL1	1.60124	326.796	1.57595e-70	1.04037e-53	2.51381e-30	1	4.77059e-41
CYP26C1	1.73138	326.379	1.93963e-70	1.25245e-44	4.70479e-62	2.70622e-64	1
PHOX2A	1.67952	321.13	2.65522e-69	1	1.18413e-49	3.30166e-63	8.69674e-24
TIE1	1.73159	320.357	3.90369e-69	1.05305e-36	1	7.11128e-59	7.26765e-30
NRN1	1.48523	319.939	4.80843e-69	1	4.09579e-65	2.57372e-42	9.36839e-10
SLC17A8	1.72785	317.247	1.83969e-68	3.15307e-45	1	5.28593e-52	3.55644e-29
C5orf46	1.56151	315.929	3.54806e-68	1.16078e-57	1.98461e-30	1	5.73628e-32
DYNLL1	1.43658	315.529	4.33138e-68	7.63772e-32	1	2.42657e-62	8.96414e-26
ADH1A	1.73191	315.246	4.98616e-68	4.55059e-53	2.65013e-58	2.2282e-59	1
TCIM	1.0624	314.611	6.84396e-68	1.06103e-32	0.00209444	6.36701e-37	1
MESP2	1.71932	310.9	4.35146e-67	1	2.95116e-55	4.57265e-53	3.44326e-29
GMFG	1.73157	309.952	6.98e-67	2.11989e-39	1	2.59446e-55	1.6677e-27
MAP3K7CL	1.66304	309.491	8.7813e-67	3.62602e-55	1	2.33919e-24	3.63997e-36
PNOC	1.72567	308.594	1.3734e-66	6.89606e-47	1	1.24354e-47	9.45838e-29
HLA-DPB1	1.44466	308.468	1.46221e-66	1	7.21236e-50	2.24471e-56	1.11531e-30
COL15A1	1.72573	308.309	1.58234e-66	1.3317e-48	1	1.88223e-43	2.39553e-31
LINC00957	1.71214	308.271	1.61325e-66	1.28037e-48	1.9843e-47	1	9.67051e-25
AGTR1	1.72429	305.26	7.23482e-66	1.73476e-51	9.55315e-51	3.244e-61	1
GLIPR1	1.67649	304.964	8.38307e-66	2.82504e-48	1	9.224e-49	9.13746e-23
UPK3B	1.72996	304.785	9.16591e-66	4.66596e-36	1	2.8581e-54	3.83753e-30
PDE4B	1.61095	304.153	1.25609e-65	6.37588e-42	1	4.0383e-22	5.60258e-49
BHLHE22	1.5728	303.694	1.57841e-65	1	5.3161e-53	1.26628e-54	2.07415e-13
NFKBIA	1.27429	302.112	3.47318e-65	8.95685e-18	4.6588e-07	3.25594e-50	1
TNFRSF11B	1.64511	300.79	6.71199e-65	1	4.2081e-38	6.68579e-63	3.60661e-25
TFF1	1.73124	300.692	7.04836e-65	9.01847e-53	2.62872e-54	3.72812e-56	1
CBLIF	1.73094	299.423	1.3263e-64	9.95304e-53	6.3879e-57	9.95304e-53	1
GABRB2	-1.70373	299.205	1.47865e-64	8.98912e-62	2.16935e-42	2.95362e-50	1
THBS4	-1.69074	294.169	1.81818e-63	4.20715e-50	1	4.60667e-46	8.51278e-10
INHBE	1.18938	294.085	1.89662e-63	0.000667441	1	4.23584e-34	1.01027e-17
ICAM2	1.73198	291.982	5.40814e-63	1.45988e-41	1	2.12501e-48	2.15425e-26
NCKAP5	1.71188	288.896	2.51628e-62	7.33774e-47	1	5.0732e-34	5.0732e-34
UCA1	1.73194	288.788	2.65552e-62	9.80354e-48	1.96108e-53	3.57144e-55	1
AL590004.3	1.67857	288.076	3.78725e-62	2.11571e-52	1.2123e-30	1	8.84028e-28
HULC	1.59404	283.616	3.49386e-61	6.8893e-55	5.8854e-23	1.12188e-45	1
SV2C	1.71963	279.711	2.44566e-60	9.2016e-44	1.43972e-41	1	2.17736e-25
GNRH2	1.72814	278.409	4.67944e-60	1.0812e-50	7.40791e-38	5.52994e-55	1
TM4SF18	1.31561	277.436	7.59643e-60	3.51362e-23	2.74971e-18	1.90407e-57	1
DIO2	1.71912	276.89	9.97042e-60	8.98849e-50	4.32356e-42	8.40504e-55	1
AARD	1.24466	276.663	1.11631e-59	6.58051e-32	3.33815e-16	1	6.20832e-50
CDKN2A	1.70239	272.351	9.56606e-59	5.38644e-40	1	2.94812e-47	4.16726e-19
GJD2	1.72437	269.943	3.17491e-58	2.16021e-41	3.98238e-39	1	5.90246e-27
EDN3	1.72186	268.501	6.51361e-58	4.40501e-27	1	2.32304e-50	4.40501e-27
ANGPTL6	1.73056	266.014	2.24833e-57	1.10243e-37	1	9.92582e-42	9.48819e-28
GIMAP4	1.73123	265.609	2.75093e-57	6.32201e-36	1	1.06902e-43	4.96309e-27
COLEC10	1.72941	264.47	4.85142e-57	1.01669e-39	1	9.37533e-41	8.45599e-26
POU4F1	1.38074	263.649	7.30087e-57	2.75103e-44	1	3.90533e-13	1.90262e-34
PHF19	1.37588	261.779	1.85349e-56	0.00343242	1	3.31365e-22	7.66277e-29
AC245041.2	1.61477	260.347	3.78149e-56	5.17214e-52	1	5.91896e-09	5.23777e-21
AKR1C1	1.14991	260.056	4.37295e-56	1.07904e-44	1.01961e-05	1	8.21601e-28
GDF15	1.68216	259.266	6.48056e-56	7.73831e-18	1.79814e-29	2.0094e-55	1
NGFR	1.56048	259.203	6.68523e-56	2.01002e-07	1	2.41568e-36	9.49352e-42
SIX6	1.7319	257.744	1.38321e-55	1	3.53547e-44	3.59676e-45	8.50813e-26
THBD	1.66712	257.532	1.53712e-55	1.73647e-27	1	4.54399e-53	1.31567e-13
SPRR2F	1.73199	253.903	9.36713e-55	1.1014e-35	1	4.20788e-42	5.95326e-24
KIAA1211L	1.71465	252.862	1.57297e-54	3.97688e-29	1	1.00943e-48	5.17448e-20
LINC01088	1.46445	251.648	2.87939e-54	8.36111e-47	4.63628e-16	1	2.19296e-27
ALKAL1	1.08823	250.531	5.02277e-54	1	3.89099e-41	7.49875e-41	0.000436053
MMRN1	1.72978	250.108	6.19997e-54	4.78768e-38	1	5.55402e-41	2.57166e-20
SOX7	1.71893	248.546	1.34993e-53	6.69978e-19	1	1.04858e-50	6.33881e-22
USP18	-1.68293	247.042	2.85446e-53	1.82487e-48	1	2.10673e-25	5.90537e-20
HPCAL4	1.71263	245.604	5.84288e-53	3.86462e-23	1	8.34418e-47	6.73479e-25
TAL1	1.72479	245.009	7.85717e-53	7.79569e-23	1	2.19279e-46	1.852e-25
SAMSN1	1.71664	243.356	1.78971e-52	5.25414e-16	1	4.78555e-48	6.88272e-25
SULT1E1	1.65511	241.182	5.28212e-52	1.79718e-40	1.25101e-18	2.61152e-44	1
AVP	1.66377	236.883	4.4925e-51	1.55216e-08	7.60846e-36	1.88845e-38	1
CBLN2	1.58765	236.572	5.24654e-51	2.56898e-42	1	1.3218e-17	3.6466e-28
MVD	-1.64357	233.604	2.29883e-50	2.45322e-51	2.91188e-20	2.91188e-20	1
SLC26A2	1.27484	230.133	1.29406e-49	2.42953e-47	1.24641e-15	1	3.50137e-18
ERG	1.64447	228.861	2.43826e-49	0.00641504	1	7.29163e-39	6.18765e-24
LAPTM5	1.72416	228.674	2.67621e-49	1.95127e-31	1	1.2542e-41	2.68748e-16
FCN3	1.73116	226.554	7.68893e-49	1.08294e-26	1	7.65957e-42	5.54274e-21
NR1H4	1.73116	226.512	7.85127e-49	1.6464e-32	1	3.56003e-38	6.28577e-20
PROK1	1.73201	226.159	9.35964e-49	5.31987e-31	1	2.16287e-38	2.27612e-21
NPTX1	1.7115	225.91	1.05945e-48	1	1.19647e-35	5.70742e-43	1.95108e-21
ADGRL4	1.6992	224.595	2.03927e-48	3.41153e-29	1	1.59683e-43	1.36939e-10
AHSG	1.73188	224.24	2.43316e-48	2.8791e-39	6.40089e-41	3.0275e-42	1
SHE	1.72813	224.226	2.44953e-48	6.09389e-34	1	8.47275e-37	8.58607e-19
GRIN2B	1.60369	224.115	2.58923e-48	2.27587e-40	2.27698e-22	1	1.04824e-23
SCG2	1.72779	224.073	2.64317e-48	2.4541e-31	1	4.78885e-39	9.36855e-19
NT5E	1.5698	220.02	1.98763e-47	2.2633e-29	1	1.12838e-39	0.00120964
MGLL	1.65358	217.517	6.91117e-47	1.12805e-35	8.39078e-18	1	5.02138e-29
ERP27	1.6679	215.76	1.65678e-46	8.78144e-34	2.6124e-17	6.41363e-42	1
DIPK2A	1.06048	215.657	1.74381e-46	1	2.11467e-12	5.67206e-38	8.70041e-31
BTNL9	1.7199	215.639	1.75974e-46	1	1.83354e-35	6.55233e-40	1.03781e-20
MYCT1	1.64501	215.215	2.17326e-46	2.95363e-06	1	1.28088e-45	2.09308e-13
VAMP5	-1.61539	215.085	2.31756e-46	1	1.32804e-33	1.12461e-42	4.36373e-11
PDE7B	1.72661	213.142	6.09697e-46	1.13302e-32	1	3.19165e-33	4.42742e-20
EBF1	1.72725	213.142	6.09822e-46	3.68204e-24	1	7.23768e-39	1.29124e-21
BDKRB1	1.71532	212.421	8.72691e-46	9.46904e-24	1	4.86727e-38	7.87147e-23
LEFTY2	-1.55697	209.405	3.91592e-45	7.12693e-31	5.97998e-05	2.70501e-24	1
GUCA2A	1.73191	206.742	1.47314e-44	2.87669e-34	3.10863e-39	3.10863e-39	1
MMRN2	1.72898	205.439	2.81789e-44	1.03399e-26	1	9.24286e-37	1.60594e-18
PTGDS	1.47772	203.345	7.98618e-44	3.1656e-29	4.51054e-29	6.31384e-07	1
ART4	1.72461	201.62	1.88402e-43	5.48877e-32	1	5.48877e-32	7.75623e-17
CPM	1.54984	198.841	7.50776e-43	9.78881e-33	1.59008e-33	2.6954e-12	1
SSUH2	1.73181	198.737	7.90954e-43	1.06107e-34	8.32616e-38	2.8401e-36	1
APOC2	1.73182	197.546	1.43012e-42	6.87896e-33	1.33903e-37	2.20453e-37	1
GIMAP8	1.7309	197.423	1.52063e-42	9.04442e-29	1	2.52889e-33	3.69906e-17
TAC1	1.69194	196.889	1.98344e-42	1	7.70437e-29	3.08701e-39	2.21761e-18
TF	1.72386	193.158	1.26856e-41	3.11021e-39	3.47348e-34	1.63089e-25	1
AC239799.2	1.17724	192.391	1.85856e-41	1	3.81143e-26	1.96644e-39	1.31257e-06
NEB	1.54802	191.302	3.19462e-41	3.4505e-06	2.71547e-39	1	2.64225e-15
ADCY4	1.7311	189.085	9.62047e-41	1.19708e-25	1	1.19275e-32	6.14014e-18
SERPINA3	1.71409	188.906	1.05195e-40	8.75751e-35	1.16315e-28	2.61389e-37	1
TNNT3	1.69802	187.558	2.05607e-40	3.85413e-32	1.52501e-22	1	7.58412e-20
EMP1	1.65841	186.04	4.37611e-40	3.10039e-30	1	2.60411e-30	6.47628e-13
NRG1	1.54391	185.51	5.69523e-40	2.21422e-15	4.15951e-14	2.13318e-39	1
RGCC	1.62923	181.627	3.92765e-39	1.19359e-23	9.04345e-22	2.27567e-40	1
SYT4	1.23446	181.514	4.15486e-39	9.32081e-10	1	3.44047e-13	6.46033e-05
LPL	1.05789	180.873	5.71381e-39	1	1.33043e-38	7.25792e-10	1.46934e-13
S100P	1.73091	180.597	6.55601e-39	3.75541e-33	6.1937e-33	3.75541e-33	1
SCIN	1.36664	179.098	1.38137e-38	7.05588e-32	2.80766e-05	1	1.87106e-19
MDM2	1.05803	178.702	1.68154e-38	1	2.15184e-29	4.02283e-32	5.10936e-05
PLA2G2A	1.70131	177.675	2.80222e-38	1	1.67505e-25	3.31834e-36	1.20612e-15
TMEM100	1.52806	176.657	4.64794e-38	3.72012e-27	1.19785e-08	1.64206e-28	1
CD93	1.72829	175.174	9.71931e-38	2.2188e-26	1	1.37313e-27	2.23082e-17
APOA4	1.70265	175.017	1.05097e-37	7.80196e-28	3.32429e-31	1.6919e-11	1
S100A3	1.65441	173.845	1.88141e-37	2.74186e-28	1	3.46793e-29	8.14302e-10
XIRP2	1.3937	172.747	3.24862e-37	1	5.01476e-34	8.8774e-10	2.76847e-19
ZG16	1.73173	171.126	7.27012e-37	2.42858e-30	1.53759e-31	2.66482e-32	1
MSMO1	-1.72549	170.758	8.73005e-37	2.31513e-34	1	8.84146e-20	1.63167e-10
ACSS1	1.71792	168.256	3.02768e-36	1	6.63951e-28	6.8268e-30	6.12857e-19
GPRC5A	1.32138	167.887	3.63815e-36	7.16231e-35	1	0.000185858	4.56182e-10
NRAP	1.58586	165.818	1.01746e-35	3.0825e-25	4.56863e-29	1	4.19907e-05
CA7	1.72382	165.464	1.2132e-35	1	2.33568e-29	1.30477e-27	1.65011e-18
NUPR1	1.70982	164.494	1.96457e-35	1.20554e-12	1	3.7537e-29	1.11676e-21
APCDD1L	1.03703	163.779	2.8019e-35	1	1.34398e-10	1.13588e-28	1.39393e-24
TNR	1.73179	163.267	3.61526e-35	1.71833e-22	1	2.30721e-28	2.71342e-15
CD44	1.03644	162.853	4.43968e-35	1	0.000527862	4.55945e-24	1.62177e-22
DIRAS3	1.18597	162.511	5.26326e-35	9.9915e-26	0.000527987	1	9.03817e-21
TRBV30	1.73131	158.698	3.49967e-34	1.18882e-25	3.02134e-30	5.89325e-31	1
WNT4	1.3412	158.503	3.85634e-34	1	1.24165e-10	4.88472e-35	2.69175e-05
OXT	1.72277	156.877	8.6498e-34	1.68096e-19	1.18415e-27	2.65123e-33	1
LHX9	1.73167	156.429	1.08082e-33	4.51625e-22	1	2.68854e-26	1.79198e-15
REN	1.72891	155.876	1.42278e-33	1.55647e-24	1	1.15271e-23	1.468e-15
ADI1	1.18902	155.384	1.81613e-33	1.34101e-06	6.04077e-06	1	8.4702e-35
NEFH	1.7123	154.732	2.51086e-33	1	3.22626e-22	3.18983e-26	1.93258e-22
OLR1	1.73117	152.309	8.36684e-33	6.74343e-23	1	5.28457e-25	3.22302e-14
WNT6	1.72542	151.469	1.27027e-32	1.07055e-24	5.41577e-24	4.32079e-32	1
MCEMP1	1.7311	151.357	1.34273e-32	7.67384e-22	9.37475e-25	1	9.24093e-15
OIT3	1.71622	149.758	2.97097e-32	1.44452e-25	1	2.67962e-18	7.02139e-17
AL391844.1	1.70734	149.462	3.44223e-32	3.0186e-23	9.92056e-22	1	7.06787e-16
CILP	1.66674	148.869	4.62004e-32	7.43085e-27	1	5.41672e-14	2.02715e-17
PENK	1.72746	147.996	7.12911e-32	1.92541e-17	1	1.09166e-25	3.62232e-17
AC010251.1	1.67051	146.741	1.32975e-31	2.11498e-24	6.64839e-18	6.95585e-31	1
FMO1	1.72595	144.649	3.75789e-31	8.74043e-26	8.58693e-25	8.68516e-29	1
APCDD1L-DT	1.47436	140.192	3.43561e-30	1	1.32217e-11	7.89959e-24	7.34393e-23
IGKC	1.37323	139.615	4.57648e-30	6.4507e-26	1	1.40482e-06	8.50408e-16
CDKN2B-AS1	1.71247	139.556	4.71161e-30	1.59705e-17	1	2.24038e-26	4.79825e-12
AC012645.1	-1.67004	138.851	6.686e-30	5.39661e-30	8.32869e-13	1	1.38884e-06
ETV2	1.69581	138.308	8.7545e-30	2.1836e-19	1	2.5856e-16	1.32236e-20
AL358613.1	1.72838	137.977	1.03189e-29	1.69382e-19	2.28011e-27	4.03696e-27	1
CPA4	1.63495	137.756	1.15162e-29	4.87294e-28	1	6.39925e-08	1.66592e-12
HOXD11	1.73163	136.631	2.01287e-29	3.69265e-19	1	5.1347e-23	5.04e-14
AL157396.1	1.6847	135.632	3.30504e-29	1.14408e-18	1	3.84604e-26	6.79758e-07
TPPP3	1.63242	133.032	1.20117e-28	5.43043e-29	3.16778e-16	2.82143e-11	1
ASCL1	1.72912	132.483	1.57717e-28	1.18665e-18	1	1.77812e-23	7.8095e-12
AL953883.1	1.64943	129.698	6.28399e-28	2.17722e-23	7.1788e-17	1	8.61345e-12
TMEM196	1.72447	129.58	6.66189e-28	1.45377e-12	1.40368e-24	1.6248e-25	1
F8	1.6204	128.226	1.30411e-27	4.06144e-22	1	8.712e-21	3.22546e-07
LYPD1	1.59591	127.951	1.49526e-27	0.00318563	2.13089e-18	4.62383e-18	1
CFH	1.73129	127.786	1.62232e-27	3.83069e-19	1	5.79133e-21	1.27149e-12
SPATA16	1.72859	127.198	2.17238e-27	1	3.76071e-20	9.88959e-24	1.31081e-14
SST	1.52962	126.858	2.57131e-27	1.33232e-05	1	5.47927e-28	7.31854e-08
APOH	1.73205	126.405	3.21824e-27	5.3584e-22	3.30893e-24	3.30893e-24	1
SERPIND1	1.52226	125.81	4.32339e-27	1.68907e-19	1.62119e-20	1.54693e-06	1
AL627171.2	1.63137	120.275	6.73271e-26	2.28624e-12	2.17608e-26	8.85082e-11	1
ADH1C	1.73205	118.965	1.28925e-25	8.93928e-21	7.6062e-23	7.6062e-23	1
C5orf66-AS1	1.71177	118.021	2.05908e-25	5.78076e-21	1.38066e-19	3.5856e-24	1
FXYD2	1.36502	116.317	4.79288e-25	6.43852e-24	3.4692e-06	3.50429e-09	1
CLEC14A	1.72907	116.287	4.86507e-25	7.1813e-13	1	7.1333e-22	1.75205e-12
B3GALT2	1.22465	115.792	6.21546e-25	4.01973e-22	0.000165866	1	7.59511e-12
MRC1	1.72995	115.788	6.22862e-25	8.11798e-16	1	2.90298e-19	3.80345e-13
LINC00958	1.65987	114.763	1.03547e-24	2.19645e-05	9.42877e-18	3.4529e-20	1
QRFPR	1.29908	113.876	1.60718e-24	3.07219e-16	1.97337e-05	1	1.46019e-18
AC069185.1	1.65522	113.092	2.37084e-24	1	9.8594e-21	9.8594e-21	1.50862e-09
DLX5	1.71822	112.24	3.61637e-24	1.15256e-15	6.05043e-20	4.20361e-24	1
CYSLTR2	1.54776	112.037	3.99797e-24	1.03173e-23	1	2.23401e-12	2.9926e-05
GPR158	1.52289	111.772	4.55892e-24	1.3453e-16	1	2.99901e-12	8.88297e-17
FAM43A	1.503	111.361	5.5893e-24	2.27842e-14	1	1.00449e-05	8.99201e-20
APOL3	1.70397	111.218	6.00066e-24	1	8.16087e-20	4.95129e-21	7.92524e-08
CARD16	1.72503	110.578	8.24059e-24	2.73817e-17	1	2.2645e-18	4.65995e-10
PTGS2	1.71084	109.789	1.21823e-23	3.27694e-10	1	1.2401e-22	4.97459e-10
STXBP6	1.52071	108.647	2.14542e-23	1.3233e-20	1	2.33636e-11	1.77713e-11
ANGPTL3	1.72976	108.008	2.94473e-23	3.2096e-19	6.86514e-21	2.05743e-20	1
TRIM58	1.31912	107.857	3.17297e-23	3.03242e-09	1.79685e-06	1	1.28244e-22
PTGFR	1.61388	104.922	1.35788e-22	1.80342e-19	1	7.09871e-10	2.77586e-12
SNAP25-AS1	1.68564	104.61	1.58535e-22	5.23432e-23	2.09829e-16	1.11392e-14	1
ADGRF4	1.49317	104.443	1.72189e-22	2.59638e-16	1	9.49483e-19	0.00138384
PLCE1-AS1	1.65279	102.707	4.0685e-22	1.76985e-18	1	3.85631e-10	1.25426e-12
VSIG1	1.58839	102.432	4.66214e-22	1	7.80312e-19	6.18495e-19	1.20338e-07
CHODL	1.44761	101.926	5.98859e-22	1	3.16658e-22	4.08149e-13	2.24773e-08
CXCL1	1.48273	101.769	6.47438e-22	3.02989e-09	1	2.64506e-22	2.44538e-06
DLX6	1.72743	99.9586	1.58632e-21	2.74779e-14	4.54764e-20	6.105e-20	1
IL33	1.69675	98.9607	2.59987e-21	3.11092e-08	1	4.44386e-20	2.69731e-10
GBP1	1.69991	97.4453	5.50464e-21	2.87028e-17	1	7.36797e-13	2.31875e-10
SLC2A5	1.73046	95.5518	1.40515e-20	1.25616e-16	9.14133e-18	3.02261e-19	1
CFTR	1.42674	95.5052	1.43795e-20	7.1212e-15	0.00176714	9.59554e-13	1
TCN1	1.72149	94.5362	2.32271e-20	5.12307e-18	3.05732e-18	6.84054e-17	1
AC009403.1	-1.70528	94.3818	2.50703e-20	1.08814e-19	1	2.40493e-11	0.00046962
GP2	1.73203	93.543	3.79669e-20	8.07134e-17	2.60129e-18	1.14348e-17	1
SUCNR1	1.73162	93.0932	4.74301e-20	4.81293e-14	1	1.69416e-15	1.09219e-09
ASPN	1.65336	92.716	5.71626e-20	5.90439e-16	1	1.38949e-08	1.07902e-12
GKN1	1.73205	92.3763	6.76238e-20	1.87941e-13	1	4.8959e-16	2.67928e-09
ACTBL2	1.72586	91.6346	9.75985e-20	4.55907e-14	1	6.08582e-15	1.05389e-09
GC	1.72151	91.1392	1.24698e-19	4.93122e-11	5.08271e-18	1.72047e-18	1
GPNMB	1.55511	89.8723	2.33337e-19	0.000136088	1.21379e-15	1	5.99114e-13
AC025839.1	1.73058	88.4469	4.72187e-19	4.95567e-14	9.71385e-18	9.71385e-18	1
DNAJB1	-1.66035	86.2843	1.37551e-18	1.2629e-18	7.64326e-09	1	5.83303e-05
RUNX1	-1.67456	86.2574	1.39391e-18	2.36971e-14	4.56125e-11	1	1.165e-10
ADGRF5	1.73036	85.6485	1.88344e-18	1.62287e-12	1	2.72784e-14	1.31977e-09
C2orf80	1.71577	84.6568	3.07481e-18	1	6.54842e-15	3.53129e-16	5.49269e-08
LRRN3	1.46737	84.0409	4.16885e-18	2.3189e-18	1	2.2925e-08	6.17232e-05
BHLHE40-AS1	1.70713	84.0215	4.20895e-18	1	1.64753e-15	6.19363e-15	5.93167e-09
POU2F3	1.71864	83.1995	6.31825e-18	1	1.9309e-15	1.9309e-15	1.86193e-07
CD3D	1.71087	82.5787	8.58608e-18	9.51702e-15	2.90121e-10	2.68696e-17	1
GYPB	1.65157	82.5757	8.59919e-18	2.40024e-06	1	1.21075e-18	4.68166e-05
KLK5	1.59503	82.2671	1.00151e-17	0.000122463	1	3.96857e-16	6.20285e-10
IGFBP1	1.7221	82.0044	1.14034e-17	1.25111e-14	6.45681e-14	3.28123e-17	1
CEACAM6	1.73205	81.7717	1.27928e-17	1.17222e-14	4.94951e-16	4.94951e-16	1
UBD	1.73205	81.7717	1.27928e-17	1.17222e-14	4.94951e-16	4.94951e-16	1
AREG	1.64663	81.2319	1.67021e-17	2.90023e-14	0.000215823	6.1565e-12	1
CHI3L1	1.67194	80.7057	2.16598e-17	1.0932e-13	1	4.86452e-14	0.000151452
GUCA2B	1.73132	80.6645	2.21055e-17	9.43228e-15	3.14225e-15	5.94306e-16	1
LINC02532	1.72783	79.6344	3.67671e-17	5.94772e-15	3.54996e-16	1.17774e-13	1
CHL1	1.67597	78.8533	5.40733e-17	1.31315e-09	2.40493e-11	4.31051e-18	1
IL1RL1	1.52414	78.5743	6.2059e-17	0.000441693	1	2.98469e-16	4.0885e-08
PCDH12	1.71287	76.8944	1.42242e-16	1.18467e-12	1	7.15739e-13	5.32088e-07
ROBO4	1.72397	74.4229	4.8172e-16	1.14813e-07	1	4.21203e-15	1.14813e-07
HSD3B2	1.68856	72.7219	1.11495e-15	5.22622e-12	1	2.66476e-10	5.68595e-09
DKK2	1.67694	72.5287	1.22648e-15	1.10208e-11	1	5.02163e-13	1.72332e-05
LINGO1-AS2	1.72945	71.6625	1.88027e-15	2.55641e-11	1.89296e-11	1	7.29028e-08
CCDC144NL	1.01169	70.858	2.79585e-15	1	0.000176776	6.72928e-16	9.92065e-05
LINC02717	1.70906	69.1156	6.60109e-15	1.45174e-14	3.63715e-12	3.42e-12	1
AL662844.4	1.72288	69.0913	6.68064e-15	5.54741e-09	1.01247e-11	1	5.54741e-09
FGF3	1.64038	67.6907	1.33242e-14	1	5.02766e-10	9.97339e-15	3.97624e-05
MAB21L4	1.73124	67.0812	1.79921e-14	6.16499e-12	8.03066e-14	1.05616e-12	1
ORM1	1.73205	66.8986	1.96858e-14	3.3309e-12	2.66835e-13	2.66835e-13	1
CCL15	1.73205	66.8986	1.96858e-14	3.3309e-12	2.66835e-13	2.66835e-13	1
TMEM233	1.24825	65.4287	4.06113e-14	1	4.18476e-07	6.06901e-14	5.77622e-08
CST5	1.56942	64.8308	5.4519e-14	0.000174525	3.37016e-09	1.34231e-13	1
AC002463.1	1.71847	64.6722	5.89497e-14	5.46057e-13	5.46057e-13	1.06762e-10	1
IL7R	1.62838	64.1394	7.66353e-14	8.28167e-09	1	7.10638e-13	6.54968e-05
LTB	1.69882	63.5928	1.00303e-13	0.000192555	2.24442e-08	1.39758e-13	1
DUOX2	1.65124	63.5542	1.02229e-13	6.21456e-11	6.21456e-11	1	4.22774e-05
MEOX1	1.72412	63.1812	1.22838e-13	4.99092e-09	1	9.85882e-12	2.02328e-06
CCDC146	-1.61534	63.08	1.29109e-13	1	5.47878e-05	3.06355e-14	1.80653e-05
AL731537.1	1.72758	62.1413	2.0495e-13	1	5.66825e-11	2.53221e-11	6.32068e-08
PRAP1	1.69286	61.9004	2.30752e-13	1.90121e-05	3.96542e-12	3.96542e-12	1
S100A8	1.7008	61.8149	2.40671e-13	2.03913e-10	1.31241e-09	1	1.22287e-06
KNG1	1.72593	61.6889	2.56063e-13	1.34019e-11	8.42388e-13	5.70963e-11	1
ISG20	-1.54262	61.4628	2.86194e-13	3.87721e-09	7.3335e-10	1	9.41572e-08
CPB2	1.73106	61.4519	2.87741e-13	5.06661e-12	5.06661e-12	5.06661e-12	1
PSKH2	1.70295	61.1004	3.42068e-13	3.94984e-08	1	3.94984e-08	3.72761e-10
GYPA	1.72291	60.7356	4.09331e-13	1.50724e-08	1	1.80083e-11	3.92319e-06
KRT17	1.6385	60.2764	5.13079e-13	8.37277e-05	1	1.08136e-13	0.000201472
DAND5	1.47038	60.2545	5.18656e-13	9.35522e-07	1	1.36707e-09	1.36707e-09
VTCN1	1.71787	60.2232	5.26687e-13	1.89635e-10	2.60389e-10	3.43607e-13	1
ANKRD45	-1.72403	59.1831	8.78534e-13	1	7.79946e-13	4.68035e-09	5.51006e-05
MFAP5	1.71121	59.1336	9.00152e-13	5.86911e-11	1	5.37542e-09	2.08438e-05
CLEC1B	1.72983	59.0979	9.16115e-13	1.78796e-08	1	1.84129e-10	6.14411e-07
FAP	1.73205	58.7463	1.08902e-12	6.69296e-09	1	1.89343e-10	2.70343e-06
CLEC2A	1.47787	57.937	1.62131e-12	0.00115997	4.49631e-13	1	0.00018041
MYH3	1.67438	57.5872	1.92559e-12	4.0559e-08	5.50215e-11	1	1.76427e-05
C15orf48	1.71663	57.2023	2.32667e-12	4.42491e-10	2.1508e-09	1.33578e-12	1
DUOXA2	1.63984	56.9716	2.60596e-12	1.05467e-10	2.00593e-08	1	4.18758e-05
AC025171.3	1.60681	56.3187	3.59199e-12	1	5.58216e-09	5.58216e-09	1.23927e-09
ATP1B4	1.72563	55.4479	5.51004e-12	2.7438e-09	2.96658e-08	1	1.00077e-06
LINC01013	1.6951	55.2296	6.13376e-12	4.67012e-10	1	1.35899e-08	2.42904e-05
ALDH1L1	1.67176	54.9628	6.99274e-12	0.000236672	4.98188e-12	1.11473e-07	1
AC139493.2	1.63312	54.9339	7.09279e-12	1.04571e-11	1	5.51962e-06	7.33989e-05
C3	1.46297	52.9152	1.9113e-11	0.00823714	0.00823714	5.99903e-10	1
TNFAIP6	1.68191	52.2399	2.66237e-11	0.000192329	1	9.79012e-11	2.84158e-06
AGR2	1.7205	52.1886	2.73035e-11	5.15881e-10	9.30632e-11	9.16668e-10	1
TFF2	1.73205	52.028	2.95422e-11	9.64004e-10	1.46502e-10	1.46502e-10	1
CXCL11	1.72624	51.3404	4.13969e-11	2.28693e-08	1	3.5906e-09	5.02604e-05
EGR4	1.70435	50.7717	5.47188e-11	3.79566e-08	1	1.13863e-09	0.000728059
PCDH19	1.47189	50.387	6.60825e-11	1	2.69967e-08	8.29472e-11	0.000362375
SFTA1P	1.26457	49.9387	8.23304e-11	1.04917e-06	7.66507e-05	1	2.90193e-09
APLN	1.08518	49.6906	9.29809e-11	1	0.000667859	8.83874e-06	5.92952e-11
KCNJ6	1.54167	49.2973	1.12757e-10	2.47127e-05	2.66147e-06	1	2.72377e-09
PADI2	1.35332	48.9008	1.36944e-10	1	6.99877e-07	4.17829e-11	0.000876576
NECTIN3-AS1	1.33403	48.708	1.50518e-10	5.68494e-10	0.000189915	1	1.70333e-05
ITGB6	1.67111	48.1318	1.99634e-10	6.16734e-10	9.95271e-10	5.42063e-07	1
LEAP2	1.73146	47.9603	2.17133e-10	6.32251e-05	4.14046e-11	7.54862e-07	1
AL713998.1	1.71994	47.0674	3.36279e-10	1.44139e-07	1	4.45069e-09	0.00149506
AP001885.2	1.65559	45.3565	7.77145e-10	1	3.0165e-09	2.4072e-08	0.000771633
AC105031.2	1.72912	44.2073	1.36368e-09	1.44111e-07	2.33194e-09	2.33194e-09	1
AC019117.1	1.73049	43.5495	1.88118e-09	1.75247e-08	3.80633e-09	1.75247e-08	1
MEP1A	1.72719	41.8698	4.2757e-09	4.25023e-07	3.65871e-08	2.85839e-09	1
CYP4B1	1.73153	39.9623	1.08532e-08	1.63768e-06	1.22834e-08	2.69105e-08	1
GADL1	1.46453	39.7772	1.18791e-08	7.03215e-07	2.62307e-08	0.000595104	1
ESM1	1.7234	38.5566	2.15467e-08	4.69624e-07	1	8.47344e-05	1.76729e-05
VIT	-1.64355	38.3855	2.34222e-08	7.78416e-09	0.00111476	1	0.00599697
C8B	1.72262	37.584	3.46181e-08	8.11002e-08	8.11002e-08	8.11002e-08	1
IGFL2	1.71199	37.2735	4.02732e-08	4.28323e-07	1	5.23521e-06	0.000812343
SFRP4	1.71964	37.1272	4.32486e-08	3.00831e-06	1	3.00831e-06	6.16667e-05
GALP	1.72443	36.48	5.92781e-08	7.62268e-05	1	7.45686e-08	0.00225172
CDH17	1.70885	35.9678	7.60684e-08	9.65615e-08	2.78997e-07	2.20322e-06	1
AC006040.1	1.56852	35.648	8.88792e-08	1	2.15051e-07	1.06335e-06	0.00162765
SELE	1.68	34.2579	1.74777e-07	9.29614e-06	1	1.34279e-06	0.00276501
LINC02732	1.66093	33.5988	2.40778e-07	2.99462e-07	3.33074e-05	6.04902e-07	1
HSD11B1	1.7312	32.8252	3.50605e-07	9.08549e-06	1	9.08549e-06	0.00030841
AC108075.1	1.73084	32.8252	3.50605e-07	9.08549e-06	1	9.08549e-06	0.00030841
MAGEA6	1.55819	31.7715	5.84718e-07	1	1.78618e-06	1.78618e-06	0.00304151
CXCL10	1.73205	31.4545	6.8191e-07	3.65868e-05	1	7.17452e-06	0.000818241
CCL7	1.73205	31.4545	6.8191e-07	3.65868e-05	1	7.17452e-06	0.000818241
VGLL2	1.71449	31.3502	7.17307e-07	0.000548471	5.77868e-06	3.10038e-07	1
LINC01674	1.70271	29.747	1.55991e-06	1	9.89025e-05	1.08119e-06	0.001212
SCEL	1.73161	29.6381	1.64444e-06	4.5427e-06	2.37463e-06	4.5427e-06	1
NOX1	1.71535	29.5289	1.73365e-06	2.13347e-05	3.82188e-05	1	0.00240048
WNT16	1.64846	28.8747	2.37942e-06	0.00359424	0.00536373	1.17008e-06	1
PDYN	1.64341	28.7686	2.50472e-06	0.00026974	5.92927e-07	0.000508405	1
NECTIN4	1.63705	27.122	5.5507e-06	0.00140793	1.93059e-05	3.01649e-06	1
CXCL2	-1.53003	26.8333	6.38072e-06	0.000687164	1.85149e-05	1	0.00219378
LINC02697	1.63908	26.5025	7.48477e-06	3.13494e-06	0.000198482	4.70202e-05	1
FCN1	1.61881	26.0768	9.1906e-06	0.00339583	3.23443e-05	1	0.0007442
DMRT2	1.72936	25.8998	1.00092e-05	3.53693e-05	9.29711e-06	9.29711e-06	1
CCL4L2	1.73092	25.763	1.06917e-05	0.000740901	1	3.50066e-05	0.00194567
TP63	1.73014	23.9912	2.50856e-05	2.72182e-05	2.72182e-05	2.72182e-05	1
LINC02805	1.72072	23.0996	3.84981e-05	0.000127516	1.8906e-05	0.000127516	1
C7orf69	1.73205	23.0628	3.91831e-05	0.000541252	1	0.000192684	0.00495982
AP003306.2	1.71847	22.922	4.19235e-05	1	0.000314517	4.13577e-05	0.00650195
HIST1H2AA	1.68168	22.7374	4.58062e-05	1	0.000104731	0.000511218	0.000900348
GIMAP7	1.72224	21.7937	7.20063e-05	0.00618911	1	0.000150364	0.0032854
SLC18A3	1.72979	21.6314	7.78255e-05	0.000910387	1	0.000682053	0.00251015
FYB1	1.6424	20.3334	0.000144766	0.000483263	1	0.00459604	0.00433331
CYP1A1	1.71157	18.0467	0.000430194	0.00030511	0.000578084	0.00223078	1
CALML3-AS1	1.5721	17.5644	0.000540863	0.00391497	0.00349593	1	0.00349593
CHRDL2	1.67115	17.2526	0.00062703	0.000471084	0.00078208	0.00452634	1
AC022537.1	1.61316	15.4025	0.0015031	0.00818488	1	0.00698613	0.00698613
CSAG1	1.69191	14.6842	0.00210742	1	0.00562805	0.00471675	0.00786619
ANXA13	1.7227	13.4341	0.00378596	0.00342969	0.00342969	0.00459735	1
