# Supplementary material for: Combined lineage tracing and scRNA-seq reveals unexpected first heart field predominance of human iPSC differentiation
Source: eLife. 2023 Jun 7;12:e80075. doi: 10.7554/eLife.80075 (PMC10348749; doi:10.7554/eLife.80075)
Supplement: Figure 4—source data 4. [file elife-80075-fig4-data4.xlsx]

## Sheet: Sheet1
Galdos_Seq_Run1	Hashtag Oligo Sequence
WTC-Day1	5P(BC),AAGCTCGTTGGAAGA
WTC-Day2	5P(BC),CGGATTCCACATCAT
WTC-Day3	5P(BC),GTTGATCTATAACAG
WTC-Day4	5P(BC),GCAGGAGGTATCAAT
WTC-Day5	5P(BC),GAATCGTGATTCTTC
WTC-Day6	5P(BC),ACATGGTCAACGCTG
SCVI111-Day1	5P(BC),ATGAGGAATTCCTGC
SCVI111-Day2	5P(BC),CATGCCAATAGAGCG
SCVI111-Day3	5P(BC),CCGTCGTCCAAGCAT
SCVI111-Day4	5P(BC),AACGTTAATCACTCA
SCVI111-Day5	5P(BC),CGCGATATGGTCGGA
SCVI111-Day6	5P(BC),AAGATGAGGTCTGTG
Galdos_Seq_Run2	Hashtag Oligo Sequence
WTC-Day0	5P(BC),AAGCTCGTTGGAAGA
WTC-Day7	5P(BC),CGGATTCCACATCAT
WTC-Day11	5P(BC),GTTGATCTATAACAG
SCVI111-Day0	5P(BC),ATGAGGAATTCCTGC
SCVI111-Day7	5P(BC),CATGCCAATAGAGCG
SCVI111-Day11	5P(BC),CCGTCGTCCAAGCAT
Galdos_Seq_Run3	Hashtag Oligo Sequence
WTC-Day13	5P(BC),GCAGGAGGTATCAAT
WTC-Day15	5P(BC),GAATCGTGATTCTTC
WTC-Day30	5P(BC),ACATGGTCAACGCTG
SCVI111-Day13	5P(BC),AACGTTAATCACTCA
SCVI111-Day15	5P(BC),CGCGATATGGTCGGA
SCVI111-Day30	5P(BC),AAGATGAGGTCTGTG
