# Supplementary material for: Combined lineage tracing and scRNA-seq reveals unexpected first heart field predominance of human iPSC differentiation
Source: eLife. 2023 Jun 7;12:e80075. doi: 10.7554/eLife.80075 (PMC10348749; doi:10.7554/eLife.80075)
Supplement: Figure 6—source data 1. — Pct1 and Pct2 represent the percentage of cells in cluster 1 and all other that express a particular gene. [file elife-80075-fig6-data1.xlsx]

## Sheet: Table 8
gene	p_val	avg_log2FC	pct.1	pct.2	p_val_adj	genes
FN1	3.79e-229	2.63481	0.757	0.438	1.39e-224	FN1
PRSS23	5.06e-265	1.6875	0.803	0.438	1.85e-260	PRSS23
COL5A1	6.67e-165	1.6794	0.706	0.459	2.44e-160	COL5A1
HAS2	0	1.62338	0.854	0.326	0	HAS2
CRABP2	2.35e-280	1.45389	0.918	0.671	8.61e-276	CRABP2
GPC3	1.76e-196	1.30195	0.596	0.223	6.43e-192	GPC3
SLC2A3	1.47e-194	1.26922	0.928	0.795	5.39e-190	SLC2A3
ID1	1.21e-124	1.24074	0.791	0.586	4.42e-120	ID1
PGAM1	0	1.23627	0.97	0.882	0	PGAM1
RPS10	1.23e-275	1.18841	0.967	0.805	4.52e-271	RPS10
PRDX4	4.48e-244	1.12839	0.914	0.726	1.64e-239	PRDX4
LDHA	2.17e-292	1.0987	0.99	0.979	7.94e-288	LDHA
PRDX6	4.89e-242	1.07888	0.975	0.948	1.79e-237	PRDX6
COL1A2	4.67e-98	1.04462	0.495	0.251	1.71e-93	COL1A2
ACTB	3.75e-170	1.04267	0.953	0.817	1.37e-165	ACTB
BMP2	1.2e-129	1.03419	0.659	0.362	4.38e-125	BMP2
TXNIP	2.74e-151	1.01594	0.715	0.39	1e-146	TXNIP
ENO1	1.51e-240	0.952809	0.994	0.992	5.51e-236	ENO1
PGK1	1.35e-208	0.928085	0.98	0.963	4.94e-204	PGK1
NPY	3.32e-253	0.92654	0.351	0.044	1.21e-248	NPY
SEC61G	1.74e-218	0.924876	0.957	0.844	6.37e-214	SEC61G
S100A11	1.64e-101	0.876668	0.708	0.498	6.01e-97	S100A11
ATP5MC3	9.38e-284	0.874797	0.994	0.978	3.43e-279	ATP5MC3
TSC22D3	4.08e-149	0.871419	0.672	0.352	1.49e-144	TSC22D3
LRRN3	2.84e-269	0.861392	0.361	0.042	1.04e-264	LRRN3
TMEM141	3.22e-147	0.861217	0.923	0.864	1.18e-142	TMEM141
ACTA2	7.56e-73	0.857566	0.82	0.652	2.77e-68	ACTA2
C4orf48	1.19e-171	0.854339	0.926	0.798	4.34e-167	C4orf48
BEX3	1.16e-224	0.848446	0.987	0.938	4.23e-220	BEX3
TUBA1A	1.48e-118	0.836376	0.902	0.767	5.4e-114	TUBA1A
IGFBP7	1.47e-47	0.835385	0.606	0.49	5.39e-43	IGFBP7
KCNQ1OT1	2.68e-107	0.807895	0.854	0.688	9.8e-103	KCNQ1OT1
PITX2	1.65e-98	0.801707	0.514	0.264	6.03e-94	PITX2
LTBP1	9.97e-52	0.789387	0.78	0.781	3.65e-47	LTBP1
AC068587.4	4.66e-68	0.787581	0.744	0.624	1.7e-63	AC068587.4
TSC22D1	6.44e-152	0.787134	0.945	0.87	2.36e-147	TSC22D1
COL2A1	7.55e-58	0.786691	0.887	0.9	2.76e-53	COL2A1
ANXA4	6.21e-133	0.751421	0.55	0.251	2.27e-128	ANXA4
TPI1	4.36e-214	0.7483	0.996	0.984	1.6e-209	TPI1
ATP6AP2	4.18e-111	0.746731	0.749	0.585	1.53e-106	ATP6AP2
APOE	3.81e-114	0.744601	0.973	0.943	1.39e-109	APOE
FAM162A	4.24e-135	0.743561	0.965	0.93	1.55e-130	FAM162A
NRP2	1.9e-42	0.7361	0.677	0.608	6.94e-38	NRP2
ACTG1	5.22e-121	0.731364	0.914	0.728	1.91e-116	ACTG1
SOD3	5.48e-91	0.723881	0.496	0.261	2e-86	SOD3
COX6A1	8.87e-192	0.716045	0.989	0.971	3.25e-187	COX6A1
EGR1	1.18e-125	0.714685	0.364	0.104	4.33e-121	EGR1
G0S2	6.49e-67	0.714296	0.461	0.25	2.38e-62	G0S2
CST3	4.73e-88	0.710491	0.786	0.671	1.73e-83	CST3
NDUFA4	6.82e-235	0.708067	0.997	0.979	2.49e-230	NDUFA4
LAPTM4A	1.55e-90	0.705159	0.774	0.675	5.67e-86	LAPTM4A
UQCR10	9.21e-206	0.703733	0.99	0.964	3.37e-201	UQCR10
HHATL	3.71e-99	0.700273	0.301	0.089	1.36e-94	HHATL
MDK	2.72e-147	0.699199	0.987	0.965	9.97e-143	MDK
TUBB4B	2.44e-109	0.699013	0.892	0.762	8.92e-105	TUBB4B
TIMM17B	7.32e-111	0.694521	0.811	0.681	2.68e-106	TIMM17B
ATP5MC1	5.58e-131	0.692839	0.961	0.929	2.04e-126	ATP5MC1
PPIC	1.44e-119	0.687198	0.904	0.824	5.27e-115	PPIC
HSPE1	8.99e-152	0.677689	0.98	0.929	3.29e-147	HSPE1
PABPN1	4.11e-104	0.675937	0.813	0.675	1.5e-99	PABPN1
SMOC1	2.49e-244	0.674624	0.276	0.023	9.13e-240	SMOC1
RSPO3	2.52e-71	0.66862	0.388	0.162	9.22e-67	RSPO3
WSB1	1.18e-114	0.668464	0.948	0.879	4.3e-110	WSB1
NDUFC2	8.49e-139	0.664666	0.944	0.874	3.11e-134	NDUFC2
C11orf96	8.18e-111	0.663719	0.404	0.144	2.99e-106	C11orf96
COX5B	5.81e-184	0.66226	0.99	0.975	2.12e-179	COX5B
PIP4P2	1.38e-71	0.661996	0.574	0.397	5.06e-67	PIP4P2
MICOS10	4.67e-132	0.660793	0.938	0.863	1.71e-127	MICOS10
SLC16A3	1.25e-95	0.654333	0.724	0.509	4.58e-91	SLC16A3
AC253572.2	1.67e-148	0.652931	0.313	0.064	6.11e-144	AC253572.2
WNT5A	4.14e-54	0.651427	0.528	0.38	1.52e-49	WNT5A
PFN1	2.7e-152	0.647178	0.985	0.947	9.89e-148	PFN1
RPS4X	1.55e-175	0.64683	1	0.986	5.67e-171	RPS4X
BAMBI	1.48e-68	0.646732	0.864	0.792	5.42e-64	BAMBI
SRSF9	4.69e-80	0.643619	0.705	0.569	1.72e-75	SRSF9
PRTG	1.39e-69	0.642835	0.661	0.512	5.09e-65	PRTG
KRT19	2.13e-76	0.634944	0.918	0.909	7.8e-72	KRT19
HIGD1A	1.71e-76	0.632841	0.775	0.688	6.26e-72	HIGD1A
SLIT3	7.44e-53	0.632044	0.614	0.498	2.72e-48	SLIT3
BEX4	4.4e-100	0.628895	0.886	0.809	1.61e-95	BEX4
ID3	1.23e-56	0.62572	0.826	0.756	4.51e-52	ID3
TNNI1	1.48e-160	0.625615	0.995	0.993	5.42e-156	TNNI1
ATP5F1B	1.07e-151	0.625604	0.979	0.971	3.91e-147	ATP5F1B
PGRMC1	2.03e-68	0.624628	0.654	0.529	7.44e-64	PGRMC1
MORF4L2	1.81e-106	0.618789	0.888	0.775	6.62e-102	MORF4L2
HLA-DRB1	4.23e-288	0.618652	0.297	0.02	1.55e-283	HLA-DRB1
TXNDC17	2.31e-81	0.617466	0.854	0.751	8.45e-77	TXNDC17
DOK4	3.29e-75	0.617261	0.838	0.733	1.21e-70	DOK4
COMMD6	1.84e-128	0.615799	0.952	0.917	6.73e-124	COMMD6
FGF8	1.65e-132	0.614564	0.327	0.081	6.03e-128	FGF8
VCAN	7.57e-58	0.609073	0.945	0.92	2.77e-53	VCAN
C4orf3	2.91e-108	0.6061	0.968	0.91	1.06e-103	C4orf3
HSBP1	1.04e-125	0.605231	0.952	0.885	3.81e-121	HSBP1
NDUFA8	3.76e-95	0.604184	0.882	0.818	1.38e-90	NDUFA8
SERPINH1	1.25e-90	0.604069	0.861	0.786	4.58e-86	SERPINH1
TMEM14B	3.38e-111	0.601523	0.943	0.894	1.24e-106	TMEM14B
COX6C	4.14e-164	0.599564	0.99	0.961	1.51e-159	COX6C
DDIT4L	3.21e-119	0.596211	0.328	0.092	1.17e-114	DDIT4L
H3F3B	1.22e-95	0.595026	0.956	0.916	4.46e-91	H3F3B
NDUFA12	7.9e-100	0.59393	0.918	0.846	2.89e-95	NDUFA12
PKM	4.34e-138	0.593179	0.979	0.976	1.59e-133	PKM
PRDX2	2.42e-156	0.592407	0.991	0.975	8.86e-152	PRDX2
HMGN3	3.37e-110	0.591657	0.934	0.895	1.23e-105	HMGN3
CRHBP	4.83e-97	0.589923	0.234	0.053	1.77e-92	CRHBP
FIBIN	1.06e-148	0.586845	0.23	0.032	3.87e-144	FIBIN
DUSP6	5.11e-56	0.585856	0.496	0.311	1.87e-51	DUSP6
DAD1	5.58e-101	0.585689	0.872	0.76	2.04e-96	DAD1
ECH1	2.27e-96	0.585207	0.89	0.835	8.29e-92	ECH1
NDUFB3	1.02e-89	0.58498	0.854	0.739	3.72e-85	NDUFB3
PRDX5	2.7e-136	0.583612	0.972	0.935	9.87e-132	PRDX5
COL22A1	1e-108	0.578878	0.472	0.173	3.66e-104	COL22A1
SPARC	5.17e-41	0.575308	0.673	0.577	1.89e-36	SPARC
INTS6L	2.7e-77	0.57484	0.614	0.383	9.87e-73	INTS6L
MAGED2	1.21e-78	0.566736	0.869	0.834	4.43e-74	MAGED2
SNCA	9.74e-78	0.564871	0.386	0.174	3.56e-73	SNCA
TCEAL8	1.16e-87	0.56357	0.871	0.769	4.24e-83	TCEAL8
RTL8A	1.5e-62	0.561685	0.698	0.59	5.5e-58	RTL8A
GSN	8.1e-38	0.561046	0.682	0.673	2.97e-33	GSN
SMAD2	1.43e-49	0.560897	0.701	0.619	5.22e-45	SMAD2
PDK1	1.23e-96	0.560465	0.956	0.931	4.5e-92	PDK1
MPC2	1.95e-64	0.558283	0.842	0.784	7.14e-60	MPC2
UQCR11	3.81e-126	0.557149	0.977	0.942	1.39e-121	UQCR11
SH3BGRL3	3.96e-53	0.55694	0.684	0.587	1.45e-48	SH3BGRL3
JPX	1.61e-71	0.555586	0.785	0.676	5.88e-67	JPX
MARCKSL1	5.85e-66	0.55436	0.84	0.775	2.14e-61	MARCKSL1
FAM89A	1.44e-64	0.553625	0.404	0.214	5.26e-60	FAM89A
SRSF5	4.59e-73	0.552191	0.836	0.763	1.68e-68	SRSF5
FDPS	4.75e-42	0.551836	0.742	0.674	1.74e-37	FDPS
BOLA3	1.1e-52	0.547586	0.662	0.541	4.03e-48	BOLA3
AC007952.4	5.96e-89	0.546881	0.328	0.113	2.18e-84	AC007952.4
ZNF428	9.23e-70	0.546735	0.783	0.695	3.38e-65	ZNF428
NGFR	5.7e-132	0.546604	0.231	0.038	2.09e-127	NGFR
PPP4C	3.52e-57	0.544319	0.592	0.464	1.29e-52	PPP4C
TIMP3	8.24e-42	0.542172	0.685	0.628	3.02e-37	TIMP3
CCDC80	6.99e-39	0.540374	0.587	0.451	2.56e-34	CCDC80
APOO	9.83e-70	0.538902	0.587	0.411	3.6e-65	APOO
RPS27L	1.96e-43	0.538666	0.804	0.752	7.16e-39	RPS27L
PYGM	3.31e-53	0.537157	0.601	0.468	1.21e-48	PYGM
SUB1	2.18e-90	0.534154	0.926	0.864	7.99e-86	SUB1
KCNG1	1.43e-89	0.53307	0.31	0.103	5.24e-85	KCNG1
FAM118A	1.08e-63	0.532084	0.516	0.318	3.95e-59	FAM118A
IER2	7.96e-39	0.531113	0.471	0.337	2.91e-34	IER2
FLNA	1e-45	0.530245	0.589	0.469	3.68e-41	FLNA
COX7B	2.57e-115	0.528023	0.986	0.963	9.39e-111	COX7B
NDUFS8	4.29e-83	0.527645	0.907	0.851	1.57e-78	NDUFS8
COX6B1	3.29e-149	0.526073	0.996	0.976	1.2e-144	COX6B1
RBX1	6.91e-99	0.525215	0.94	0.872	2.53e-94	RBX1
CPEB2	3.93e-55	0.523821	0.417	0.231	1.44e-50	CPEB2
SERF2	6.09e-146	0.52097	0.993	0.976	2.23e-141	SERF2
HSPA1A	2.43e-39	0.516585	0.493	0.346	8.91e-35	HSPA1A
ATP5PO	2.77e-99	0.515913	0.969	0.95	1.01e-94	ATP5PO
LSAMP	3.68e-128	0.513696	0.258	0.05	1.35e-123	LSAMP
DPP7	1.75e-42	0.511138	0.602	0.5	6.4e-38	DPP7
UBL5	1.72e-117	0.509645	0.981	0.942	6.31e-113	UBL5
CKB	3.05e-41	0.508666	0.832	0.802	1.12e-36	CKB
SRI	1.94e-41	0.508567	0.747	0.697	7.09e-37	SRI
NDUFB5	1e-89	0.507969	0.917	0.865	3.66e-85	NDUFB5
CHCHD2	1.4e-29	0.506548	0.412	0.266	5.14e-25	CHCHD2
ETFB	5.54e-85	0.505394	0.93	0.883	2.03e-80	ETFB
PCDH7	5.52e-49	0.503582	0.832	0.787	2.02e-44	PCDH7
PSMA6	3.09e-66	0.503224	0.828	0.774	1.13e-61	PSMA6
MYL6	3.07e-109	0.502508	0.998	0.989	1.12e-104	MYL6
STMP1	7.37e-52	0.50232	0.733	0.657	2.7e-47	STMP1
NDUFA2	8.21e-87	0.501579	0.931	0.869	3e-82	NDUFA2
GPC4	1.93e-47	0.49832	0.424	0.253	7.06e-43	GPC4
HAND1	5.49e-32	0.496277	0.627	0.51	2.01e-27	HAND1
NDUFB7	3e-78	0.494675	0.918	0.87	1.1e-73	NDUFB7
BANF1	6.03e-73	0.494511	0.872	0.813	2.21e-68	BANF1
ATP5F1C	5.75e-93	0.493982	0.953	0.936	2.1e-88	ATP5F1C
LY6E	6.75e-40	0.493104	0.55	0.447	2.47e-35	LY6E
MDH2	3.98e-76	0.492672	0.923	0.916	1.46e-71	MDH2
NTPCR	2.58e-48	0.491373	0.687	0.628	9.43e-44	NTPCR
MLF2	6.36e-63	0.491006	0.841	0.774	2.33e-58	MLF2
KRT10	2.77e-47	0.487739	0.741	0.67	1.01e-42	KRT10
NDUFAB1	1.44e-80	0.486415	0.923	0.877	5.29e-76	NDUFAB1
OST4	1.32e-91	0.485857	0.965	0.913	4.84e-87	OST4
LMO2	9.5e-91	0.485455	0.188	0.037	3.48e-86	LMO2
CLIC1	7.24e-55	0.483984	0.827	0.767	2.65e-50	CLIC1
HNRNPH1	1.68e-56	0.483542	0.792	0.715	6.14e-52	HNRNPH1
DYNLRB1	2.5e-62	0.483116	0.818	0.744	9.15e-58	DYNLRB1
PGM1	3.23e-55	0.48216	0.822	0.786	1.18e-50	PGM1
COX8A	6e-97	0.481013	0.972	0.947	2.2e-92	COX8A
GTF2H5	4.18e-52	0.480913	0.737	0.657	1.53e-47	GTF2H5
SEC61B	2.16e-62	0.480542	0.867	0.806	7.9e-58	SEC61B
NDUFA13	5.7e-106	0.480152	0.985	0.961	2.09e-101	NDUFA13
ITM2C	1.1e-28	0.479861	0.651	0.635	4.01e-24	ITM2C
KCNN2	1.18e-48	0.479785	0.362	0.198	4.31e-44	KCNN2
NIPSNAP3A	6.24e-41	0.479365	0.517	0.396	2.28e-36	NIPSNAP3A
GTF2A2	3.42e-53	0.478925	0.766	0.67	1.25e-48	GTF2A2
SLC2A1	1.86e-37	0.478704	0.736	0.654	6.81e-33	SLC2A1
SPINT2	9.41e-51	0.478626	0.792	0.74	3.45e-46	SPINT2
NAXE	1.5e-45	0.476429	0.63	0.547	5.49e-41	NAXE
TMSB10	2.52e-51	0.476112	0.965	0.914	9.23e-47	TMSB10
UBC	4.16e-76	0.47377	0.966	0.942	1.52e-71	UBC
SLC25A5	2.71e-84	0.473329	0.969	0.952	9.92e-80	SLC25A5
UQCRFS1	1.15e-72	0.472968	0.92	0.879	4.19e-68	UQCRFS1
SRP9	1.09e-56	0.471966	0.807	0.738	3.98e-52	SRP9
TMEM167A	4.43e-47	0.471941	0.78	0.739	1.62e-42	TMEM167A
PLD3	2.4e-55	0.471527	0.819	0.76	8.8e-51	PLD3
AP2S1	1.85e-54	0.469898	0.829	0.756	6.78e-50	AP2S1
CD63	1.9e-87	0.468873	0.98	0.948	6.95e-83	CD63
BAX	9.7e-33	0.468116	0.521	0.419	3.55e-28	BAX
GOLGA8A	2.11e-59	0.464934	0.454	0.252	7.73e-55	GOLGA8A
PSMB1	8.36e-74	0.464389	0.904	0.853	3.06e-69	PSMB1
IFITM3	1.32e-37	0.46435	0.8	0.795	4.82e-33	IFITM3
ERH	3.54e-72	0.464106	0.893	0.81	1.3e-67	ERH
OAZ1	7.27e-92	0.463874	0.973	0.936	2.66e-87	OAZ1
PLS3	2.85e-47	0.46216	0.677	0.573	1.04e-42	PLS3
TSPAN6	1.06e-47	0.462061	0.623	0.507	3.89e-43	TSPAN6
PPP3CA	7.06e-26	0.46157	0.482	0.409	2.58e-21	PPP3CA
CXCL14	1.26e-56	0.461401	0.144	0.034	4.6e-52	CXCL14
BCAT1	4.54e-24	0.461059	0.497	0.407	1.66e-19	BCAT1
ATP5PF	1.62e-107	0.460832	0.989	0.974	5.93e-103	ATP5PF
MZT2B	2.08e-71	0.459648	0.917	0.885	7.61e-67	MZT2B
H2AFY	7.05e-56	0.459397	0.899	0.879	2.58e-51	H2AFY
SRSF7	1.07e-44	0.458917	0.769	0.703	3.91e-40	SRSF7
HES1	1.5e-34	0.458461	0.371	0.239	5.49e-30	HES1
NUDT4	6.19e-53	0.457973	0.853	0.788	2.27e-48	NUDT4
BEX2	6.58e-22	0.457152	0.473	0.402	2.41e-17	BEX2
NINL	1.8e-43	0.456348	0.422	0.271	6.59e-39	NINL
CTNNB1	1.74e-49	0.455816	0.783	0.734	6.39e-45	CTNNB1
MGST3	3.38e-59	0.455675	0.954	0.929	1.24e-54	MGST3
HAPLN1	1.52e-44	0.455033	0.208	0.08	5.57e-40	HAPLN1
MDH1	1.29e-67	0.454651	0.964	0.949	4.72e-63	MDH1
MSMO1	7.64e-20	0.453597	0.549	0.498	2.8e-15	MSMO1
SF3B6	9.55e-60	0.453574	0.858	0.804	3.49e-55	SF3B6
HIKESHI	1.51e-44	0.452604	0.635	0.54	5.54e-40	HIKESHI
ISG15	1.23e-21	0.452307	0.483	0.413	4.5e-17	ISG15
GATD3B	1.79e-52	0.45162	0.44	0.261	6.54e-48	GATD3B
DGKI	8.22e-29	0.451245	0.64	0.555	3.01e-24	DGKI
CYCS	2.57e-67	0.451242	0.955	0.917	9.41e-63	CYCS
NDUFB2	1.9e-80	0.45117	0.962	0.928	6.95e-76	NDUFB2
PKDCC	1.77e-32	0.451039	0.483	0.376	6.47e-28	PKDCC
ANXA6	5.35e-49	0.450937	0.817	0.795	1.96e-44	ANXA6
BMPER	5.56e-48	0.450656	0.375	0.205	2.03e-43	BMPER
AIFM1	3.5e-45	0.450176	0.732	0.681	1.28e-40	AIFM1
TSPAN7	7.19e-112	0.450049	0.297	0.076	2.63e-107	TSPAN7
ABCA7	6.51e-39	0.448948	0.501	0.347	2.38e-34	ABCA7
AL021155.5	3.46e-20	0.448884	0.271	0.184	1.27e-15	AL021155.5
BSG	1.06e-68	0.447693	0.907	0.878	3.9e-64	BSG
LAMTOR5	4.33e-68	0.446274	0.896	0.853	1.58e-63	LAMTOR5
AAK1	3.33e-36	0.44333	0.717	0.671	1.22e-31	AAK1
C1GALT1	2.59e-13	0.442209	0.451	0.429	9.47e-09	C1GALT1
LAMTOR2	6.4e-48	0.441178	0.73	0.668	2.34e-43	LAMTOR2
CISD1	1.83e-53	0.438944	0.847	0.805	6.71e-49	CISD1
GPI	1.61e-57	0.438471	0.929	0.911	5.9e-53	GPI
FOS	1.4e-24	0.437258	0.377	0.26	5.11e-20	FOS
MYOF	8.34e-53	0.436877	0.348	0.175	3.05e-48	MYOF
PFN2	3.32e-33	0.435311	0.592	0.521	1.22e-28	PFN2
NDUFS5	8.01e-103	0.434944	0.986	0.965	2.93e-98	NDUFS5
CYP27A1	2.68e-55	0.434771	0.385	0.195	9.82e-51	CYP27A1
GUK1	1.59e-57	0.434706	0.856	0.818	5.82e-53	GUK1
KLHL4	2.68e-46	0.433595	0.338	0.176	9.8e-42	KLHL4
PSMB3	1.08e-55	0.433487	0.836	0.761	3.96e-51	PSMB3
OSTC	5.74e-55	0.433175	0.834	0.771	2.1e-50	OSTC
GPX4	8.77e-75	0.432297	0.953	0.939	3.21e-70	GPX4
FKBP1A	8.99e-44	0.426823	0.739	0.671	3.29e-39	FKBP1A
FTX	3.14e-47	0.42639	0.707	0.579	1.15e-42	FTX
LIFR	6.39e-19	0.426354	0.405	0.337	2.34e-14	LIFR
SEM1	1.55e-49	0.425184	0.804	0.739	5.67e-45	SEM1
AC239799.2	2.4e-89	0.422777	0.209	0.046	8.77e-85	AC239799.2
ALKBH5	3.2e-33	0.421532	0.665	0.616	1.17e-28	ALKBH5
ARPC3	1.44e-51	0.420985	0.83	0.76	5.27e-47	ARPC3
DUSP23	2e-32	0.420853	0.39	0.269	7.32e-28	DUSP23
KRTCAP2	9.2e-39	0.42078	0.789	0.74	3.37e-34	KRTCAP2
MYO6	2.36e-30	0.420711	0.446	0.326	8.65e-26	MYO6
KCTD12	3.99e-24	0.420453	0.651	0.538	1.46e-19	KCTD12
WNT11	1.38e-68	0.417363	0.329	0.135	5.07e-64	WNT11
C14orf119	4.73e-36	0.417253	0.553	0.464	1.73e-31	C14orf119
PSMB2	2.75e-37	0.415822	0.689	0.631	1.01e-32	PSMB2
ATP6V1F	9.39e-46	0.415536	0.792	0.75	3.44e-41	ATP6V1F
JUNB	3.44e-39	0.415383	0.266	0.13	1.26e-34	JUNB
ATP6V1G1	9.39e-49	0.415274	0.871	0.826	3.44e-44	ATP6V1G1
BRK1	1.58e-53	0.413124	0.893	0.861	5.78e-49	BRK1
NDUFS4	2.54e-41	0.412862	0.759	0.721	9.3e-37	NDUFS4
SUMO2	8.47e-69	0.412687	0.964	0.929	3.1e-64	SUMO2
ATP5IF1	4.62e-72	0.412309	0.965	0.942	1.69e-67	ATP5IF1
TMEM134	5.2e-35	0.412086	0.596	0.52	1.9e-30	TMEM134
BNIP3	2.53e-55	0.412069	0.972	0.966	9.28e-51	BNIP3
ADGRL2	7.28e-29	0.411814	0.384	0.273	2.66e-24	ADGRL2
PPP1CB	1.79e-51	0.410861	0.864	0.829	6.55e-47	PPP1CB
MRPL14	1.18e-44	0.410097	0.825	0.782	4.31e-40	MRPL14
SPAG4	1.57e-49	0.409629	0.333	0.161	5.76e-45	SPAG4
HDHD5	4.2e-34	0.409529	0.513	0.398	1.54e-29	HDHD5
S100A13	5.33e-31	0.408895	0.711	0.658	1.95e-26	S100A13
COX11	6.82e-37	0.40813	0.499	0.389	2.5e-32	COX11
DDT	4.07e-46	0.407186	0.88	0.86	1.49e-41	DDT
TMBIM6	1.62e-42	0.406895	0.815	0.797	5.92e-38	TMBIM6
SUMO1	2.45e-38	0.406609	0.751	0.692	8.98e-34	SUMO1
POMP	1.45e-60	0.406364	0.919	0.865	5.31e-56	POMP
RCN2	4.74e-33	0.406142	0.684	0.631	1.74e-28	RCN2
LSM4	1.55e-44	0.405333	0.827	0.762	5.67e-40	LSM4
TP53I11	4.26e-26	0.404138	0.467	0.382	1.56e-21	TP53I11
Z93241.1	8.96e-101	0.403556	0.229	0.048	3.28e-96	Z93241.1
NDUFB11	3.08e-61	0.402384	0.938	0.916	1.13e-56	NDUFB11
DGUOK	1.8e-30	0.402381	0.564	0.493	6.6e-26	DGUOK
ATP5MG	9.37e-94	0.402006	0.987	0.972	3.43e-89	ATP5MG
NOP10	2.45e-44	0.401368	0.842	0.788	8.96e-40	NOP10
GLRX	7.42e-17	0.401238	0.461	0.397	2.71e-12	GLRX
UQCRH	1.95e-81	0.400952	0.995	0.979	7.13e-77	UQCRH
FTH1	1.76e-58	0.400916	0.999	0.989	6.43e-54	FTH1
PSMA5	9.82e-40	0.400403	0.72	0.656	3.59e-35	PSMA5
SOD1	5.59e-56	0.400245	0.918	0.884	2.04e-51	SOD1
CYC1	1.05e-40	0.399866	0.818	0.782	3.84e-36	CYC1
SDCBP	5.18e-31	0.399134	0.651	0.598	1.9e-26	SDCBP
NDUFB9	3.88e-44	0.398831	0.906	0.883	1.42e-39	NDUFB9
TXN	7.77e-40	0.398057	0.812	0.738	2.84e-35	TXN
ATP5MF	5.36e-67	0.398038	0.976	0.936	1.96e-62	ATP5MF
SLC16A1	2.64e-30	0.396397	0.757	0.727	9.66e-26	SLC16A1
CARMN	2.92e-39	0.395947	0.454	0.291	1.07e-34	CARMN
PLCB1	1.91e-42	0.395652	0.317	0.163	6.98e-38	PLCB1
ACOT13	6.91e-33	0.395611	0.707	0.675	2.53e-28	ACOT13
ARRDC3	7.77e-31	0.395551	0.344	0.22	2.85e-26	ARRDC3
EIF2S3	1.93e-39	0.39518	0.783	0.75	7.07e-35	EIF2S3
MAGOH	2.83e-23	0.39392	0.45	0.375	1.04e-18	MAGOH
NDUFA7	7.9e-46	0.393351	0.825	0.788	2.89e-41	NDUFA7
SDHC	3.16e-33	0.393235	0.682	0.639	1.16e-28	SDHC
ZFP36L1	7.47e-34	0.392936	0.911	0.897	2.73e-29	ZFP36L1
CDCA7L	6.97e-17	0.392278	0.445	0.389	2.55e-12	CDCA7L
LPCAT4	4.01e-46	0.392241	0.424	0.253	1.47e-41	LPCAT4
UBA1	3.3e-28	0.391229	0.636	0.589	1.21e-23	UBA1
GNG11	4.43e-11	0.390158	0.26	0.189	1.62e-06	GNG11
PTEN	6.25e-25	0.389144	0.568	0.525	2.29e-20	PTEN
ERG28	6.35e-22	0.388056	0.459	0.393	2.32e-17	ERG28
CMC1	5.9e-25	0.387443	0.546	0.493	2.16e-20	CMC1
IFI27L1	1.84e-28	0.386748	0.577	0.506	6.72e-24	IFI27L1
SKP1	1.54e-68	0.386632	0.956	0.934	5.62e-64	SKP1
ISL1	3.09e-29	0.385882	0.264	0.146	1.13e-24	ISL1
CFL1	1.49e-55	0.385607	0.968	0.938	5.44e-51	CFL1
SAP18	7.44e-46	0.384384	0.895	0.865	2.72e-41	SAP18
NDUFB8	1.97e-53	0.384341	0.923	0.896	7.19e-49	NDUFB8
COPE	1.09e-39	0.384294	0.84	0.809	4e-35	COPE
PLOD2	1.29e-31	0.382097	0.715	0.667	4.71e-27	PLOD2
GNG5	2.41e-68	0.382021	0.988	0.961	8.83e-64	GNG5
MRPS6	3.86e-37	0.380783	0.806	0.786	1.41e-32	MRPS6
A2M	1.51e-16	0.380535	0.308	0.214	5.54e-12	A2M
MVK	2.02e-22	0.380042	0.316	0.222	7.38e-18	MVK
WFIKKN1	1.87e-38	0.379946	0.435	0.28	6.85e-34	WFIKKN1
SPTSSA	3.08e-16	0.379514	0.507	0.487	1.13e-11	SPTSSA
EPHB2	3.42e-44	0.378037	0.345	0.185	1.25e-39	EPHB2
PTH1R	3.74e-25	0.377077	0.465	0.376	1.37e-20	PTH1R
SIGIRR	3.44e-16	0.376496	0.466	0.422	1.26e-11	SIGIRR
ODAM	2.1e-44	0.376243	0.348	0.173	7.68e-40	ODAM
INTS6	1.96e-18	0.375779	0.425	0.358	7.17e-14	INTS6
CDK16	5.87e-31	0.375023	0.603	0.543	2.15e-26	CDK16
H3F3A	2.82e-96	0.374632	0.996	0.985	1.03e-91	H3F3A
TCEAL4	4.04e-38	0.374628	0.878	0.862	1.48e-33	TCEAL4
EGFL7	4.05e-20	0.374499	0.361	0.273	1.48e-15	EGFL7
CCDC183	5.61e-34	0.37389	0.315	0.184	2.05e-29	CCDC183
ATP1B2	1.36e-23	0.373219	0.614	0.56	4.97e-19	ATP1B2
COL4A5	2.56e-20	0.372908	0.494	0.436	9.35e-16	COL4A5
GSTP1	9.1e-59	0.372802	0.974	0.939	3.33e-54	GSTP1
TAFA4	9.5e-28	0.372495	0.356	0.226	3.48e-23	TAFA4
THUMPD3-AS1	2.97e-14	0.372492	0.449	0.413	1.09e-09	THUMPD3-AS1
CTSL	2.47e-20	0.372081	0.497	0.442	9.03e-16	CTSL
FEZ1	1.15e-39	0.371958	0.303	0.159	4.22e-35	FEZ1
TMEM59	6.63e-34	0.370577	0.705	0.663	2.43e-29	TMEM59
BST2	3.01e-23	0.370534	0.305	0.186	1.1e-18	BST2
TMA7	2.44e-49	0.370467	0.956	0.92	8.93e-45	TMA7
CCDC81	2.69e-127	0.369799	0.158	0.015	9.85e-123	CCDC81
COX7A2	1.24e-57	0.369203	0.974	0.951	4.54e-53	COX7A2
AC015871.1	1.18e-21	0.369195	0.36	0.273	4.34e-17	AC015871.1
HNRNPA1	1.61e-49	0.367868	0.971	0.937	5.88e-45	HNRNPA1
EIF3K	1.55e-57	0.367366	0.962	0.948	5.69e-53	EIF3K
ELOB	2.57e-62	0.366184	0.97	0.946	9.41e-58	ELOB
OGA	4.87e-19	0.363374	0.602	0.587	1.78e-14	OGA
SDHD	8.25e-21	0.362794	0.57	0.547	3.02e-16	SDHD
CCT7	4.12e-29	0.362448	0.766	0.75	1.51e-24	CCT7
MRPL15	2.81e-32	0.36219	0.729	0.703	1.03e-27	MRPL15
UBE2L6	1.2e-23	0.361644	0.424	0.319	4.41e-19	UBE2L6
WDFY2	3.26e-39	0.361245	0.333	0.186	1.19e-34	WDFY2
CBWD1	2.47e-27	0.359794	0.445	0.342	9.04e-23	CBWD1
VKORC1	6.03e-27	0.359597	0.724	0.684	2.21e-22	VKORC1
VMP1	8.7e-24	0.359497	0.484	0.406	3.18e-19	VMP1
WDR74	3.31e-15	0.359464	0.37	0.311	1.21e-10	WDR74
ADAM28	1.58e-78	0.358865	0.284	0.09	5.78e-74	ADAM28
APLNR	1.83e-87	0.358402	0.214	0.049	6.71e-83	APLNR
PSMA4	4.57e-33	0.356563	0.779	0.733	1.67e-28	PSMA4
MTX2	1.78e-20	0.356489	0.559	0.524	6.53e-16	MTX2
RAB5IF	2.95e-29	0.356397	0.725	0.677	1.08e-24	RAB5IF
CXADR	2.48e-11	0.35518	0.503	0.51	9.09e-07	CXADR
SRSF2	1.49e-30	0.353977	0.719	0.668	5.47e-26	SRSF2
MEST	2.66e-18	0.353713	0.417	0.348	9.72e-14	MEST
DRAP1	2.07e-32	0.352524	0.817	0.785	7.56e-28	DRAP1
MCRIP1	1.67e-22	0.352346	0.581	0.54	6.12e-18	MCRIP1
PSMA3	2.34e-31	0.349903	0.743	0.687	8.56e-27	PSMA3
VDAC3	3.73e-37	0.349443	0.836	0.804	1.37e-32	VDAC3
MRPL47	8.52e-23	0.348992	0.67	0.64	3.12e-18	MRPL47
DOK6	5.15e-43	0.348768	0.259	0.118	1.89e-38	DOK6
UQCRC2	7.22e-40	0.348033	0.846	0.859	2.64e-35	UQCRC2
MIDN	3.24e-22	0.348004	0.603	0.566	1.19e-17	MIDN
ECI1	1.07e-39	0.347041	0.859	0.843	3.92e-35	ECI1
ARF5	1.86e-21	0.345339	0.563	0.53	6.82e-17	ARF5
ROMO1	5.66e-31	0.345153	0.882	0.83	2.07e-26	ROMO1
POLR2L	2.9e-41	0.344501	0.93	0.878	1.06e-36	POLR2L
NDUFAF4	2.84e-17	0.34443	0.505	0.464	1.04e-12	NDUFAF4
ATP5MD	2.95e-51	0.343576	0.974	0.944	1.08e-46	ATP5MD
GLRX5	6.53e-32	0.343251	0.795	0.76	2.39e-27	GLRX5
APRT	3.65e-24	0.342699	0.729	0.692	1.33e-19	APRT
NME4	4.13e-35	0.342424	0.916	0.898	1.51e-30	NME4
AK1	2.38e-29	0.341023	0.73	0.701	8.69e-25	AK1
SIPA1L2	1.61e-17	0.340026	0.757	0.748	5.89e-13	SIPA1L2
TMEM107	2.43e-09	0.339937	0.324	0.282	8.89e-05	TMEM107
SSBP2	2.46e-19	0.339094	0.551	0.515	8.99e-15	SSBP2
METRN	2.66e-21	0.338384	0.63	0.603	9.74e-17	METRN
PHB	2.11e-33	0.337745	0.872	0.846	7.73e-29	PHB
LAMA1	6.47e-21	0.336753	0.425	0.334	2.37e-16	LAMA1
TMED9	7.54e-31	0.336707	0.784	0.747	2.76e-26	TMED9
TRAPPC6A	5.34e-19	0.336073	0.54	0.499	1.95e-14	TRAPPC6A
LENG8	1.04e-28	0.335905	0.435	0.304	3.81e-24	LENG8
LGMN	1.72e-19	0.335281	0.53	0.491	6.3e-15	LGMN
FKBP8	6.53e-27	0.334937	0.753	0.741	2.39e-22	FKBP8
HMGCS1	2.26e-09	0.334796	0.589	0.566	8.29e-05	HMGCS1
PTMS	1.71e-34	0.334689	0.929	0.904	6.25e-30	PTMS
G6PC3	1e-15	0.334425	0.391	0.338	3.68e-11	G6PC3
EMC7	7.49e-17	0.334333	0.55	0.522	2.74e-12	EMC7
PSAT1	0.000916675	0.334212	0.247	0.237	1	PSAT1
C6orf62	2.21e-18	0.333914	0.502	0.457	8.1e-14	C6orf62
UQCC2	9.37e-34	0.33391	0.789	0.744	3.43e-29	UQCC2
MSRB2	6.17e-29	0.333431	0.793	0.78	2.26e-24	MSRB2
SERTAD3	2.03e-21	0.333383	0.362	0.269	7.43e-17	SERTAD3
PDHB	2.27e-24	0.332994	0.705	0.668	8.32e-20	PDHB
ATP5MPL	2.69e-48	0.33279	0.965	0.952	9.84e-44	ATP5MPL
MEF2C	3.83e-16	0.332729	0.769	0.771	1.4e-11	MEF2C
TMEM98	2.33e-20	0.332321	0.655	0.627	8.53e-16	TMEM98
CALM3	8.36e-29	0.331911	0.844	0.804	3.06e-24	CALM3
MRPL28	1.42e-30	0.33174	0.715	0.663	5.21e-26	MRPL28
TRAPPC1	6.53e-32	0.331265	0.764	0.714	2.39e-27	TRAPPC1
CDH3	7.4e-25	0.330989	0.374	0.263	2.71e-20	CDH3
NKX3-1	1.39e-33	0.329735	0.224	0.108	5.09e-29	NKX3-1
DDIT4	6.21e-39	0.328637	0.703	0.551	2.27e-34	DDIT4
GHITM	2.36e-35	0.328511	0.875	0.86	8.63e-31	GHITM
PFDN2	4.52e-24	0.328413	0.715	0.688	1.65e-19	PFDN2
KLHDC3	1.05e-17	0.328188	0.609	0.595	3.86e-13	KLHDC3
CDC42	9.63e-28	0.327975	0.897	0.883	3.53e-23	CDC42
MRPS36	2.28e-24	0.327266	0.724	0.704	8.35e-20	MRPS36
RBM4	1.37e-22	0.326919	0.671	0.662	5.01e-18	RBM4
MYO1B	1.57e-09	0.326901	0.356	0.322	5.75e-05	MYO1B
TCEAL9	3.82e-29	0.326817	0.816	0.768	1.4e-24	TCEAL9
SH3BGRL	2.08e-24	0.326362	0.669	0.629	7.63e-20	SH3BGRL
RPL26L1	5.17e-20	0.325173	0.637	0.612	1.89e-15	RPL26L1
ACADVL	6.59e-20	0.325169	0.634	0.621	2.41e-15	ACADVL
TOMM22	3.79e-21	0.324984	0.673	0.64	1.39e-16	TOMM22
COX16	1.04e-18	0.324837	0.639	0.607	3.8e-14	COX16
ATP5F1A	1.27e-52	0.324379	0.977	0.975	4.65e-48	ATP5F1A
PSMA2	9.88e-35	0.323986	0.869	0.824	3.61e-30	PSMA2
TMEM106B	4.89e-18	0.323825	0.532	0.49	1.79e-13	TMEM106B
RHOB	6.07e-23	0.323705	0.286	0.185	2.22e-18	RHOB
SCD	2.25e-17	0.323195	0.726	0.705	8.23e-13	SCD
EPHB6	3.79e-60	0.323126	0.188	0.054	1.39e-55	EPHB6
CSTB	1.17e-27	0.323115	0.761	0.722	4.3e-23	CSTB
KCNIP2	1.97e-37	0.322628	0.209	0.087	7.19e-33	KCNIP2
GNAI2	4.96e-21	0.321317	0.68	0.673	1.82e-16	GNAI2
DDOST	1.43e-20	0.321263	0.617	0.59	5.22e-16	DDOST
HM13	5.17e-19	0.320953	0.524	0.485	1.89e-14	HM13
SERPINF1	1.8e-20	0.320904	0.391	0.294	6.59e-16	SERPINF1
COX4I1	3.86e-65	0.320635	0.993	0.979	1.41e-60	COX4I1
TMEM185A	2.65e-14	0.320022	0.473	0.434	9.7e-10	TMEM185A
PTPRF	1.28e-14	0.319936	0.411	0.36	4.68e-10	PTPRF
GTF3C6	5.46e-24	0.319488	0.715	0.658	2e-19	GTF3C6
PTCH1	6.68e-22	0.318997	0.259	0.161	2.44e-17	PTCH1
KDM6B	7.58e-18	0.318996	0.481	0.419	2.77e-13	KDM6B
MRPL41	3.88e-32	0.318782	0.926	0.904	1.42e-27	MRPL41
LAPTM4B	3.45e-42	0.318653	0.968	0.953	1.26e-37	LAPTM4B
BMP7	0.0172786	0.318195	0.583	0.665	1	BMP7
RSRP1	2.46e-20	0.318015	0.654	0.615	9.01e-16	RSRP1
PRDX3	8.05e-27	0.318005	0.76	0.717	2.94e-22	PRDX3
CREG1	2.34e-14	0.31799	0.443	0.401	8.55e-10	CREG1
LSM5	2.24e-15	0.317083	0.602	0.593	8.21e-11	LSM5
C1orf122	1.42e-20	0.316666	0.715	0.684	5.21e-16	C1orf122
SLC25A39	4.44e-20	0.315455	0.578	0.551	1.62e-15	SLC25A39
ACSL3	9.1e-17	0.315312	0.653	0.652	3.33e-12	ACSL3
SLC40A1	7.2e-15	0.314689	0.274	0.198	2.63e-10	SLC40A1
LHFPL2	4.52e-14	0.314631	0.542	0.512	1.65e-09	LHFPL2
NDN	1.89e-20	0.31441	0.647	0.623	6.93e-16	NDN
COA1	1.37e-28	0.314236	0.79	0.783	5.02e-24	COA1
SPRY4	8.91e-37	0.313759	0.224	0.1	3.26e-32	SPRY4
RASL10B	1.54e-13	0.312994	0.386	0.331	5.65e-09	RASL10B
CCDC90B	1.62e-16	0.312974	0.589	0.578	5.94e-12	CCDC90B
VAMP2	3e-18	0.312912	0.673	0.664	1.1e-13	VAMP2
HLA-DQB1	7.56e-126	0.312789	0.183	0.022	2.77e-121	HLA-DQB1
CALM2	3.01e-35	0.312713	0.943	0.922	1.1e-30	CALM2
RHOA	2.84e-27	0.311929	0.851	0.828	1.04e-22	RHOA
FDFT1	3.91e-12	0.311713	0.633	0.615	1.43e-07	FDFT1
ATP1B3	3.57e-18	0.311682	0.61	0.592	1.31e-13	ATP1B3
EIF4A3	9.24e-16	0.311625	0.515	0.489	3.38e-11	EIF4A3
NDUFV2	1.99e-28	0.310889	0.908	0.869	7.27e-24	NDUFV2
HIBADH	3.64e-17	0.310584	0.349	0.269	1.33e-12	HIBADH
CHMP2A	9.7e-24	0.310051	0.761	0.766	3.55e-19	CHMP2A
POLR2K	2.13e-17	0.309712	0.504	0.468	7.78e-13	POLR2K
LAMTOR4	2.35e-25	0.30966	0.772	0.745	8.61e-21	LAMTOR4
RPL27	2.4e-55	0.309586	0.99	0.975	8.79e-51	RPL27
GADD45A	2.39e-12	0.309425	0.566	0.555	8.73e-08	GADD45A
DAB1	9.1e-19	0.308834	0.339	0.247	3.33e-14	DAB1
SNRPD3	2.76e-18	0.308651	0.627	0.625	1.01e-13	SNRPD3
PHGDH	0.00505993	0.308145	0.5	0.54	1	PHGDH
IGDCC3	5.91e-13	0.307046	0.456	0.412	2.16e-08	IGDCC3
LSM8	3.84e-18	0.306711	0.612	0.579	1.4e-13	LSM8
PCAT6	2.37e-26	0.306482	0.343	0.22	8.68e-22	PCAT6
MYADM	4e-14	0.305952	0.454	0.406	1.46e-09	MYADM
NEDD8	1.12e-33	0.3053	0.919	0.894	4.11e-29	NEDD8
MYL12B	2.45e-24	0.304996	0.81	0.769	8.97e-20	MYL12B
LMAN2	1.37e-15	0.303896	0.618	0.61	5.02e-11	LMAN2
ITGB1BP1	3.01e-17	0.303683	0.547	0.51	1.1e-12	ITGB1BP1
LYPLAL1	2.43e-15	0.30345	0.474	0.423	8.88e-11	LYPLAL1
PPP2R2B	2.34e-61	0.30312	0.204	0.059	8.58e-57	PPP2R2B
RPN2	5.96e-19	0.303035	0.719	0.684	2.18e-14	RPN2
CAPN3	4.03e-21	0.302455	0.407	0.29	1.48e-16	CAPN3
STK26	1.74e-14	0.302292	0.547	0.534	6.37e-10	STK26
ISYNA1	7.54e-15	0.302078	0.67	0.694	2.76e-10	ISYNA1
SMIM26	3.36e-24	0.301948	0.736	0.728	1.23e-19	SMIM26
SNHG29	2.26e-36	0.301707	0.981	0.964	8.26e-32	SNHG29
FGFR2	6.1e-10	0.301607	0.352	0.313	2.23e-05	FGFR2
PDCD6	5.99e-21	0.300388	0.621	0.59	2.19e-16	PDCD6
KDM5C	5.73e-18	0.299983	0.358	0.274	2.1e-13	KDM5C
THYN1	3.61e-12	0.299802	0.489	0.479	1.32e-07	THYN1
NDUFS3	5.94e-23	0.299605	0.735	0.733	2.17e-18	NDUFS3
PPIA	1.14e-43	0.299576	0.988	0.966	4.16e-39	PPIA
LSM6	1.82e-10	0.29911	0.376	0.341	6.65e-06	LSM6
SAT1	2.01e-13	0.299069	0.356	0.287	7.36e-09	SAT1
PKIA	7.1e-13	0.29876	0.633	0.644	2.6e-08	PKIA
BRD2	6.86e-10	0.297796	0.534	0.543	2.51e-05	BRD2
REEP6	1.21e-21	0.297704	0.354	0.243	4.42e-17	REEP6
MAGED1	1.71e-15	0.297211	0.677	0.674	6.24e-11	MAGED1
RNASEK	6.09e-34	0.297021	0.924	0.908	2.23e-29	RNASEK
MAT2A	1.43e-15	0.295931	0.613	0.608	5.22e-11	MAT2A
PTGR1	2.48e-13	0.295877	0.528	0.514	9.08e-09	PTGR1
C9orf16	6.93e-23	0.295853	0.763	0.755	2.54e-18	C9orf16
LAGE3	3.66e-14	0.295628	0.63	0.633	1.34e-09	LAGE3
MYL12A	1.07e-26	0.295511	0.847	0.792	3.91e-22	MYL12A
GCHFR	1.28e-12	0.295414	0.537	0.528	4.7e-08	GCHFR
KRT8	3.36e-22	0.295198	0.956	0.936	1.23e-17	KRT8
LRRTM1	6.53e-71	0.295038	0.14	0.025	2.39e-66	LRRTM1
SOX11	2.11e-15	0.29501	0.421	0.351	7.71e-11	SOX11
GCLC	2.01e-09	0.294606	0.281	0.236	7.36e-05	GCLC
PURPL	1e-26	0.294008	0.226	0.115	3.67e-22	PURPL
RRAGA	7.15e-12	0.293933	0.486	0.472	2.62e-07	RRAGA
DYNLT1	7.45e-25	0.293869	0.886	0.848	2.73e-20	DYNLT1
ERCC1	4.22e-16	0.293449	0.583	0.567	1.54e-11	ERCC1
ARG2	0.116283	0.292854	0.209	0.213	1	ARG2
HMGB3	7.64e-19	0.292751	0.665	0.615	2.8e-14	HMGB3
ACAT2	1.25e-07	0.2921	0.439	0.415	0.00458204	ACAT2
LMO4	3.21e-15	0.292077	0.715	0.741	1.18e-10	LMO4
DPY30	2.16e-15	0.291707	0.566	0.553	7.89e-11	DPY30
MTCH2	3.15e-16	0.291303	0.669	0.658	1.15e-11	MTCH2
CCS	1.48e-11	0.291025	0.449	0.423	5.44e-07	CCS
CNPY2	4.74e-18	0.290888	0.682	0.67	1.74e-13	CNPY2
MIR210HG	3.92e-18	0.290872	0.484	0.392	1.43e-13	MIR210HG
LSM7	3.83e-22	0.290562	0.75	0.748	1.4e-17	LSM7
STC2	4.7e-06	0.290449	0.34	0.311	0.172	STC2
CDK6	3.37e-05	0.290428	0.655	0.709	1	CDK6
PTPMT1	3.96e-12	0.289991	0.417	0.382	1.45e-07	PTPMT1
TM7SF2	3.08e-12	0.288662	0.552	0.528	1.13e-07	TM7SF2
TUBA1B	8.77e-41	0.287929	0.936	0.851	3.21e-36	TUBA1B
PIH1D1	5.52e-10	0.287807	0.471	0.461	2.02e-05	PIH1D1
ANKRD33B	1.14e-28	0.287516	0.269	0.15	4.17e-24	ANKRD33B
NPM3	8.71e-12	0.285918	0.517	0.506	3.19e-07	NPM3
ETFA	2.92e-22	0.285883	0.715	0.68	1.07e-17	ETFA
SDHAF3	1.64e-10	0.285268	0.399	0.368	5.99e-06	SDHAF3
ELOC	9.78e-21	0.285179	0.747	0.69	3.58e-16	ELOC
AC245014.3	3.77e-60	0.285094	0.155	0.036	1.38e-55	AC245014.3
ATRAID	3.14e-17	0.285062	0.686	0.684	1.15e-12	ATRAID
CRB2	2.39e-17	0.284953	0.359	0.274	8.76e-13	CRB2
PTGES2	2.39e-13	0.284842	0.553	0.549	8.75e-09	PTGES2
CFC1	4.81e-08	0.284783	0.316	0.269	0.00176049	CFC1
MRPL22	8.29e-13	0.284716	0.557	0.556	3.03e-08	MRPL22
RTL8B	2.25e-13	0.283901	0.389	0.337	8.23e-09	RTL8B
NDUFA6	8.55e-28	0.283692	0.888	0.869	3.13e-23	NDUFA6
LRRC75A	9.18e-12	0.283438	0.267	0.201	3.36e-07	LRRC75A
IDH1	7.51e-12	0.283151	0.504	0.484	2.75e-07	IDH1
ATP5PD	3.67e-34	0.282945	0.959	0.931	1.34e-29	ATP5PD
B2M	2.01e-15	0.282926	0.783	0.771	7.36e-11	B2M
ENDOG	2.93e-20	0.282913	0.708	0.687	1.07e-15	ENDOG
SEPTIN9	3.31e-15	0.282665	0.6	0.594	1.21e-10	SEPTIN9
ATP5F1D	2.53e-38	0.282431	0.974	0.963	9.25e-34	ATP5F1D
EDF1	1.7e-31	0.28212	0.938	0.93	6.24e-27	EDF1
SERPINB6	8.66e-11	0.281433	0.593	0.62	3.17e-06	SERPINB6
IRS1	1.52e-07	0.280858	0.336	0.302	0.00556462	IRS1
WFDC2	4.8e-07	0.280823	0.185	0.143	0.0175787	WFDC2
THOC7	2.05e-16	0.280022	0.609	0.605	7.51e-12	THOC7
C18orf32	9.12e-16	0.279929	0.639	0.647	3.34e-11	C18orf32
TFG	9.25e-13	0.279542	0.654	0.639	3.39e-08	TFG
GRHPR	3.21e-18	0.279152	0.754	0.768	1.17e-13	GRHPR
MRPL39	2.44e-16	0.278925	0.344	0.272	8.94e-12	MRPL39
TDGF1	3.51e-28	0.278898	0.23	0.117	1.28e-23	TDGF1
PSMD10	2.23e-12	0.278878	0.383	0.332	8.15e-08	PSMD10
PHPT1	6.25e-32	0.278315	0.954	0.945	2.29e-27	PHPT1
NDUFS7	7.49e-21	0.277661	0.813	0.803	2.74e-16	NDUFS7
TIA1	5.75e-13	0.277516	0.533	0.517	2.1e-08	TIA1
IGFBP4	6.4e-15	0.277503	0.28	0.202	2.34e-10	IGFBP4
TSTD1	1.32e-18	0.27718	0.756	0.756	4.82e-14	TSTD1
GRN	3.46e-14	0.275756	0.551	0.533	1.27e-09	GRN
GANAB	4.15e-12	0.275752	0.379	0.329	1.52e-07	GANAB
SLC25A4	1.51e-27	0.275538	0.957	0.952	5.53e-23	SLC25A4
NBDY	4.15e-17	0.275507	0.694	0.7	1.52e-12	NBDY
UBE2V2	1.01e-13	0.275307	0.587	0.582	3.7e-09	UBE2V2
COPS8	2.34e-13	0.274995	0.499	0.479	8.56e-09	COPS8
NSMCE3	1.81e-10	0.27441	0.363	0.321	6.62e-06	NSMCE3
TTYH3	3.19e-25	0.274353	0.285	0.174	1.17e-20	TTYH3
FAHD2A	1.03e-13	0.273984	0.339	0.278	3.77e-09	FAHD2A
SUCLG1	8.24e-19	0.273543	0.799	0.781	3.01e-14	SUCLG1
MMD	5.71e-07	0.273308	0.272	0.235	0.0209048	MMD
ZNF385A	1.38e-20	0.273284	0.267	0.17	5.06e-16	ZNF385A
SS18L2	2.66e-07	0.272967	0.308	0.282	0.0097525	SS18L2
ACAA1	2.55e-10	0.272662	0.551	0.568	9.34e-06	ACAA1
PODXL	2.9e-12	0.2722	0.338	0.274	1.06e-07	PODXL
UBE2D2	1.15e-20	0.272185	0.783	0.782	4.2e-16	UBE2D2
HIGD2A	2.89e-27	0.27212	0.868	0.858	1.06e-22	HIGD2A
SVBP	3.73e-13	0.271338	0.496	0.471	1.37e-08	SVBP
SNRPG	1.18e-17	0.271137	0.79	0.752	4.31e-13	SNRPG
AURKAIP1	5.48e-23	0.270826	0.884	0.864	2.01e-18	AURKAIP1
GPRC5C	9.1e-14	0.270571	0.387	0.319	3.33e-09	GPRC5C
ANKRD10	2.91e-13	0.270516	0.376	0.313	1.06e-08	ANKRD10
SSBP3	2.38e-08	0.27039	0.458	0.459	0.000870911	SSBP3
ATOX1	1.15e-18	0.270369	0.738	0.705	4.21e-14	ATOX1
COL4A6	8.39e-08	0.270354	0.407	0.38	0.00306954	COL4A6
MAP3K20	1.83e-14	0.270269	0.742	0.756	6.68e-10	MAP3K20
MRPL2	1.19e-11	0.270212	0.561	0.575	4.37e-07	MRPL2
HYAL2	3.98e-10	0.269741	0.373	0.34	1.46e-05	HYAL2
AP002360.1	2.33e-09	0.269347	0.297	0.246	8.53e-05	AP002360.1
YWHAB	1.09e-24	0.269287	0.88	0.847	4e-20	YWHAB
TECR	9.75e-09	0.269026	0.502	0.517	0.00035683	TECR
PSPH	2.24e-05	0.268646	0.299	0.285	0.820454	PSPH
XIAP	6.88e-13	0.268388	0.509	0.482	2.52e-08	XIAP
HDDC2	9.63e-14	0.268307	0.627	0.627	3.52e-09	HDDC2
LDOC1	2.54e-14	0.268148	0.287	0.213	9.29e-10	LDOC1
TMEM50A	1.73e-19	0.268145	0.719	0.701	6.32e-15	TMEM50A
MRPL57	1.59e-16	0.268085	0.778	0.767	5.81e-12	MRPL57
CNIH4	7.36e-11	0.26806	0.521	0.514	2.69e-06	CNIH4
CHCHD1	2.53e-12	0.26776	0.61	0.61	9.27e-08	CHCHD1
BMP4	1.76e-22	0.267696	0.209	0.112	6.43e-18	BMP4
CUEDC2	1.38e-11	0.267535	0.552	0.557	5.06e-07	CUEDC2
BEX1	2.42e-07	0.267429	0.69	0.695	0.00885026	BEX1
APOA1	1.94e-19	0.267402	0.459	0.356	7.12e-15	APOA1
BNIP3L	2.91e-17	0.267291	0.708	0.696	1.06e-12	BNIP3L
FOXH1	7.54e-12	0.267275	0.362	0.292	2.76e-07	FOXH1
PSMC6	1.1e-11	0.266626	0.646	0.661	4.03e-07	PSMC6
ARL3	1.8e-17	0.266427	0.715	0.699	6.59e-13	ARL3
ADCY1	9.44e-24	0.266386	0.241	0.136	3.46e-19	ADCY1
AC022168.1	9.92e-18	0.266019	0.338	0.24	3.63e-13	AC022168.1
SPRY2	5.94e-08	0.265934	0.307	0.26	0.00217396	SPRY2
NDUFB4	1.85e-24	0.265511	0.88	0.867	6.78e-20	NDUFB4
FASN	1.6e-06	0.265003	0.449	0.456	0.0587376	FASN
SPCS1	1.27e-18	0.264996	0.782	0.772	4.63e-14	SPCS1
PAPSS1	2.75e-11	0.264956	0.273	0.214	1.01e-06	PAPSS1
PFKL	2.92e-11	0.264596	0.453	0.421	1.07e-06	PFKL
LSM3	4.35e-16	0.264579	0.697	0.661	1.59e-11	LSM3
SLC39A4	8.02e-46	0.264071	0.177	0.058	2.94e-41	SLC39A4
COPS6	5.82e-15	0.264004	0.713	0.7	2.13e-10	COPS6
NIT2	2.82e-09	0.26386	0.373	0.348	0.000103035	NIT2
POLR2J	5.37e-14	0.263773	0.649	0.644	1.97e-09	POLR2J
PRKRA	3.23e-10	0.263755	0.428	0.41	1.18e-05	PRKRA
AC018521.5	4.77e-12	0.26374	0.434	0.389	1.75e-07	AC018521.5
SFT2D1	3.61e-07	0.26365	0.31	0.287	0.0132282	SFT2D1
ZNF761	1.9e-25	0.263564	0.216	0.115	6.95e-21	ZNF761
HS6ST2	1.15e-17	0.263413	0.235	0.15	4.2e-13	HS6ST2
STOML2	2.16e-14	0.263322	0.682	0.687	7.92e-10	STOML2
ITM2B	1.51e-17	0.262964	0.814	0.807	5.52e-13	ITM2B
BAG1	1.64e-18	0.262923	0.771	0.755	6.01e-14	BAG1
RTRAF	2.06e-24	0.262488	0.899	0.879	7.55e-20	RTRAF
VEGFA	5.29e-27	0.262285	0.773	0.737	1.93e-22	VEGFA
SDHB	7.71e-09	0.262011	0.53	0.532	0.00028215	SDHB
PDIA6	5.45e-22	0.261997	0.852	0.859	2e-17	PDIA6
PQBP1	1.02e-11	0.261772	0.488	0.468	3.72e-07	PQBP1
TMEM45A	4.5e-13	0.261438	0.366	0.299	1.65e-08	TMEM45A
DDX39B	3.55e-21	0.26054	0.766	0.783	1.3e-16	DDX39B
PLIN3	7.25e-11	0.260478	0.505	0.492	2.66e-06	PLIN3
C11orf74	3.53e-20	0.259465	0.334	0.225	1.29e-15	C11orf74
NAA38	2.86e-10	0.259273	0.663	0.677	1.05e-05	NAA38
TRAPPC5	1.04e-15	0.259172	0.67	0.661	3.79e-11	TRAPPC5
SLC25A11	1.09e-13	0.259083	0.69	0.714	4e-09	SLC25A11
OAZ2	1.99e-13	0.25844	0.609	0.615	7.29e-09	OAZ2
CSNK1E	7.9e-12	0.257971	0.548	0.543	2.89e-07	CSNK1E
SNF8	2.98e-13	0.257959	0.622	0.593	1.09e-08	SNF8
SLC47A1	2.86e-14	0.257888	0.234	0.16	1.05e-09	SLC47A1
ODC1	2.39e-10	0.257194	0.589	0.592	8.75e-06	ODC1
DACT3	1.19e-07	0.257036	0.471	0.47	0.00436674	DACT3
RBBP7	5.13e-17	0.256705	0.733	0.726	1.88e-12	RBBP7
PDK3	6.03e-10	0.256151	0.462	0.442	2.21e-05	PDK3
PFKFB4	6.85e-22	0.255813	0.257	0.151	2.51e-17	PFKFB4
RFXANK	1.95e-09	0.255614	0.42	0.403	7.13e-05	RFXANK
SLC25A37	5.6e-13	0.255313	0.659	0.667	2.05e-08	SLC25A37
SNRPB2	1.19e-12	0.255297	0.681	0.694	4.37e-08	SNRPB2
UNC50	3.69e-12	0.255195	0.272	0.209	1.35e-07	UNC50
COQ5	4.22e-12	0.255184	0.411	0.364	1.54e-07	COQ5
SALL1	2.56e-16	0.255044	0.233	0.152	9.37e-12	SALL1
RBM7	5e-10	0.254142	0.353	0.309	1.83e-05	RBM7
LYPLA1	1.7e-12	0.25386	0.633	0.631	6.21e-08	LYPLA1
RAB30-DT	1.35e-07	0.253214	0.373	0.349	0.00492775	RAB30-DT
COX5A	1.87e-36	0.252762	0.982	0.966	6.83e-32	COX5A
ACTR10	2.3e-12	0.252542	0.552	0.54	8.42e-08	ACTR10
SCAND1	3.11e-16	0.252222	0.744	0.768	1.14e-11	SCAND1
WBP1	7.91e-08	0.252077	0.401	0.388	0.00289697	WBP1
KANK1	1.18e-09	0.251797	0.3	0.251	4.32e-05	KANK1
OCRL	1.13e-19	0.251787	0.254	0.161	4.14e-15	OCRL
ATP6V0D1	6.36e-10	0.251495	0.485	0.478	2.33e-05	ATP6V0D1
GATM	0.0856266	0.251363	0.28	0.296	1	GATM
MYLIP	1.46e-16	0.251284	0.271	0.178	5.33e-12	MYLIP
PSMD11	8.31e-10	0.251282	0.517	0.516	3.04e-05	PSMD11
MMAB	8.48e-09	0.251125	0.525	0.528	0.000310332	MMAB
RCN1	0.00027474	0.251123	0.546	0.586	1	RCN1
BCAP31	1.8e-09	0.250811	0.563	0.587	6.59e-05	BCAP31
MRPS7	1.5e-13	0.250726	0.69	0.688	5.49e-09	MRPS7
HSD17B10	1.85e-09	0.25057	0.607	0.607	6.76e-05	HSD17B10
ANAPC16	5.87e-24	0.250518	0.892	0.875	2.15e-19	ANAPC16
MRPL18	4.76e-10	0.250204	0.538	0.538	1.74e-05	MRPL18
COA3	5.43e-09	0.250057	0.603	0.634	0.000198701	COA3
SHMT2	0.00277165	0.249568	0.374	0.392	1	SHMT2
SCOC	6.67e-18	0.249492	0.702	0.696	2.44e-13	SCOC
ATP11C	1.09e-17	0.249436	0.283	0.194	3.98e-13	ATP11C
DBI	2.93e-13	0.249388	0.808	0.76	1.07e-08	DBI
RAN	4.48e-23	0.249199	0.924	0.912	1.64e-18	RAN
DYNLL1	5.42e-24	0.248667	0.956	0.913	1.98e-19	DYNLL1
FGF10	6.6e-26	0.248656	0.19	0.092	2.41e-21	FGF10
ATP6V0C	3.48e-15	0.247807	0.756	0.759	1.28e-10	ATP6V0C
FMC1	1.34e-09	0.247612	0.508	0.508	4.9e-05	FMC1
LAMC3	2.94e-61	0.247601	0.167	0.041	1.08e-56	LAMC3
GSTK1	3.75e-10	0.247573	0.613	0.637	1.37e-05	GSTK1
SOX12	4.32e-07	0.247281	0.467	0.474	0.0158121	SOX12
C17orf49	1.82e-08	0.247264	0.47	0.468	0.000666373	C17orf49
SULT1A1	2.99e-17	0.246499	0.196	0.116	1.09e-12	SULT1A1
DECR1	4.2e-09	0.245705	0.569	0.583	0.000153758	DECR1
SNRNP40	4.36e-08	0.245694	0.32	0.29	0.00159708	SNRNP40
MANF	9.95e-08	0.245585	0.512	0.513	0.00364182	MANF
TMEM41A	1.02e-07	0.245479	0.379	0.35	0.00375047	TMEM41A
TPRKB	2.72e-08	0.245229	0.443	0.43	0.00099664	TPRKB
FAM53C	1.14e-05	0.244781	0.267	0.237	0.416252	FAM53C
ZNF611	1.86e-05	0.244515	0.26	0.234	0.682108	ZNF611
PRCP	0.000116334	0.244501	0.419	0.442	1	PRCP
SMIM12	8.25e-06	0.244123	0.375	0.373	0.301783	SMIM12
RAB1A	2.22e-09	0.243765	0.591	0.6	8.14e-05	RAB1A
NQO2	1.44e-06	0.243683	0.437	0.446	0.0527479	NQO2
PDCD4	0.000378537	0.243591	0.365	0.362	1	PDCD4
COX7A2L	5.46e-21	0.243547	0.81	0.817	2e-16	COX7A2L
PUF60	1.22e-07	0.243353	0.55	0.573	0.00448312	PUF60
IER3IP1	1.06e-09	0.243287	0.571	0.581	3.87e-05	IER3IP1
ID2	6.47e-08	0.242967	0.785	0.811	0.00236793	ID2
RHOT2	2.09e-09	0.242516	0.416	0.395	7.65e-05	RHOT2
CHST11	2.59e-20	0.242498	0.236	0.142	9.47e-16	CHST11
GALNT1	1.31e-06	0.242366	0.473	0.49	0.0478917	GALNT1
EIF3M	2.36e-12	0.242293	0.763	0.782	8.63e-08	EIF3M
RBIS	1.58e-12	0.242291	0.705	0.715	5.8e-08	RBIS
ISCA2	3.25e-08	0.242228	0.551	0.575	0.00119102	ISCA2
MRPL11	2.75e-12	0.242115	0.54	0.519	1.01e-07	MRPL11
USP11	7.87e-09	0.241898	0.515	0.524	0.000287968	USP11
MRPL51	5.62e-17	0.241871	0.85	0.818	2.06e-12	MRPL51
PFKFB3	3.02e-06	0.241847	0.305	0.274	0.110376	PFKFB3
PBX1	1.76e-09	0.241789	0.762	0.785	6.45e-05	PBX1
ATP6V0B	1.41e-14	0.241755	0.795	0.791	5.16e-10	ATP6V0B
WAKMAR2	3.87e-66	0.241747	0.148	0.03	1.42e-61	WAKMAR2
ITGA6	0.0131901	0.241723	0.312	0.326	1	ITGA6
PLGRKT	6.71e-10	0.241721	0.294	0.245	2.46e-05	PLGRKT
TIMP1	1.89e-06	0.241709	0.601	0.617	0.0693492	TIMP1
AC002454.1	1.13e-15	0.241641	0.139	0.073	4.13e-11	AC002454.1
TRMT112	4.97e-09	0.241639	0.703	0.727	0.000182083	TRMT112
SLC35B1	4.35e-08	0.24137	0.444	0.436	0.00159215	SLC35B1
FKBP3	2.48e-16	0.24137	0.867	0.795	9.08e-12	FKBP3
NDUFA1	1.72e-23	0.241363	0.943	0.931	6.3e-19	NDUFA1
UBE2N	1.33e-08	0.241115	0.51	0.509	0.000485931	UBE2N
GSTM4	1.67e-07	0.241059	0.449	0.443	0.00610923	GSTM4
SPCS2	2.05e-14	0.241032	0.787	0.783	7.51e-10	SPCS2
SSBP1	2.96e-16	0.240843	0.838	0.814	1.08e-11	SSBP1
EIF4A2	2.76e-21	0.240718	0.9	0.899	1.01e-16	EIF4A2
ORMDL1	1.8e-11	0.240524	0.608	0.62	6.59e-07	ORMDL1
PPP2R1A	2e-14	0.240407	0.723	0.728	7.33e-10	PPP2R1A
SELENOT	1.58e-07	0.240325	0.581	0.598	0.00578169	SELENOT
NDUFA11	3.33e-26	0.240324	0.95	0.935	1.22e-21	NDUFA11
LAMB2	5.62e-11	0.24018	0.629	0.641	2.06e-06	LAMB2
ATP5F1E	3.29e-38	0.239752	0.994	0.986	1.21e-33	ATP5F1E
NFKBIA	7.54e-10	0.239713	0.29	0.232	2.76e-05	NFKBIA
UQCRB	3.25e-40	0.239629	0.989	0.98	1.19e-35	UQCRB
RAC1	3.74e-17	0.239412	0.848	0.846	1.37e-12	RAC1
RANBP1	6.19e-18	0.239231	0.718	0.68	2.26e-13	RANBP1
ZNF738	2.85e-10	0.239226	0.273	0.218	1.04e-05	ZNF738
GOT1	1.33e-14	0.239078	0.768	0.777	4.87e-10	GOT1
GALNT2	3.15e-06	0.239031	0.291	0.262	0.115283	GALNT2
EBP	2.78e-05	0.238715	0.458	0.472	1	EBP
MAPKAPK5-AS1	4.35e-07	0.238652	0.379	0.363	0.0159159	MAPKAPK5-AS1
OBSL1	5.91e-12	0.238518	0.678	0.708	2.16e-07	OBSL1
LINC00662	6.9e-09	0.238361	0.294	0.244	0.00025244	LINC00662
LINC00173	1.57e-39	0.238274	0.212	0.085	5.75e-35	LINC00173
B3GAT3	6.35e-06	0.238173	0.294	0.272	0.232445	B3GAT3
DPCD	4.1e-07	0.238056	0.489	0.505	0.0150068	DPCD
ARF4	2.37e-13	0.237059	0.61	0.601	8.66e-09	ARF4
MTHFS	4.22e-05	0.236944	0.407	0.424	1	MTHFS
STRAP	1.27e-17	0.236654	0.771	0.758	4.66e-13	STRAP
CSRP1	1.06e-06	0.236571	0.36	0.325	0.038786	CSRP1
GET3	7.49e-06	0.236535	0.403	0.413	0.274091	GET3
PSMA1	3.61e-16	0.236457	0.791	0.781	1.32e-11	PSMA1
MTFR1L	1.19e-11	0.236444	0.607	0.615	4.37e-07	MTFR1L
ATP5PB	5.01e-17	0.236412	0.881	0.877	1.83e-12	ATP5PB
GGA2	2.1e-08	0.236292	0.559	0.592	0.000769238	GGA2
PRPSAP2	1.68e-08	0.235974	0.407	0.388	0.000614537	PRPSAP2
TPGS1	0.000744599	0.235876	0.352	0.363	1	TPGS1
COPS5	7e-12	0.235708	0.594	0.583	2.56e-07	COPS5
C12orf57	0.000976346	0.235684	0.613	0.684	1	C12orf57
MMP24OS	6.42e-06	0.235325	0.444	0.455	0.234811	MMP24OS
C19orf81	1.5e-10	0.235096	0.263	0.203	5.48e-06	C19orf81
HK2	1.33e-12	0.235038	0.46	0.394	4.85e-08	HK2
AC126773.4	6.15e-14	0.234831	0.234	0.157	2.25e-09	AC126773.4
C1D	3.22e-07	0.234683	0.451	0.457	0.011786	C1D
PPCS	7.36e-08	0.234637	0.498	0.507	0.00269472	PPCS
MICOS13	9.07e-15	0.234291	0.766	0.769	3.32e-10	MICOS13
CYBA	3.93e-10	0.234219	0.659	0.67	1.44e-05	CYBA
TWIST1	7.32e-24	0.234091	0.177	0.084	2.68e-19	TWIST1
SNRNP70	1.6e-16	0.23408	0.694	0.678	5.87e-12	SNRNP70
ISCU	8.65e-07	0.233873	0.509	0.525	0.03167	ISCU
KLHL42	9.53e-07	0.233626	0.318	0.287	0.0348924	KLHL42
PFDN5	1.63e-33	0.233623	0.966	0.956	5.98e-29	PFDN5
TM2D1	2.57e-05	0.233396	0.409	0.415	0.941344	TM2D1
PDE6D	4.12e-15	0.233335	0.25	0.173	1.51e-10	PDE6D
AKR7A2	3.54e-07	0.233218	0.475	0.486	0.0129388	AKR7A2
SNRPF	5.71e-12	0.233102	0.733	0.719	2.09e-07	SNRPF
RAP2C	2.61e-11	0.232917	0.35	0.289	9.55e-07	RAP2C
PLAGL2	5.62e-08	0.232657	0.392	0.369	0.00205545	PLAGL2
IFT27	4.07e-08	0.232206	0.372	0.342	0.00148814	IFT27
ITFG1	1.42e-06	0.232096	0.411	0.406	0.0519695	ITFG1
SELENOH	2.25e-13	0.231772	0.886	0.858	8.23e-09	SELENOH
MYO10	1.35e-19	0.231699	0.234	0.144	4.93e-15	MYO10
TMEM87A	2.17e-09	0.231639	0.501	0.498	7.93e-05	TMEM87A
TSEN15	7.3e-05	0.231511	0.385	0.39	1	TSEN15
ATXN10	1.4e-13	0.231509	0.671	0.676	5.11e-09	ATXN10
PIAS2	9.92e-08	0.231492	0.475	0.465	0.00363129	PIAS2
POLR2G	6.4e-07	0.231389	0.471	0.481	0.0234114	POLR2G
CCDC107	2.55e-08	0.231349	0.487	0.485	0.000933822	CCDC107
IGKC	9.25e-112	0.231341	0.121	0.008	3.39e-107	IGKC
NDRG1	2.31e-27	0.231193	0.221	0.109	8.45e-23	NDRG1
COPRS	1.44e-05	0.231082	0.474	0.5	0.526822	COPRS
MTRES1	1.48e-05	0.230899	0.345	0.331	0.541265	MTRES1
PFDN6	1.05e-07	0.23085	0.5	0.511	0.00384689	PFDN6
CTSC	9.14e-07	0.230691	0.504	0.513	0.0334367	CTSC
PNKD	3.46e-12	0.2306	0.766	0.773	1.27e-07	PNKD
TMEM256	4.09e-17	0.230367	0.802	0.799	1.5e-12	TMEM256
FHL1	4.22e-05	0.230041	0.348	0.338	1	FHL1
ENY2	3.52e-17	0.230024	0.779	0.767	1.29e-12	ENY2
TMEM161A	3.5e-13	0.22994	0.298	0.226	1.28e-08	TMEM161A
TBCB	1.14e-07	0.229881	0.524	0.531	0.00416129	TBCB
PLPPR4	3.42e-60	0.229746	0.158	0.038	1.25e-55	PLPPR4
CAPZB	3.53e-12	0.229579	0.693	0.711	1.29e-07	CAPZB
NDUFB10	1.06e-21	0.229097	0.913	0.913	3.87e-17	NDUFB10
TMEM219	3.26e-06	0.22881	0.501	0.528	0.119324	TMEM219
TMEM11	2.6e-07	0.228614	0.4	0.394	0.00952329	TMEM11
ARL4D	1.65e-13	0.228451	0.204	0.133	6.05e-09	ARL4D
TYMP	3.57e-13	0.228191	0.216	0.144	1.31e-08	TYMP
FLYWCH2	4.57e-06	0.228092	0.386	0.384	0.167265	FLYWCH2
VASP	0.000136041	0.227895	0.356	0.359	1	VASP
DANT2	1.1e-16	0.227615	0.285	0.192	4.02e-12	DANT2
PSMB6	4.2e-17	0.227482	0.863	0.832	1.54e-12	PSMB6
WDR54	1.14e-11	0.227115	0.465	0.406	4.18e-07	WDR54
MRPS21	1.6e-17	0.226657	0.852	0.837	5.86e-13	MRPS21
IFT43	0.000206436	0.226462	0.343	0.349	1	IFT43
DCXR	7.31e-15	0.226375	0.679	0.681	2.68e-10	DCXR
PTPRG	1.78e-06	0.22637	0.243	0.205	0.0650141	PTPRG
BOLA2	3.34e-05	0.226081	0.361	0.361	1	BOLA2
AP3S1	5.61e-05	0.226016	0.367	0.37	1	AP3S1
RIDA	6.39e-08	0.225928	0.354	0.325	0.00233918	RIDA
MAGEH1	9.19e-09	0.225702	0.299	0.253	0.000336372	MAGEH1
ABCA1	1.52e-19	0.224786	0.202	0.111	5.56e-15	ABCA1
ZDBF2	3.28e-07	0.224747	0.424	0.407	0.012007	ZDBF2
COPZ1	1.24e-06	0.22469	0.603	0.634	0.0453121	COPZ1
ORAI3	3.38e-08	0.224067	0.315	0.269	0.00123809	ORAI3
MPLKIP	0.00248106	0.223877	0.469	0.517	1	MPLKIP
GAPDH	4.61e-39	0.223854	0.996	0.997	1.69e-34	GAPDH
ESD	5.1e-11	0.223463	0.677	0.696	1.87e-06	ESD
HAX1	7.31e-09	0.223147	0.56	0.577	0.000267621	HAX1
TSC22D4	8.17e-06	0.22313	0.343	0.325	0.299099	TSC22D4
ERP29	2.12e-16	0.223057	0.797	0.801	7.76e-12	ERP29
PPIL3	9.27e-06	0.222791	0.293	0.267	0.339243	PPIL3
TLE5	2.45e-11	0.222641	0.791	0.824	8.96e-07	TLE5
AP000662.1	1.31e-21	0.222624	0.187	0.097	4.8e-17	AP000662.1
PPA2	4.83e-06	0.222401	0.405	0.403	0.176676	PPA2
RPA3	1.49e-05	0.221948	0.44	0.447	0.544671	RPA3
RER1	8.12e-07	0.221495	0.49	0.498	0.0297163	RER1
PRMT1	1e-15	0.221391	0.843	0.849	3.67e-11	PRMT1
ADGRL3	1.42e-10	0.221288	0.271	0.211	5.2e-06	ADGRL3
DNAJC19	3.69e-06	0.221216	0.547	0.579	0.135233	DNAJC19
CUTA	4.83e-15	0.221005	0.849	0.859	1.77e-10	CUTA
TNC	0.0402769	0.220917	0.206	0.195	1	TNC
SCRG1	1e-48	0.220822	0.143	0.038	3.67e-44	SCRG1
APEH	2.76e-08	0.220468	0.413	0.395	0.00100851	APEH
DHRS4L2	4.32e-07	0.220435	0.346	0.321	0.015819	DHRS4L2
H2AFJ	0.00348542	0.220253	0.467	0.516	1	H2AFJ
CA5B	2.3e-16	0.220241	0.151	0.081	8.41e-12	CA5B
HMCN1	3.01e-17	0.220204	0.215	0.131	1.1e-12	HMCN1
HSPA1B	4.82e-08	0.220135	0.196	0.145	0.0017633	HSPA1B
SREBF2	5.96e-07	0.219941	0.479	0.489	0.021806	SREBF2
HNRNPA0	6.06e-10	0.219918	0.633	0.659	2.22e-05	HNRNPA0
TMEM147	2.64e-09	0.219795	0.652	0.66	9.65e-05	TMEM147
MMP15	2.47e-07	0.219645	0.697	0.719	0.00903266	MMP15
COX7A1	7.06e-21	0.219485	0.174	0.085	2.58e-16	COX7A1
PLPP3	2.34e-14	0.219171	0.225	0.147	8.55e-10	PLPP3
C1QL1	8.12e-09	0.219127	0.2	0.147	0.000297368	C1QL1
SLC39A7	3.41e-06	0.219093	0.536	0.567	0.124817	SLC39A7
UBB	7.37e-15	0.219065	0.949	0.944	2.7e-10	UBB
NDUFV1	1.57e-13	0.218829	0.753	0.766	5.73e-09	NDUFV1
SLC25A3	1.43e-28	0.218533	0.986	0.979	5.23e-24	SLC25A3
TSPAN3	1.95e-10	0.218394	0.582	0.589	7.16e-06	TSPAN3
MTF2	0.000796124	0.218005	0.423	0.453	1	MTF2
ZNF385D	3.48e-76	0.217626	0.12	0.016	1.27e-71	ZNF385D
ACOT2	5.77e-31	0.217359	0.207	0.094	2.11e-26	ACOT2
HEXIM1	1.24e-05	0.216948	0.318	0.297	0.45408	HEXIM1
FIS1	2.08e-15	0.216829	0.815	0.802	7.6e-11	FIS1
HNRNPDL	7.19e-13	0.216726	0.896	0.87	2.63e-08	HNRNPDL
ATXN2L	5.52e-05	0.216356	0.309	0.293	1	ATXN2L
ACVR2B	4.06e-05	0.216192	0.499	0.516	1	ACVR2B
LPIN1	0.00104584	0.215866	0.357	0.362	1	LPIN1
TNFAIP3	1.18e-40	0.215659	0.141	0.042	4.33e-36	TNFAIP3
PPP1CA	8.44e-08	0.215419	0.586	0.597	0.00308846	PPP1CA
SHD	3.32e-08	0.215259	0.33	0.28	0.00121499	SHD
UQCC3	2.47e-06	0.215183	0.526	0.548	0.0903578	UQCC3
SPINK4	8.86e-68	0.214907	0.128	0.022	3.24e-63	SPINK4
RNF152	7.93e-38	0.214717	0.143	0.046	2.9e-33	RNF152
DPF2	0.00391435	0.213963	0.329	0.339	1	DPF2
FKBP10	1.3e-07	0.213857	0.47	0.476	0.00474511	FKBP10
ANAPC13	2.05e-05	0.213595	0.465	0.487	0.748777	ANAPC13
2023-03-02	1.07e-10	0.213431	0.282	0.223	3.91e-06	2023-03-02
RNF7	5.05e-15	0.212974	0.858	0.854	1.85e-10	RNF7
MCTS1	1.3e-06	0.212958	0.488	0.507	0.0475215	MCTS1
VPS25	1.88e-05	0.212952	0.49	0.52	0.687077	VPS25
COPB2	2.09e-08	0.212942	0.647	0.67	0.000766339	COPB2
NDFIP2	2.36e-06	0.212622	0.304	0.274	0.0862631	NDFIP2
ILK	1.74e-10	0.21259	0.66	0.674	6.38e-06	ILK
TMEM161B-AS1	4.36e-10	0.212493	0.576	0.558	1.6e-05	TMEM161B-AS1
ARPC1A	1.69e-10	0.212396	0.725	0.74	6.17e-06	ARPC1A
ARF3	5.04e-06	0.212159	0.489	0.514	0.184362	ARF3
HPRT1	4.07e-06	0.212055	0.272	0.241	0.148879	HPRT1
MRPL33	2.29e-11	0.212038	0.726	0.7	8.39e-07	MRPL33
SSU72	1.57e-07	0.211894	0.656	0.69	0.00572884	SSU72
INSIG2	2.84e-06	0.211754	0.391	0.372	0.103785	INSIG2
BTF3	5.05e-23	0.21156	0.979	0.962	1.85e-18	BTF3
ANKRD9	1.24e-06	0.211532	0.424	0.413	0.0455128	ANKRD9
ROGDI	9.86e-07	0.211436	0.484	0.491	0.036082	ROGDI
DPM3	0.0010118	0.211423	0.475	0.513	1	DPM3
MEIS2	1.82e-05	0.211366	0.813	0.849	0.667007	MEIS2
RORA	5.91e-09	0.211113	0.292	0.231	0.000216347	RORA
COA5	7.26e-06	0.21104	0.493	0.509	0.265691	COA5
MRPL32	9.03e-07	0.2106	0.492	0.496	0.033034	MRPL32
PHLDB2	0.0981647	0.21059	0.193	0.245	1	PHLDB2
NR6A1	4.24e-08	0.210518	0.278	0.229	0.00155133	NR6A1
POP5	0.000131402	0.209525	0.465	0.477	1	POP5
AC008124.1	3.84e-11	0.209381	0.251	0.183	1.4e-06	AC008124.1
SRSF6	1.35e-06	0.209225	0.446	0.444	0.0493355	SRSF6
RAMP2	2.53e-10	0.20905	0.148	0.094	9.28e-06	RAMP2
PHB2	9.9e-15	0.208739	0.779	0.78	3.62e-10	PHB2
MYL4	1.36e-16	0.208712	0.995	0.993	4.97e-12	MYL4
MDP1	1.65e-05	0.208596	0.344	0.331	0.602398	MDP1
MAD2L1BP	6.59e-07	0.208583	0.21	0.17	0.024104	MAD2L1BP
RPP25L	0.000126932	0.208491	0.428	0.444	1	RPP25L
TSEN34	0.00137417	0.208067	0.432	0.468	1	TSEN34
MRPS15	1.97e-08	0.207833	0.652	0.646	0.000721278	MRPS15
RBMX2	4.16e-05	0.207702	0.413	0.423	1	RBMX2
EGLN3	1.49e-05	0.207585	0.418	0.404	0.547104	EGLN3
CLEC11A	3.62e-05	0.207537	0.287	0.257	1	CLEC11A
GABARAPL2	1.46e-11	0.207449	0.785	0.8	5.33e-07	GABARAPL2
CCNI	2.24e-18	0.207333	0.934	0.928	8.2e-14	CCNI
ZNF768	8.36e-10	0.20689	0.252	0.194	3.06e-05	ZNF768
PANCR	2.29e-09	0.206878	0.25	0.19	8.37e-05	PANCR
INAFM2	1.35e-05	0.206761	0.334	0.306	0.494508	INAFM2
SMARCA1	1.6e-13	0.20625	0.84	0.834	5.87e-09	SMARCA1
EMC6	1.06e-07	0.20612	0.676	0.689	0.00388201	EMC6
EI24	1.24e-08	0.206086	0.554	0.564	0.000452616	EI24
IP6K2	0.00115323	0.206046	0.366	0.376	1	IP6K2
TMED10	2.7e-12	0.206041	0.721	0.732	9.87e-08	TMED10
NDUFA3	6.2e-12	0.20596	0.813	0.822	2.27e-07	NDUFA3
REX1BD	1.05e-09	0.205904	0.607	0.611	3.86e-05	REX1BD
NDFIP1	6.01e-07	0.205342	0.57	0.604	0.0219836	NDFIP1
MYO1D	4.93e-10	0.205225	0.2	0.14	1.81e-05	MYO1D
CCZ1	0.000173647	0.205197	0.234	0.21	1	CCZ1
ATG101	0.0017139	0.204948	0.281	0.278	1	ATG101
MAGOHB	0.000147468	0.204525	0.341	0.34	1	MAGOHB
PNISR	3.14e-21	0.20447	0.905	0.903	1.15e-16	PNISR
DPH3	0.00673645	0.204453	0.424	0.455	1	DPH3
TOM1L1	5.7e-06	0.204076	0.21	0.173	0.208681	TOM1L1
SCPEP1	2.57e-14	0.204034	0.2	0.127	9.39e-10	SCPEP1
HADHB	1.27e-08	0.203722	0.694	0.732	0.000463338	HADHB
KLF2	5.83e-15	0.203708	0.154	0.086	2.13e-10	KLF2
NCSTN	1.37e-06	0.203652	0.285	0.251	0.0501248	NCSTN
NDUFB1	1.39e-13	0.203501	0.921	0.901	5.09e-09	NDUFB1
ATP5MC2	2.38e-24	0.203413	0.981	0.97	8.7e-20	ATP5MC2
FASTK	0.000227392	0.203222	0.365	0.375	1	FASTK
NDUFC1	1.26e-09	0.203207	0.861	0.852	4.61e-05	NDUFC1
MID1IP1	2.36e-06	0.203146	0.238	0.2	0.0865596	MID1IP1
LIMS1	8.2e-06	0.203103	0.487	0.501	0.299973	LIMS1
COMMD2	0.00117343	0.202777	0.408	0.445	1	COMMD2
EBPL	0.000586543	0.20275	0.41	0.429	1	EBPL
NKTR	4.75e-13	0.202615	0.668	0.673	1.74e-08	NKTR
GPR108	1.01e-07	0.202496	0.272	0.228	0.00370852	GPR108
SETBP1	1.13e-06	0.202007	0.296	0.258	0.0414482	SETBP1
ACO2	1.81e-10	0.201847	0.701	0.729	6.61e-06	ACO2
EEF1G	6.5e-26	0.201629	0.992	0.984	2.38e-21	EEF1G
TMEM128	9.73e-14	0.201291	0.217	0.141	3.56e-09	TMEM128
GRIPAP1	9.56e-06	0.201012	0.357	0.339	0.349976	GRIPAP1
THAP4	0.00111628	0.20097	0.367	0.375	1	THAP4
POGZ	1.71e-06	0.2009	0.446	0.444	0.0625344	POGZ
COMMD7	9.56e-06	0.200866	0.585	0.621	0.349973	COMMD7
SMIM8	9.64e-05	0.200861	0.36	0.356	1	SMIM8
ZNF587	0.000229312	0.200767	0.28	0.26	1	ZNF587
GLRX3	3.86e-07	0.20062	0.591	0.612	0.0141355	GLRX3
C12orf45	0.000529985	0.200471	0.433	0.456	1	C12orf45
WDR83OS	1.75e-11	0.200406	0.792	0.807	6.41e-07	WDR83OS
NUP42	0.000737214	0.20035	0.324	0.322	1	NUP42
MRPL13	1.21e-08	0.200326	0.576	0.581	0.000442842	MRPL13
TMEM205	0.00129264	0.200069	0.422	0.449	1	TMEM205
PDZD11	8.17e-06	0.199857	0.437	0.448	0.299088	PDZD11
ANKRD37	2.93e-06	0.199793	0.185	0.141	0.107331	ANKRD37
RBM8A	1.11e-10	0.199707	0.795	0.8	4.06e-06	RBM8A
WDR18	0.000899563	0.199667	0.407	0.434	1	WDR18
NDUFAF5	0.00129086	0.19966	0.3	0.301	1	NDUFAF5
TMEM63B	1.74e-10	0.199626	0.27	0.205	6.36e-06	TMEM63B
PSENEN	1.04e-07	0.199534	0.546	0.557	0.00380727	PSENEN
CCDC115	3.73e-05	0.199443	0.269	0.239	1	CCDC115
RTCB	4.04e-05	0.199288	0.539	0.576	1	RTCB
RNF167	0.000185731	0.198992	0.42	0.437	1	RNF167
LOXL1	1.57e-06	0.198496	0.19	0.149	0.0574854	LOXL1
CADM1	0.00244179	0.198371	0.571	0.617	1	CADM1
TRIM8	0.000271439	0.19815	0.429	0.445	1	TRIM8
RYBP	0.000617088	0.197936	0.44	0.461	1	RYBP
HOXB2	0.318478	0.197662	0.242	0.259	1	HOXB2
PIGF	0.000184658	0.197646	0.271	0.25	1	PIGF
SF3B5	5.26e-11	0.197472	0.783	0.793	1.92e-06	SF3B5
NUDT22	1.03e-05	0.197411	0.4	0.398	0.377313	NUDT22
MRPL40	2.38e-05	0.197152	0.583	0.618	0.870056	MRPL40
SARNP	2.58e-06	0.197013	0.672	0.702	0.0944016	SARNP
PUDP	0.000495708	0.196896	0.265	0.25	1	PUDP
TTC32	1.75e-08	0.196655	0.222	0.168	0.000638801	TTC32
PLTP	0.000122846	0.19652	0.235	0.209	1	PLTP
PARK7	3.22e-14	0.196284	0.905	0.885	1.18e-09	PARK7
NECTIN2	7.7e-06	0.196224	0.538	0.558	0.281797	NECTIN2
GSTA4	3.06e-05	0.196035	0.323	0.302	1	GSTA4
SUPT7L	3.49e-06	0.196026	0.31	0.285	0.127854	SUPT7L
DNAJC4	7.58e-05	0.196021	0.467	0.483	1	DNAJC4
RBM42	0.00106634	0.19601	0.413	0.437	1	RBM42
RNF146	6.38e-05	0.195966	0.293	0.27	1	RNF146
LMO3	3.79e-14	0.195875	0.187	0.114	1.39e-09	LMO3
EIF4E	2.88e-05	0.195682	0.464	0.488	1	EIF4E
PTS	0.00613162	0.19561	0.369	0.391	1	PTS
SLC7A4	2.53e-68	0.195601	0.115	0.017	9.27e-64	SLC7A4
MRPS14	0.0186678	0.195482	0.345	0.372	1	MRPS14
MRPS28	5.65e-06	0.195452	0.494	0.508	0.20671	MRPS28
NID2	2.47e-11	0.195441	0.766	0.783	9.03e-07	NID2
IMPAD1	0.00471238	0.195361	0.427	0.469	1	IMPAD1
COX14	5.09e-10	0.19514	0.746	0.753	1.86e-05	COX14
CNTFR	7.16e-09	0.194967	0.202	0.148	0.000261883	CNTFR
TEX264	0.00224164	0.194914	0.399	0.419	1	TEX264
COTL1	4.24e-05	0.194825	0.278	0.254	1	COTL1
TCEA2	0.00203278	0.194379	0.462	0.501	1	TCEA2
BIN1	2.77e-12	0.194337	0.288	0.211	1.02e-07	BIN1
MOB4	7.19e-06	0.194113	0.569	0.607	0.26332	MOB4
NR4A1	2.65e-30	0.19396	0.12	0.039	9.72e-26	NR4A1
PDCD2	0.00742856	0.193828	0.44	0.488	1	PDCD2
FH	1.03e-06	0.193783	0.611	0.634	0.0375464	FH
FABP3	9.27e-11	0.193736	0.791	0.792	3.39e-06	FABP3
LIMA1	1.34e-07	0.193564	0.184	0.136	0.00490268	LIMA1
ANXA7	0.0133858	0.193331	0.367	0.392	1	ANXA7
SRSF4	9.09e-08	0.193168	0.639	0.674	0.00332885	SRSF4
HLA-C	9.65e-05	0.193133	0.253	0.224	1	HLA-C
GBE1	0.0290805	0.192891	0.36	0.382	1	GBE1
TSPAN13	0.459865	0.192887	0.279	0.313	1	TSPAN13
FBXL15	0.00300412	0.192804	0.306	0.306	1	FBXL15
SNX3	4.91e-13	0.192691	0.847	0.848	1.8e-08	SNX3
FAHD2B	2.47e-06	0.192339	0.258	0.223	0.0905167	FAHD2B
HMGCR	0.0327134	0.192333	0.35	0.378	1	HMGCR
ATP6V0E1	1.7e-07	0.192288	0.722	0.74	0.00621219	ATP6V0E1
MTFP1	6.32e-06	0.1922	0.448	0.441	0.23121	MTFP1
UBE2I	6.94e-07	0.192168	0.664	0.691	0.025395	UBE2I
LAMTOR3	0.000688401	0.192131	0.305	0.297	1	LAMTOR3
RBM15B	0.0025896	0.192039	0.301	0.302	1	RBM15B
HEXA	2.15e-06	0.191928	0.305	0.276	0.0788163	HEXA
CNPY3	0.00321967	0.19184	0.345	0.357	1	CNPY3
RAB34	0.00082002	0.191805	0.484	0.533	1	RAB34
MALT1	0.00221547	0.191742	0.462	0.498	1	MALT1
SLC9A3-AS1	5.33e-21	0.191733	0.21	0.114	1.95e-16	SLC9A3-AS1
LRRC61	1.23e-11	0.191489	0.193	0.128	4.5e-07	LRRC61
PIGP	0.004624	0.191443	0.431	0.462	1	PIGP
TUBG1	0.000539841	0.191394	0.392	0.406	1	TUBG1
TRMT10C	0.000296025	0.191334	0.433	0.459	1	TRMT10C
TXNDC12	9.88e-05	0.191257	0.426	0.443	1	TXNDC12
TSPYL1	0.0405029	0.191215	0.379	0.416	1	TSPYL1
TUFM	6.05e-08	0.191067	0.777	0.797	0.00221291	TUFM
FDX1	0.000306273	0.190598	0.44	0.471	1	FDX1
PSMD8	3.86e-10	0.190575	0.791	0.794	1.41e-05	PSMD8
THAP9-AS1	7.51e-09	0.190418	0.223	0.166	0.000274915	THAP9-AS1
ST20-AS1	7.07e-10	0.190401	0.183	0.127	2.59e-05	ST20-AS1
CHPF	0.00769532	0.190035	0.394	0.427	1	CHPF
CAMTA1	2.28e-10	0.189615	0.79	0.805	8.34e-06	CAMTA1
ALDOC	4.9e-05	0.189591	0.433	0.433	1	ALDOC
TMEM8A	0.0211281	0.189524	0.345	0.37	1	TMEM8A
JARID2	0.00011157	0.189467	0.366	0.353	1	JARID2
TSTA3	0.0054161	0.189445	0.3	0.311	1	TSTA3
CD46	0.00440619	0.18938	0.512	0.576	1	CD46
AL645568.1	4.49e-16	0.189376	0.164	0.091	1.64e-11	AL645568.1
RNASET2	2.32e-05	0.189312	0.225	0.192	0.84861	RNASET2
CACUL1	0.0722009	0.189279	0.363	0.405	1	CACUL1
SEC11A	4.31e-09	0.189257	0.802	0.816	0.000157777	SEC11A
NFU1	0.000282943	0.189253	0.481	0.514	1	NFU1
ISCA1	0.000266756	0.189161	0.49	0.531	1	ISCA1
HNRNPA2B1	2.11e-17	0.189094	0.968	0.957	7.73e-13	HNRNPA2B1
PKIB	5.93e-07	0.189031	0.234	0.185	0.021714	PKIB
ZNF608	0.00164455	0.188672	0.493	0.527	1	ZNF608
PRCC	0.000414172	0.188616	0.42	0.442	1	PRCC
BDH2	0.00018096	0.188515	0.397	0.4	1	BDH2
SRP19	1.05e-05	0.188324	0.592	0.622	0.384971	SRP19
BAD	0.00738867	0.188305	0.466	0.514	1	BAD
WDR61	0.00988999	0.18805	0.361	0.389	1	WDR61
MRPL43	0.000406232	0.187434	0.5	0.548	1	MRPL43
AC021504.1	1.48e-14	0.187257	0.237	0.153	5.42e-10	AC021504.1
UXT	8.39e-09	0.18723	0.655	0.679	0.000307237	UXT
POLR2I	3.99e-08	0.187172	0.738	0.76	0.00146006	POLR2I
RAMAC	4.77e-07	0.186944	0.25	0.21	0.0174756	RAMAC
RPS27A	8.2e-23	0.186856	1	0.991	3e-18	RPS27A
VWDE	1.96e-08	0.186747	0.266	0.207	0.000717663	VWDE
MFF	0.00242368	0.186724	0.498	0.555	1	MFF
HINT2	0.000138179	0.186528	0.513	0.556	1	HINT2
PRELID2	3.41e-07	0.186515	0.27	0.223	0.0124986	PRELID2
DEGS1	0.0107302	0.186456	0.36	0.383	1	DEGS1
CMC2	1.91e-06	0.186454	0.589	0.59	0.0700541	CMC2
SYPL1	0.0176262	0.186293	0.409	0.452	1	SYPL1
GLT8D1	0.0838289	0.18608	0.279	0.3	1	GLT8D1
SESN3	0.0985491	0.18602	0.322	0.351	1	SESN3
PNN	0.000378392	0.18599	0.755	0.781	1	PNN
TGFB2	7.86e-08	0.185691	0.55	0.53	0.00287658	TGFB2
PRPS1	0.00128066	0.185607	0.268	0.26	1	PRPS1
PET100	1.12e-09	0.185599	0.712	0.733	4.12e-05	PET100
TLE4	0.00129246	0.185286	0.26	0.243	1	TLE4
PSMD9	1.81e-05	0.185277	0.54	0.562	0.661705	PSMD9
SNRPD2	2.91e-08	0.185138	0.851	0.848	0.0010641	SNRPD2
MORN2	0.0159724	0.184684	0.282	0.293	1	MORN2
METTL5	0.00304566	0.184626	0.516	0.568	1	METTL5
SELENOF	0.000526238	0.184508	0.437	0.462	1	SELENOF
B4GAT1	1.63e-06	0.184302	0.349	0.321	0.0597	B4GAT1
ZNF462	0.00476776	0.184295	0.406	0.433	1	ZNF462
USB1	0.0120502	0.184235	0.308	0.322	1	USB1
ARF6	0.024668	0.184119	0.273	0.284	1	ARF6
PFDN4	0.00326946	0.184067	0.452	0.495	1	PFDN4
SGPP2	5.41e-06	0.183836	0.406	0.371	0.198153	SGPP2
PSMB4	9.61e-06	0.183365	0.625	0.659	0.351782	PSMB4
IDI1	0.00422974	0.183299	0.531	0.539	1	IDI1
MPG	0.000330772	0.183282	0.463	0.5	1	MPG
TIMMDC1	1.92e-06	0.183252	0.589	0.609	0.0704124	TIMMDC1
GPC2	3.19e-07	0.183133	0.217	0.172	0.0116748	GPC2
FIBP	1.75e-05	0.183082	0.571	0.591	0.639313	FIBP
SELENOP	1.55e-06	0.182945	0.348	0.308	0.0566481	SELENOP
SEPHS2	0.00274755	0.182786	0.401	0.424	1	SEPHS2
ZFP36	2.28e-22	0.182666	0.122	0.049	8.35e-18	ZFP36
FGFR3	5.15e-33	0.182643	0.156	0.058	1.88e-28	FGFR3
GBA2	0.000136833	0.182471	0.424	0.438	1	GBA2
THOC6	5.55e-05	0.18243	0.209	0.177	1	THOC6
OTUD5	9.06e-05	0.182293	0.27	0.246	1	OTUD5
CCDC58	0.0022769	0.182106	0.329	0.338	1	CCDC58
LAP3	0.00866262	0.181972	0.449	0.493	1	LAP3
GOLGA8B	7.27e-12	0.181884	0.257	0.182	2.66e-07	GOLGA8B
SRSF3	1.43e-09	0.181855	0.832	0.797	5.23e-05	SRSF3
ACP1	3.64e-07	0.181854	0.653	0.673	0.0133182	ACP1
YTHDF2	3.98e-05	0.181687	0.538	0.571	1	YTHDF2
SMIM20	0.0124007	0.181656	0.388	0.421	1	SMIM20
AL360012.1	1.72e-41	0.181558	0.111	0.027	6.29e-37	AL360012.1
GOSR1	0.0110647	0.181439	0.373	0.399	1	GOSR1
FAM199X	0.000113059	0.181236	0.353	0.345	1	FAM199X
PTCH2	1.68e-39	0.180644	0.122	0.033	6.14e-35	PTCH2
PSMB7	2.64e-08	0.180411	0.704	0.713	0.000967708	PSMB7
PCBP1	7.78e-11	0.180328	0.837	0.853	2.85e-06	PCBP1
USP9X	7.51e-07	0.180231	0.675	0.718	0.0274786	USP9X
RPP21	0.00660832	0.180184	0.415	0.449	1	RPP21
TCF3	0.0286303	0.180174	0.302	0.316	1	TCF3
KHSRP	0.00470488	0.179968	0.436	0.47	1	KHSRP
NUDCD2	0.000115571	0.179889	0.435	0.447	1	NUDCD2
CIART	1.59e-13	0.17961	0.145	0.08	5.82e-09	CIART
CD99L2	9.41e-06	0.179556	0.241	0.205	0.344314	CD99L2
MFSD10	0.0133168	0.179474	0.363	0.393	1	MFSD10
LINC00667	0.0147084	0.179471	0.353	0.375	1	LINC00667
VAPA	4.11e-07	0.17935	0.741	0.76	0.0150279	VAPA
DARS	1.64e-11	0.179283	0.722	0.747	6.01e-07	DARS
MZT2A	1.9e-07	0.179248	0.673	0.697	0.00695252	MZT2A
ZNF552	6.24e-06	0.179233	0.146	0.109	0.228324	ZNF552
MKNK2	0.00114653	0.179048	0.256	0.239	1	MKNK2
SLC5A3	2.11e-05	0.17903	0.403	0.394	0.771813	SLC5A3
C1orf56	2.61e-07	0.178892	0.171	0.125	0.00955513	C1orf56
AL118516.1	4.27e-14	0.178673	0.13	0.068	1.56e-09	AL118516.1
TALDO1	5.65e-06	0.178633	0.605	0.639	0.206834	TALDO1
RABAC1	2.04e-05	0.178311	0.674	0.702	0.747669	RABAC1
NIPSNAP1	0.000335809	0.178082	0.49	0.524	1	NIPSNAP1
EFCAB2	0.0490767	0.177407	0.307	0.324	1	EFCAB2
JOSD2	0.822986	0.177292	0.222	0.253	1	JOSD2
CCNC	0.0107556	0.177049	0.348	0.371	1	CCNC
PDCL3	0.102055	0.176903	0.332	0.368	1	PDCL3
ATP6AP1	0.0340255	0.176704	0.411	0.459	1	ATP6AP1
OTUD6B-AS1	9.58e-06	0.176695	0.582	0.609	0.35063	OTUD6B-AS1
IL13RA1	0.00564108	0.17658	0.247	0.24	1	IL13RA1
SLIT2	0.364084	0.17657	0.326	0.365	1	SLIT2
GPR162	4.59e-09	0.176538	0.148	0.098	0.000167984	GPR162
TMEM14C	1.42e-11	0.176506	0.904	0.9	5.19e-07	TMEM14C
FUNDC1	0.0398536	0.176505	0.335	0.364	1	FUNDC1
MRPS12	9.13e-05	0.176078	0.588	0.626	1	MRPS12
MYL6B	3.2e-07	0.175629	0.688	0.726	0.0116977	MYL6B
TCEAL1	0.000506773	0.175583	0.234	0.211	1	TCEAL1
HMGN4	0.00452716	0.175552	0.315	0.322	1	HMGN4
MRPL17	2.47e-05	0.175539	0.543	0.572	0.905863	MRPL17
PLIN2	0.000555256	0.175342	0.48	0.487	1	PLIN2
NUDT7	7.32e-11	0.175179	0.189	0.127	2.68e-06	NUDT7
CMTM6	0.014793	0.175117	0.303	0.311	1	CMTM6
ARL2	1.7e-06	0.174988	0.652	0.68	0.0622797	ARL2
FUT8	1.28e-06	0.174974	0.198	0.156	0.0467472	FUT8
HNRNPF	6.46e-05	0.174837	0.614	0.636	1	HNRNPF
COL1A1	0.115475	0.174807	0.558	0.603	1	COL1A1
PRRC2A	0.00130971	0.174594	0.489	0.531	1	PRRC2A
SPPL3	0.00328133	0.174477	0.365	0.379	1	SPPL3
ARF1	5.76e-09	0.17436	0.842	0.867	0.000210954	ARF1
TIMM17A	0.00599144	0.174342	0.514	0.551	1	TIMM17A
CIB2	0.0327908	0.174341	0.457	0.507	1	CIB2
SERINC5	4.46e-05	0.174323	0.312	0.281	1	SERINC5
POLD2	0.00145641	0.174188	0.498	0.54	1	POLD2
TAF12	0.009079	0.174178	0.35	0.371	1	TAF12
SMIM19	0.000106479	0.17406	0.551	0.584	1	SMIM19
C19orf53	1.59e-08	0.173912	0.853	0.854	0.000581059	C19orf53
P4HB	1.48e-06	0.17369	0.718	0.756	0.0541899	P4HB
ARID1B	0.000127927	0.173618	0.573	0.615	1	ARID1B
UBE2Z	0.072575	0.173421	0.374	0.418	1	UBE2Z
MEX3A	0.0270381	0.173418	0.441	0.489	1	MEX3A
HIBCH	0.0108671	0.173192	0.328	0.343	1	HIBCH
TSPAN31	0.00235963	0.173118	0.268	0.257	1	TSPAN31
SHARPIN	0.293782	0.173093	0.289	0.323	1	SHARPIN
GALC	8.7e-05	0.173062	0.234	0.204	1	GALC
ZSWIM7	0.000152143	0.173053	0.539	0.584	1	ZSWIM7
DENND10	0.0146929	0.172985	0.376	0.405	1	DENND10
FBLN2	3e-11	0.172644	0.186	0.123	1.1e-06	FBLN2
SURF4	0.00613512	0.172286	0.431	0.471	1	SURF4
FEM1B	0.00772496	0.172241	0.466	0.507	1	FEM1B
SEC22B	0.552615	0.172204	0.294	0.334	1	SEC22B
ACY1	9.53e-05	0.172074	0.282	0.26	1	ACY1
DNPH1	0.00228861	0.171876	0.487	0.526	1	DNPH1
PHKB	4.18e-05	0.171589	0.588	0.626	1	PHKB
KLHL9	0.570409	0.171572	0.27	0.305	1	KLHL9
LSM1	1.23e-06	0.171531	0.55	0.55	0.0450576	LSM1
SUPT4H1	0.00293397	0.171414	0.533	0.593	1	SUPT4H1
RNF170	9.46e-05	0.171214	0.253	0.224	1	RNF170
TMEM258	6.46e-09	0.171077	0.825	0.843	0.000236302	TMEM258
OLFM2	2.91e-17	0.170863	0.143	0.072	1.07e-12	OLFM2
DENND4C	4.26e-05	0.170758	0.231	0.2	1	DENND4C
MFSD3	0.00149191	0.170713	0.308	0.303	1	MFSD3
SLC25A13	0.0538195	0.170656	0.331	0.358	1	SLC25A13
ELF3	1.41e-12	0.170559	0.148	0.085	5.18e-08	ELF3
MRPL16	0.00784469	0.170513	0.45	0.495	1	MRPL16
AP5M1	0.00408376	0.170503	0.374	0.388	1	AP5M1
TBRG4	0.0103539	0.170497	0.33	0.346	1	TBRG4
LETMD1	5.16e-05	0.170443	0.236	0.203	1	LETMD1
DUSP12	0.0498001	0.170414	0.223	0.223	1	DUSP12
CLCN5	0.00893326	0.170331	0.195	0.183	1	CLCN5
LRRN4	2.97e-05	0.17003	0.169	0.135	1	LRRN4
BBX	4.09e-06	0.169808	0.679	0.723	0.149843	BBX
ANAPC11	9.39e-09	0.169716	0.848	0.835	0.000343625	ANAPC11
CRELD1	0.0010578	0.169664	0.371	0.371	1	CRELD1
MRPS18C	0.000611686	0.169625	0.555	0.593	1	MRPS18C
AL049838.1	4.51e-08	0.169611	0.203	0.148	0.00165048	AL049838.1
LINC01578	5.12e-08	0.169435	0.686	0.72	0.00187364	LINC01578
RPL15	8.11e-20	0.169394	1	0.991	2.97e-15	RPL15
C19orf12	0.0711863	0.169328	0.28	0.299	1	C19orf12
NACA	5.47e-22	0.169241	0.992	0.987	2e-17	NACA
BET1	0.00534656	0.169197	0.269	0.26	1	BET1
C11orf1	0.0133296	0.169084	0.303	0.307	1	C11orf1
MRPL4	0.00830793	0.16893	0.495	0.554	1	MRPL4
BLOC1S4	0.00140655	0.168902	0.378	0.386	1	BLOC1S4
COX17	1.01e-05	0.168794	0.792	0.77	0.370239	COX17
TMEM179B	0.157328	0.168783	0.331	0.368	1	TMEM179B
IER5	3.39e-10	0.168783	0.156	0.1	1.24e-05	IER5
SLC29A4	6.74e-14	0.168686	0.15	0.086	2.47e-09	SLC29A4
CD276	0.00644894	0.168586	0.238	0.232	1	CD276
P3H2	0.0467758	0.168575	0.335	0.352	1	P3H2
TMEM251	0.0958021	0.168503	0.263	0.277	1	TMEM251
PITHD1	0.066145	0.168467	0.409	0.454	1	PITHD1
DMAC1	4.75e-07	0.168346	0.762	0.793	0.0174	DMAC1
SWI5	0.0137889	0.168255	0.446	0.492	1	SWI5
TMEM9	0.0058013	0.168068	0.449	0.486	1	TMEM9
ATG5	0.00773786	0.167519	0.311	0.322	1	ATG5
EIF3I	3.31e-06	0.167361	0.714	0.74	0.121097	EIF3I
CDKN2AIPNL	0.0996704	0.167322	0.332	0.362	1	CDKN2AIPNL
ASNSD1	0.0797235	0.167173	0.248	0.259	1	ASNSD1
NDUFA4L2	1.6e-07	0.167109	0.108	0.065	0.00585992	NDUFA4L2
MRPS16	0.00304204	0.16701	0.563	0.617	1	MRPS16
DCTN6	0.0143243	0.166875	0.395	0.431	1	DCTN6
BCKDHB	3.38e-05	0.166868	0.272	0.245	1	BCKDHB
SNRPE	8.27e-06	0.166853	0.757	0.775	0.302689	SNRPE
DRAM2	0.0016986	0.16674	0.306	0.297	1	DRAM2
S100A4	9.84e-06	0.16662	0.481	0.463	0.360137	S100A4
UQCRC1	1.7e-07	0.16656	0.797	0.81	0.0062053	UQCRC1
TBCC	0.00393376	0.166252	0.246	0.234	1	TBCC
NDUFA9	0.0169491	0.166236	0.481	0.541	1	NDUFA9
SAR1A	0.0654598	0.166214	0.404	0.451	1	SAR1A
ERO1A	0.000276738	0.166196	0.434	0.435	1	ERO1A
TP53I13	0.10521	0.166161	0.247	0.262	1	TP53I13
PARL	0.0586293	0.166022	0.375	0.415	1	PARL
C5orf15	0.00313315	0.166012	0.353	0.365	1	C5orf15
VDAC2	2.67e-18	0.166001	0.964	0.95	9.79e-14	VDAC2
PTOV1	1.58e-06	0.165948	0.627	0.655	0.0578415	PTOV1
AK4	1.41e-05	0.165893	0.649	0.679	0.514905	AK4
MALSU1	0.00317598	0.165789	0.439	0.472	1	MALSU1
TRAPPC2L	0.00913277	0.165697	0.488	0.55	1	TRAPPC2L
AC010642.2	0.0483612	0.165576	0.382	0.424	1	AC010642.2
METTL9	1.87e-06	0.165511	0.628	0.673	0.0685561	METTL9
VPS28	5.97e-08	0.165475	0.735	0.766	0.00218425	VPS28
CDC42SE1	0.011525	0.165353	0.335	0.351	1	CDC42SE1
TM9SF4	0.000383286	0.165268	0.381	0.38	1	TM9SF4
NDUFB6	0.000600082	0.165158	0.679	0.704	1	NDUFB6
GADD45G	2.33e-11	0.165114	0.321	0.256	8.54e-07	GADD45G
TNKS1BP1	0.0117399	0.165047	0.234	0.227	1	TNKS1BP1
TOMM6	2.28e-06	0.164834	0.779	0.795	0.0833726	TOMM6
PHC2	0.0171547	0.164584	0.222	0.215	1	PHC2
LDLR	0.0666261	0.164336	0.296	0.309	1	LDLR
GFOD1	0.00673124	0.164166	0.248	0.239	1	GFOD1
SOCS2	0.0691354	0.164105	0.272	0.283	1	SOCS2
RABGGTB	0.0100871	0.16405	0.282	0.284	1	RABGGTB
PPP1R10	0.00376477	0.164001	0.509	0.552	1	PPP1R10
TRNAU1AP	0.282079	0.163817	0.324	0.363	1	TRNAU1AP
NUTF2	2.61e-05	0.163701	0.6	0.62	0.953836	NUTF2
ST3GAL2	0.00281453	0.163665	0.284	0.278	1	ST3GAL2
YIF1A	0.0904089	0.163631	0.416	0.472	1	YIF1A
COA6	0.0225031	0.163563	0.482	0.53	1	COA6
ARID3B	0.185055	0.163526	0.337	0.374	1	ARID3B
PUM1	4.44e-05	0.163346	0.631	0.674	1	PUM1
PLEKHJ1	1.75e-06	0.163323	0.741	0.77	0.063913	PLEKHJ1
MRPL44	0.00877124	0.163283	0.384	0.414	1	MRPL44
TMEM129	0.000773601	0.163203	0.268	0.25	1	TMEM129
DCTN3	0.000499114	0.163152	0.576	0.6	1	DCTN3
SLC12A5	0.000268908	0.162974	0.208	0.181	1	SLC12A5
ESYT1	0.321632	0.16288	0.227	0.247	1	ESYT1
RNPEP	0.000463937	0.162877	0.224	0.201	1	RNPEP
MIR99AHG	6.9e-06	0.1628	0.337	0.3	0.252639	MIR99AHG
AC244090.1	0.000992031	0.162665	0.203	0.18	1	AC244090.1
EXT2	0.0175508	0.162566	0.195	0.184	1	EXT2
ECI2	6.97e-06	0.162469	0.636	0.675	0.255171	ECI2
ANAPC4	0.00217387	0.162452	0.209	0.193	1	ANAPC4
SYNGR1	0.00205219	0.162097	0.542	0.605	1	SYNGR1
TIMM8B	6.16e-07	0.161846	0.852	0.821	0.0225604	TIMM8B
RETREG2	0.0238736	0.161814	0.326	0.344	1	RETREG2
FAM49B	0.0282291	0.161744	0.422	0.463	1	FAM49B
PSMD13	8.44e-05	0.161696	0.54	0.566	1	PSMD13
SOCS3	7.56e-10	0.161537	0.15	0.095	2.77e-05	SOCS3
AAMDC	0.00240485	0.161532	0.462	0.497	1	AAMDC
NRP1	0.0127202	0.161356	0.491	0.518	1	NRP1
WDR6	0.00994958	0.161243	0.414	0.448	1	WDR6
MEA1	0.00143593	0.161201	0.524	0.572	1	MEA1
RAB11A	2.5e-05	0.161153	0.658	0.689	0.915392	RAB11A
LAMP1	0.0323532	0.161065	0.403	0.446	1	LAMP1
RPS7	6.52e-18	0.16097	0.996	0.989	2.38e-13	RPS7
SNX14	0.0187595	0.160957	0.307	0.318	1	SNX14
MIEF1	0.105139	0.160785	0.338	0.372	1	MIEF1
TMX4	0.00735158	0.160768	0.498	0.538	1	TMX4
SURF1	0.167493	0.160762	0.383	0.435	1	SURF1
CRLS1	0.0374049	0.16063	0.421	0.463	1	CRLS1
EID2	0.11949	0.160592	0.375	0.42	1	EID2
C1orf21	0.271667	0.160587	0.31	0.336	1	C1orf21
STARD3NL	0.0214422	0.160522	0.481	0.525	1	STARD3NL
CCDC3	3.19e-06	0.160423	0.152	0.113	0.116861	CCDC3
RASGRP2	0.330878	0.160323	0.325	0.367	1	RASGRP2
XXYLT1	0.179686	0.160257	0.296	0.324	1	XXYLT1
GDF11	0.117694	0.160164	0.44	0.489	1	GDF11
CHMP5	0.00206773	0.159985	0.588	0.659	1	CHMP5
SELENOW	1.38e-17	0.159964	0.988	0.981	5.05e-13	SELENOW
OAT	0.00855876	0.159822	0.187	0.174	1	OAT
SNRNP25	0.000272051	0.159748	0.584	0.607	1	SNRNP25
DIPK1B	0.0521275	0.159657	0.443	0.503	1	DIPK1B
CDC26	0.0300774	0.159527	0.341	0.364	1	CDC26
MRS2	0.0104323	0.15952	0.421	0.454	1	MRS2
ALG13	0.00266131	0.159427	0.24	0.226	1	ALG13
TRA2A	0.00753445	0.159386	0.393	0.417	1	TRA2A
AC092329.4	3.79e-07	0.159289	0.167	0.121	0.0138886	AC092329.4
PLOD1	0.0789944	0.159198	0.422	0.478	1	PLOD1
TMEM132A	0.0370589	0.158903	0.344	0.371	1	TMEM132A
MFGE8	0.00412121	0.158822	0.557	0.606	1	MFGE8
TDP2	0.151963	0.158574	0.326	0.358	1	TDP2
EGLN1	0.00874879	0.158557	0.5	0.549	1	EGLN1
IDH2	1.57e-08	0.158299	0.848	0.883	0.000576366	IDH2
TIGAR	0.0720807	0.158283	0.222	0.227	1	TIGAR
COMMD3	0.0174963	0.158084	0.392	0.427	1	COMMD3
MRFAP1	4.57e-07	0.157671	0.839	0.845	0.0167233	MRFAP1
MAPRE1	0.000216113	0.157649	0.549	0.579	1	MAPRE1
POLR2E	0.000397212	0.157594	0.612	0.671	1	POLR2E
ANAPC10	0.0703054	0.157493	0.231	0.236	1	ANAPC10
SCYL1	0.102022	0.157488	0.358	0.399	1	SCYL1
ACTN3	7.11e-24	0.15721	0.146	0.06	2.6e-19	ACTN3
TRPT1	0.0998181	0.157114	0.349	0.383	1	TRPT1
BABAM2	0.000315016	0.157113	0.259	0.236	1	BABAM2
PRPF38A	0.035801	0.156856	0.36	0.388	1	PRPF38A
MRVI1	9.32e-21	0.156518	0.108	0.043	3.41e-16	MRVI1
MED28	0.319701	0.15645	0.407	0.47	1	MED28
TMEM248	0.0346587	0.156418	0.34	0.367	1	TMEM248
AC007325.4	3.9e-11	0.156329	0.251	0.172	1.43e-06	AC007325.4
IST1	0.316055	0.156305	0.437	0.513	1	IST1
PSMD3	0.00130249	0.156291	0.469	0.514	1	PSMD3
CYB5A	2.01e-06	0.156186	0.724	0.754	0.0734937	CYB5A
PTP4A2	6.34e-07	0.156074	0.777	0.805	0.0231955	PTP4A2
DDAH2	0.0533532	0.156045	0.48	0.535	1	DDAH2
FADS2	0.621771	0.155942	0.323	0.372	1	FADS2
ZNF618	0.125356	0.155911	0.255	0.266	1	ZNF618
TNFRSF10B	0.000320268	0.155893	0.214	0.187	1	TNFRSF10B
SALL2	0.0146776	0.155779	0.184	0.171	1	SALL2
KLHL7	0.0650085	0.155692	0.29	0.307	1	KLHL7
FZD3	0.233414	0.155476	0.324	0.358	1	FZD3
DLD	0.00224518	0.15536	0.576	0.624	1	DLD
FOXP4	0.0228508	0.155316	0.247	0.246	1	FOXP4
CEBPB	0.0183733	0.155313	0.219	0.207	1	CEBPB
MAPKBP1	1.19e-05	0.155309	0.242	0.203	0.436447	MAPKBP1
NOSIP	0.00418814	0.154884	0.507	0.561	1	NOSIP
ARL2BP	0.000115554	0.15486	0.529	0.565	1	ARL2BP
COPS9	5.25e-07	0.154836	0.83	0.818	0.0192234	COPS9
HINT1	2.35e-10	0.154766	0.968	0.949	8.61e-06	HINT1
HSD11B1L	0.00324759	0.154761	0.191	0.171	1	HSD11B1L
DERL2	0.41043	0.154638	0.272	0.304	1	DERL2
TMEM230	0.00069427	0.154496	0.531	0.572	1	TMEM230
MDFI	0.00611088	0.15449	0.235	0.222	1	MDFI
STARD10	0.0121195	0.154487	0.272	0.27	1	STARD10
GRIA3	6.02e-09	0.154454	0.157	0.105	0.000220355	GRIA3
SDC3	0.0129009	0.154439	0.382	0.403	1	SDC3
MASP1	0.935984	0.15442	0.649	0.747	1	MASP1
TXNL1	0.00133164	0.154351	0.616	0.675	1	TXNL1
NDUFAF1	0.0426105	0.154253	0.237	0.241	1	NDUFAF1
SPOP	0.24344	0.154065	0.361	0.408	1	SPOP
OCIAD2	0.516978	0.154043	0.307	0.349	1	OCIAD2
PIGX	0.330742	0.154017	0.272	0.302	1	PIGX
FBXL12	0.01045	0.153916	0.206	0.194	1	FBXL12
ZNF706	0.0579655	0.153908	0.529	0.583	1	ZNF706
TSPAN14	0.00229953	0.153691	0.208	0.188	1	TSPAN14
CHID1	0.00975472	0.153678	0.475	0.526	1	CHID1
PITPNA-AS1	0.344363	0.153529	0.297	0.33	1	PITPNA-AS1
AC004556.3	0.00927202	0.153413	0.233	0.225	1	AC004556.3
MAIP1	0.0779315	0.153327	0.23	0.236	1	MAIP1
DNPEP	0.00162693	0.153325	0.351	0.352	1	DNPEP
SLC18B1	1.14e-07	0.153266	0.166	0.118	0.00417446	SLC18B1
DGCR6	1.75e-11	0.153253	0.208	0.135	6.41e-07	DGCR6
STT3A	0.0754239	0.153183	0.25	0.259	1	STT3A
P3H4	0.449804	0.153169	0.361	0.418	1	P3H4
GCSH	7.15e-06	0.15281	0.66	0.652	0.261739	GCSH
BEND5	0.00141358	0.152722	0.201	0.175	1	BEND5
AHSA1	0.00366404	0.152604	0.501	0.531	1	AHSA1
AMACR	0.000641293	0.152566	0.184	0.159	1	AMACR
TSG101	0.0610729	0.152565	0.474	0.537	1	TSG101
ZNRD1	0.189973	0.152522	0.29	0.32	1	ZNRD1
FAM222A	0.000520399	0.152494	0.199	0.174	1	FAM222A
MTHFD1L	0.112317	0.152347	0.346	0.386	1	MTHFD1L
ALG5	0.0278081	0.152269	0.257	0.258	1	ALG5
CIAO2A	0.300649	0.152258	0.401	0.464	1	CIAO2A
SDF2	0.399576	0.15225	0.305	0.347	1	SDF2
GGPS1	0.0839618	0.152205	0.298	0.317	1	GGPS1
VBP1	0.000198732	0.152038	0.584	0.611	1	VBP1
MN1	1.05e-14	0.152034	0.158	0.086	3.85e-10	MN1
TNNC2	3.26e-05	0.151952	0.169	0.128	1	TNNC2
DERA	0.00297135	0.151933	0.251	0.238	1	DERA
SLC39A13	0.000346303	0.151921	0.182	0.155	1	SLC39A13
BCKDK	0.0554367	0.151919	0.409	0.454	1	BCKDK
MPPED2	0.108232	0.15187	0.375	0.407	1	MPPED2
MDM4	0.0570691	0.151807	0.449	0.497	1	MDM4
EMC2	0.0350681	0.151534	0.388	0.422	1	EMC2
YIPF4	0.20908	0.151316	0.367	0.409	1	YIPF4
TPST2	0.000365935	0.151295	0.211	0.186	1	TPST2
SLC44A1	0.0213524	0.15129	0.24	0.233	1	SLC44A1
NUP37	0.530543	0.151265	0.233	0.259	1	NUP37
ZNF292	5.19e-06	0.151243	0.73	0.773	0.1901	ZNF292
TMED1	0.509339	0.151121	0.404	0.479	1	TMED1
BX284668.5	0.00275771	0.151089	0.205	0.185	1	BX284668.5
MRPL50	0.461445	0.150939	0.353	0.408	1	MRPL50
STK16	0.00754958	0.150939	0.258	0.249	1	STK16
UNC119	0.235811	0.150877	0.282	0.309	1	UNC119
LRCH2	0.00502175	0.150676	0.174	0.156	1	LRCH2
GSTZ1	0.0353059	0.150369	0.338	0.362	1	GSTZ1
PGLS	3.26e-05	0.150229	0.617	0.679	1	PGLS
BLOC1S1	0.00288927	0.150209	0.612	0.633	1	BLOC1S1
KRAS	0.0428675	0.150207	0.483	0.539	1	KRAS
AL158152.1	7.3e-07	0.150193	0.182	0.134	0.0267088	AL158152.1
APMAP	0.204378	0.150174	0.24	0.256	1	APMAP
TTC28	0.0635453	0.150069	0.303	0.317	1	TTC28
MAMDC4	6.87e-19	0.149984	0.121	0.054	2.51e-14	MAMDC4
ARL6IP4	5.01e-06	0.149957	0.828	0.824	0.183309	ARL6IP4
AKR1C1	1.05e-06	0.149956	0.12	0.081	0.0382582	AKR1C1
GSTM3	0.124507	0.149913	0.405	0.447	1	GSTM3
UBE2E3	0.000140419	0.149878	0.63	0.677	1	UBE2E3
UBE2E1	0.0237516	0.14982	0.466	0.522	1	UBE2E1
ARGLU1	9.19e-07	0.149786	0.749	0.786	0.0336221	ARGLU1
PYURF	0.0632705	0.149773	0.536	0.602	1	PYURF
MRPS24	1.08e-05	0.149735	0.766	0.779	0.393833	MRPS24
UBLCP1	0.145628	0.1497	0.265	0.281	1	UBLCP1
RNF5	0.000783316	0.149439	0.585	0.639	1	RNF5
SUSD4	2.51e-14	0.149329	0.152	0.085	9.19e-10	SUSD4
C16orf74	0.00017082	0.14929	0.275	0.247	1	C16orf74
TNFAIP8	0.0248306	0.149234	0.286	0.288	1	TNFAIP8
CD59	3.9e-05	0.14921	0.591	0.629	1	CD59
ZDHHC4	0.00685536	0.148979	0.368	0.385	1	ZDHHC4
RBPJ	0.00262611	0.148822	0.582	0.644	1	RBPJ
GPAM	0.942698	0.148806	0.251	0.29	1	GPAM
PHLDA1	9.29e-05	0.148739	0.187	0.153	1	PHLDA1
MKKS	0.206532	0.14871	0.306	0.34	1	MKKS
NOVA1	0.0316789	0.148503	0.42	0.459	1	NOVA1
RDH11	0.221286	0.148337	0.414	0.469	1	RDH11
SNAPIN	0.746681	0.148245	0.324	0.381	1	SNAPIN
WNK2	0.000981853	0.148223	0.385	0.377	1	WNK2
ALDH7A1	0.00183364	0.147924	0.502	0.543	1	ALDH7A1
CDCA7	0.0454577	0.1479	0.159	0.15	1	CDCA7
NAALAD2	6.37e-07	0.147864	0.122	0.082	0.0233126	NAALAD2
MOSPD1	0.00444777	0.147842	0.257	0.246	1	MOSPD1
DGAT1	0.00927246	0.147369	0.255	0.248	1	DGAT1
SLC3A2	0.296118	0.147304	0.365	0.423	1	SLC3A2
TPGS2	0.0113435	0.147248	0.465	0.508	1	TPGS2
CXXC4	0.110294	0.146906	0.31	0.327	1	CXXC4
DOT1L	0.0048603	0.146817	0.309	0.305	1	DOT1L
ZNF395	0.000204164	0.146771	0.204	0.172	1	ZNF395
TBL1X	0.129575	0.146614	0.288	0.308	1	TBL1X
METTL23	0.257126	0.146596	0.34	0.381	1	METTL23
PDLIM2	0.0587674	0.146507	0.427	0.467	1	PDLIM2
EFNB1	3.21e-05	0.146381	0.165	0.13	1	EFNB1
CD27-AS1	5.01e-07	0.146239	0.218	0.167	0.0183436	CD27-AS1
EXOSC1	0.869307	0.146136	0.308	0.367	1	EXOSC1
ZMYM2	0.00177533	0.146124	0.557	0.614	1	ZMYM2
TFPI	9.55e-09	0.145943	0.106	0.062	0.000349456	TFPI
HSPB11	0.140276	0.14593	0.344	0.374	1	HSPB11
GIGYF1	7.94e-05	0.145799	0.212	0.177	1	GIGYF1
PNPLA4	0.0555768	0.145784	0.254	0.259	1	PNPLA4
ZSCAN1	2.25e-12	0.145696	0.133	0.075	8.22e-08	ZSCAN1
TM2D3	0.0165238	0.145668	0.314	0.32	1	TM2D3
PARVB	1.32e-07	0.145613	0.191	0.14	0.00481588	PARVB
SNRPA1	0.0789733	0.145534	0.473	0.528	1	SNRPA1
TAF9	0.0474282	0.145524	0.499	0.56	1	TAF9
POLR2H	0.0421006	0.145429	0.459	0.508	1	POLR2H
MRPS25	0.00623641	0.145308	0.569	0.638	1	MRPS25
LMBRD1	5.21e-05	0.14519	0.209	0.174	1	LMBRD1
DYRK4	0.112008	0.145145	0.27	0.285	1	DYRK4
NDUFA5	1.69e-09	0.145144	0.84	0.829	6.18e-05	NDUFA5
TRAPPC4	0.0394358	0.145028	0.442	0.492	1	TRAPPC4
RNF208	0.00211606	0.145011	0.295	0.279	1	RNF208
SRA1	0.160417	0.144994	0.435	0.492	1	SRA1
ETFRF1	0.952605	0.144892	0.319	0.38	1	ETFRF1
WTAP	0.413672	0.14489	0.41	0.477	1	WTAP
CTBP1	0.339148	0.144847	0.316	0.358	1	CTBP1
ZNF468	0.010911	0.144734	0.13	0.113	1	ZNF468
MED31	0.967905	0.144633	0.255	0.298	1	MED31
PAFAH1B3	0.0303942	0.144575	0.496	0.55	1	PAFAH1B3
AL513534.2	0.191569	0.144381	0.221	0.225	1	AL513534.2
TNRC18	0.401568	0.144375	0.293	0.322	1	TNRC18
ERP44	0.393181	0.144295	0.335	0.383	1	ERP44
SF3B4	0.90622	0.144157	0.287	0.336	1	SF3B4
NPDC1	0.549379	0.144151	0.244	0.267	1	NPDC1
MRPS18A	0.610454	0.144071	0.33	0.38	1	MRPS18A
BCL2L1	0.251814	0.143918	0.239	0.254	1	BCL2L1
TP53TG1	0.000441881	0.143899	0.178	0.15	1	TP53TG1
RBM38	1.72e-05	0.143875	0.692	0.739	0.631226	RBM38
PTPRE	1.07e-06	0.143874	0.187	0.139	0.0391121	PTPRE
BLCAP	0.303911	0.143606	0.374	0.428	1	BLCAP
MGST2	0.331714	0.143574	0.414	0.477	1	MGST2
CDK9	0.000679892	0.143532	0.248	0.224	1	CDK9
MAP1B	9.18e-05	0.143483	0.827	0.794	1	MAP1B
TSR3	0.122045	0.143453	0.438	0.49	1	TSR3
MRPS17	0.116903	0.14337	0.432	0.493	1	MRPS17
GIHCG	0.147746	0.143273	0.268	0.282	1	GIHCG
COL11A2	3.34e-08	0.14322	0.178	0.125	0.00122423	COL11A2
KDM5B	1.85e-07	0.143167	0.791	0.823	0.00677828	KDM5B
CYSTM1	0.209553	0.143	0.385	0.44	1	CYSTM1
AKIRIN2	0.305451	0.142912	0.347	0.393	1	AKIRIN2
SLC22A18	0.0038744	0.142838	0.178	0.155	1	SLC22A18
COPS7B	0.0702953	0.14276	0.222	0.225	1	COPS7B
TOMM34	0.802151	0.142561	0.253	0.29	1	TOMM34
ANTKMT	0.173195	0.142426	0.382	0.434	1	ANTKMT
NELFCD	0.363835	0.142417	0.325	0.367	1	NELFCD
CLPTM1	0.246362	0.142405	0.317	0.353	1	CLPTM1
SPIN2B	0.0363066	0.142392	0.184	0.176	1	SPIN2B
ECHS1	0.000374214	0.142348	0.761	0.788	1	ECHS1
ATF6B	0.0020879	0.142268	0.18	0.157	1	ATF6B
TMEM88	0.716298	0.142254	0.526	0.601	1	TMEM88
SCRN2	0.028417	0.142092	0.297	0.305	1	SCRN2
FUCA1	5.69e-06	0.14198	0.149	0.11	0.208425	FUCA1
RPL9	5.9e-18	0.141872	0.995	0.989	2.16e-13	RPL9
LUC7L3	6.78e-10	0.141813	0.823	0.83	2.48e-05	LUC7L3
TUBB	2.76e-11	0.141811	0.927	0.913	1.01e-06	TUBB
LITAF	0.396535	0.141703	0.198	0.211	1	LITAF
TRIOBP	0.00195961	0.141623	0.564	0.608	1	TRIOBP
INSIG1	0.347416	0.14159	0.176	0.182	1	INSIG1
NFATC2IP	0.574081	0.141534	0.363	0.422	1	NFATC2IP
NAE1	0.109952	0.141485	0.437	0.493	1	NAE1
PLPP1	0.0189824	0.141384	0.18	0.168	1	PLPP1
BUD23	0.0242525	0.141378	0.5	0.548	1	BUD23
DDX41	0.340944	0.14106	0.309	0.335	1	DDX41
EMC3	0.0650335	0.141057	0.401	0.444	1	EMC3
NXT1	0.29284	0.141052	0.186	0.195	1	NXT1
MEGF8	0.0836521	0.141011	0.34	0.37	1	MEGF8
RIMKLA	0.000550907	0.140819	0.293	0.269	1	RIMKLA
GLI4	0.00693201	0.140767	0.234	0.221	1	GLI4
AC020909.2	7.68e-18	0.140727	0.993	0.991	2.81e-13	AC020909.2
TIMM22	0.440745	0.140674	0.338	0.391	1	TIMM22
AP1S1	0.135795	0.140628	0.234	0.244	1	AP1S1
SAMM50	0.00757559	0.140588	0.486	0.536	1	SAMM50
ARID3A	0.000428998	0.140556	0.58	0.622	1	ARID3A
MAP3K1	0.0147551	0.140537	0.229	0.216	1	MAP3K1
GULP1	0.849483	0.140494	0.226	0.254	1	GULP1
MYDGF	0.00624963	0.14047	0.475	0.493	1	MYDGF
PLCXD1	0.283198	0.140393	0.204	0.213	1	PLCXD1
EVL	0.0309241	0.140384	0.251	0.331	1	EVL
ORAI1	0.0675392	0.140373	0.372	0.405	1	ORAI1
CCM2	0.746559	0.140118	0.221	0.248	1	CCM2
TMEM208	0.367716	0.139757	0.395	0.459	1	TMEM208
CCNL1	0.511872	0.139755	0.376	0.427	1	CCNL1
PINK1	0.182447	0.139715	0.409	0.46	1	PINK1
ETV5	7.34e-05	0.139694	0.16	0.125	1	ETV5
CACNG8	2.19e-15	0.139686	0.146	0.076	8.01e-11	CACNG8
BCAS2	0.227249	0.139515	0.433	0.498	1	BCAS2
RAB18	0.166602	0.139441	0.433	0.498	1	RAB18
KHDC4	0.930132	0.139321	0.219	0.248	1	KHDC4
SCO2	0.48309	0.139302	0.315	0.356	1	SCO2
SYNE4	1.15e-25	0.139256	0.102	0.033	4.21e-21	SYNE4
RTL8C	1.2e-05	0.139252	0.757	0.778	0.439707	RTL8C
PIP4K2B	0.467632	0.139211	0.305	0.346	1	PIP4K2B
BPHL	0.0176211	0.139168	0.257	0.255	1	BPHL
GIPR	2.05e-14	0.13912	0.145	0.077	7.52e-10	GIPR
ATAT1	0.0150655	0.139099	0.155	0.14	1	ATAT1
GET1	0.0970557	0.139095	0.444	0.504	1	GET1
ILF2	0.00282189	0.139065	0.636	0.681	1	ILF2
EXOSC3	0.0997748	0.139037	0.225	0.233	1	EXOSC3
CREBZF	0.0924753	0.138938	0.264	0.27	1	CREBZF
MAF	3.57e-08	0.138892	0.16	0.108	0.00130694	MAF
MRPS22	0.0778117	0.138834	0.406	0.454	1	MRPS22
CHCHD5	0.137292	0.138634	0.426	0.477	1	CHCHD5
MRPL54	0.00133757	0.138466	0.517	0.558	1	MRPL54
TLE3	1.69e-06	0.138422	0.147	0.105	0.0616965	TLE3
IQGAP2	0.00371246	0.13831	0.18	0.158	1	IQGAP2
PIFO	0.00224135	0.138218	0.213	0.192	1	PIFO
CERS4	1.16e-05	0.138144	0.184	0.144	0.426081	CERS4
NOMO1	1.82e-06	0.137914	0.169	0.126	0.0667503	NOMO1
MRPS23	0.0597212	0.13783	0.53	0.6	1	MRPS23
KDM3A	0.0571885	0.13776	0.403	0.425	1	KDM3A
MOB1A	0.635583	0.137684	0.384	0.448	1	MOB1A
GPN1	0.927547	0.137655	0.231	0.266	1	GPN1
TBC1D7	0.994152	0.137569	0.279	0.328	1	TBC1D7
SDHA	5.69e-05	0.137531	0.664	0.726	1	SDHA
SPIN1	0.603337	0.13748	0.403	0.474	1	SPIN1
SELENOM	0.0338785	0.137376	0.278	0.278	1	SELENOM
VSTM2L	0.000593744	0.137276	0.296	0.266	1	VSTM2L
SLC27A5	0.196218	0.137228	0.194	0.198	1	SLC27A5
ALDH2	0.0016258	0.137222	0.558	0.61	1	ALDH2
HES4	0.324103	0.137053	0.295	0.357	1	HES4
TBKBP1	0.0121627	0.137011	0.22	0.206	1	TBKBP1
COX7C	4.13e-19	0.136994	0.995	0.987	1.51e-14	COX7C
NSMCE2	0.312459	0.136879	0.274	0.299	1	NSMCE2
STRBP	0.374351	0.136822	0.399	0.453	1	STRBP
DUSP5	0.745763	0.136752	0.285	0.314	1	DUSP5
CU638689.4	0.0679778	0.136674	0.169	0.161	1	CU638689.4
DDB1	0.000954215	0.136517	0.604	0.663	1	DDB1
LSS	0.34026	0.136491	0.247	0.268	1	LSS
ZC2HC1A	0.0201989	0.136448	0.425	0.456	1	ZC2HC1A
CAMK2A	0.000121097	0.13631	0.196	0.161	1	CAMK2A
HMGCL	0.00667822	0.136233	0.265	0.253	1	HMGCL
UBE2L3	4.46e-05	0.136172	0.72	0.723	1	UBE2L3
EWSR1	0.00351098	0.13609	0.505	0.541	1	EWSR1
H2AFY2	0.0989782	0.136034	0.418	0.474	1	H2AFY2
SALL4	0.00850147	0.13579	0.187	0.17	1	SALL4
ZCCHC17	0.2274	0.13569	0.491	0.546	1	ZCCHC17
ARSD	0.00363862	0.135674	0.222	0.203	1	ARSD
BRAT1	0.153798	0.135646	0.209	0.213	1	BRAT1
NDRG2	0.0047311	0.135564	0.575	0.636	1	NDRG2
DCTN5	0.793257	0.135563	0.304	0.352	1	DCTN5
NIF3L1	0.233337	0.135547	0.202	0.209	1	NIF3L1
GNB2	0.0180077	0.135509	0.529	0.579	1	GNB2
BTF3L4	0.0109851	0.135466	0.566	0.624	1	BTF3L4
HEPH	0.491788	0.135444	0.323	0.389	1	HEPH
DTD1	0.951463	0.13533	0.291	0.345	1	DTD1
TRAPPC3	0.888426	0.135202	0.398	0.476	1	TRAPPC3
CDK5	0.455424	0.134929	0.192	0.205	1	CDK5
STX16	0.00710337	0.134776	0.505	0.549	1	STX16
HMG20B	0.494809	0.134662	0.295	0.33	1	HMG20B
ZNF516	0.0235127	0.134661	0.206	0.194	1	ZNF516
YWHAQ	0.00161854	0.134572	0.8	0.819	1	YWHAQ
PTBP1	0.417379	0.134475	0.307	0.346	1	PTBP1
HACD3	0.120927	0.134268	0.517	0.574	1	HACD3
GID8	0.126181	0.134267	0.344	0.375	1	GID8
GEMIN2	0.089839	0.134256	0.184	0.183	1	GEMIN2
DGCR6L	0.606013	0.134251	0.327	0.375	1	DGCR6L
UBE2R2	0.000384151	0.134184	0.62	0.672	1	UBE2R2
TBCA	3.6e-07	0.134181	0.903	0.906	0.0131835	TBCA
TMOD3	0.288376	0.134158	0.228	0.243	1	TMOD3
PPP1R35	0.565291	0.134144	0.276	0.313	1	PPP1R35
EIF4A1	3.7e-06	0.1341	0.926	0.921	0.135334	EIF4A1
C1orf35	0.475783	0.133985	0.275	0.305	1	C1orf35
CANT1	0.70307	0.133965	0.21	0.233	1	CANT1
VPS72	0.847642	0.133964	0.207	0.239	1	VPS72
AK6	0.720087	0.133822	0.308	0.356	1	AK6
TRAPPC2B	0.148128	0.133801	0.22	0.225	1	TRAPPC2B
LGALS3BP	0.00111714	0.133688	0.181	0.153	1	LGALS3BP
GTPBP8	0.511891	0.133631	0.321	0.366	1	GTPBP8
RPS3	8.75e-13	0.133625	0.998	0.987	3.2e-08	RPS3
XYLT2	0.000292293	0.133583	0.159	0.129	1	XYLT2
PDPR	0.00052658	0.133568	0.245	0.217	1	PDPR
TMEM223	0.11926	0.13352	0.513	0.579	1	TMEM223
MED11	0.67384	0.133349	0.269	0.303	1	MED11
DEXI	0.318886	0.133344	0.317	0.357	1	DEXI
ASB2	0.12129	0.133155	0.523	0.58	1	ASB2
TM2D2	0.365299	0.133131	0.313	0.353	1	TM2D2
IKZF4	0.00518625	0.132932	0.186	0.167	1	IKZF4
AL161772.1	0.000184389	0.132876	0.14	0.11	1	AL161772.1
TBX2-AS1	0.905587	0.132826	0.365	0.406	1	TBX2-AS1
ARV1	0.926387	0.132699	0.249	0.285	1	ARV1
CCDC8	0.189839	0.132674	0.388	0.432	1	CCDC8
RPP30	0.544095	0.132649	0.303	0.344	1	RPP30
NEDD9	0.0861024	0.132541	0.165	0.156	1	NEDD9
ABL1	0.157	0.132518	0.271	0.286	1	ABL1
CBY1	0.990893	0.132453	0.26	0.303	1	CBY1
DYNC2LI1	0.000966125	0.132296	0.196	0.17	1	DYNC2LI1
RPS6KB2	0.18824	0.13212	0.307	0.336	1	RPS6KB2
TEAD3	0.32057	0.132044	0.274	0.299	1	TEAD3
WDR77	0.823543	0.132026	0.263	0.313	1	WDR77
TCTN3	0.856601	0.131939	0.213	0.244	1	TCTN3
RAB7A	0.654612	0.131859	0.474	0.561	1	RAB7A
MBIP	0.140236	0.131805	0.255	0.266	1	MBIP
GPR157	0.000525435	0.131787	0.131	0.102	1	GPR157
MRPS26	0.133668	0.131785	0.602	0.682	1	MRPS26
CCNH	0.0822551	0.131782	0.238	0.243	1	CCNH
STAC	1.69e-18	0.13173	0.112	0.048	6.19e-14	STAC
DNAJB11	0.0944345	0.131708	0.377	0.405	1	DNAJB11
KATNBL1	0.119085	0.131624	0.373	0.413	1	KATNBL1
EMC4	0.110573	0.1316	0.452	0.505	1	EMC4
EFEMP2	0.236007	0.131451	0.405	0.456	1	EFEMP2
PEG10	0.902279	0.131441	0.506	0.576	1	PEG10
C11orf68	0.0710749	0.131429	0.201	0.196	1	C11orf68
ZNF652	0.614624	0.131277	0.411	0.478	1	ZNF652
BABAM1	0.516681	0.131242	0.371	0.43	1	BABAM1
IGSF3	0.127827	0.131182	0.419	0.461	1	IGSF3
YIPF5	0.896423	0.131035	0.369	0.433	1	YIPF5
CZIB	0.475517	0.130995	0.364	0.42	1	CZIB
UBE2D1	0.543874	0.130852	0.259	0.291	1	UBE2D1
SLC44A2	0.989026	0.130841	0.22	0.25	1	SLC44A2
PIGT	0.876153	0.130794	0.335	0.395	1	PIGT
ABCA2	9.65e-06	0.130772	0.159	0.119	0.353323	ABCA2
RBM18	0.545621	0.130727	0.243	0.293	1	RBM18
BAIAP2-DT	0.046537	0.130665	0.166	0.156	1	BAIAP2-DT
KHDRBS3	6.79e-05	0.130621	0.114	0.083	1	KHDRBS3
WDR86	0.000785413	0.13058	0.221	0.193	1	WDR86
SPRED2	0.000564434	0.130579	0.144	0.115	1	SPRED2
RPAIN	0.0167518	0.13056	0.626	0.697	1	RPAIN
CDK4	0.3106	0.130529	0.43	0.496	1	CDK4
FBXW4	0.0593051	0.130513	0.352	0.37	1	FBXW4
NDUFS2	1.26e-05	0.130442	0.791	0.822	0.45948	NDUFS2
CTTN	0.0814816	0.130155	0.488	0.543	1	CTTN
RAVER1	0.373349	0.129979	0.215	0.23	1	RAVER1
MED21	0.435845	0.129957	0.321	0.367	1	MED21
FZD2	0.121994	0.129866	0.35	0.383	1	FZD2
RAP2A	0.986322	0.129822	0.28	0.322	1	RAP2A
COPG1	0.693872	0.129812	0.27	0.31	1	COPG1
ACP2	0.449362	0.129744	0.247	0.271	1	ACP2
INPPL1	0.764388	0.129638	0.272	0.309	1	INPPL1
C11orf71	0.00137016	0.129599	0.158	0.131	1	C11orf71
SNX7	0.342595	0.129578	0.232	0.249	1	SNX7
HMBS	0.579022	0.129431	0.219	0.261	1	HMBS
RAP1B	0.832284	0.129356	0.413	0.486	1	RAP1B
STUB1	0.00114002	0.1293	0.673	0.719	1	STUB1
BSCL2	0.650185	0.129269	0.337	0.386	1	BSCL2
FITM2	0.366229	0.129244	0.26	0.286	1	FITM2
SAC3D1	0.975844	0.129215	0.249	0.287	1	SAC3D1
LSM2	0.103644	0.129078	0.526	0.598	1	LSM2
PSMC5	0.00037113	0.128915	0.652	0.647	1	PSMC5
TYK2	0.0910388	0.128836	0.348	0.368	1	TYK2
MRPL34	0.000383922	0.128825	0.701	0.73	1	MRPL34
ARPC2	7.52e-05	0.128806	0.853	0.853	1	ARPC2
NIT1	0.329988	0.128776	0.28	0.308	1	NIT1
HOMER3	0.62506	0.128764	0.278	0.311	1	HOMER3
RAD23A	0.00583639	0.128735	0.652	0.708	1	RAD23A
GNB1	0.00280154	0.128648	0.667	0.68	1	GNB1
AHCYL1	0.00101588	0.128474	0.579	0.636	1	AHCYL1
CRYZL1	0.0809919	0.128428	0.236	0.238	1	CRYZL1
NAA20	0.31046	0.128389	0.447	0.512	1	NAA20
ST3GAL1	0.0617636	0.128371	0.29	0.299	1	ST3GAL1
AC100810.1	0.713239	0.128346	0.311	0.353	1	AC100810.1
CIB1	0.0420089	0.128339	0.471	0.526	1	CIB1
GPR180	0.0598881	0.128288	0.15	0.141	1	GPR180
AAAS	0.227574	0.128251	0.254	0.271	1	AAAS
ABHD17B	0.00724301	0.128153	0.167	0.149	1	ABHD17B
LAMTOR1	0.00420064	0.128148	0.64	0.694	1	LAMTOR1
SERTAD1	0.464411	0.128135	0.209	0.225	1	SERTAD1
SPG7	0.68252	0.127918	0.391	0.454	1	SPG7
CLN5	0.161631	0.127844	0.196	0.196	1	CLN5
ADPRHL2	0.455112	0.127827	0.274	0.304	1	ADPRHL2
ABHD11	0.307082	0.127797	0.236	0.253	1	ABHD11
C1QTNF4	0.304415	0.127588	0.243	0.247	1	C1QTNF4
SLC50A1	0.530667	0.127566	0.211	0.23	1	SLC50A1
AC015522.1	3.91e-06	0.127541	0.145	0.102	0.142959	AC015522.1
SDR39U1	0.806432	0.127511	0.319	0.369	1	SDR39U1
HDAC2	0.00287828	0.127452	0.701	0.746	1	HDAC2
CASD1	0.12871	0.127139	0.299	0.313	1	CASD1
CLDND1	0.743003	0.127125	0.248	0.278	1	CLDND1
PSMD6	0.188415	0.127012	0.511	0.579	1	PSMD6
AMZ2	0.30778	0.127007	0.292	0.321	1	AMZ2
MBOAT7	0.121	0.126795	0.29	0.305	1	MBOAT7
RAB28	0.04547	0.126716	0.206	0.199	1	RAB28
FDXR	0.000199721	0.126533	0.191	0.157	1	FDXR
AC104041.1	3.43e-09	0.126402	0.149	0.095	0.000125614	AC104041.1
CLCNKB	2.75e-10	0.126343	0.122	0.07	1.01e-05	CLCNKB
AFP	1.74e-30	0.126303	0.149	0.055	6.37e-26	AFP
MAP1LC3B	0.000628567	0.12621	0.735	0.766	1	MAP1LC3B
SRSF1	0.00983285	0.126184	0.53	0.581	1	SRSF1
XBP1	0.494025	0.126133	0.411	0.475	1	XBP1
ABHD17A	0.25481	0.126108	0.445	0.514	1	ABHD17A
HDAC3	0.603735	0.125946	0.269	0.303	1	HDAC3
MIF	2.86e-19	0.125738	0.998	0.991	1.05e-14	MIF
NTHL1	0.465483	0.125722	0.338	0.382	1	NTHL1
PCNX3	7.62e-05	0.125714	0.156	0.123	1	PCNX3
ATG10	0.0905843	0.125662	0.247	0.252	1	ATG10
TGIF1	0.000527607	0.125659	0.163	0.135	1	TGIF1
SPG21	0.885122	0.125653	0.36	0.426	1	SPG21
EML2	0.018798	0.125451	0.172	0.158	1	EML2
AC011043.1	1.92e-05	0.125327	0.171	0.132	0.704372	AC011043.1
PYCR1	0.774872	0.125274	0.319	0.386	1	PYCR1
MRPL10	0.548419	0.125158	0.36	0.41	1	MRPL10
ASXL3	0.64249	0.125111	0.175	0.186	1	ASXL3
TAF10	0.00301604	0.124971	0.612	0.651	1	TAF10
C22orf39	0.445629	0.124944	0.417	0.486	1	C22orf39
SLC35B4	0.300457	0.124884	0.195	0.203	1	SLC35B4
WASHC3	0.751522	0.124772	0.297	0.343	1	WASHC3
USP22	0.0122244	0.124729	0.655	0.709	1	USP22
PCCB	0.692474	0.124538	0.322	0.373	1	PCCB
KLHL20	0.198826	0.124455	0.159	0.158	1	KLHL20
NGDN	0.819256	0.124414	0.184	0.209	1	NGDN
TCTEX1D2	0.390634	0.124358	0.329	0.374	1	TCTEX1D2
GVQW3	0.0591208	0.124232	0.183	0.173	1	GVQW3
CTDSP1	0.0583211	0.124228	0.322	0.335	1	CTDSP1
DYRK2	0.0403622	0.124081	0.451	0.488	1	DYRK2
FAM104B	0.400867	0.124061	0.212	0.226	1	FAM104B
POMGNT1	0.676619	0.123976	0.263	0.313	1	POMGNT1
JCAD	0.00233651	0.123968	0.254	0.229	1	JCAD
CIRBP	8.85e-10	0.123884	0.903	0.934	3.24e-05	CIRBP
BLVRB	0.332322	0.123817	0.377	0.426	1	BLVRB
ABT1	0.146138	0.123788	0.256	0.271	1	ABT1
TMEM170A	0.771258	0.123683	0.262	0.304	1	TMEM170A
RBM6	0.768917	0.123625	0.442	0.516	1	RBM6
MRPL58	0.610706	0.123571	0.36	0.416	1	MRPL58
MED7	0.339849	0.123542	0.209	0.22	1	MED7
PDE7A	0.0571079	0.123381	0.227	0.224	1	PDE7A
NELFB	0.493623	0.12329	0.279	0.311	1	NELFB
EIF6	0.00175709	0.12329	0.584	0.632	1	EIF6
AMT	0.849351	0.123288	0.34	0.397	1	AMT
YARS2	0.851033	0.123211	0.208	0.233	1	YARS2
SCAP	0.620593	0.123171	0.219	0.239	1	SCAP
CCDC167	0.371949	0.123036	0.399	0.456	1	CCDC167
VPS29	0.00198565	0.122872	0.554	0.564	1	VPS29
KCTD1	0.0635951	0.122852	0.139	0.128	1	KCTD1
TMEM259	0.331879	0.122823	0.405	0.468	1	TMEM259
TMEM242	0.89463	0.1228	0.321	0.382	1	TMEM242
RARS2	0.455257	0.122719	0.375	0.431	1	RARS2
COLGALT1	0.622459	0.122648	0.196	0.212	1	COLGALT1
IDH3G	0.183091	0.122627	0.497	0.578	1	IDH3G
INTS5	0.000415073	0.122596	0.146	0.117	1	INTS5
PDCL	0.903827	0.122519	0.2	0.229	1	PDCL
CASP6	0.308529	0.122335	0.185	0.225	1	CASP6
FRMD4A	6.39e-07	0.122294	0.162	0.116	0.0234023	FRMD4A
CFLAR	0.250914	0.122167	0.398	0.444	1	CFLAR
CHMP4A	0.94814	0.122147	0.363	0.439	1	CHMP4A
HNRNPH2	0.466389	0.12213	0.461	0.537	1	HNRNPH2
CRNDE	0.0415075	0.122089	0.546	0.596	1	CRNDE
MACROD1	0.493248	0.122078	0.307	0.333	1	MACROD1
ZFX	0.410934	0.121952	0.284	0.31	1	ZFX
CMC4	0.656103	0.121923	0.273	0.309	1	CMC4
FAM32A	0.0313129	0.121914	0.513	0.571	1	FAM32A
ALDH1B1	0.087633	0.121863	0.155	0.148	1	ALDH1B1
ZNF827	0.57911	0.121793	0.444	0.52	1	ZNF827
RPP14	0.72222	0.12175	0.223	0.248	1	RPP14
GCA	0.15702	0.121666	0.223	0.229	1	GCA
CA14	0.0623964	0.121527	0.175	0.166	1	CA14
PLXDC2	0.000111205	0.121525	0.215	0.178	1	PLXDC2
POLR2C	0.260451	0.121499	0.41	0.47	1	POLR2C
SLC25A1	0.747617	0.121467	0.38	0.444	1	SLC25A1
BCAS4	0.809094	0.121396	0.151	0.169	1	BCAS4
SCAF1	0.168163	0.12137	0.247	0.31	1	SCAF1
CRIPT	0.662772	0.121365	0.336	0.387	1	CRIPT
RBM41	0.0446356	0.121317	0.313	0.321	1	RBM41
ARPC4	0.953832	0.121276	0.381	0.459	1	ARPC4
YIF1B	0.330936	0.121189	0.235	0.291	1	YIF1B
LYPLA2	0.215976	0.121166	0.252	0.316	1	LYPLA2
TRABD	0.483481	0.121109	0.195	0.206	1	TRABD
TOR2A	0.00116407	0.120971	0.127	0.102	1	TOR2A
HEBP1	0.766774	0.12092	0.424	0.496	1	HEBP1
CPAMD8	8.93e-16	0.120844	0.111	0.051	3.27e-11	CPAMD8
CCDC28B	0.706649	0.120837	0.367	0.449	1	CCDC28B
APH1A	0.414693	0.120829	0.31	0.345	1	APH1A
CTTNBP2	0.651184	0.120803	0.31	0.346	1	CTTNBP2
ZMYM3	0.690469	0.120795	0.316	0.377	1	ZMYM3
LINGO1	0.0015376	0.120771	0.163	0.135	1	LINGO1
RBM5	0.050968	0.120701	0.493	0.556	1	RBM5
FZD7	0.483445	0.120649	0.203	0.231	1	FZD7
NRSN2	0.226015	0.120533	0.222	0.232	1	NRSN2
LACTB	0.336958	0.120524	0.32	0.356	1	LACTB
ARL1	0.103559	0.120487	0.507	0.581	1	ARL1
SNHG3	0.00307771	0.120352	0.195	0.269	1	SNHG3
RPL35A	1.51e-13	0.120334	0.999	0.99	5.51e-09	RPL35A
UBE2J2	0.428382	0.120306	0.318	0.395	1	UBE2J2
ECE1	0.40183	0.120103	0.286	0.35	1	ECE1
H6PD	0.000648383	0.120055	0.181	0.151	1	H6PD
QDPR	0.760486	0.120044	0.365	0.426	1	QDPR
TWF2	0.469169	0.120024	0.207	0.224	1	TWF2
GGA1	0.357553	0.119808	0.247	0.267	1	GGA1
MTERF4	0.682245	0.119637	0.283	0.336	1	MTERF4
PAXX	0.7264	0.119623	0.371	0.434	1	PAXX
TFRC	0.158066	0.119612	0.421	0.451	1	TFRC
TMX2	0.593465	0.119599	0.388	0.451	1	TMX2
ELAVL1	0.135617	0.119561	0.499	0.565	1	ELAVL1
COMMD8	0.530253	0.119487	0.272	0.329	1	COMMD8
CPNE1	0.00618005	0.119432	0.582	0.641	1	CPNE1
PDHA1	2.25e-05	0.119347	0.857	0.872	0.822472	PDHA1
EIF2B2	0.779338	0.119244	0.238	0.267	1	EIF2B2
PRMT6	0.738604	0.11918	0.167	0.191	1	PRMT6
YIPF2	0.548106	0.119112	0.174	0.186	1	YIPF2
PPOX	0.0278557	0.119087	0.147	0.133	1	PPOX
SRGAP1	0.261865	0.118916	0.22	0.23	1	SRGAP1
MIR1915HG	0.382592	0.118728	0.304	0.334	1	MIR1915HG
PDIA3	4.38e-05	0.118456	0.79	0.802	1	PDIA3
AC097534.2	0.000384196	0.118427	0.158	0.126	1	AC097534.2
COL27A1	9.36e-09	0.118154	0.158	0.104	0.000342615	COL27A1
TRIM13	0.259325	0.118098	0.273	0.291	1	TRIM13
SIRT5	0.0254427	0.118093	0.204	0.191	1	SIRT5
TMEM41B	0.997661	0.118085	0.381	0.457	1	TMEM41B
HADH	0.620866	0.117991	0.39	0.45	1	HADH
PEX2	0.73898	0.117928	0.293	0.346	1	PEX2
S100A16	0.401662	0.1179	0.263	0.317	1	S100A16
DHRS7B	0.0993157	0.117796	0.185	0.182	1	DHRS7B
MTMR9	0.772278	0.117774	0.239	0.271	1	MTMR9
LINC01170	1.13e-15	0.117703	0.115	0.053	4.15e-11	LINC01170
VANGL2	0.000505709	0.117527	0.167	0.137	1	VANGL2
CBX4	0.351082	0.117519	0.236	0.25	1	CBX4
NECAP2	0.436183	0.117485	0.163	0.191	1	NECAP2
ZCCHC3	0.795076	0.117457	0.301	0.352	1	ZCCHC3
TNFRSF1A	0.0867058	0.117457	0.148	0.141	1	TNFRSF1A
EXT1	0.410682	0.117408	0.342	0.381	1	EXT1
MAP1S	0.985772	0.1174	0.196	0.22	1	MAP1S
HTATSF1	0.497625	0.117396	0.566	0.65	1	HTATSF1
FST	9.72e-05	0.117351	0.171	0.136	1	FST
RITA1	0.947414	0.117337	0.183	0.206	1	RITA1
ZFYVE21	0.665785	0.117245	0.361	0.421	1	ZFYVE21
ZNHIT3	0.796695	0.117184	0.422	0.511	1	ZNHIT3
NPEPL1	0.485245	0.117183	0.209	0.223	1	NPEPL1
TMEM186	0.0692476	0.117088	0.162	0.154	1	TMEM186
TESC	0.0399086	0.116831	0.249	0.241	1	TESC
MIF4GD	0.0673162	0.116791	0.161	0.153	1	MIF4GD
NR2F6	0.0974811	0.116761	0.558	0.633	1	NR2F6
MAEA	0.865398	0.116606	0.308	0.364	1	MAEA
NUP50	0.393181	0.116529	0.297	0.327	1	NUP50
COPA	0.0651286	0.116509	0.561	0.641	1	COPA
NTAN1	0.329871	0.11634	0.262	0.323	1	NTAN1
PRR7	0.000769224	0.116196	0.137	0.108	1	PRR7
TRIAP1	0.225438	0.116183	0.296	0.369	1	TRIAP1
TMEM92	0.0105472	0.116172	0.146	0.127	1	TMEM92
TAZ	0.462832	0.116038	0.176	0.184	1	TAZ
C1orf50	0.61542	0.115997	0.31	0.374	1	C1orf50
RPL8	4.2e-16	0.115974	0.998	0.991	1.54e-11	RPL8
MUL1	0.154273	0.11588	0.181	0.18	1	MUL1
FBXO44	0.00338894	0.115852	0.161	0.137	1	FBXO44
CHMP1A	0.735383	0.115772	0.236	0.278	1	CHMP1A
WDR45	0.659323	0.115706	0.203	0.221	1	WDR45
REPS2	6.31e-06	0.115695	0.139	0.098	0.231108	REPS2
POLR2F	0.0136819	0.115631	0.614	0.657	1	POLR2F
SNHG30	0.124037	0.11557	0.162	0.202	1	SNHG30
UBA6-AS1	0.172991	0.115512	0.159	0.156	1	UBA6-AS1
NCK2	0.715552	0.115468	0.236	0.264	1	NCK2
XRRA1	0.600016	0.115322	0.173	0.182	1	XRRA1
FRMD8	0.00282461	0.115318	0.118	0.095	1	FRMD8
MOV10	0.000855707	0.115237	0.159	0.132	1	MOV10
DUT	8.79e-05	0.115187	0.575	0.568	1	DUT
AMOT	0.249703	0.115166	0.147	0.147	1	AMOT
CYHR1	0.174602	0.11514	0.448	0.508	1	CYHR1
NME3	0.687385	0.115125	0.449	0.54	1	NME3
LINC01569	0.00108074	0.115082	0.158	0.13	1	LINC01569
KANSL1	0.515287	0.11505	0.404	0.457	1	KANSL1
ARL16	0.704533	0.114938	0.427	0.504	1	ARL16
GLTP	0.145697	0.114928	0.221	0.281	1	GLTP
RCHY1	0.85596	0.114914	0.245	0.285	1	RCHY1
RPS3A	2.32e-11	0.114881	0.999	0.991	8.48e-07	RPS3A
ZNRF2	0.143046	0.114817	0.146	0.142	1	ZNRF2
MRPL55	0.421006	0.114812	0.431	0.497	1	MRPL55
RNF141	0.432614	0.114666	0.182	0.191	1	RNF141
CETN2	0.983914	0.114612	0.434	0.506	1	CETN2
CSK	0.955719	0.114554	0.239	0.272	1	CSK
Z83843.1	6.94e-06	0.114503	0.222	0.175	0.254093	Z83843.1
TMEM74B	0.000317755	0.114481	0.145	0.113	1	TMEM74B
KCNC3	0.000139263	0.114431	0.14	0.107	1	KCNC3
AFDN-DT	4.78e-06	0.114382	0.144	0.102	0.174834	AFDN-DT
NSL1	0.923796	0.114342	0.406	0.483	1	NSL1
GNG10	0.234665	0.114294	0.476	0.527	1	GNG10
PAGR1	0.602948	0.114274	0.462	0.53	1	PAGR1
GTF2H4	0.070536	0.114212	0.15	0.14	1	GTF2H4
ZSCAN16-AS1	0.607201	0.114212	0.382	0.447	1	ZSCAN16-AS1
MRPL42	0.959138	0.11416	0.442	0.531	1	MRPL42
DCAF13	0.945306	0.114134	0.374	0.448	1	DCAF13
TTC14	0.0937358	0.114093	0.342	0.361	1	TTC14
EPCAM	0.139086	0.114037	0.182	0.178	1	EPCAM
ARRDC1-AS1	0.943854	0.114016	0.161	0.177	1	ARRDC1-AS1
GAA	0.0584335	0.113948	0.193	0.183	1	GAA
SCAMP2	0.86927	0.113797	0.325	0.38	1	SCAMP2
INO80C	0.934156	0.113654	0.243	0.278	1	INO80C
LONP1	0.86726	0.11362	0.378	0.445	1	LONP1
LYRM1	0.327631	0.11356	0.29	0.317	1	LYRM1
SAMD4B	0.540195	0.113473	0.407	0.475	1	SAMD4B
SLC39A3	0.527548	0.113426	0.172	0.202	1	SLC39A3
UBE2A	0.872108	0.113411	0.38	0.456	1	UBE2A
FAM122B	0.0360333	0.113321	0.122	0.108	1	FAM122B
MYL7	0.546564	0.113218	0.987	0.999	1	MYL7
LEPROT	0.0188988	0.113205	0.584	0.646	1	LEPROT
METTL3	0.937013	0.113171	0.181	0.204	1	METTL3
DLGAP4	0.935338	0.113145	0.306	0.358	1	DLGAP4
AP000873.2	0.18942	0.113112	0.135	0.13	1	AP000873.2
CAPN1	0.618519	0.113043	0.318	0.365	1	CAPN1
[truncated: 7,742 more rows]
